# Supplementary material for: Large HBV Surface Protein-Induced Unfolded Protein Response Dynamically Regulates p27 Degradation in Hepatocellular Carcinoma Progression
Source: MDPI journal article supplement (doi:10.3390/ijms241813825), 2023-09-07

Figure S1

atgggaggttggtcatcaaaacctcgcaaaggcatggggacgaatctttctgttcccaaccctctgggattctttcccgatc  
atcagttggaccctgcattcggagccaactcaaacaatccagattgggacttcaaccccatcaaggaccactggccagca  
gccaaccaggtaggagtgggagcattcgggccagggtcaccctccacacggcggtatTTTggggtggagccctcag  
gctcagggcatattgaccacagtggtcaacaattcctcctcctgcctccaccaatcggcagtcaggaaggcagcctactccc  
atctctccaccttaagagacagtcattcctcagggcc**acg**cagtggaattccactgcctccaccaagctctgcaggatccca  
gagtcaggggtctgtatcttctgctggtgggtccagttcaggaacagtaaaccctgctccgaatattgcctctcacatctcg  
tcaatctccgcgaggactggggaccctgtgacgaac**acg**gagaacatcacatcaggattcctaggaccctgctcgtgtt  
acaggcgggggttttcttgttgacaagaatcctcacaataccgcagagtctagactcgtggtggacttctctcaatttttag  
ggggatctcccgtgtgtcttggccaaaattcgcagtcaccaacctccaatcactcaccaacctcctgtcctccaatttgctctg  
gttatcgctggatgtgtctgcggcggtttatcatattcctcttcatcctgctgctatgcctcatcttcttattggttcttctggattat  
caaggatgttggcgtttgtcctctaattccaggatcaacaacaaccagtacgggaccatgcaaaacctgcacgactcctg  
ctcaaggcaactctatgtttccctcatgttgctgtacaaaacctacggatggaaattgcacctgtattcccatcccatcgtcct  
gggctttcgcaaaatacctatgggagtgggcctcagtcgggttctcttggctcagtttactagtgccatttggtcagtggttcg  
tagggctttccccactgtttggctttcagctatatggatgatgtggtattggggggccaagtctgtacagcatcgtgagtcct  
ttataccgctgttaccaattttcttttctctctgggtatacatttaa

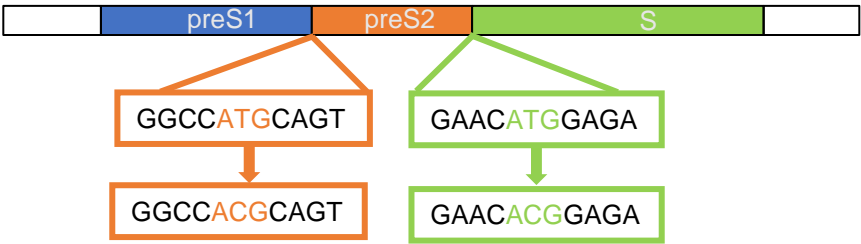

Figure S2

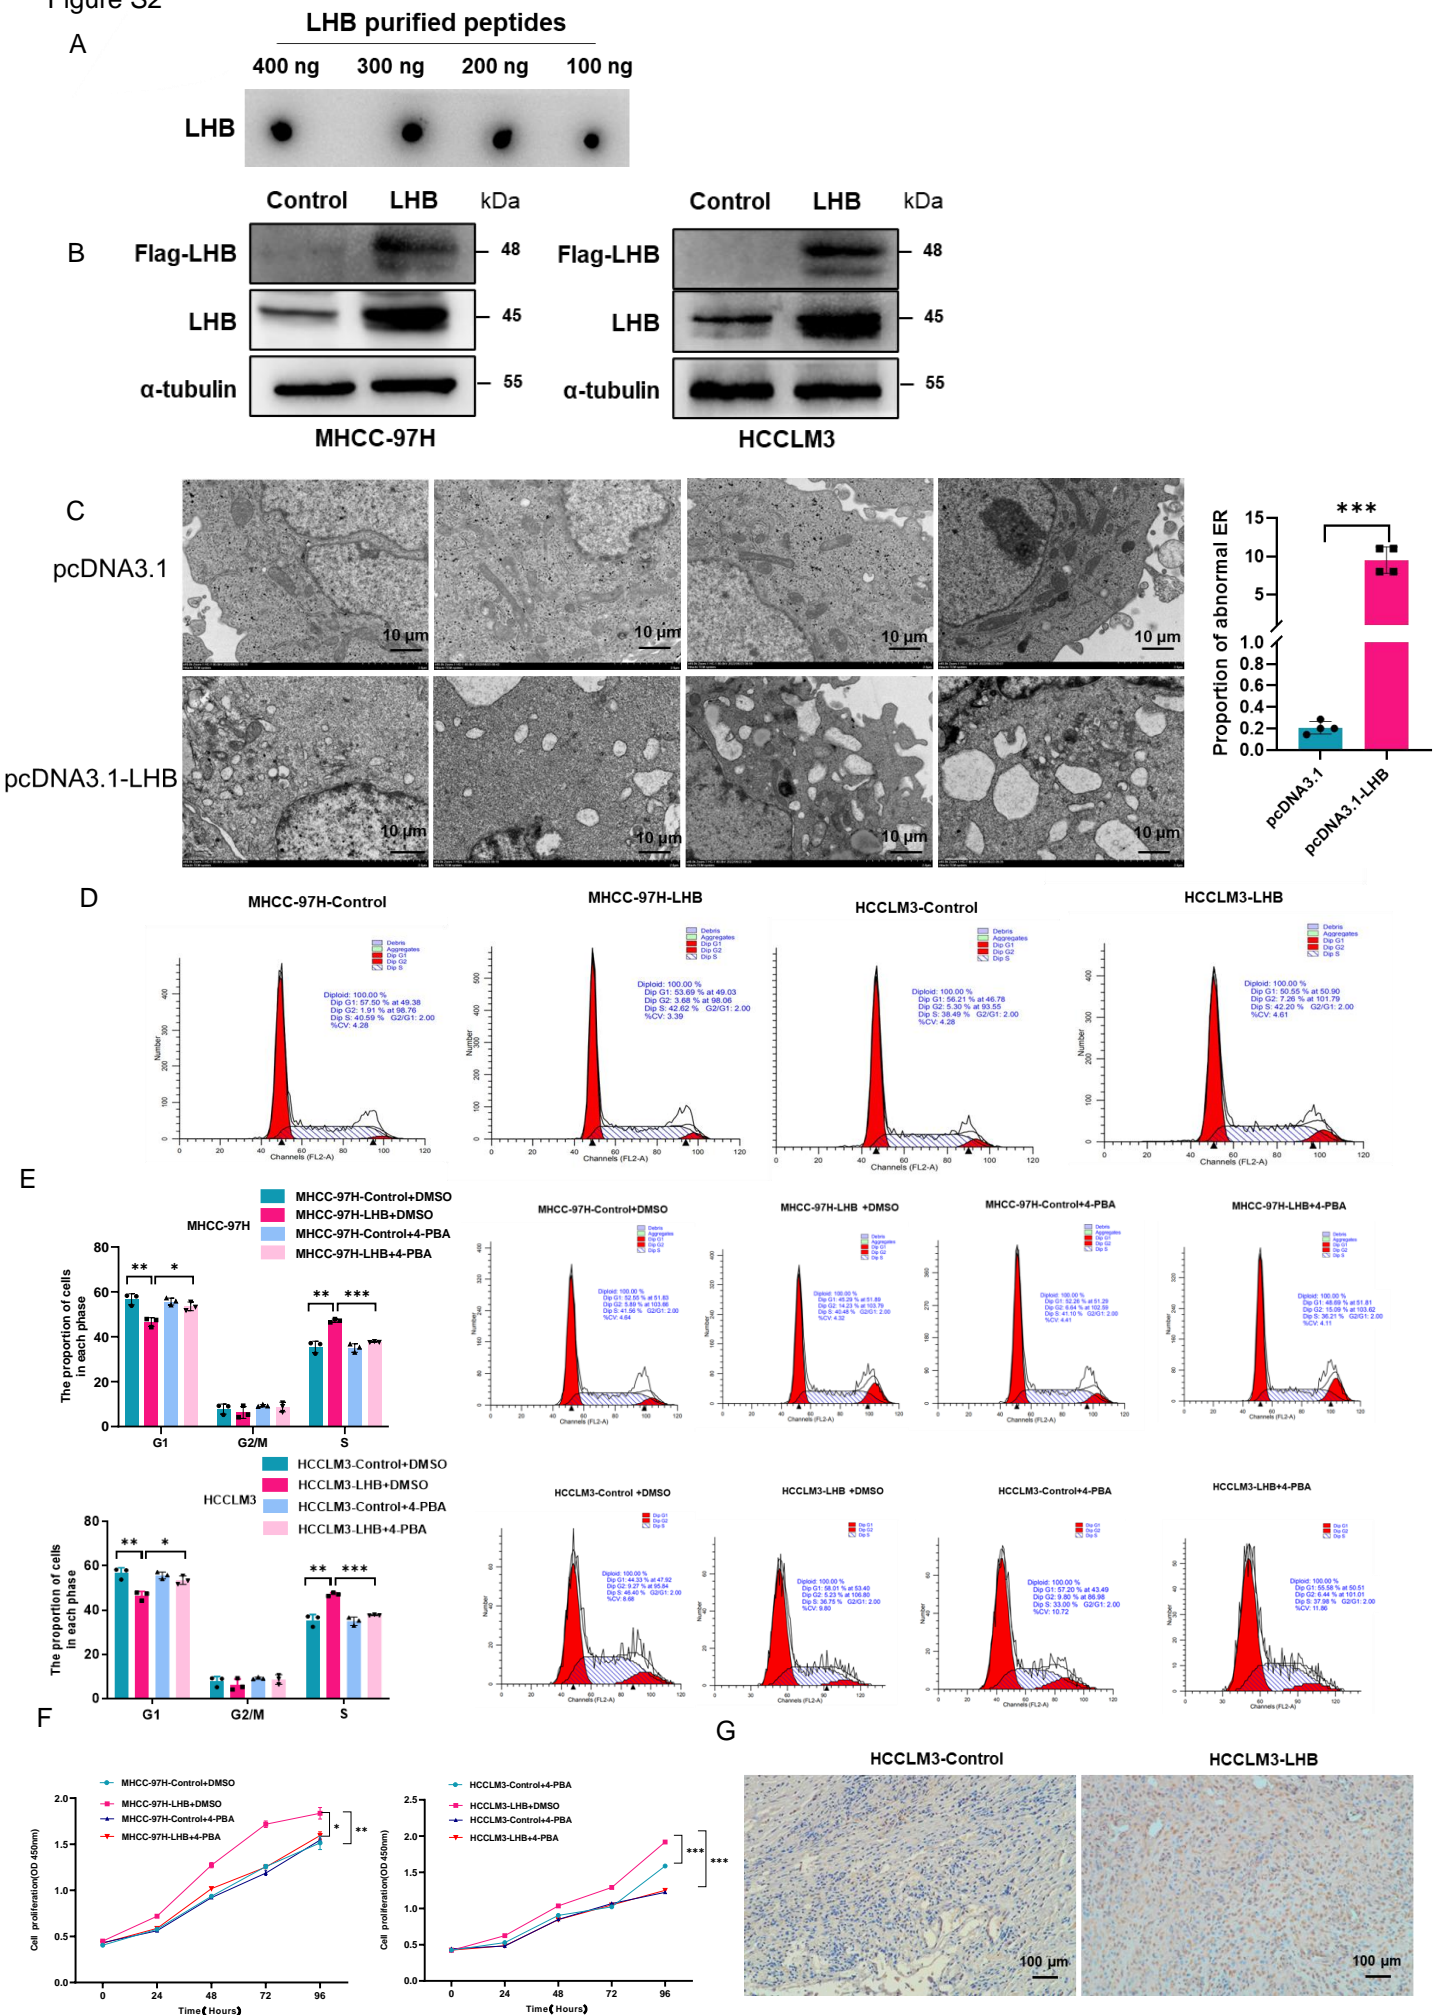

Figure S3

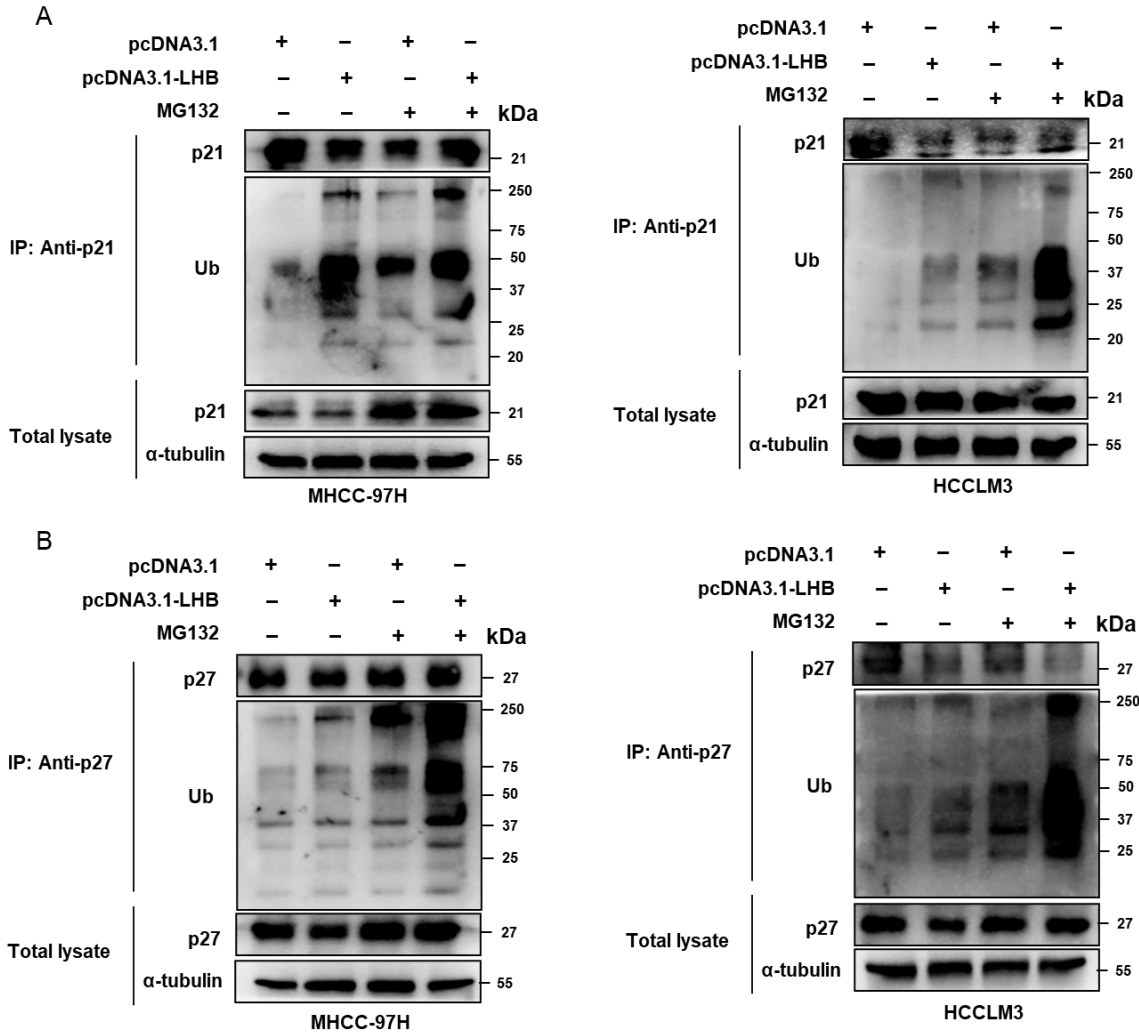

Figure S4

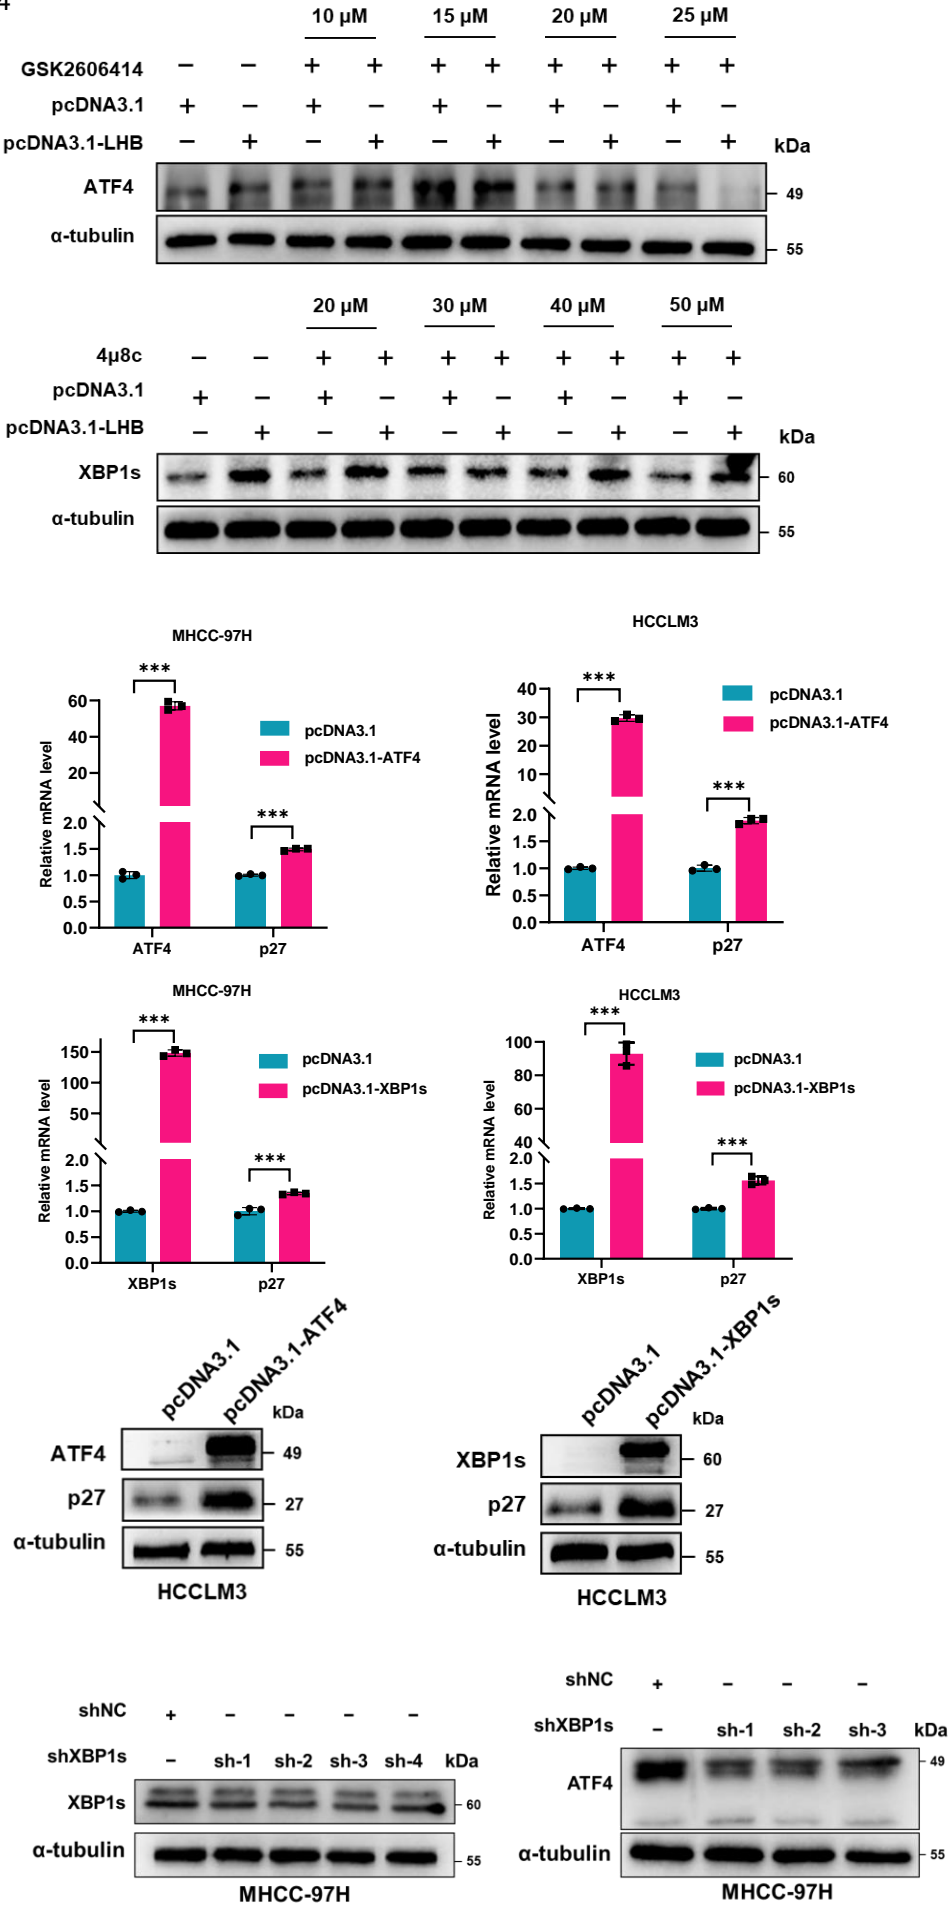

Figure S5

A

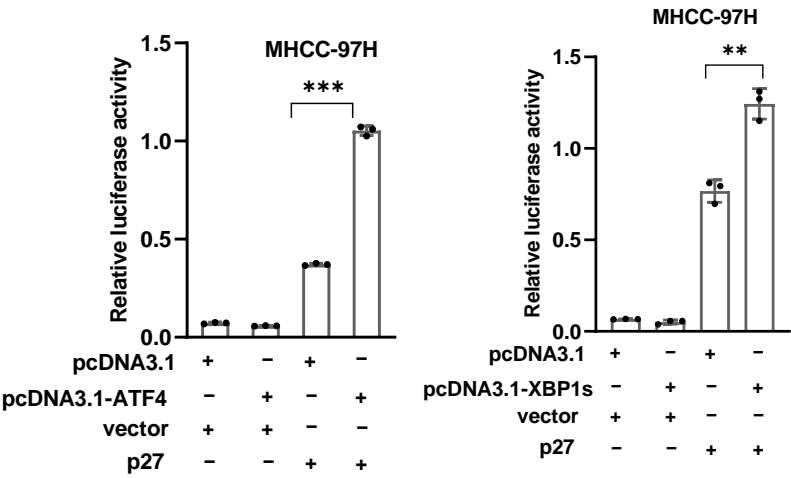

B

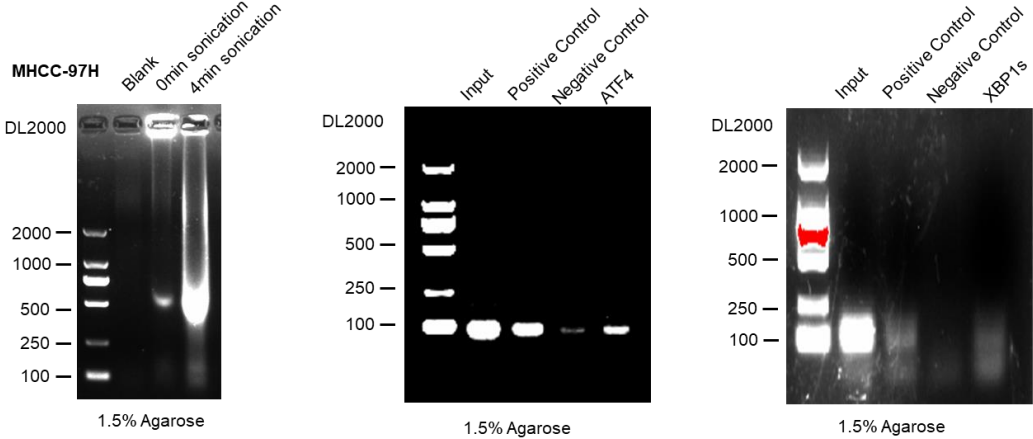

C

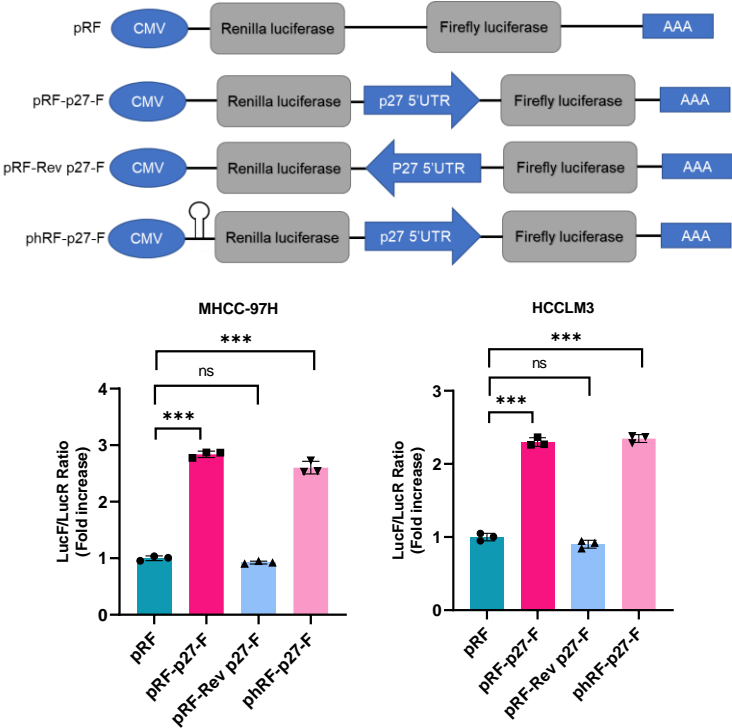

Figure S6

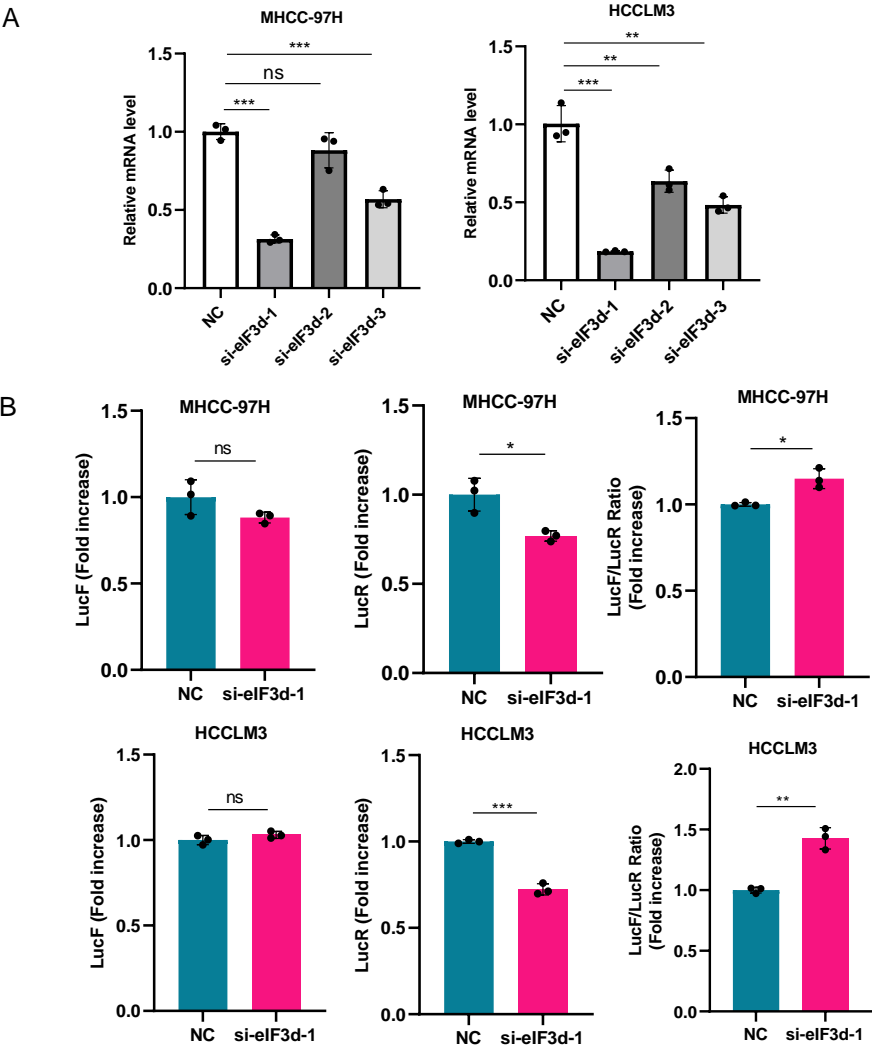

Figure S7

MHCC-97H-Control+shNC

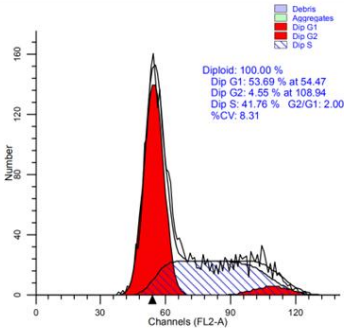

MHCC-97H-LHB+shNC

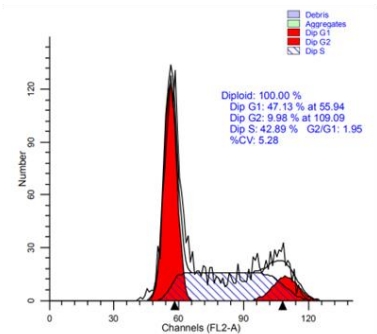

MHCC-97H-LHB+shHRD1

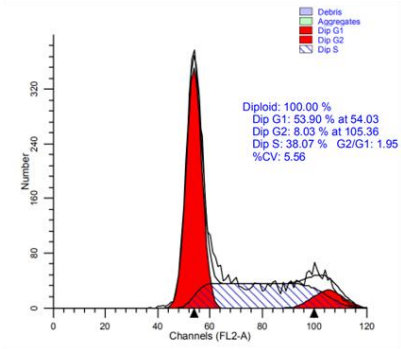

Figure S8

A

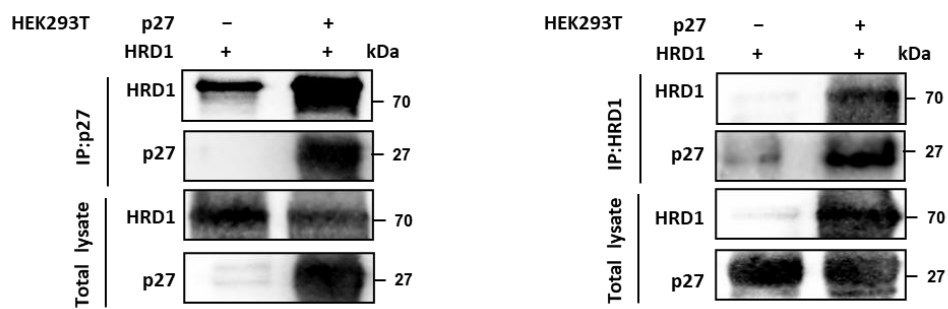

B

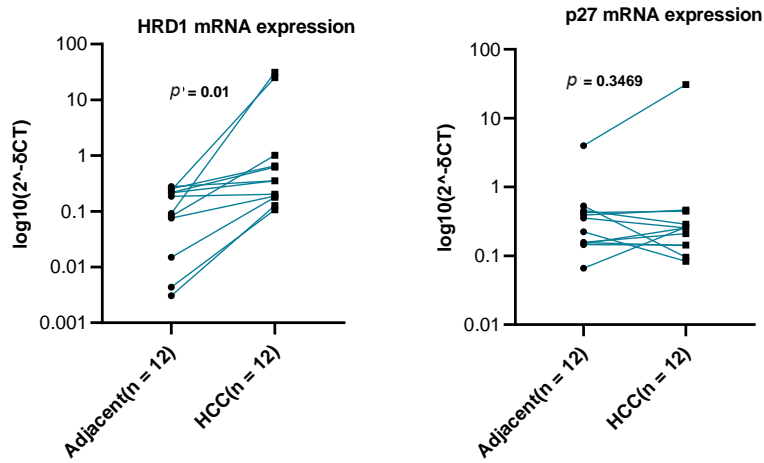



Figure S9

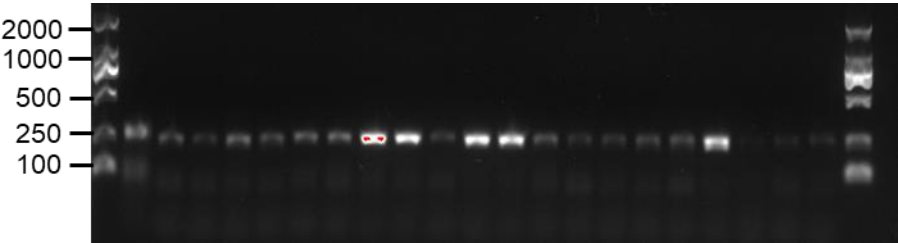

Supplement: s1 [file s1]
