# Supplementary material for: Large HBV Surface Protein-Induced Unfolded Protein Response Dynamically Regulates p27 Degradation in Hepatocellular Carcinoma Progression
Source: Int J Mol Sci. 2023 Sep 7;24(18):13825. doi: 10.3390/ijms241813825 (PMC10530851; doi:10.3390/ijms241813825)
Supplement: Supplementary file 1 [file ijms-24-13825-s001.zip]

Archive with 4 entries (4 files):
- Supplemental figure legend.pdf
- Supplementary Figures.pdf
- Supplementary Table S1.xlsx
- Supplementary Table S2.xls
