# Supplementary material for: Large HBV Surface Protein-Induced Unfolded Protein Response Dynamically Regulates p27 Degradation in Hepatocellular Carcinoma Progression
Source: Int J Mol Sci. 2023 Sep 7;24(18):13825. doi: 10.3390/ijms241813825 (PMC10530851; doi:10.3390/ijms241813825)
Supplement: Supplementary file 1 [file ijms-24-13825-s001.zip › Supplementary Table S1.xlsx]

## Sheet: Sheet1
Table S1. siRNA,shRNAs, and primer sequences in the study
	Names	Sequences
	shATF4-1	5’-GCCTAGGTCTCTTAGATGATT-3’
	shATF4-2	5’-GCCAAGCACTTCAAACCTCAT-3’
	shATF4-3	5’-GAGATCCAGTACCTGAAAGAT-3’
	shXBP1s-1	5’-GGAACAGCAAGTGGTAGATTT-3’
	shXBP1s-2	5’-GCCAAGCTGGAAGCCATTAAT-3’
For shRNA	shXBP1s-3	5’-GATCGAAAGAAGGCTCGAATG-3’
	shXBP1s-4	5’-GCCTTGTAGTTGAGAACCAGG-3’
	shHRD1-1	5’-GCTCACGCCTACTACCTCAAA-3’
	shHRD1-2	5’-GACCGTGTGGACTTTATGGAA-3’
	shHRD1-3	5’-AAGCTGTGACAGATGCCATCA-3’
	ATF4-F	5’-TTCTCCAGCGACAAGGCTAAGG-3’
	ATF4-R	5’-CTCCAACATCCAATCTGTCCCG-3’
	XBP1s-F	5’-TGAGTCCGCAGCAGGTGC-3’
	XBP1s-R	5’-CAACTTGTCCAGAATGCCCAAAAGG-3’
	XBP1u-F	5’-AAGAACACGCTTGGGAATGGACACGC-3’
	XBP1u-R	5’-ACCTGCTGCAGAGGTGCACATAGTC-3’
	CHOP-F	5’-GGTATGAGGACCTGCAAGAGGT-3’
For qPCR (human)	CHOP-R	5’-CTTGTGACCTCTGCTGGTTCTG-3’
	p27-F	5’-ATAAGGAAGCGACCTGCAACCG-3’
	p27-R	5’-TTCTTGGGCGTCTGCTCCACAG-3’
	p21-F	5’-AGGTGGACCTGGAGACTCTCAG-3’
	p21-R	5’-TCCTCTTGGAGAAGATCAGCCG-3’
	p18-F	5’-CGTCAATGCACAAAATGGATTTGG-3’
	p18-R	5’-GAATGACAGCGAAACCAGTTCGG-3’
	HRD1-F	5’-CCAACATCTCCTGGCTCTTTCAC-3’
	HRD1-R	5’-GTCAGGATGCTGTGATAGGCGT-3’
	β-actin-F	5’-AGCGAGCATCCCCCAAAGTT-3’
	β-actin-R	5’-GGGCACGAAGGCTCATCATT-3’
	p27-F-mouse	AGCAGTGTCCAGGGATGAGGAA
	p27-R-mouse	TTCTTGGGCGTCTGCTCCACAG
	p21-F-mouse	TCGCTGTCTTGCACTCTGGTGT
	p21-R-mouse	CCAATCTGCGCTTGGAGTGATAG
	p18-F-mouse	GTCAACGCTCAAAATGGATTTGGG
	p18-R-mouse	GGATTAGCACCTCTGAGGAGAAG
	ATF4-F-mouse	AACCTCATGGGTTCTCCAGCGA
For qPCR (mouse)	ATF4-R-mouse	CTCCAACATCCAATCTGTCCCG
	XBP1s-F-mouse	5’-CTGAGTCCGCAGCAGGTG-3’
	XBP1s-R-mouse	5’-TTCCAGCTTGGCTGATGAGG-3’
	XBP1u-F-mouse	5’-TACGGGAGAAAACTCACGGC-3’
	XBP1u-R-mouse	5’-ACATAGTCTGAGTGCTGCGG-3’
	CHOP-F-mouse	5’-GGAGGTCCTGTCCTCAGATGAA-3’
	CHOP-R-mouse	5’-GCTCCTCTGTCAGCCAAGCTAG-3’
	β-actin-F-mouse	5’-GTCCCTCACCCTCCCAAAAG-3’
	β-actin-R-mouse	5’-GCTGCCTCAACACCTCAACCC-3’
	oIMR0064	5’-AACATGGAGAACATCACATC-3’
	oIMR0065	5’-AGCGATAACCAGGACAAGTT-3’
For PCR(HBV-tg mouse)	oIMR0066	5’-ATGTACTGGTCCCGCATGGC-3’
	oIMR0067	5’-TTTGCAGGACTCCTACCGG-3’
	p27-XBP1s-F1	5’-GTTACCACTCCCCACTTGCTC-3’
	p27-XBP1s-R1	5’-TGAGGTGGGATCTTGCCTAATG-3’
	p27-XBP1s-F2	5’-TGTTACCACTCCCCACTTGCT-3’
	p27-XBP1s-R2	5’-GACATGAGAGAGCAGCCATACA-3’
	p27-XBP1s-F3	5’-CTTGCTCCGCCCTATCCACC-3’
For CHIP PCR	p27-XBP1s-R3	5’-GAAGACATGAGAGAGCAGCCAT-3’
	p27-ATF4-F1	5’-TTACCACTCCCCACTTGCTC-3’
	p27-ATF4-R1	5’-TGGCCTTTGAGAGAAGCCCT-3’
	p27-ATF4-F2	5’-CTCCTGTTACCACTCCCCACT-3’
	p27-ATF4-R2	5’-GAGAGAGCAGCCATACAGCTA-3’
	p27-ATF4-F3	5’-CCTGATGCTCCTGTTACCAC-3’
	p27-ATF4-R3	5’-AGAGAGCAGCCATACAGCTA-3’
	si-eIF3d-1	5’-CCCUAGAAUACUACGACAA-3’
For siRNA	si-eIF3d-2	5’-CGGAACAUGUUGCAGUUCA-3’
	si-eIF3d-3	5’-GUGGAAGUCAAUAUGCUUA-3’
