# Supplementary material for: Large HBV Surface Protein-Induced Unfolded Protein Response Dynamically Regulates p27 Degradation in Hepatocellular Carcinoma Progression
Source: Int J Mol Sci. 2023 Sep 7;24(18):13825. doi: 10.3390/ijms241813825 (PMC10530851; doi:10.3390/ijms241813825)
Supplement: Supplementary file 1 [file ijms-24-13825-s001.zip › Supplementary Table S2.xls]

Table S2. RNA-seq data
id	L1_fpkm	L2_fpkm	L3_fpkm	L4_fpkm	N1_fpkm	N2_fpkm	N3_fpkm	N4_fpkm	L1_count	L2_count	L3_count	L4_count	N1_count	N2_count	N3_count	N4_count	Symbol	Description	KEGG_A_class	KEGG_B_class	Pathway	K_ID	GO Component	GO Function	GO Process
ENSG00000000003	33.3	29.03	34.98	30.34	31.32	21.77	24.62	30.25	2357	2394	2601	2285	2570	2136	2221	2546	TSPAN6	tetraspanin 6 [Source:HGNC Symbol;Acc:HGNC:11858]	-	-	-	-	GO:0005887//integral component of plasma membrane;GO:0016020//membrane;GO:0016021//integral component of membrane;GO:0070062//extracellular exosome	GO:0005515//protein binding	GO:0039532//negative regulation of viral-induced cytoplasmic pattern recognition receptor signaling pathway;GO:0043123//positive regulation of I-kappaB kinase/NF-kappaB signaling;GO:1901223//negative regulation of NIK/NF-kappaB signaling
ENSG00000000005	0	0	0	0	0	0	0	0	0	0	0	0	0	0	0	0	TNMD	tenomodulin [Source:HGNC Symbol;Acc:HGNC:17757]	-	-	-	-	GO:0005634//nucleus;GO:0005635//nuclear envelope;GO:0005737//cytoplasm;GO:0016020//membrane;GO:0016021//integral component of membrane	GO:0005515//protein binding	GO:0001886//endothelial cell morphogenesis;GO:0001937//negative regulation of endothelial cell proliferation;GO:0016525//negative regulation of angiogenesis;GO:0030948//negative regulation of vascular endothelial growth factor receptor signaling pathway;GO:0035990//tendon cell differentiation;GO:0071773//cellular response to BMP stimulus
ENSG00000000419	98.13	83.65	83.2	83.32	70.38	57.39	64.83	74.19	2031	2118	2054	1894	1864	1620	1726	2023	DPM1	dolichyl-phosphate mannosyltransferase subunit 1, catalytic [Source:HGNC Symbol;Acc:HGNC:3005]	Metabolism;Metabolism	Global and overview maps;Glycan biosynthesis and metabolism	ko01100//Metabolic pathways;ko00510//N-Glycan biosynthesis	K00721;K00721	GO:0005634//nucleus;GO:0005783//endoplasmic reticulum;GO:0005789//endoplasmic reticulum membrane;GO:0016020//membrane;GO:0033185//dolichol-phosphate-mannose synthase complex;GO:0043231//intracellular membrane-bounded organelle	GO:0004169//dolichyl-phosphate-mannose-protein mannosyltransferase activity;GO:0004582//dolichyl-phosphate beta-D-mannosyltransferase activity;GO:0005515//protein binding;GO:0005537//mannose binding;GO:0016740//transferase activity;GO:0016757//transferase activity, transferring glycosyl groups;GO:0043178//alcohol binding	GO:0006486//protein glycosylation;GO:0006506//GPI anchor biosynthetic process;GO:0018279//protein N-linked glycosylation via asparagine;GO:0019348//dolichol metabolic process;GO:0019673//GDP-mannose metabolic process;GO:0035268//protein mannosylation;GO:0035269//protein O-linked mannosylation;GO:0097502//mannosylation
ENSG00000000457	1.61	1.33	1.5	1.45	1.79	1.52	1.54	1.59	115.17	116.13	117.7	116.33	160.36	123.11	143.71	150.2	SCYL3	SCY1 like pseudokinase 3 [Source:HGNC Symbol;Acc:HGNC:19285]	-	-	-	-	GO:0000139//Golgi membrane;GO:0005737//cytoplasm;GO:0005794//Golgi apparatus;GO:0030027//lamellipodium;GO:0042995//cell projection	GO:0004672//protein kinase activity;GO:0005515//protein binding;GO:0005524//ATP binding;GO:0042802//identical protein binding	GO:0006468//protein phosphorylation;GO:0006954//inflammatory response;GO:0016477//cell migration;GO:0021522//spinal cord motor neuron differentiation;GO:0034613//cellular protein localization;GO:0048666//neuron development
ENSG00000000460	15.03	12.29	11.06	12.33	10.47	9.9	9.76	10.11	581.83	605.87	611.3	602.67	540.64	489.89	521.29	574.8	C1orf112	chromosome 1 open reading frame 112 [Source:HGNC Symbol;Acc:HGNC:25565]	-	-	-	-	-	GO:0005515//protein binding	-
ENSG00000000938	0	0.04	0	0	0	0	0.04	0	0	2	0	0	0	0	1	0	FGR	FGR proto-oncogene, Src family tyrosine kinase [Source:HGNC Symbol;Acc:HGNC:3697]	Organismal Systems	Immune system	ko04062//Chemokine signaling pathway	K08891	GO:0005576//extracellular region;GO:0005737//cytoplasm;GO:0005739//mitochondrion;GO:0005743//mitochondrial inner membrane;GO:0005758//mitochondrial intermembrane space;GO:0005829//cytosol;GO:0005856//cytoskeleton;GO:0005886//plasma membrane;GO:0015629//actin cytoskeleton;GO:0016020//membrane;GO:0016235//aggresome;GO:0031234//extrinsic component of cytoplasmic side of plasma membrane;GO:0032587//r…	GO:0000166//nucleotide binding;GO:0001784//phosphotyrosine residue binding;GO:0004672//protein kinase activity;GO:0004713//protein tyrosine kinase activity;GO:0004715//non-membrane spanning protein tyrosine kinase activity;GO:0005102//signaling receptor binding;GO:0005515//protein binding;GO:0005524//ATP binding;GO:0016301//kinase activity;GO:0016740//transferase activity;GO:0019901//protein kina…	GO:0001819//positive regulation of cytokine production;GO:0002376//immune system process;GO:0002768//immune response-regulating cell surface receptor signaling pathway;GO:0006468//protein phosphorylation;GO:0007169//transmembrane receptor protein tyrosine kinase signaling pathway;GO:0007229//integrin-mediated signaling pathway;GO:0008360//regulation of cell shape;GO:0009615//response to virus;GO:…
ENSG00000000971	0	0.07	0.01	0.01	0.23	0.18	0.19	0.36	0	7	1	1	23	17	17	31	CFH	complement factor H [Source:HGNC Symbol;Acc:HGNC:4883]	Human Diseases;Organismal Systems	Infectious diseases;Immune system	ko05150//Staphylococcus aureus infection;ko04610//Complement and coagulation cascades	K04004;K04004	GO:0005576//extracellular region;GO:0005615//extracellular space;GO:0070062//extracellular exosome;GO:0072562//blood microparticle	GO:0005515//protein binding;GO:0008201//heparin binding;GO:0042802//identical protein binding;GO:0043395//heparan sulfate proteoglycan binding	GO:0002376//immune system process;GO:0006956//complement activation;GO:0006957//complement activation, alternative pathway;GO:0016032//viral process;GO:0030449//regulation of complement activation;GO:0045087//innate immune response;GO:1903659//regulation of complement-dependent cytotoxicity
ENSG00000001036	79.96	90.06	92.69	96.38	91.69	77.81	84.62	90.15	3693	5094	5111	4873	5425	4925	5040	5469	FUCA2	alpha-L-fucosidase 2 [Source:HGNC Symbol;Acc:HGNC:4008]	Cellular Processes;Metabolism	Transport and catabolism;Glycan biosynthesis and metabolism	ko04142//Lysosome;ko00511//Other glycan degradation	K01206;K01206	GO:0005576//extracellular region;GO:0005615//extracellular space;GO:0005764//lysosome;GO:0005788//endoplasmic reticulum lumen;GO:0035578//azurophil granule lumen;GO:0070062//extracellular exosome	GO:0004560//alpha-L-fucosidase activity;GO:0005515//protein binding;GO:0016787//hydrolase activity;GO:0016798//hydrolase activity, acting on glycosyl bonds	GO:0005975//carbohydrate metabolic process;GO:0006004//fucose metabolic process;GO:0008152//metabolic process;GO:0009617//response to bacterium;GO:0016139//glycoside catabolic process;GO:0043312//neutrophil degranulation;GO:0043687//post-translational protein modification;GO:0044267//cellular protein metabolic process;GO:2000535//regulation of entry of bacterium into host cell
ENSG00000001084	28.13	30.77	29.93	28.22	29.34	26.5	27.6	28.44	1602	2093	1977	1753	2021	1918	1891	2098	GCLC	glutamate-cysteine ligase catalytic subunit [Source:HGNC Symbol;Acc:HGNC:4311]	Metabolism;Metabolism;Metabolism;Cellular Processes	Global and overview maps;Metabolism of other amino acids;Amino acid metabolism;Cell growth and death	ko01100//Metabolic pathways;ko00480//Glutathione metabolism;ko00270//Cysteine and methionine metabolism;ko04216//Ferroptosis	K11204;K11204;K11204;K11204	GO:0005739//mitochondrion;GO:0005829//cytosol;GO:0017109//glutamate-cysteine ligase complex	GO:0000166//nucleotide binding;GO:0000287//magnesium ion binding;GO:0003824//catalytic activity;GO:0004357//glutamate-cysteine ligase activity;GO:0005515//protein binding;GO:0005524//ATP binding;GO:0016595//glutamate binding;GO:0016874//ligase activity;GO:0043531//ADP binding;GO:0044877//protein-containing complex binding	GO:0006534//cysteine metabolic process;GO:0006536//glutamate metabolic process;GO:0006749//glutathione metabolic process;GO:0006750//glutathione biosynthetic process;GO:0006979//response to oxidative stress;GO:0007568//aging;GO:0007584//response to nutrient;GO:0009408//response to heat;GO:0009410//response to xenobiotic stimulus;GO:0009725//response to hormone;GO:0014823//response to activity;GO:…
ENSG00000001167	21.88	22.05	22.14	20.77	16.5	17.92	17.45	17.16	1339	1508	1536	1330	1175	1274	1226	1284	NFYA	nuclear transcription factor Y subunit alpha [Source:HGNC Symbol;Acc:HGNC:7804]	Human Diseases;Human Diseases;Organismal Systems	Infectious diseases;Neurodegenerative disease;Immune system	ko05152//Tuberculosis;ko05017//Spinocerebellar ataxia;ko04612//Antigen processing and presentation	K08064;K08064;K08064	GO:0000785//chromatin;GO:0005634//nucleus;GO:0005654//nucleoplasm;GO:0016602//CCAAT-binding factor complex;GO:0032993//protein-DNA complex;GO:0090575//RNA polymerase II transcription factor complex	GO:0000976//transcription regulatory region sequence-specific DNA binding;GO:0000978//RNA polymerase II proximal promoter sequence-specific DNA binding;GO:0000981//DNA-binding transcription factor activity, RNA polymerase II-specific;GO:0003677//DNA binding;GO:0003700//DNA-binding transcription factor activity;GO:0005515//protein binding	GO:0006355//regulation of transcription, DNA-templated;GO:0006357//regulation of transcription by RNA polymerase II;GO:0006366//transcription by RNA polymerase II;GO:0045540//regulation of cholesterol biosynthetic process;GO:0045893//positive regulation of transcription, DNA-templated;GO:0048511//rhythmic process
ENSG00000001460	1.6	1.81	1.16	1.44	1.63	1.51	1.5	1.6	85	99	70	79	102	105	98	108	STPG1	sperm tail PG-rich repeat containing 1 [Source:HGNC Symbol;Acc:HGNC:28070]	-	-	-	-	GO:0005634//nucleus;GO:0005737//cytoplasm;GO:0005739//mitochondrion	GO:0003674//molecular_function	GO:0006915//apoptotic process;GO:0043065//positive regulation of apoptotic process;GO:1902110//positive regulation of mitochondrial membrane permeability involved in apoptotic process
ENSG00000001461	1.99	3.1	2.39	3.3	3.21	3.16	2.84	2.94	164	263	252	274	354	322	287	344	NIPAL3	NIPA like domain containing 3 [Source:HGNC Symbol;Acc:HGNC:25233]	-	-	-	-	GO:0016020//membrane;GO:0016021//integral component of membrane	GO:0005515//protein binding;GO:0015095//magnesium ion transmembrane transporter activity	GO:0015693//magnesium ion transport;GO:1903830//magnesium ion transmembrane transport
ENSG00000001497	13.81	18.74	19.35	19.98	18.32	16.49	17.27	17.46	668	1100	1113	1057	1126	1098	1076	1113	LAS1L	LAS1 like ribosome biogenesis factor [Source:HGNC Symbol;Acc:HGNC:25726]	-	-	-	-	GO:0005634//nucleus;GO:0005654//nucleoplasm;GO:0005730//nucleolus;GO:0005737//cytoplasm;GO:0016020//membrane;GO:0030687//preribosome, large subunit precursor;GO:0071339//MLL1 complex;GO:0090730//Las1 complex	GO:0003723//RNA binding;GO:0004519//endonuclease activity;GO:0005515//protein binding	GO:0000460//maturation of 5.8S rRNA;GO:0000470//maturation of LSU-rRNA;GO:0006364//rRNA processing;GO:0090305//nucleic acid phosphodiester bond hydrolysis
ENSG00000001561	0	0.01	0	0	0.02	0.02	0	0	0	1	0	0	2	2	0	0	ENPP4	ectonucleotide pyrophosphatase/phosphodiesterase 4 [Source:HGNC Symbol;Acc:HGNC:3359]	Metabolism;Metabolism	Global and overview maps;Nucleotide metabolism	ko01100//Metabolic pathways;ko00230//Purine metabolism	K18424;K18424	GO:0005886//plasma membrane;GO:0016020//membrane;GO:0016021//integral component of membrane;GO:0070062//extracellular exosome;GO:0101003//ficolin-1-rich granule membrane	GO:0003824//catalytic activity;GO:0005515//protein binding;GO:0016787//hydrolase activity;GO:0046872//metal ion binding;GO:0047710//bis(5'-adenosyl)-triphosphatase activity	GO:0007596//blood coagulation;GO:0007599//hemostasis;GO:0030194//positive regulation of blood coagulation;GO:0043312//neutrophil degranulation;GO:0046130//purine ribonucleoside catabolic process
ENSG00000001617	7.72	10.47	10.77	11.99	12.48	10.74	11.69	12.21	404	710	707	719	849	834	819	873	SEMA3F	semaphorin 3F [Source:HGNC Symbol;Acc:HGNC:10728]	Organismal Systems	Development	ko04360//Axon guidance	K06840	GO:0005576//extracellular region;GO:0005615//extracellular space;GO:0005887//integral component of plasma membrane;GO:0098978//glutamatergic synapse	GO:0005515//protein binding;GO:0030215//semaphorin receptor binding;GO:0045499//chemorepellent activity	GO:0001755//neural crest cell migration;GO:0007411//axon guidance;GO:0021612//facial nerve structural organization;GO:0021637//trigeminal nerve structural organization;GO:0021675//nerve development;GO:0021785//branchiomotor neuron axon guidance;GO:0030335//positive regulation of cell migration;GO:0036486//ventral trunk neural crest cell migration;GO:0048843//negative regulation of axon extension …
ENSG00000001626	0	0	0	0	0	0	0	0	0	0	0	0	0	0	0	0	CFTR	CF transmembrane conductance regulator [Source:HGNC Symbol;Acc:HGNC:1884]	Environmental Information Processing;Cellular Processes;Environmental Information Processing;Organismal Systems;Organismal Systems;Organismal Systems;Human Diseases;Environmental Information Processing	Signal transduction;Cellular community - eukaryotes;Signal transduction;Digestive system;Digestive system;Digestive system;Infectious diseases;Membrane transport	ko04024//cAMP signaling pathway;ko04530//Tight junction;ko04152//AMPK signaling pathway;ko04972//Pancreatic secretion;ko04971//Gastric acid secretion;ko04976//Bile secretion;ko05110//Vibrio cholerae infection;ko02010//ABC transporters	K05031;K05031;K05031;K05031;K05031;K05031;K05031;K05031	GO:0005634//nucleus;GO:0005737//cytoplasm;GO:0005765//lysosomal membrane;GO:0005768//endosome;GO:0005769//early endosome;GO:0005783//endoplasmic reticulum;GO:0005789//endoplasmic reticulum membrane;GO:0005829//cytosol;GO:0005886//plasma membrane;GO:0005887//integral component of plasma membrane;GO:0009986//cell surface;GO:0010008//endosome membrane;GO:0016020//membrane;GO:0016021//integral compon…	GO:0000166//nucleotide binding;GO:0005254//chloride channel activity;GO:0005260//intracellularly ATP-gated chloride channel activity;GO:0005515//protein binding;GO:0005524//ATP binding;GO:0015106//bicarbonate transmembrane transporter activity;GO:0015108//chloride transmembrane transporter activity;GO:0016853//isomerase activity;GO:0016887//ATPase activity;GO:0017081//chloride channel regulator a…	GO:0006695//cholesterol biosynthetic process;GO:0006811//ion transport;GO:0006821//chloride transport;GO:0006904//vesicle docking involved in exocytosis;GO:0015701//bicarbonate transport;GO:0016579//protein deubiquitination;GO:0030301//cholesterol transport;GO:0034976//response to endoplasmic reticulum stress;GO:0035377//transepithelial water transport;GO:0035774//positive regulation of insulin s…
ENSG00000001629	9.83	12.41	12.42	10.24	10.88	12.2	14.24	11.1	1021	1220	1100	1101	1075.97	1206	1113	1112	ANKIB1	ankyrin repeat and IBR domain containing 1 [Source:HGNC Symbol;Acc:HGNC:22215]	-	-	-	-	GO:0000151//ubiquitin ligase complex;GO:0005737//cytoplasm	GO:0004842//ubiquitin-protein transferase activity;GO:0005515//protein binding;GO:0016740//transferase activity;GO:0031624//ubiquitin conjugating enzyme binding;GO:0046872//metal ion binding;GO:0061630//ubiquitin protein ligase activity	GO:0000209//protein polyubiquitination;GO:0006511//ubiquitin-dependent protein catabolic process;GO:0016567//protein ubiquitination;GO:0032436//positive regulation of proteasomal ubiquitin-dependent protein catabolic process
ENSG00000001630	85.43	74.16	74.76	74.99	69.54	58.65	66.38	71.54	4819	5214	5148.97	4687	4920	4586	4857	5409	CYP51A1	cytochrome P450 family 51 subfamily A member 1 [Source:HGNC Symbol;Acc:HGNC:2649]	Metabolism;Metabolism	Global and overview maps;Lipid metabolism	ko01100//Metabolic pathways;ko00100//Steroid biosynthesis	K05917;K05917	GO:0005783//endoplasmic reticulum;GO:0005789//endoplasmic reticulum membrane;GO:0016020//membrane;GO:0016021//integral component of membrane;GO:0031090//organelle membrane;GO:0043231//intracellular membrane-bounded organelle	GO:0004497//monooxygenase activity;GO:0005506//iron ion binding;GO:0008398//sterol 14-demethylase activity;GO:0016491//oxidoreductase activity;GO:0016705//oxidoreductase activity, acting on paired donors, with incorporation or reduction of molecular oxygen;GO:0020037//heme binding;GO:0046872//metal ion binding	GO:0006629//lipid metabolic process;GO:0006694//steroid biosynthetic process;GO:0006695//cholesterol biosynthetic process;GO:0008202//steroid metabolic process;GO:0008203//cholesterol metabolic process;GO:0016125//sterol metabolic process;GO:0016126//sterol biosynthetic process;GO:0033488//cholesterol biosynthetic process via 24,25-dihydrolanosterol;GO:0042177//negative regulation of protein cata…
ENSG00000001631	13.48	9.67	8.21	9.87	7.62	6.97	7.77	7.5	613.88	661.48	557.54	599.91	451.86	486.5	509.16	541.16	KRIT1	KRIT1 ankyrin repeat containing [Source:HGNC Symbol;Acc:HGNC:1573]	Environmental Information Processing	Signal transduction	ko04015//Rap1 signaling pathway	K17705	GO:0005615//extracellular space;GO:0005737//cytoplasm;GO:0005856//cytoskeleton;GO:0005886//plasma membrane;GO:0005911//cell-cell junction;GO:0016020//membrane;GO:0030054//cell junction	GO:0005515//protein binding;GO:0005546//phosphatidylinositol-4,5-bisphosphate binding;GO:0008017//microtubule binding;GO:0030695//GTPase regulator activity	GO:0001525//angiogenesis;GO:0001937//negative regulation of endothelial cell proliferation;GO:0007264//small GTPase mediated signal transduction;GO:0010596//negative regulation of endothelial cell migration;GO:0016525//negative regulation of angiogenesis;GO:0045454//cell redox homeostasis;GO:0050790//regulation of catalytic activity;GO:2000114//regulation of establishment of cell polarity;GO:2000…
ENSG00000002016	3.4	4.72	4.48	5.31	5.52	4.06	4.77	4.47	154	226	212	224	240	214	223	231	RAD52	RAD52 homolog, DNA repair protein [Source:HGNC Symbol;Acc:HGNC:9824]	Genetic Information Processing	Replication and repair	ko03440//Homologous recombination	K10873	GO:0005634//nucleus;GO:0005654//nucleoplasm;GO:0032991//protein-containing complex;GO:0032993//protein-DNA complex	GO:0003677//DNA binding;GO:0003697//single-stranded DNA binding;GO:0005515//protein binding;GO:0042802//identical protein binding	GO:0000724//double-strand break repair via homologous recombination;GO:0000730//DNA recombinase assembly;GO:0006281//DNA repair;GO:0006302//double-strand break repair;GO:0006310//DNA recombination;GO:0006312//mitotic recombination;GO:0006974//cellular response to DNA damage stimulus;GO:0010792//DNA double-strand break processing involved in repair via single-strand annealing;GO:0034599//cellular …
ENSG00000002330	5.21	9.61	7.8	9.97	10.91	8.26	9.44	9.7	97.94	223.89	182.73	205.93	249.9	217.87	231.93	222.71	BAD	BCL2 associated agonist of cell death [Source:HGNC Symbol;Acc:HGNC:936]	Human Diseases;Human Diseases;Environmental Information Processing;Human Diseases;Human Diseases;Human Diseases;Environmental Information Processing;Human Diseases;Environmental Information Processing;Human Diseases;Cellular Processes;Organismal Systems;Environmental Information Processing;Human Diseases;Human Diseases;Human Diseases;Human Diseases;Cellular Processes;Organismal Systems;Cellular P…	Infectious diseases;Cancers;Signal transduction;Neurodegenerative diseases;Infectious diseases;Infectious diseases;Signal transduction;Infectious disease: viral;Signal transduction;Cancers;Cellular community - eukaryotes;Immune system;Signal transduction;Cancers;Infectious diseases;Infectious diseases;Infectious diseases;Transport and catabolism;Endocrine system;Cell growth and death;Endocrine sy…	ko05168//Herpes simplex infection;ko05200//Pathways in cancer;ko04151//PI3K-Akt signaling pathway;ko05010//Alzheimer disease;ko05165//Human papillomavirus infection;ko05152//Tuberculosis;ko04014//Ras signaling pathway;ko05170//Human immunodeficiency virus 1 infection;ko04024//cAMP signaling pathway;ko05203//Viral carcinogenesis;ko04510//Focal adhesion;ko04062//Chemokine signaling pathway;ko04022/…	K02158;K02158;K02158;K02158;K02158;K02158;K02158;K02158;K02158;K02158;K02158;K02158;K02158;K02158;K02158;K02158;K02158;K02158;K02158;K02158;K02158;K02158;K02158;K02158;K02158;K02158;K02158;K02158;K02158;K02158;K02158;K02158;K02158;K02158;K02158;K02158;K02158;K02158	GO:0005737//cytoplasm;GO:0005739//mitochondrion;GO:0005741//mitochondrial outer membrane;GO:0005829//cytosol;GO:0016020//membrane	GO:0005515//protein binding;GO:0005543//phospholipid binding;GO:0008289//lipid binding;GO:0008656//cysteine-type endopeptidase activator activity involved in apoptotic process;GO:0019901//protein kinase binding;GO:0019903//protein phosphatase binding;GO:0030346//protein phosphatase 2B binding;GO:0043422//protein kinase B binding;GO:0071889//14-3-3 protein binding	GO:0001666//response to hypoxia;GO:0001836//release of cytochrome c from mitochondria;GO:0001844//protein insertion into mitochondrial membrane involved in apoptotic signaling pathway;GO:0006007//glucose catabolic process;GO:0006915//apoptotic process;GO:0006919//activation of cysteine-type endopeptidase activity involved in apoptotic process;GO:0007283//spermatogenesis;GO:0008283//cell prolifera…
ENSG00000002549	45.2	50.63	52.52	49.75	49.34	43.35	47.03	50.58	1701	2351	2379	2077	2399	2264	2304	2528	LAP3	leucine aminopeptidase 3 [Source:HGNC Symbol;Acc:HGNC:18449]	Metabolism;Metabolism;Metabolism	Global and overview maps;Metabolism of other amino acids;Amino acid metabolism	ko01100//Metabolic pathways;ko00480//Glutathione metabolism;ko00330//Arginine and proline metabolism	K11142;K11142;K11142	GO:0005634//nucleus;GO:0005654//nucleoplasm;GO:0005737//cytoplasm;GO:0005802//trans-Golgi network;GO:0005829//cytosol;GO:0005925//focal adhesion;GO:0030496//midbody;GO:0070062//extracellular exosome	GO:0004177//aminopeptidase activity;GO:0005515//protein binding;GO:0008233//peptidase activity;GO:0008235//metalloexopeptidase activity;GO:0016787//hydrolase activity;GO:0030145//manganese ion binding;GO:0046872//metal ion binding;GO:0070006//metalloaminopeptidase activity	GO:0006508//proteolysis;GO:0019538//protein metabolic process
ENSG00000002586	79.4	95.93	100.9	96.46	109.25	101.69	105.87	103.82	1778	2576	2667	2349	3082	3120	3009	3019	CD99	CD99 molecule (Xg blood group) [Source:HGNC Symbol;Acc:HGNC:7082]	Environmental Information Processing;Organismal Systems	Signaling molecules and interaction;Immune system	ko04514//Cell adhesion molecules (CAMs);ko04670//Leukocyte transendothelial migration	K06520;K06520	GO:0005737//cytoplasm;GO:0005886//plasma membrane;GO:0005887//integral component of plasma membrane;GO:0005925//focal adhesion;GO:0016020//membrane;GO:0016021//integral component of membrane	GO:0005515//protein binding	GO:0007155//cell adhesion;GO:0034109//homotypic cell-cell adhesion;GO:0050776//regulation of immune response;GO:0072683//T cell extravasation;GO:2000391//positive regulation of neutrophil extravasation
ENSG00000002587	0	0.01	0.01	0	0	0	0.01	0	0	1	1	0	0	0	1	0	HS3ST1	heparan sulfate-glucosamine 3-sulfotransferase 1 [Source:HGNC Symbol;Acc:HGNC:5194]	Metabolism	Glycan biosynthesis and metabolism	ko00534//Glycosaminoglycan biosynthesis - heparan sulfate / heparin	K01024	GO:0005794//Golgi apparatus;GO:0005796//Golgi lumen	GO:0008146//sulfotransferase activity;GO:0008467//[heparan sulfate]-glucosamine 3-sulfotransferase 1 activity;GO:0016740//transferase activity	GO:0006024//glycosaminoglycan biosynthetic process
ENSG00000002726	0	0	0	0	0	0	0	0	0	0	0	0	0	0	0	0	AOC1	amine oxidase copper containing 1 [Source:HGNC Symbol;Acc:HGNC:80]	Metabolism;Metabolism;Metabolism;Metabolism	Global and overview maps;Amino acid metabolism;Amino acid metabolism;Amino acid metabolism	ko01100//Metabolic pathways;ko00330//Arginine and proline metabolism;ko00380//Tryptophan metabolism;ko00340//Histidine metabolism	K11182;K11182;K11182;K11182	GO:0005576//extracellular region;GO:0005615//extracellular space;GO:0005777//peroxisome;GO:0005886//plasma membrane;GO:0005923//bicellular tight junction;GO:0035580//specific granule lumen;GO:0070062//extracellular exosome	GO:0005507//copper ion binding;GO:0005509//calcium ion binding;GO:0005515//protein binding;GO:0008131//primary amine oxidase activity;GO:0008201//heparin binding;GO:0008270//zinc ion binding;GO:0016491//oxidoreductase activity;GO:0042803//protein homodimerization activity;GO:0044877//protein-containing complex binding;GO:0046872//metal ion binding;GO:0048038//quinone binding;GO:0052597//diamine o…	GO:0006805//xenobiotic metabolic process;GO:0009308//amine metabolic process;GO:0009445//putrescine metabolic process;GO:0035874//cellular response to copper ion starvation;GO:0043312//neutrophil degranulation;GO:0046677//response to antibiotic;GO:0055114//oxidation-reduction process;GO:0071280//cellular response to copper ion;GO:0071420//cellular response to histamine;GO:0071504//cellular respon…
ENSG00000002745	0	0	0	0.04	0	0	0	0	0	0	0	1	0	0	0	0	WNT16	Wnt family member 16 [Source:HGNC Symbol;Acc:HGNC:16267]	Human Diseases;Human Diseases;Human Diseases;Human Diseases;Human Diseases;Human Diseases;Environmental Information Processing;Environmental Information Processing;Human Diseases;Environmental Information Processing;Human Diseases;Human Diseases;Cellular Processes;Organismal Systems;Human Diseases	Cancers;Neurodegenerative diseases;Infectious diseases;Cancers;Cancers;Cancers;Signal transduction;Signal transduction;Endocrine and metabolic diseases;Signal transduction;Cancers;Cancers;Cellular community - eukaryotes;Endocrine system;Cancers	ko05200//Pathways in cancer;ko05010//Alzheimer disease;ko05165//Human papillomavirus infection;ko05202//Transcriptional misregulation in cancers;ko05205//Proteoglycans in cancer;ko05225//Hepatocellular carcinoma;ko04310//Wnt signaling pathway;ko04150//mTOR signaling pathway;ko04934//Cushing syndrome;ko04390//Hippo signaling pathway;ko05224//Breast cancer;ko05226//Gastric cancer;ko04550//Signaling…	K01558;K01558;K01558;K01558;K01558;K01558;K01558;K01558;K01558;K01558;K01558;K01558;K01558;K01558;K01558	GO:0005576//extracellular region;GO:0005615//extracellular space;GO:0005737//cytoplasm	GO:0005102//signaling receptor binding;GO:0005109//frizzled binding;GO:0005125//cytokine activity	GO:0003408//optic cup formation involved in camera-type eye development;GO:0007275//multicellular organism development;GO:0010628//positive regulation of gene expression;GO:0014068//positive regulation of phosphatidylinositol 3-kinase signaling;GO:0016055//Wnt signaling pathway;GO:0030182//neuron differentiation;GO:0030216//keratinocyte differentiation;GO:0043616//keratinocyte proliferation;GO:00…
ENSG00000002746	0	0.01	0	0	0.02	0	0	0	0	1	0	0	2	0	0	0	HECW1	HECT, C2 and WW domain containing E3 ubiquitin protein ligase 1 [Source:HGNC Symbol;Acc:HGNC:22195]	-	-	-	-	GO:0005737//cytoplasm;GO:0005829//cytosol	GO:0004842//ubiquitin-protein transferase activity;GO:0005515//protein binding;GO:0016740//transferase activity;GO:0061630//ubiquitin protein ligase activity	GO:0000209//protein polyubiquitination;GO:0016567//protein ubiquitination;GO:0043161//proteasome-mediated ubiquitin-dependent protein catabolic process;GO:0045732//positive regulation of protein catabolic process;GO:0048814//regulation of dendrite morphogenesis;GO:0090090//negative regulation of canonical Wnt signaling pathway;GO:2000650//negative regulation of sodium ion transmembrane transporte…
ENSG00000002822	8.11	18.92	19.09	17.03	19	19.99	17.62	16.51	400	1154.12	1039.39	977.31	1233.08	1290.29	1118.2	1054.16	MAD1L1	mitotic arrest deficient 1 like 1 [Source:HGNC Symbol;Acc:HGNC:6762]	Human Diseases;Human Diseases;Cellular Processes;Cellular Processes;Organismal Systems	Infectious diseases;Cancers;Cell growth and death;Cell growth and death;Endocrine system	ko05166//HTLV-I infection;ko05203//Viral carcinogenesis;ko04114//Oocyte meiosis;ko04110//Cell cycle;ko04914//Progesterone-mediated oocyte maturation	K06679;K06679;K06679;K06679;K06679	GO:0000775//chromosome, centromeric region;GO:0000776//kinetochore;GO:0000777//condensed chromosome kinetochore;GO:0000922//spindle pole;GO:0005634//nucleus;GO:0005635//nuclear envelope;GO:0005694//chromosome;GO:0005737//cytoplasm;GO:0005813//centrosome;GO:0005815//microtubule organizing center;GO:0005819//spindle;GO:0005829//cytosol;GO:0005856//cytoskeleton;GO:0044615//nuclear pore nuclear baske…	GO:0005515//protein binding;GO:0042802//identical protein binding;GO:0043515//kinetochore binding	GO:0007049//cell cycle;GO:0007094//mitotic spindle assembly checkpoint;GO:0042130//negative regulation of T cell proliferation;GO:0048538//thymus development;GO:0051301//cell division;GO:0051315//attachment of mitotic spindle microtubules to kinetochore;GO:0090235//regulation of metaphase plate congression;GO:1901990//regulation of mitotic cell cycle phase transition
ENSG00000002834	77.24	97	94.36	96.9	90.01	87.71	90.61	86.03	5890	9053	8599	8131	8767	8923	8856	8649	LASP1	LIM and SH3 protein 1 [Source:HGNC Symbol;Acc:HGNC:6513]	-	-	-	-	GO:0005737//cytoplasm;GO:0005856//cytoskeleton;GO:0005925//focal adhesion;GO:0005938//cell cortex;GO:0030864//cortical actin cytoskeleton	GO:0003779//actin binding;GO:0005515//protein binding;GO:0015075//ion transmembrane transporter activity;GO:0045296//cadherin binding;GO:0046872//metal ion binding;GO:0051015//actin filament binding	GO:0006811//ion transport;GO:0034220//ion transmembrane transport
ENSG00000002919	5.25	8.35	8.88	6.61	8.08	5.86	7.5	7.98	182	301	353	289	342	255	300	327	SNX11	sorting nexin 11 [Source:HGNC Symbol;Acc:HGNC:14975]	-	-	-	-	GO:0005768//endosome;GO:0016020//membrane	GO:0005515//protein binding;GO:0008289//lipid binding;GO:0035091//phosphatidylinositol binding;GO:1901981//phosphatidylinositol phosphate binding	GO:0006886//intracellular protein transport;GO:0015031//protein transport;GO:0016050//vesicle organization
ENSG00000002933	0	0	0	0	0	0	0	0	0	0	0	0	0	0	0	0	TMEM176A	transmembrane protein 176A [Source:HGNC Symbol;Acc:HGNC:24930]	-	-	-	-	GO:0016020//membrane;GO:0016021//integral component of membrane	GO:0005515//protein binding	GO:2001199//negative regulation of dendritic cell differentiation
ENSG00000003056	75.51	58.53	58.75	63.67	54.07	52.9	51.64	49.48	2639.56	3123.27	3092.96	2933.65	2808.11	2762.29	2820.61	2914.48	M6PR	mannose-6-phosphate receptor, cation dependent [Source:HGNC Symbol;Acc:HGNC:6752]	Cellular Processes;Human Diseases;Cellular Processes	Transport and catabolism;Infectious diseases;Transport and catabolism	ko04145//Phagosome;ko05132//Salmonella infection;ko04142//Lysosome	K10089;K10089;K10089	GO:0005764//lysosome;GO:0005765//lysosomal membrane;GO:0005768//endosome;GO:0005770//late endosome;GO:0005794//Golgi apparatus;GO:0005802//trans-Golgi network;GO:0005886//plasma membrane;GO:0005887//integral component of plasma membrane;GO:0016020//membrane;GO:0016021//integral component of membrane;GO:0030133//transport vesicle;GO:0030665//clathrin-coated vesicle membrane;GO:0032588//trans-Golgi…	GO:0004888//transmembrane signaling receptor activity;GO:0005515//protein binding;GO:0019904//protein domain specific binding;GO:1905394//retromer complex binding	GO:0006622//protein targeting to lysosome;GO:0006898//receptor-mediated endocytosis;GO:0007041//lysosomal transport;GO:0008333//endosome to lysosome transport;GO:0033299//secretion of lysosomal enzymes;GO:0061024//membrane organization
ENSG00000003096	0.12	0.05	0.12	0.08	0.14	0.1	0.1	0.25	7	4	9	5	9	7	8	17	KLHL13	kelch like family member 13 [Source:HGNC Symbol;Acc:HGNC:22931]	Genetic Information Processing	Folding, sorting and degradation	ko04120//Ubiquitin mediated proteolysis	K10447	GO:0005829//cytosol;GO:0030496//midbody;GO:0031463//Cul3-RING ubiquitin ligase complex	GO:0004842//ubiquitin-protein transferase activity;GO:0005515//protein binding;GO:0047485//protein N-terminus binding;GO:0097602//cullin family protein binding	GO:0007049//cell cycle;GO:0016567//protein ubiquitination;GO:0032465//regulation of cytokinesis;GO:0043687//post-translational protein modification;GO:0051301//cell division
ENSG00000003137	0.08	0.07	0.17	0.07	0.14	0.07	0.08	0.19	6	7	7	6	14	8	8	10	CYP26B1	cytochrome P450 family 26 subfamily B member 1 [Source:HGNC Symbol;Acc:HGNC:20581]	Metabolism;Metabolism	Global and overview maps;Metabolism of cofactors and vitamins	ko01100//Metabolic pathways;ko00830//Retinol metabolism	K12664;K12664	GO:0005737//cytoplasm;GO:0005783//endoplasmic reticulum;GO:0005789//endoplasmic reticulum membrane;GO:0016020//membrane;GO:0031090//organelle membrane;GO:0043231//intracellular membrane-bounded organelle	GO:0001972//retinoic acid binding;GO:0004497//monooxygenase activity;GO:0005506//iron ion binding;GO:0005515//protein binding;GO:0008401//retinoic acid 4-hydroxylase activity;GO:0016491//oxidoreductase activity;GO:0016705//oxidoreductase activity, acting on paired donors, with incorporation or reduction of molecular oxygen;GO:0016709//oxidoreductase activity, acting on paired donors, with incorpo…	GO:0001709//cell fate determination;GO:0001768//establishment of T cell polarity;GO:0001822//kidney development;GO:0006766//vitamin metabolic process;GO:0006805//xenobiotic metabolic process;GO:0006954//inflammatory response;GO:0007140//male meiotic nuclear division;GO:0007283//spermatogenesis;GO:0009954//proximal/distal pattern formation;GO:0010628//positive regulation of gene expression;GO:0016…
ENSG00000003147	0	0	0.02	0.09	0.07	0.04	0	0.03	0	0	1	1	1	2	0	1	ICA1	islet cell autoantigen 1 [Source:HGNC Symbol;Acc:HGNC:5343]	Human Diseases	Endocrine and metabolic diseases	ko04940//Type I diabetes mellitus	K19863	GO:0000139//Golgi membrane;GO:0005737//cytoplasm;GO:0005794//Golgi apparatus;GO:0005829//cytosol;GO:0016020//membrane;GO:0016021//integral component of membrane;GO:0030054//cell junction;GO:0030658//transport vesicle membrane;GO:0030667//secretory granule membrane;GO:0030672//synaptic vesicle membrane;GO:0031410//cytoplasmic vesicle;GO:0043231//intracellular membrane-bounded organelle;GO:0045202/…	GO:0005515//protein binding;GO:0019904//protein domain specific binding;GO:0140090//membrane curvature sensor activity	GO:0006836//neurotransmitter transport;GO:0050796//regulation of insulin secretion;GO:0051049//regulation of transport
ENSG00000003249	15.22	18	16.78	16.57	18.97	19.85	19.58	18.03	588	878	806	734	977	1077	1015	957	DBNDD1	dysbindin domain containing 1 [Source:HGNC Symbol;Acc:HGNC:28455]	-	-	-	-	GO:0005737//cytoplasm	-	GO:0006469//negative regulation of protein kinase activity
ENSG00000003393	8.18	8.46	8.58	8.05	8.58	7.34	7.88	9.06	901	1165	1100	982	1204	1154	1165	1236	ALS2	alsin Rho guanine nucleotide exchange factor ALS2 [Source:HGNC Symbol;Acc:HGNC:443]	Human Diseases	Neurodegenerative diseases	ko05014//Amyotrophic lateral sclerosis (ALS)	K04575	GO:0001726//ruffle;GO:0005634//nucleus;GO:0005737//cytoplasm;GO:0005769//early endosome;GO:0005813//centrosome;GO:0005829//cytosol;GO:0014069//postsynaptic density;GO:0016020//membrane;GO:0030027//lamellipodium;GO:0030424//axon;GO:0030425//dendrite;GO:0030426//growth cone;GO:0031982//vesicle;GO:0032991//protein-containing complex;GO:0043005//neuron projection;GO:0043025//neuronal cell body;GO:004…	GO:0005085//guanyl-nucleotide exchange factor activity;GO:0005096//GTPase activator activity;GO:0005515//protein binding;GO:0031267//small GTPase binding;GO:0042802//identical protein binding;GO:0042803//protein homodimerization activity;GO:0043539//protein serine/threonine kinase activator activity	GO:0001662//behavioral fear response;GO:0001701//in utero embryonic development;GO:0001881//receptor recycling;GO:0006979//response to oxidative stress;GO:0007032//endosome organization;GO:0007041//lysosomal transport;GO:0007409//axonogenesis;GO:0007528//neuromuscular junction development;GO:0007626//locomotory behavior;GO:0008104//protein localization;GO:0008219//cell death;GO:0016050//vesicle o…
ENSG00000003400	7.2	7.61	8.16	8.28	8.74	8.22	8.64	8.77	574	759	767	679	876	805	860	891	CASP10	caspase 10 [Source:HGNC Symbol;Acc:HGNC:1500]	Human Diseases;Human Diseases;Cellular Processes;Environmental Information Processing;Organismal Systems	Infectious diseases;Infectious diseases;Cell growth and death;Signal transduction;Immune system	ko05152//Tuberculosis;ko05161//Hepatitis B;ko04210//Apoptosis;ko04668//TNF signaling pathway;ko04622//RIG-I-like receptor signaling pathway	K04400;K04400;K04400;K04400;K04400	GO:0005737//cytoplasm;GO:0005829//cytosol;GO:0031265//CD95 death-inducing signaling complex;GO:0097342//ripoptosome	GO:0004197//cysteine-type endopeptidase activity;GO:0005515//protein binding;GO:0008233//peptidase activity;GO:0008234//cysteine-type peptidase activity;GO:0016787//hydrolase activity;GO:0031625//ubiquitin protein ligase binding;GO:0035877//death effector domain binding;GO:0097153//cysteine-type endopeptidase activity involved in apoptotic process;GO:0097199//cysteine-type endopeptidase activity …	GO:0006508//proteolysis;GO:0006915//apoptotic process;GO:0006919//activation of cysteine-type endopeptidase activity involved in apoptotic process;GO:0007166//cell surface receptor signaling pathway;GO:0042981//regulation of apoptotic process;GO:0043123//positive regulation of I-kappaB kinase/NF-kappaB signaling;GO:0097190//apoptotic signaling pathway;GO:0097194//execution phase of apoptosis
ENSG00000003402	23.68	26.56	30.54	27.87	28	20.37	24.52	27.7	1398.58	1705.32	1781.44	1625.64	1739.67	1728.39	1710.52	1853.53	CFLAR	CASP8 and FADD like apoptosis regulator [Source:HGNC Symbol;Acc:HGNC:1876]	Environmental Information Processing;Cellular Processes;Human Diseases;Cellular Processes;Cellular Processes;Environmental Information Processing;Human Diseases	Signal transduction;Cell growth and death;Infectious diseases;Transport and catabolism;Cell growth and death;Signal transduction;Infectious diseases	ko04064//NF-kappa B signaling pathway;ko04217//Necroptosis;ko05160//Hepatitis C;ko04140//Autophagy - animal;ko04210//Apoptosis;ko04668//TNF signaling pathway;ko05142//Chagas disease (American trypanosomiasis)	K04724;K04724;K04724;K04724;K04724;K04724;K04724	GO:0005737//cytoplasm;GO:0005829//cytosol;GO:0031264//death-inducing signaling complex;GO:0031265//CD95 death-inducing signaling complex;GO:0045121//membrane raft;GO:0097342//ripoptosome	GO:0002020//protease binding;GO:0004197//cysteine-type endopeptidase activity;GO:0005123//death receptor binding;GO:0005515//protein binding;GO:0008047//enzyme activator activity;GO:0008234//cysteine-type peptidase activity;GO:0044877//protein-containing complex binding;GO:0097153//cysteine-type endopeptidase activity involved in apoptotic process;GO:0097199//cysteine-type endopeptidase activity …	GO:0001666//response to hypoxia;GO:0006508//proteolysis;GO:0006915//apoptotic process;GO:0006919//activation of cysteine-type endopeptidase activity involved in apoptotic process;GO:0007519//skeletal muscle tissue development;GO:0010667//negative regulation of cardiac muscle cell apoptotic process;GO:0010952//positive regulation of peptidase activity;GO:0010976//positive regulation of neuron proj…
ENSG00000003436	127.75	125.02	118.15	120.1	151.8	156.35	161.94	163.08	5233	5796	5387	5015	7006	7215	7313	7896	TFPI	tissue factor pathway inhibitor [Source:HGNC Symbol;Acc:HGNC:11760]	Organismal Systems	Immune system	ko04610//Complement and coagulation cascades	K03909	GO:0005576//extracellular region;GO:0005615//extracellular space;GO:0005783//endoplasmic reticulum;GO:0005886//plasma membrane;GO:0005901//caveola;GO:0009986//cell surface;GO:0016020//membrane;GO:0031090//organelle membrane;GO:0031225//anchored component of membrane;GO:0043231//intracellular membrane-bounded organelle	GO:0004866//endopeptidase inhibitor activity;GO:0004867//serine-type endopeptidase inhibitor activity;GO:0030414//peptidase inhibitor activity	GO:0007596//blood coagulation;GO:0007598//blood coagulation, extrinsic pathway;GO:0007599//hemostasis;GO:0010466//negative regulation of peptidase activity;GO:0010951//negative regulation of endopeptidase activity;GO:0030195//negative regulation of blood coagulation;GO:0032355//response to estradiol;GO:0032496//response to lipopolysaccharide;GO:0071222//cellular response to lipopolysaccharide;GO:…
ENSG00000003509	11.16	12.49	12.6	12.98	12.9	10.78	12.68	14.18	436.05	516.57	521.2	475.72	540.05	517.21	563.27	606.88	NDUFAF7	NADH:ubiquinone oxidoreductase complex assembly factor 7 [Source:HGNC Symbol;Acc:HGNC:28816]	Organismal Systems	Environmental adaptation	ko04714//Thermogenesis	K18164	GO:0005615//extracellular space;GO:0005739//mitochondrion;GO:0005759//mitochondrial matrix	GO:0005515//protein binding;GO:0008168//methyltransferase activity;GO:0016740//transferase activity;GO:0019899//enzyme binding;GO:0035243//protein-arginine omega-N symmetric methyltransferase activity	GO:0019918//peptidyl-arginine methylation, to symmetrical-dimethyl arginine;GO:0032259//methylation;GO:0032981//mitochondrial respiratory chain complex I assembly
ENSG00000003756	20.6	35.46	29.86	30.88	28.44	32.54	31.82	27	1203.71	1824	1756	1531	1936	1907	1866	1924	RBM5	RNA binding motif protein 5 [Source:HGNC Symbol;Acc:HGNC:9902]	-	-	-	-	GO:0005634//nucleus;GO:0005654//nucleoplasm;GO:0005681//spliceosomal complex	GO:0003676//nucleic acid binding;GO:0003677//DNA binding;GO:0003723//RNA binding;GO:0003729//mRNA binding;GO:0005515//protein binding;GO:0046872//metal ion binding	GO:0000245//spliceosomal complex assembly;GO:0000381//regulation of alternative mRNA splicing, via spliceosome;GO:0000398//mRNA splicing, via spliceosome;GO:0006396//RNA processing;GO:0006397//mRNA processing;GO:0006915//apoptotic process;GO:0008285//negative regulation of cell proliferation;GO:0008380//RNA splicing;GO:0042981//regulation of apoptotic process;GO:0043065//positive regulation of ap…
ENSG00000003987	0.38	0.46	0.33	0.39	0.44	0.36	0.27	0.34	33	51.11	39.32	35.24	48.95	47.59	31.98	39.15	MTMR7	myotubularin related protein 7 [Source:HGNC Symbol;Acc:HGNC:7454]	Metabolism;Environmental Information Processing;Metabolism	Global and overview maps;Signal transduction;Carbohydrate metabolism	ko01100//Metabolic pathways;ko04070//Phosphatidylinositol signaling system;ko00562//Inositol phosphate metabolism	K18083;K18083;K18083	GO:0005737//cytoplasm;GO:0005829//cytosol;GO:0012505//endomembrane system;GO:0016020//membrane	GO:0004438//phosphatidylinositol-3-phosphatase activity;GO:0004725//protein tyrosine phosphatase activity;GO:0005515//protein binding;GO:0016787//hydrolase activity;GO:0016791//phosphatase activity;GO:0052866//phosphatidylinositol phosphate phosphatase activity	GO:0006470//protein dephosphorylation;GO:0006661//phosphatidylinositol biosynthetic process;GO:0016311//dephosphorylation;GO:0035335//peptidyl-tyrosine dephosphorylation;GO:0046855//inositol phosphate dephosphorylation;GO:0046856//phosphatidylinositol dephosphorylation
ENSG00000003989	36.76	33.57	32.53	34.88	43.18	35.98	39.59	45.15	5137	5793	5513	5372	7282	6705	7055	8255	SLC7A2	solute carrier family 7 member 2 [Source:HGNC Symbol;Acc:HGNC:11060]	-	-	-	-	GO:0005886//plasma membrane;GO:0005887//integral component of plasma membrane;GO:0016020//membrane;GO:0016021//integral component of membrane;GO:0030054//cell junction	GO:0000064//L-ornithine transmembrane transporter activity;GO:0015171//amino acid transmembrane transporter activity;GO:0015174//basic amino acid transmembrane transporter activity;GO:0015179//L-amino acid transmembrane transporter activity;GO:0015181//arginine transmembrane transporter activity;GO:0015189//L-lysine transmembrane transporter activity;GO:0022857//transmembrane transporter activity…	GO:0006865//amino acid transport;GO:0015807//L-amino acid transport;GO:0015809//arginine transport;GO:0055085//transmembrane transport;GO:0089718//amino acid import across plasma membrane;GO:0097638//L-arginine import across plasma membrane;GO:1902475//L-alpha-amino acid transmembrane transport;GO:1903352//L-ornithine transmembrane transport;GO:1903401//L-lysine transmembrane transport
ENSG00000004059	27.75	44.48	44.22	43.33	50.36	48.76	50.43	46.93	545	1088	1058	947	1288	1331	1289	1227	ARF5	ADP ribosylation factor 5 [Source:HGNC Symbol;Acc:HGNC:658]	Cellular Processes	Transport and catabolism	ko04144//Endocytosis	K07940	GO:0005737//cytoplasm;GO:0005794//Golgi apparatus;GO:0005886//plasma membrane;GO:0016020//membrane;GO:0048471//perinuclear region of cytoplasm;GO:0070062//extracellular exosome	GO:0000166//nucleotide binding;GO:0003924//GTPase activity;GO:0005515//protein binding;GO:0005525//GTP binding	GO:0006886//intracellular protein transport;GO:0006890//retrograde vesicle-mediated transport, Golgi to ER;GO:0015031//protein transport;GO:0016192//vesicle-mediated transport
ENSG00000004139	0.18	0.28	0.28	0.27	0.2	0.16	0.62	0.17	21.84	53.65	37.8	59.59	47.3	43.24	58.86	44.39	SARM1	sterile alpha and TIR motif containing 1 [Source:HGNC Symbol;Acc:HGNC:17074]	-	-	-	-	GO:0005737//cytoplasm;GO:0005739//mitochondrion;GO:0005829//cytosol;GO:0005874//microtubule;GO:0015630//microtubule cytoskeleton;GO:0030054//cell junction;GO:0030424//axon;GO:0030425//dendrite;GO:0031315//extrinsic component of mitochondrial outer membrane;GO:0042995//cell projection;GO:0045202//synapse	GO:0003953//NAD+ nucleosidase activity;GO:0005515//protein binding;GO:0016787//hydrolase activity;GO:0035591//signaling adaptor activity;GO:0042802//identical protein binding;GO:0050135//NAD(P)+ nucleosidase activity;GO:0061809//NAD+ nucleotidase, cyclic ADP-ribose generating	GO:0002376//immune system process;GO:0007165//signal transduction;GO:0007399//nervous system development;GO:0009749//response to glucose;GO:0019677//NAD catabolic process;GO:0030154//cell differentiation;GO:0034128//negative regulation of MyD88-independent toll-like receptor signaling pathway;GO:0042981//regulation of apoptotic process;GO:0045087//innate immune response;GO:0048678//response to ax…
ENSG00000004142	45.99	50.62	49.3	50.3	49.04	46.85	48.55	48.08	2112.63	3026.8	2871.34	2710.35	3094.98	3054.8	2982.49	3006.86	POLDIP2	DNA polymerase delta interacting protein 2 [Source:HGNC Symbol;Acc:HGNC:23781]	-	-	-	-	GO:0005634//nucleus;GO:0005739//mitochondrion;GO:0005759//mitochondrial matrix;GO:0042645//mitochondrial nucleoid	GO:0003677//DNA binding;GO:0005515//protein binding	GO:0006281//DNA repair;GO:0006974//cellular response to DNA damage stimulus;GO:0016242//negative regulation of macroautophagy;GO:0045931//positive regulation of mitotic cell cycle;GO:0070584//mitochondrion morphogenesis;GO:0070987//error-free translesion synthesis
ENSG00000004399	28.05	19.28	21.54	19.75	25.12	28.74	24.67	22.33	1680	2615	2515	2478	3354	3566	3212	3055	PLXND1	plexin D1 [Source:HGNC Symbol;Acc:HGNC:9107]	-	-	-	-	GO:0002116//semaphorin receptor complex;GO:0005886//plasma membrane;GO:0005887//integral component of plasma membrane;GO:0016020//membrane;GO:0016021//integral component of membrane;GO:0030027//lamellipodium;GO:0031258//lamellipodium membrane;GO:0042995//cell projection	GO:0005515//protein binding;GO:0017154//semaphorin receptor activity;GO:0019904//protein domain specific binding	GO:0001525//angiogenesis;GO:0001569//branching involved in blood vessel morphogenesis;GO:0001822//kidney development;GO:0003151//outflow tract morphogenesis;GO:0003279//cardiac septum development;GO:0007162//negative regulation of cell adhesion;GO:0007165//signal transduction;GO:0007221//positive regulation of transcription of Notch receptor target;GO:0007275//multicellular organism development;G…
ENSG00000004455	109.64	115.81	114.59	116.04	119.6	122.56	124.71	116.28	3180	3888	3702	3488	3974	4272	4118	4095	AK2	adenylate kinase 2 [Source:HGNC Symbol;Acc:HGNC:362]	Metabolism;Metabolism;Metabolism	Global and overview maps;Nucleotide metabolism;Metabolism of cofactors and vitamins	ko01100//Metabolic pathways;ko00230//Purine metabolism;ko00730//Thiamine metabolism	K00939;K00939;K00939	GO:0005737//cytoplasm;GO:0005739//mitochondrion;GO:0005758//mitochondrial intermembrane space;GO:0036126//sperm flagellum;GO:0070062//extracellular exosome;GO:0097226//sperm mitochondrial sheath	GO:0000166//nucleotide binding;GO:0004017//adenylate kinase activity;GO:0004550//nucleoside diphosphate kinase activity;GO:0005515//protein binding;GO:0005524//ATP binding;GO:0016301//kinase activity;GO:0016740//transferase activity;GO:0016776//phosphotransferase activity, phosphate group as acceptor;GO:0019205//nucleobase-containing compound kinase activity	GO:0006139//nucleobase-containing compound metabolic process;GO:0006163//purine nucleotide metabolic process;GO:0006165//nucleoside diphosphate phosphorylation;GO:0006172//ADP biosynthetic process;GO:0009132//nucleoside diphosphate metabolic process;GO:0015949//nucleobase-containing small molecule interconversion;GO:0016310//phosphorylation;GO:0046033//AMP metabolic process;GO:0046034//ATP metabo…
ENSG00000004468	0	0	0	0.06	0	0	0	0	0	0	0	2	0	0	0	0	CD38	CD38 molecule [Source:HGNC Symbol;Acc:HGNC:1667]	Metabolism;Environmental Information Processing;Organismal Systems;Organismal Systems;Organismal Systems;Organismal Systems;Metabolism	Global and overview maps;Signal transduction;Immune system;Endocrine system;Digestive system;Digestive system;Metabolism of cofactors and vitamins	ko01100//Metabolic pathways;ko04020//Calcium signaling pathway;ko04640//Hematopoietic cell lineage;ko04921//Oxytocin signaling pathway;ko04972//Pancreatic secretion;ko04970//Salivary secretion;ko00760//Nicotinate and nicotinamide metabolism	K01242;K01242;K01242;K01242;K01242;K01242;K01242	GO:0005634//nucleus;GO:0005886//plasma membrane;GO:0009986//cell surface;GO:0016020//membrane;GO:0016021//integral component of membrane;GO:0016323//basolateral plasma membrane;GO:0030667//secretory granule membrane;GO:0043231//intracellular membrane-bounded organelle;GO:0070062//extracellular exosome	GO:0003953//NAD+ nucleosidase activity;GO:0016740//transferase activity;GO:0016787//hydrolase activity;GO:0016798//hydrolase activity, acting on glycosyl bonds;GO:0016849//phosphorus-oxygen lyase activity;GO:0042802//identical protein binding;GO:0050135//NAD(P)+ nucleosidase activity;GO:0061809//NAD+ nucleotidase, cyclic ADP-ribose generating	GO:0001666//response to hypoxia;GO:0007165//signal transduction;GO:0007204//positive regulation of cytosolic calcium ion concentration;GO:0007565//female pregnancy;GO:0008284//positive regulation of cell proliferation;GO:0009725//response to hormone;GO:0010977//negative regulation of neuron projection development;GO:0014824//artery smooth muscle contraction;GO:0019674//NAD metabolic process;GO:00…
ENSG00000004478	26.48	33.54	32.68	34.1	34.25	33.99	33.07	33.33	1897	2946	2797	2664	3167	3310	3061	3169	FKBP4	FKBP prolyl isomerase 4 [Source:HGNC Symbol;Acc:HGNC:3720]	Organismal Systems	Endocrine system	ko04915//Estrogen signaling pathway	K09571	GO:0005634//nucleus;GO:0005654//nucleoplasm;GO:0005737//cytoplasm;GO:0005739//mitochondrion;GO:0005829//cytosol;GO:0005856//cytoskeleton;GO:0005874//microtubule;GO:0030424//axon;GO:0032991//protein-containing complex;GO:0042995//cell projection;GO:0043005//neuron projection;GO:0043025//neuronal cell body;GO:0044295//axonal growth cone;GO:0048471//perinuclear region of cytoplasm;GO:0070062//extrac…	GO:0003723//RNA binding;GO:0003755//peptidyl-prolyl cis-trans isomerase activity;GO:0005515//protein binding;GO:0005528//FK506 binding;GO:0016853//isomerase activity;GO:0030674//protein binding, bridging;GO:0031072//heat shock protein binding;GO:0032767//copper-dependent protein binding;GO:0048156//tau protein binding	GO:0000413//protein peptidyl-prolyl isomerization;GO:0006457//protein folding;GO:0006825//copper ion transport;GO:0010977//negative regulation of neuron projection development;GO:0031111//negative regulation of microtubule polymerization or depolymerization;GO:0031115//negative regulation of microtubule polymerization;GO:0061077//chaperone-mediated protein folding;GO:1900034//regulation of cellul…
ENSG00000004487	60.89	63.02	63.77	63.56	59.31	56.97	58.49	60.59	3615	4586	4509	4128	4506	4620	4468	4749	KDM1A	lysine demethylase 1A [Source:HGNC Symbol;Acc:HGNC:29079]	Organismal Systems	Environmental adaptation	ko04714//Thermogenesis	K11450	GO:0000781//chromosome, telomeric region;GO:0000785//chromatin;GO:0005634//nucleus;GO:0005654//nucleoplasm;GO:0005667//transcription factor complex;GO:0032991//protein-containing complex;GO:1990391//DNA repair complex	GO:0001085//RNA polymerase II transcription factor binding;GO:0002039//p53 binding;GO:0003682//chromatin binding;GO:0005515//protein binding;GO:0008134//transcription factor binding;GO:0016491//oxidoreductase activity;GO:0019899//enzyme binding;GO:0030374//nuclear receptor transcription coactivator activity;GO:0032451//demethylase activity;GO:0032452//histone demethylase activity;GO:0032453//hist…	GO:0000122//negative regulation of transcription by RNA polymerase II;GO:0000380//alternative mRNA splicing, via spliceosome;GO:0002052//positive regulation of neuroblast proliferation;GO:0006325//chromatin organization;GO:0006355//regulation of transcription, DNA-templated;GO:0006357//regulation of transcription by RNA polymerase II;GO:0006482//protein demethylation;GO:0007275//multicellular org…
ENSG00000004534	25.74	29.8	29.46	28.03	25.1	29.17	31.26	27.69	1512.29	2264	2109	1865	1939	2252	2224	2142	RBM6	RNA binding motif protein 6 [Source:HGNC Symbol;Acc:HGNC:9903]	-	-	-	-	GO:0005634//nucleus	GO:0003676//nucleic acid binding;GO:0003677//DNA binding;GO:0003723//RNA binding;GO:0005515//protein binding	GO:0000398//mRNA splicing, via spliceosome;GO:0006396//RNA processing
ENSG00000004660	0.69	0.86	1.07	0.82	1	0.92	1.04	0.85	47	73	87	60	87	84	92	77	CAMKK1	calcium/calmodulin dependent protein kinase kinase 1 [Source:HGNC Symbol;Acc:HGNC:1469]	Human Diseases	Substance dependence	ko05034//Alcoholism	K00908	GO:0005634//nucleus;GO:0005654//nucleoplasm;GO:0005737//cytoplasm;GO:0005829//cytosol	GO:0000166//nucleotide binding;GO:0004672//protein kinase activity;GO:0004674//protein serine/threonine kinase activity;GO:0004683//calmodulin-dependent protein kinase activity;GO:0005515//protein binding;GO:0005516//calmodulin binding;GO:0005524//ATP binding;GO:0016301//kinase activity;GO:0016740//transferase activity	GO:0006468//protein phosphorylation;GO:0016310//phosphorylation;GO:0035556//intracellular signal transduction;GO:0045860//positive regulation of protein kinase activity
ENSG00000004700	17.19	14.85	14.27	14.86	12.55	10.64	12.15	15	867.19	932.34	918.61	825.94	866.35	747.69	813.67	972.58	RECQL	RecQ like helicase [Source:HGNC Symbol;Acc:HGNC:9948]	-	-	-	-	GO:0005634//nucleus;GO:0005654//nucleoplasm;GO:0005694//chromosome;GO:0005737//cytoplasm;GO:0016020//membrane	GO:0000166//nucleotide binding;GO:0003676//nucleic acid binding;GO:0003677//DNA binding;GO:0003678//DNA helicase activity;GO:0004386//helicase activity;GO:0005515//protein binding;GO:0005524//ATP binding;GO:0009378//four-way junction helicase activity;GO:0016787//hydrolase activity;GO:0036310//annealing helicase activity;GO:0043138//3'-5' DNA helicase activity	GO:0000724//double-strand break repair via homologous recombination;GO:0000733//DNA strand renaturation;GO:0006268//DNA unwinding involved in DNA replication;GO:0006281//DNA repair;GO:0006310//DNA recombination;GO:0032508//DNA duplex unwinding
ENSG00000004766	6.59	5.12	5.79	6.22	4.47	5.32	4.11	5.6	369	364	383	357	361	382	305	372	VPS50	VPS50 subunit of EARP/GARPII complex [Source:HGNC Symbol;Acc:HGNC:25956]	-	-	-	-	GO:0005768//endosome;GO:0005829//cytosol;GO:0016020//membrane;GO:0055037//recycling endosome;GO:0070062//extracellular exosome;GO:1990745//EARP complex	GO:0000149//SNARE binding;GO:0005515//protein binding	GO:0015031//protein transport;GO:0032456//endocytic recycling;GO:0042147//retrograde transport, endosome to Golgi
ENSG00000004776	0.14	0.26	0.09	0.16	0.03	0.13	0.08	0.09	4	9	3	5	1	5	3	2	HSPB6	heat shock protein family B (small) member 6 [Source:HGNC Symbol;Acc:HGNC:26511]	-	-	-	-	GO:0005576//extracellular region;GO:0005634//nucleus;GO:0005730//nucleolus;GO:0005737//cytoplasm;GO:0005794//Golgi apparatus;GO:0005829//cytosol	GO:0005212//structural constituent of eye lens;GO:0005515//protein binding;GO:0042803//protein homodimerization activity;GO:0051082//unfolded protein binding;GO:0051087//chaperone binding	GO:0006937//regulation of muscle contraction;GO:0010667//negative regulation of cardiac muscle cell apoptotic process;GO:0045766//positive regulation of angiogenesis;GO:0061077//chaperone-mediated protein folding
ENSG00000004777	1.57	1.25	0.99	1	1.49	1.18	1.21	1.33	68	86	92	75	101	109	90	104	ARHGAP33	Rho GTPase activating protein 33 [Source:HGNC Symbol;Acc:HGNC:23085]	-	-	-	-	GO:0005737//cytoplasm;GO:0005829//cytosol;GO:0005886//plasma membrane;GO:0032991//protein-containing complex;GO:0043197//dendritic spine	GO:0005096//GTPase activator activity;GO:0005515//protein binding;GO:0019901//protein kinase binding;GO:0035091//phosphatidylinositol binding	GO:0007165//signal transduction;GO:0007264//small GTPase mediated signal transduction;GO:0009636//response to toxic substance;GO:0015031//protein transport;GO:0043547//positive regulation of GTPase activity;GO:0051056//regulation of small GTPase mediated signal transduction;GO:0061001//regulation of dendritic spine morphogenesis
ENSG00000004779	177.06	160.11	168.88	164.79	162.23	122.02	141.54	162.05	2300	2548	2620	2355	2697	2165	2364	2778	NDUFAB1	NADH:ubiquinone oxidoreductase subunit AB1 [Source:HGNC Symbol;Acc:HGNC:7694]	Metabolism;Human Diseases;Human Diseases;Organismal Systems;Human Diseases;Human Diseases;Organismal Systems;Metabolism	Global and overview maps;Neurodegenerative diseases;Neurodegenerative diseases;Environmental adaptation;Endocrine and metabolic diseases;Neurodegenerative diseases;Nervous system;Energy metabolism	ko01100//Metabolic pathways;ko05010//Alzheimer disease;ko05016//Huntington disease;ko04714//Thermogenesis;ko04932//Non-alcoholic fatty liver disease (NAFLD);ko05012//Parkinson disease;ko04723//Retrograde endocannabinoid signaling;ko00190//Oxidative phosphorylation	K03955;K03955;K03955;K03955;K03955;K03955;K03955;K03955	GO:0005654//nucleoplasm;GO:0005739//mitochondrion;GO:0005743//mitochondrial inner membrane;GO:0005747//mitochondrial respiratory chain complex I;GO:0005759//mitochondrial matrix;GO:0005762//mitochondrial large ribosomal subunit;GO:0031966//mitochondrial membrane;GO:0070469//respiratory chain	GO:0000035//acyl binding;GO:0000036//acyl carrier activity;GO:0005504//fatty acid binding;GO:0005509//calcium ion binding;GO:0005515//protein binding;GO:0008137//NADH dehydrogenase (ubiquinone) activity	GO:0006120//mitochondrial electron transport, NADH to ubiquinone;GO:0006629//lipid metabolic process;GO:0006631//fatty acid metabolic process;GO:0006633//fatty acid biosynthetic process;GO:0009249//protein lipoylation;GO:0032981//mitochondrial respiratory chain complex I assembly;GO:0055114//oxidation-reduction process
ENSG00000004799	0	0.03	0.02	0	0	0	0.02	0.01	0	3	2	0	0	0	2	1	PDK4	pyruvate dehydrogenase kinase 4 [Source:HGNC Symbol;Acc:HGNC:8812]	-	-	-	-	GO:0005739//mitochondrion;GO:0005759//mitochondrial matrix	GO:0000166//nucleotide binding;GO:0004672//protein kinase activity;GO:0004674//protein serine/threonine kinase activity;GO:0004740//pyruvate dehydrogenase (acetyl-transferring) kinase activity;GO:0005515//protein binding;GO:0005524//ATP binding;GO:0016301//kinase activity;GO:0016740//transferase activity	GO:0005975//carbohydrate metabolic process;GO:0006006//glucose metabolic process;GO:0006468//protein phosphorylation;GO:0006885//regulation of pH;GO:0008286//insulin receptor signaling pathway;GO:0009267//cellular response to starvation;GO:0010510//regulation of acetyl-CoA biosynthetic process from pyruvate;GO:0010565//regulation of cellular ketone metabolic process;GO:0010906//regulation of gluc…
ENSG00000004809	0	0	0.07	0	0	0	0	0.08	0	0	2	0	0	0	0	2	SLC22A16	solute carrier family 22 member 16 [Source:HGNC Symbol;Acc:HGNC:20302]	-	-	-	-	GO:0005829//cytosol;GO:0005886//plasma membrane;GO:0016020//membrane;GO:0016021//integral component of membrane	GO:0005275//amine transmembrane transporter activity;GO:0015101//organic cation transmembrane transporter activity;GO:0015226//carnitine transmembrane transporter activity;GO:0022857//transmembrane transporter activity	GO:0006811//ion transport;GO:0007275//multicellular organism development;GO:0007283//spermatogenesis;GO:0007338//single fertilization;GO:0015695//organic cation transport;GO:0015837//amine transport;GO:0015879//carnitine transport;GO:0030154//cell differentiation;GO:0030317//flagellated sperm motility;GO:0046717//acid secretion;GO:0055085//transmembrane transport;GO:1902603//carnitine transmembra…
ENSG00000004838	0.1	0.21	0.19	0.21	0.13	0.21	0.25	0.27	2	6	8	8	5	6	10	11	ZMYND10	zinc finger MYND-type containing 10 [Source:HGNC Symbol;Acc:HGNC:19412]	-	-	-	-	GO:0005737//cytoplasm;GO:0005815//microtubule organizing center;GO:0005856//cytoskeleton;GO:0005886//plasma membrane;GO:0016020//membrane;GO:0016324//apical plasma membrane;GO:0034451//centriolar satellite	GO:0005515//protein binding;GO:0044183//protein binding involved in protein folding;GO:0046872//metal ion binding;GO:0060090//molecular adaptor activity	GO:0003341//cilium movement;GO:0006457//protein folding;GO:0036158//outer dynein arm assembly;GO:0036159//inner dynein arm assembly;GO:0044458//motile cilium assembly;GO:0061512//protein localization to cilium;GO:1905505//positive regulation of motile cilium assembly
ENSG00000004846	0	0	0	0	0	0	0	0	0	0	0	0	0	0	0	0	ABCB5	ATP binding cassette subfamily B member 5 [Source:HGNC Symbol;Acc:HGNC:46]	Environmental Information Processing	Membrane transport	ko02010//ABC transporters	K05660	GO:0005886//plasma membrane;GO:0005887//integral component of plasma membrane;GO:0016020//membrane;GO:0016021//integral component of membrane	GO:0000166//nucleotide binding;GO:0005524//ATP binding;GO:0015562//efflux transmembrane transporter activity;GO:0016887//ATPase activity;GO:0042626//ATPase activity, coupled to transmembrane movement of substances	GO:0001654//eye development;GO:0030154//cell differentiation;GO:0042391//regulation of membrane potential;GO:0055085//transmembrane transport
ENSG00000004848	0	0	0	0	0	0	0	0	0	0	0	0	0	0	0	0	ARX	aristaless related homeobox [Source:HGNC Symbol;Acc:HGNC:18060]	-	-	-	-	GO:0000785//chromatin;GO:0005634//nucleus	GO:0000977//RNA polymerase II regulatory region sequence-specific DNA binding;GO:0000978//RNA polymerase II proximal promoter sequence-specific DNA binding;GO:0000981//DNA-binding transcription factor activity, RNA polymerase II-specific;GO:0001227//DNA-binding transcription repressor activity, RNA polymerase II-specific;GO:0003677//DNA binding;GO:0003682//chromatin binding;GO:1990837//sequence-s…	GO:0000122//negative regulation of transcription by RNA polymerase II;GO:0001764//neuron migration;GO:0006355//regulation of transcription, DNA-templated;GO:0006357//regulation of transcription by RNA polymerase II;GO:0007275//multicellular organism development;GO:0007399//nervous system development;GO:0007411//axon guidance;GO:0010628//positive regulation of gene expression;GO:0021759//globus pa…
ENSG00000004864	45.72	46.29	47.27	47.07	44.66	40.05	42.95	46.58	2790	3378	3364	3140	3445	3270	3307	3607	SLC25A13	solute carrier family 25 member 13 [Source:HGNC Symbol;Acc:HGNC:10983]	-	-	-	-	GO:0005739//mitochondrion;GO:0005743//mitochondrial inner membrane;GO:0005887//integral component of plasma membrane;GO:0016020//membrane;GO:0016021//integral component of membrane	GO:0005313//L-glutamate transmembrane transporter activity;GO:0005347//ATP transmembrane transporter activity;GO:0005509//calcium ion binding;GO:0015171//amino acid transmembrane transporter activity;GO:0015183//L-aspartate transmembrane transporter activity;GO:0022857//transmembrane transporter activity;GO:0042802//identical protein binding;GO:0046872//metal ion binding	GO:0003333//amino acid transmembrane transport;GO:0006094//gluconeogenesis;GO:0006754//ATP biosynthetic process;GO:0006839//mitochondrial transport;GO:0015810//aspartate transmembrane transport;GO:0015813//L-glutamate transmembrane transport;GO:0043490//malate-aspartate shuttle;GO:0045333//cellular respiration;GO:0051592//response to calcium ion;GO:0055085//transmembrane transport;GO:0070778//L-a…
ENSG00000004866	12.21	13.87	12.27	13.2	11.41	12.41	12.35	12.11	550	701	625.94	626.97	642	757.96	659.93	679.96	ST7	suppression of tumorigenicity 7 [Source:HGNC Symbol;Acc:HGNC:11351]	-	-	-	-	GO:0016020//membrane;GO:0016021//integral component of membrane	GO:0005515//protein binding	GO:0030198//extracellular matrix organization;GO:0045595//regulation of cell differentiation
ENSG00000004897	60.67	56.91	49.86	55.74	47.49	47.85	42.36	48.86	4376	4133	3841	3605	3344	3462	3452	3752	CDC27	cell division cycle 27 [Source:HGNC Symbol;Acc:HGNC:1728]	Human Diseases;Genetic Information Processing;Cellular Processes;Cellular Processes;Organismal Systems	Infectious diseases;Folding, sorting and degradation;Cell growth and death;Cell growth and death;Endocrine system	ko05166//HTLV-I infection;ko04120//Ubiquitin mediated proteolysis;ko04114//Oocyte meiosis;ko04110//Cell cycle;ko04914//Progesterone-mediated oocyte maturation	K03350;K03350;K03350;K03350;K03350	GO:0005634//nucleus;GO:0005654//nucleoplasm;GO:0005680//anaphase-promoting complex;GO:0005737//cytoplasm;GO:0005813//centrosome;GO:0005819//spindle;GO:0005829//cytosol;GO:0016020//membrane;GO:0016021//integral component of membrane;GO:0072686//mitotic spindle	GO:0005515//protein binding;GO:0019903//protein phosphatase binding	GO:0006511//ubiquitin-dependent protein catabolic process;GO:0007091//metaphase/anaphase transition of mitotic cell cycle;GO:0016567//protein ubiquitination;GO:0031145//anaphase-promoting complex-dependent catabolic process;GO:0045842//positive regulation of mitotic metaphase/anaphase transition;GO:0051301//cell division;GO:0070979//protein K11-linked ubiquitination;GO:1901990//regulation of mito…
ENSG00000004939	0	0	0.01	0	0	0.02	0	0	0	0	1	0	0	3	0	0	SLC4A1	solute carrier family 4 member 1 (Diego blood group) [Source:HGNC Symbol;Acc:HGNC:11027]	Organismal Systems	Excretory system	ko04966//Collecting duct acid secretion	K06573	GO:0005886//plasma membrane;GO:0005887//integral component of plasma membrane;GO:0009898//cytoplasmic side of plasma membrane;GO:0016020//membrane;GO:0016021//integral component of membrane;GO:0016323//basolateral plasma membrane;GO:0030018//Z disc;GO:0030863//cortical cytoskeleton;GO:0070062//extracellular exosome;GO:0072562//blood microparticle	GO:0005452//inorganic anion exchanger activity;GO:0005515//protein binding;GO:0008509//anion transmembrane transporter activity;GO:0015106//bicarbonate transmembrane transporter activity;GO:0015108//chloride transmembrane transporter activity;GO:0015301//anion:anion antiporter activity;GO:0022857//transmembrane transporter activity;GO:0030492//hemoglobin binding;GO:0030506//ankyrin binding;GO:004…	GO:0006811//ion transport;GO:0006820//anion transport;GO:0006821//chloride transport;GO:0006873//cellular ion homeostasis;GO:0007596//blood coagulation;GO:0015698//inorganic anion transport;GO:0015701//bicarbonate transport;GO:0017121//phospholipid scrambling;GO:0035811//negative regulation of urine volume;GO:0045852//pH elevation;GO:0048821//erythrocyte development;GO:0050801//ion homeostasis;GO…
ENSG00000004948	0	0	0	0	0	0	0	0	0	0	0	0	0	0	0	0	CALCR	calcitonin receptor [Source:HGNC Symbol;Acc:HGNC:1440]	Environmental Information Processing;Organismal Systems	Signaling molecules and interaction;Development	ko04080//Neuroactive ligand-receptor interaction;ko04380//Osteoclast differentiation	K04576;K04576	GO:0001669//acrosomal vesicle;GO:0005886//plasma membrane;GO:0005887//integral component of plasma membrane;GO:0005929//cilium;GO:0016020//membrane;GO:0016021//integral component of membrane;GO:0030424//axon;GO:0150056//amylin receptor complex 1;GO:0150057//amylin receptor complex 2;GO:0150058//amylin receptor complex 3	GO:0001540//amyloid-beta binding;GO:0001635//calcitonin gene-related peptide receptor activity;GO:0004888//transmembrane signaling receptor activity;GO:0004930//G protein-coupled receptor activity;GO:0004948//calcitonin receptor activity;GO:0005515//protein binding;GO:0008528//G protein-coupled peptide receptor activity;GO:0032841//calcitonin binding;GO:0097643//amylin receptor activity	GO:0007165//signal transduction;GO:0007166//cell surface receptor signaling pathway;GO:0007186//G protein-coupled receptor signaling pathway;GO:0007188//adenylate cyclase-modulating G protein-coupled receptor signaling pathway;GO:0007189//adenylate cyclase-activating G protein-coupled receptor signaling pathway;GO:0007204//positive regulation of cytosolic calcium ion concentration;GO:0010628//pos…
ENSG00000004961	13.11	11.72	13.74	12.84	11.97	9.54	11.03	13.89	466	474	554	455	460	459	463	497	HCCS	holocytochrome c synthase [Source:HGNC Symbol;Acc:HGNC:4837]	Metabolism	Metabolism of cofactors and vitamins	ko00860//Porphyrin and chlorophyll metabolism	K01764	GO:0005739//mitochondrion;GO:0005743//mitochondrial inner membrane;GO:0016020//membrane	GO:0004408//holocytochrome-c synthase activity;GO:0005515//protein binding;GO:0016829//lyase activity;GO:0020037//heme binding;GO:0046872//metal ion binding	GO:0009887//animal organ morphogenesis;GO:0018063//cytochrome c-heme linkage;GO:0018215//protein phosphopantetheinylation;GO:0055114//oxidation-reduction process
ENSG00000004975	16.61	18.99	20.16	20.07	19.24	19.59	19.03	17.64	734	1108	1148	1058	1186	1194	1150	1129	DVL2	dishevelled segment polarity protein 2 [Source:HGNC Symbol;Acc:HGNC:3086]	Human Diseases;Human Diseases;Human Diseases;Human Diseases;Environmental Information Processing;Environmental Information Processing;Human Diseases;Environmental Information Processing;Human Diseases;Human Diseases;Cellular Processes;Organismal Systems;Human Diseases;Environmental Information Processing	Cancers;Neurodegenerative diseases;Infectious diseases;Cancers;Signal transduction;Signal transduction;Endocrine and metabolic diseases;Signal transduction;Cancers;Cancers;Cellular community - eukaryotes;Endocrine system;Cancers;Signal transduction	ko05200//Pathways in cancer;ko05010//Alzheimer disease;ko05165//Human papillomavirus infection;ko05225//Hepatocellular carcinoma;ko04310//Wnt signaling pathway;ko04150//mTOR signaling pathway;ko04934//Cushing syndrome;ko04390//Hippo signaling pathway;ko05224//Breast cancer;ko05226//Gastric cancer;ko04550//Signaling pathways regulating pluripotency of stem cells;ko04916//Melanogenesis;ko05217//Bas…	K02353;K02353;K02353;K02353;K02353;K02353;K02353;K02353;K02353;K02353;K02353;K02353;K02353;K02353	GO:0005634//nucleus;GO:0005654//nucleoplasm;GO:0005737//cytoplasm;GO:0005829//cytosol;GO:0005886//plasma membrane;GO:0016020//membrane;GO:0016235//aggresome;GO:0016328//lateral plasma membrane;GO:0016604//nuclear body;GO:0030136//clathrin-coated vesicle;GO:0031410//cytoplasmic vesicle;GO:0045177//apical part of cell;GO:0045334//clathrin-coated endocytic vesicle	GO:0005109//frizzled binding;GO:0005515//protein binding;GO:0019901//protein kinase binding;GO:0019904//protein domain specific binding;GO:0030674//protein binding, bridging;GO:0031267//small GTPase binding;GO:0042802//identical protein binding;GO:0043621//protein self-association	GO:0001843//neural tube closure;GO:0001934//positive regulation of protein phosphorylation;GO:0003007//heart morphogenesis;GO:0003151//outflow tract morphogenesis;GO:0006355//regulation of transcription, DNA-templated;GO:0007275//multicellular organism development;GO:0007379//segment specification;GO:0007507//heart development;GO:0016055//Wnt signaling pathway;GO:0022007//convergent extension inv…
ENSG00000005001	0	0.03	0.12	0.07	0.09	0	0.05	0.05	0	1	3	2	3	0	1	1	PRSS22	serine protease 22 [Source:HGNC Symbol;Acc:HGNC:14368]	-	-	-	-	GO:0005576//extracellular region;GO:0005615//extracellular space	GO:0004252//serine-type endopeptidase activity;GO:0008233//peptidase activity;GO:0008236//serine-type peptidase activity;GO:0016504//peptidase activator activity;GO:0016787//hydrolase activity	GO:0006508//proteolysis;GO:0010952//positive regulation of peptidase activity
ENSG00000005007	24.84	39.51	39.53	40.52	40.09	36.98	36.9	37.06	2578	5028	4907	4632	5327	5246	4928	5082	UPF1	UPF1 RNA helicase and ATPase [Source:HGNC Symbol;Acc:HGNC:9962]	Genetic Information Processing;Genetic Information Processing	Translation;Translation	ko03013//RNA transport;ko03015//mRNA surveillance pathway	K14326;K14326	GO:0000781//chromosome, telomeric region;GO:0000785//chromatin;GO:0000932//P-body;GO:0005634//nucleus;GO:0005654//nucleoplasm;GO:0005737//cytoplasm;GO:0005829//cytosol;GO:0035145//exon-exon junction complex;GO:0044530//supraspliceosomal complex	GO:0000166//nucleotide binding;GO:0003677//DNA binding;GO:0003682//chromatin binding;GO:0003723//RNA binding;GO:0003724//RNA helicase activity;GO:0004386//helicase activity;GO:0005515//protein binding;GO:0005524//ATP binding;GO:0008270//zinc ion binding;GO:0016787//hydrolase activity;GO:0042162//telomeric DNA binding;GO:0046872//metal ion binding	GO:0000184//nuclear-transcribed mRNA catabolic process, nonsense-mediated decay;GO:0000294//nuclear-transcribed mRNA catabolic process, endonucleolytic cleavage-dependent decay;GO:0000956//nuclear-transcribed mRNA catabolic process;GO:0006260//DNA replication;GO:0006281//DNA repair;GO:0006406//mRNA export from nucleus;GO:0006449//regulation of translational termination;GO:0009048//dosage compensa…
ENSG00000005020	10.63	8.22	8.34	8.88	6.14	5.63	6.31	6.68	796	755	747	733	589	576	608	661	SKAP2	src kinase associated phosphoprotein 2 [Source:HGNC Symbol;Acc:HGNC:15687]	Human Diseases	Infectious disease: bacterial	ko05135//Yersinia infection	K23471	GO:0005654//nucleoplasm;GO:0005737//cytoplasm;GO:0005829//cytosol;GO:0005886//plasma membrane	GO:0005515//protein binding	GO:0007165//signal transduction;GO:0008285//negative regulation of cell proliferation;GO:0042113//B cell activation;GO:0065003//protein-containing complex assembly
ENSG00000005022	203.53	254.5	261.22	261.8	301.67	251.57	268.17	281.85	5191	7959	7968	7354	9851	8768	8801	9498	SLC25A5	solute carrier family 25 member 5 [Source:HGNC Symbol;Acc:HGNC:10991]	Human Diseases;Human Diseases;Environmental Information Processing;Human Diseases;Human Diseases;Environmental Information Processing;Cellular Processes;Cellular Processes;Human Diseases	Neurodegenerative diseases;Neurodegenerative diseases;Signal transduction;Infectious diseases;Infectious diseases;Signal transduction;Cell growth and death;Cell growth and death;Neurodegenerative diseases	ko05010//Alzheimer disease;ko05016//Huntington disease;ko04020//Calcium signaling pathway;ko05166//HTLV-I infection;ko05164//Influenza A;ko04022//cGMP - PKG signaling pathway;ko04217//Necroptosis;ko04218//Cellular senescence;ko05012//Parkinson disease	K05863;K05863;K05863;K05863;K05863;K05863;K05863;K05863;K05863	GO:0005634//nucleus;GO:0005739//mitochondrion;GO:0005743//mitochondrial inner membrane;GO:0005887//integral component of plasma membrane;GO:0016020//membrane;GO:0016021//integral component of membrane;GO:0042645//mitochondrial nucleoid;GO:0045121//membrane raft;GO:0071817//MMXD complex	GO:0000295//adenine nucleotide transmembrane transporter activity;GO:0003723//RNA binding;GO:0005347//ATP transmembrane transporter activity;GO:0005471//ATP:ADP antiporter activity;GO:0005515//protein binding;GO:0015207//adenine transmembrane transporter activity;GO:0022857//transmembrane transporter activity;GO:0031625//ubiquitin protein ligase binding	GO:0007059//chromosome segregation;GO:0008284//positive regulation of cell proliferation;GO:0015853//adenine transport;GO:0016032//viral process;GO:0050796//regulation of insulin secretion;GO:0051503//adenine nucleotide transport;GO:0055085//transmembrane transport;GO:0140021//mitochondrial ADP transmembrane transport;GO:1901029//negative regulation of mitochondrial outer membrane permeabilizatio…
ENSG00000005059	2.9	3.07	2.25	2.04	2.76	1.72	2.3	2.33	126	164	117	98	154	102	129	134	MCUB	mitochondrial calcium uniporter dominant negative subunit beta [Source:HGNC Symbol;Acc:HGNC:26076]	-	-	-	-	GO:0005654//nucleoplasm;GO:0005739//mitochondrion;GO:0005743//mitochondrial inner membrane;GO:0016020//membrane;GO:0016021//integral component of membrane;GO:0031224//intrinsic component of membrane;GO:0031305//integral component of mitochondrial inner membrane;GO:0034704//calcium channel complex;GO:0043231//intracellular membrane-bounded organelle;GO:1990246//uniplex complex	GO:0019855//calcium channel inhibitor activity	GO:0006811//ion transport;GO:0006816//calcium ion transport;GO:0006851//mitochondrial calcium ion transmembrane transport;GO:0036444//calcium import into the mitochondrion;GO:0051560//mitochondrial calcium ion homeostasis
ENSG00000005073	0	0.06	0	0	0	0.02	0.04	0	0	3	0	0	0	1	2	0	HOXA11	homeobox A11 [Source:HGNC Symbol;Acc:HGNC:5101]	Human Diseases	Cancers	ko05202//Transcriptional misregulation in cancers	K21951	GO:0005634//nucleus;GO:0005654//nucleoplasm;GO:0005667//transcription factor complex;GO:0032991//protein-containing complex;GO:0032993//protein-DNA complex	GO:0000978//RNA polymerase II proximal promoter sequence-specific DNA binding;GO:0000981//DNA-binding transcription factor activity, RNA polymerase II-specific;GO:0003677//DNA binding;GO:1990837//sequence-specific double-stranded DNA binding	GO:0001501//skeletal system development;GO:0001656//metanephros development;GO:0001658//branching involved in ureteric bud morphogenesis;GO:0001759//organ induction;GO:0006355//regulation of transcription, DNA-templated;GO:0006357//regulation of transcription by RNA polymerase II;GO:0007275//multicellular organism development;GO:0007283//spermatogenesis;GO:0007338//single fertilization;GO:0007501…
ENSG00000005075	20.22	21.99	22.4	21.03	21.08	22.66	23.26	21.49	364.74	487.19	484.89	419.22	487.68	561.87	541.59	512.98	POLR2J	RNA polymerase II subunit J [Source:HGNC Symbol;Acc:HGNC:9197]	Human Diseases;Genetic Information Processing	Neurodegenerative diseases;Transcription	ko05016//Huntington disease;ko03020//RNA polymerase	K03008;K03008	GO:0005634//nucleus;GO:0005654//nucleoplasm;GO:0005665//RNA polymerase II, core complex	GO:0001055//RNA polymerase II activity;GO:0003677//DNA binding;GO:0003899//DNA-directed 5'-3' RNA polymerase activity;GO:0005515//protein binding;GO:0030275//LRR domain binding;GO:0046983//protein dimerization activity	GO:0000398//mRNA splicing, via spliceosome;GO:0006283//transcription-coupled nucleotide-excision repair;GO:0006351//transcription, DNA-templated;GO:0006366//transcription by RNA polymerase II;GO:0006367//transcription initiation from RNA polymerase II promoter;GO:0006368//transcription elongation from RNA polymerase II promoter;GO:0006370//7-methylguanosine mRNA capping;GO:0008543//fibroblast gro…
ENSG00000005100	22.9	26.57	24.53	25.68	20.93	23.4	21.67	21.66	2160	2898	2739	2542	2402	2522	2365	2501	DHX33	DEAH-box helicase 33 [Source:HGNC Symbol;Acc:HGNC:16718]	Organismal Systems	Immune system	ko04621//NOD-like receptor signaling pathway	K17820	GO:0005634//nucleus;GO:0005654//nucleoplasm;GO:0005730//nucleolus;GO:0005737//cytoplasm;GO:0061702//inflammasome complex;GO:0072559//NLRP3 inflammasome complex	GO:0000166//nucleotide binding;GO:0000182//rDNA binding;GO:0003676//nucleic acid binding;GO:0003723//RNA binding;GO:0003724//RNA helicase activity;GO:0003725//double-stranded RNA binding;GO:0003729//mRNA binding;GO:0004386//helicase activity;GO:0005515//protein binding;GO:0005524//ATP binding;GO:0016787//hydrolase activity;GO:0033613//activating transcription factor binding;GO:0043023//ribosomal …	GO:0006413//translational initiation;GO:0032481//positive regulation of type I interferon production;GO:0043410//positive regulation of MAPK cascade;GO:0045943//positive regulation of transcription by RNA polymerase I;GO:0051092//positive regulation of NF-kappaB transcription factor activity;GO:1900227//positive regulation of NLRP3 inflammasome complex assembly
ENSG00000005102	0	0	0	0	0	0	0	0	0	0	0	0	0	0	0	0	MEOX1	mesenchyme homeobox 1 [Source:HGNC Symbol;Acc:HGNC:7013]	-	-	-	-	GO:0000785//chromatin;GO:0005634//nucleus;GO:0005737//cytoplasm	GO:0000978//RNA polymerase II proximal promoter sequence-specific DNA binding;GO:0000981//DNA-binding transcription factor activity, RNA polymerase II-specific;GO:0001228//DNA-binding transcription activator activity, RNA polymerase II-specific;GO:0003677//DNA binding;GO:0003682//chromatin binding;GO:0003700//DNA-binding transcription factor activity;GO:0005515//protein binding;GO:0043565//sequen…	GO:0001757//somite specification;GO:0006355//regulation of transcription, DNA-templated;GO:0006357//regulation of transcription by RNA polymerase II;GO:0007275//multicellular organism development;GO:0008150//biological_process;GO:0045944//positive regulation of transcription by RNA polymerase II;GO:0060218//hematopoietic stem cell differentiation;GO:0061053//somite development;GO:0061056//sclerot…
ENSG00000005108	0	0.01	0	0.01	0.01	0.01	0.01	0	1	2	0	2	3	2	2	0	THSD7A	thrombospondin type 1 domain containing 7A [Source:HGNC Symbol;Acc:HGNC:22207]	-	-	-	-	GO:0005576//extracellular region;GO:0005886//plasma membrane;GO:0016020//membrane;GO:0016021//integral component of membrane;GO:0042995//cell projection	GO:0005515//protein binding	GO:0001525//angiogenesis;GO:0030154//cell differentiation;GO:0031532//actin cytoskeleton reorganization
ENSG00000005156	17.88	19.65	21.86	18.68	16.66	23.92	20.02	17.12	968.92	1455.78	1429.42	1321.06	1508.34	1592.03	1442.83	1467.83	LIG3	DNA ligase 3 [Source:HGNC Symbol;Acc:HGNC:6600]	Genetic Information Processing	Replication and repair	ko03410//Base excision repair	K10776	GO:0005634//nucleus;GO:0005654//nucleoplasm;GO:0005737//cytoplasm;GO:0005739//mitochondrion;GO:0070421//DNA ligase III-XRCC1 complex	GO:0000166//nucleotide binding;GO:0003677//DNA binding;GO:0003909//DNA ligase activity;GO:0003910//DNA ligase (ATP) activity;GO:0005515//protein binding;GO:0005524//ATP binding;GO:0008270//zinc ion binding;GO:0016874//ligase activity;GO:0046872//metal ion binding	GO:0000724//double-strand break repair via homologous recombination;GO:0006260//DNA replication;GO:0006266//DNA ligation;GO:0006273//lagging strand elongation;GO:0006281//DNA repair;GO:0006283//transcription-coupled nucleotide-excision repair;GO:0006288//base-excision repair, DNA ligation;GO:0006297//nucleotide-excision repair, DNA gap filling;GO:0006302//double-strand break repair;GO:0006310//DN…
ENSG00000005175	17.11	14.75	13.87	14.16	11.12	11.34	12.6	12.08	903	924	883	802	723	771	809	819	RPAP3	RNA polymerase II associated protein 3 [Source:HGNC Symbol;Acc:HGNC:26151]	-	-	-	-	GO:0005829//cytosol;GO:0036157//outer dynein arm;GO:0097255//R2TP complex	GO:0005515//protein binding	GO:0070286//axonemal dynein complex assembly
ENSG00000005187	4.31	5.14	4.13	5.6	6.76	6.57	6.91	8.32	153.64	191.45	163	180.94	288.45	301.31	306.52	320.96	ACSM3	acyl-CoA synthetase medium chain family member 3 [Source:HGNC Symbol;Acc:HGNC:10522]	Metabolism;Metabolism	Global and overview maps;Carbohydrate metabolism	ko01100//Metabolic pathways;ko00650//Butanoate metabolism	K01896;K01896	GO:0005739//mitochondrion;GO:0005759//mitochondrial matrix	GO:0000166//nucleotide binding;GO:0003824//catalytic activity;GO:0004321//fatty-acyl-CoA synthase activity;GO:0004467//long-chain fatty acid-CoA ligase activity;GO:0005515//protein binding;GO:0005524//ATP binding;GO:0015645//fatty acid ligase activity;GO:0016874//ligase activity;GO:0046872//metal ion binding;GO:0047760//butyrate-CoA ligase activity;GO:0050218//propionate-CoA ligase activity	GO:0006629//lipid metabolic process;GO:0006631//fatty acid metabolic process;GO:0006633//fatty acid biosynthetic process;GO:0006637//acyl-CoA metabolic process;GO:0008217//regulation of blood pressure;GO:0042632//cholesterol homeostasis
ENSG00000005189	5.12	5.05	5.18	6.12	4.93	3.87	4.75	4.73	204.61	265	253	269	268	212	273	270.23	REXO5	RNA exonuclease 5 [Source:HGNC Symbol;Acc:HGNC:24661]	Genetic Information Processing	Translation	ko03008//Ribosome biogenesis in eukaryotes	K14570	GO:0005634//nucleus;GO:0005730//nucleolus;GO:0070062//extracellular exosome	GO:0003676//nucleic acid binding;GO:0003723//RNA binding;GO:0004518//nuclease activity;GO:0004527//exonuclease activity;GO:0016787//hydrolase activity	GO:0090305//nucleic acid phosphodiester bond hydrolysis
ENSG00000005194	27.17	33.53	36.74	35.53	33.4	26.04	26.47	31.38	1024	1489	1607	1454	1569	1320	1295	1557	CIAPIN1	cytokine induced apoptosis inhibitor 1 [Source:HGNC Symbol;Acc:HGNC:28050]	-	-	-	-	GO:0005634//nucleus;GO:0005654//nucleoplasm;GO:0005730//nucleolus;GO:0005737//cytoplasm;GO:0005739//mitochondrion;GO:0005758//mitochondrial intermembrane space	GO:0005515//protein binding;GO:0008168//methyltransferase activity;GO:0009055//electron transfer activity;GO:0046872//metal ion binding;GO:0051536//iron-sulfur cluster binding;GO:0051537//2 iron, 2 sulfur cluster binding;GO:0051539//4 iron, 4 sulfur cluster binding	GO:0006915//apoptotic process;GO:0016226//iron-sulfur cluster assembly;GO:0022900//electron transport chain;GO:0030097//hemopoiesis;GO:0043066//negative regulation of apoptotic process
ENSG00000005206	5.28	9.67	9.06	9.69	10.1	11.53	8.98	10.03	297	614	563	571	638	723	593	631.03	SPPL2B	signal peptide peptidase like 2B [Source:HGNC Symbol;Acc:HGNC:30627]	-	-	-	-	GO:0000139//Golgi membrane;GO:0005654//nucleoplasm;GO:0005764//lysosome;GO:0005765//lysosomal membrane;GO:0005768//endosome;GO:0005794//Golgi apparatus;GO:0005813//centrosome;GO:0005886//plasma membrane;GO:0010008//endosome membrane;GO:0015629//actin cytoskeleton;GO:0016020//membrane;GO:0016021//integral component of membrane;GO:0030660//Golgi-associated vesicle membrane;GO:0071458//integral comp…	GO:0004190//aspartic-type endopeptidase activity;GO:0005515//protein binding;GO:0008233//peptidase activity;GO:0016787//hydrolase activity;GO:0042500//aspartic endopeptidase activity, intramembrane cleaving;GO:0042803//protein homodimerization activity	GO:0006508//proteolysis;GO:0006509//membrane protein ectodomain proteolysis;GO:0010803//regulation of tumor necrosis factor-mediated signaling pathway;GO:0031293//membrane protein intracellular domain proteolysis;GO:0033619//membrane protein proteolysis;GO:0050776//regulation of immune response
ENSG00000005238	0.99	1.09	1.21	1.27	1.25	1.13	1.14	1.08	60	77	80	82	87	87	83	80	FAM214B	family with sequence similarity 214 member B [Source:HGNC Symbol;Acc:HGNC:25666]	-	-	-	-	GO:0005634//nucleus	GO:0005515//protein binding	-
ENSG00000005243	0	0.17	0.21	0	0	0.08	0.1	0.15	0	3	4	0	0	2	2	2	COPZ2	COPI coat complex subunit zeta 2 [Source:HGNC Symbol;Acc:HGNC:19356]	-	-	-	-	GO:0000139//Golgi membrane;GO:0005737//cytoplasm;GO:0005789//endoplasmic reticulum membrane;GO:0005794//Golgi apparatus;GO:0005801//cis-Golgi network;GO:0005829//cytosol;GO:0016020//membrane;GO:0030126//COPI vesicle coat;GO:0030133//transport vesicle;GO:0030663//COPI-coated vesicle membrane;GO:0031410//cytoplasmic vesicle;GO:0033116//endoplasmic reticulum-Golgi intermediate compartment membrane	-	GO:0006886//intracellular protein transport;GO:0006888//ER to Golgi vesicle-mediated transport;GO:0006890//retrograde vesicle-mediated transport, Golgi to ER;GO:0006891//intra-Golgi vesicle-mediated transport;GO:0015031//protein transport;GO:0016192//vesicle-mediated transport
ENSG00000005249	0.01	0.03	0.03	0.01	0.05	0.02	0.01	0.01	1	3	3	1	5	2	1	1	PRKAR2B	protein kinase cAMP-dependent type II regulatory subunit beta [Source:HGNC Symbol;Acc:HGNC:9392]	Organismal Systems	Endocrine system	ko04910//Insulin signaling pathway	K04739	GO:0005737//cytoplasm;GO:0005813//centrosome;GO:0005829//cytosol;GO:0005886//plasma membrane;GO:0005952//cAMP-dependent protein kinase complex;GO:0016020//membrane;GO:0030425//dendrite;GO:0043025//neuronal cell body;GO:0043197//dendritic spine;GO:0043198//dendritic shaft;GO:0045121//membrane raft;GO:0048471//perinuclear region of cytoplasm;GO:0070062//extracellular exosome;GO:0097546//ciliary bas…	GO:0000166//nucleotide binding;GO:0004862//cAMP-dependent protein kinase inhibitor activity;GO:0005515//protein binding;GO:0008603//cAMP-dependent protein kinase regulator activity;GO:0016301//kinase activity;GO:0019901//protein kinase binding;GO:0019904//protein domain specific binding;GO:0030552//cAMP binding;GO:0031625//ubiquitin protein ligase binding;GO:0034236//protein kinase A catalytic su…	GO:0000086//G2/M transition of mitotic cell cycle;GO:0001932//regulation of protein phosphorylation;GO:0003091//renal water homeostasis;GO:0006631//fatty acid metabolic process;GO:0007596//blood coagulation;GO:0007612//learning;GO:0010389//regulation of G2/M transition of mitotic cell cycle;GO:0010738//regulation of protein kinase A signaling;GO:0016310//phosphorylation;GO:0034199//activation of …
ENSG00000005302	4.61	4.45	4.01	4.55	4.09	4.26	3.83	4.08	219	237	231	228	237	265	237	247	MSL3	MSL complex subunit 3 [Source:HGNC Symbol;Acc:HGNC:7370]	-	-	-	-	GO:0000123//histone acetyltransferase complex;GO:0005634//nucleus;GO:0005654//nucleoplasm;GO:0035267//NuA4 histone acetyltransferase complex;GO:0072487//MSL complex	GO:0003677//DNA binding;GO:0005515//protein binding;GO:0035064//methylated histone binding;GO:0046972//histone acetyltransferase activity (H4-K16 specific)	GO:0006325//chromatin organization;GO:0006342//chromatin silencing;GO:0006355//regulation of transcription, DNA-templated;GO:0016573//histone acetylation;GO:0016575//histone deacetylation;GO:0043967//histone H4 acetylation;GO:0043968//histone H2A acetylation;GO:0043984//histone H4-K16 acetylation
ENSG00000005339	18.38	16.15	15.19	16.25	16.08	17.67	15.98	14.99	2416	2963	2854	2711	2950	3676	3115	2887	CREBBP	CREB binding protein [Source:HGNC Symbol;Acc:HGNC:2348]	Human Diseases;Human Diseases;Human Diseases;Human Diseases;Human Diseases;Environmental Information Processing;Human Diseases;Human Diseases;Human Diseases;Human Diseases;Environmental Information Processing;Environmental Information Processing;Human Diseases;Environmental Information Processing;Cellular Processes;Organismal Systems;Organismal Systems;Environmental Information Processing;Organis…	Cancers;Infectious diseases;Neurodegenerative diseases;Infectious diseases;Infectious diseases;Signal transduction;Cancers;Infectious diseases;Infectious diseases;Cancers;Signal transduction;Signal transduction;Infectious diseases;Signal transduction;Cell growth and death;Endocrine system;Endocrine system;Signal transduction;Endocrine system;Cancers;Endocrine system;Signal transduction;Cancers;Ce…	ko05200//Pathways in cancer;ko05165//Human papillomavirus infection;ko05016//Huntington disease;ko05152//Tuberculosis;ko05166//HTLV-I infection;ko04024//cAMP signaling pathway;ko05203//Viral carcinogenesis;ko05167//Kaposi sarcoma-associated herpesvirus infection;ko05164//Influenza A;ko05206//MicroRNAs in cancer;ko04630//Jak-STAT signaling pathway;ko04310//Wnt signaling pathway;ko05161//Hepatitis …	K04498;K04498;K04498;K04498;K04498;K04498;K04498;K04498;K04498;K04498;K04498;K04498;K04498;K04498;K04498;K04498;K04498;K04498;K04498;K04498;K04498;K04498;K04498;K04498;K04498;K04498	GO:0000123//histone acetyltransferase complex;GO:0000785//chromatin;GO:0005634//nucleus;GO:0005654//nucleoplasm;GO:0005667//transcription factor complex;GO:0005737//cytoplasm;GO:0016604//nuclear body	GO:0001085//RNA polymerase II transcription factor binding;GO:0001102//RNA polymerase II activating transcription factor binding;GO:0002039//p53 binding;GO:0003682//chromatin binding;GO:0003684//damaged DNA binding;GO:0003712//transcription coregulator activity;GO:0003713//transcription coactivator activity;GO:0003714//transcription corepressor activity;GO:0004402//histone acetyltransferase activ…	GO:0000122//negative regulation of transcription by RNA polymerase II;GO:0001666//response to hypoxia;GO:0002223//stimulatory C-type lectin receptor signaling pathway;GO:0006355//regulation of transcription, DNA-templated;GO:0006367//transcription initiation from RNA polymerase II promoter;GO:0006473//protein acetylation;GO:0007165//signal transduction;GO:0007219//Notch signaling pathway;GO:00072…
ENSG00000005379	0.01	0.03	0.07	0.06	0.08	0.11	0.11	0.06	1	4	5	9	9	7	9	6	TSPOAP1	TSPO associated protein 1 [Source:HGNC Symbol;Acc:HGNC:16831]	-	-	-	-	GO:0005737//cytoplasm;GO:0005739//mitochondrion;GO:0005829//cytosol;GO:0044305//calyx of Held;GO:0098978//glutamatergic synapse	GO:0005515//protein binding;GO:0030156//benzodiazepine receptor binding;GO:0099626//voltage-gated calcium channel activity involved in regulation of presynaptic cytosolic calcium levels	GO:0006700//C21-steroid hormone biosynthetic process;GO:0007269//neurotransmitter secretion;GO:0008150//biological_process;GO:0014047//glutamate secretion;GO:0099509//regulation of presynaptic cytosolic calcium ion concentration
ENSG00000005381	0	0	0	0	0	0	0.02	0	0	0	0	0	0	0	2	0	MPO	myeloperoxidase [Source:HGNC Symbol;Acc:HGNC:7218]	Human Diseases;Cellular Processes;Metabolism;Human Diseases	Cancers;Transport and catabolism;Xenobiotics biodegradation and metabolism;Cancers	ko05202//Transcriptional misregulation in cancers;ko04145//Phagosome;ko00983//Drug metabolism - other enzymes;ko05221//Acute myeloid leukemia	K10789;K10789;K10789;K10789	GO:0005576//extracellular region;GO:0005615//extracellular space;GO:0005634//nucleus;GO:0005654//nucleoplasm;GO:0005764//lysosome;GO:0030141//secretory granule;GO:0035578//azurophil granule lumen;GO:0042582//azurophil granule;GO:0043231//intracellular membrane-bounded organelle;GO:0070062//extracellular exosome;GO:0097013//phagocytic vesicle lumen	GO:0003682//chromatin binding;GO:0004601//peroxidase activity;GO:0005515//protein binding;GO:0008201//heparin binding;GO:0016491//oxidoreductase activity;GO:0020037//heme binding;GO:0046872//metal ion binding	GO:0001878//response to yeast;GO:0002149//hypochlorous acid biosynthetic process;GO:0002679//respiratory burst involved in defense response;GO:0006952//defense response;GO:0006979//response to oxidative stress;GO:0007568//aging;GO:0009612//response to mechanical stimulus;GO:0019430//removal of superoxide radicals;GO:0032094//response to food;GO:0032496//response to lipopolysaccharide;GO:0034374//…
ENSG00000005421	0.19	0.26	0.23	0.17	0.13	0.16	0.09	0.13	9	15	10	9	5	6	5	7	PON1	paraoxonase 1 [Source:HGNC Symbol;Acc:HGNC:9204]	-	-	-	-	GO:0005576//extracellular region;GO:0005615//extracellular space;GO:0034364//high-density lipoprotein particle;GO:0034366//spherical high-density lipoprotein particle;GO:0043231//intracellular membrane-bounded organelle;GO:0070062//extracellular exosome;GO:0072562//blood microparticle	GO:0004063//aryldialkylphosphatase activity;GO:0004064//arylesterase activity;GO:0005509//calcium ion binding;GO:0005543//phospholipid binding;GO:0016787//hydrolase activity;GO:0042803//protein homodimerization activity;GO:0046872//metal ion binding;GO:0102007//acyl-L-homoserine-lactone lactonohydrolase activity	GO:0006629//lipid metabolic process;GO:0008203//cholesterol metabolic process;GO:0009636//response to toxic substance;GO:0010875//positive regulation of cholesterol efflux;GO:0016311//dephosphorylation;GO:0019372//lipoxygenase pathway;GO:0019439//aromatic compound catabolic process;GO:0031667//response to nutrient levels;GO:0032411//positive regulation of transporter activity;GO:0046395//carboxyl…
ENSG00000005436	20.63	17.08	17.34	19.42	15.34	15.16	15.69	15.22	951	928	842	807	712	818	806	828	GCFC2	GC-rich sequence DNA-binding factor 2 [Source:HGNC Symbol;Acc:HGNC:1317]	-	-	-	-	GO:0005634//nucleus;GO:0005654//nucleoplasm;GO:0005730//nucleolus;GO:0005829//cytosol;GO:0071008//U2-type post-mRNA release spliceosomal complex	GO:0003677//DNA binding;GO:0005515//protein binding	GO:0000245//spliceosomal complex assembly;GO:0000398//mRNA splicing, via spliceosome;GO:0006355//regulation of transcription, DNA-templated;GO:0006397//mRNA processing;GO:0008380//RNA splicing;GO:0045892//negative regulation of transcription, DNA-templated
ENSG00000005448	1.03	1.71	1.83	1.01	2.55	3.18	3.23	2.98	23	47	49	25	72	94	91	86	WDR54	WD repeat domain 54 [Source:HGNC Symbol;Acc:HGNC:25770]	-	-	-	-	GO:0031982//vesicle	GO:0005515//protein binding;GO:0042803//protein homodimerization activity	GO:0002091//negative regulation of receptor internalization;GO:0042058//regulation of epidermal growth factor receptor signaling pathway;GO:0043408//regulation of MAPK cascade
ENSG00000005469	3.25	3.56	3.26	2.93	2.37	2.23	2.44	2.46	184	243	224	187	178	158	181	190	CROT	carnitine O-octanoyltransferase [Source:HGNC Symbol;Acc:HGNC:2366]	Cellular Processes	Transport and catabolism	ko04146//Peroxisome	K05940	GO:0005777//peroxisome;GO:0005782//peroxisomal matrix;GO:0005829//cytosol;GO:0043231//intracellular membrane-bounded organelle	GO:0005515//protein binding;GO:0008458//carnitine O-octanoyltransferase activity;GO:0016740//transferase activity;GO:0016746//transferase activity, transferring acyl groups	GO:0006091//generation of precursor metabolites and energy;GO:0006625//protein targeting to peroxisome;GO:0006629//lipid metabolic process;GO:0006631//fatty acid metabolic process;GO:0006635//fatty acid beta-oxidation;GO:0009437//carnitine metabolic process;GO:0015908//fatty acid transport;GO:0015936//coenzyme A metabolic process;GO:0033540//fatty acid beta-oxidation using acyl-CoA oxidase;GO:005…
ENSG00000005471	3.69	3.39	3.57	3.64	4.03	3.81	3.91	4.94	245	301.23	255	287	380	360	368	426	ABCB4	ATP binding cassette subfamily B member 4 [Source:HGNC Symbol;Acc:HGNC:45]	Organismal Systems;Environmental Information Processing	Digestive system;Membrane transport	ko04976//Bile secretion;ko02010//ABC transporters	K05659;K05659	GO:0005654//nucleoplasm;GO:0005737//cytoplasm;GO:0005829//cytosol;GO:0005886//plasma membrane;GO:0005887//integral component of plasma membrane;GO:0005925//focal adhesion;GO:0015629//actin cytoskeleton;GO:0016020//membrane;GO:0016021//integral component of membrane;GO:0016324//apical plasma membrane;GO:0030136//clathrin-coated vesicle;GO:0031410//cytoplasmic vesicle;GO:0045121//membrane raft;GO:0…	GO:0000166//nucleotide binding;GO:0005515//protein binding;GO:0005524//ATP binding;GO:0005548//phospholipid transporter activity;GO:0016887//ATPase activity;GO:0042626//ATPase activity, coupled to transmembrane movement of substances;GO:0090554//phosphatidylcholine-translocating ATPase activity	GO:0006629//lipid metabolic process;GO:0006869//lipid transport;GO:0019216//regulation of lipid metabolic process;GO:0032376//positive regulation of cholesterol transport;GO:0032782//bile acid secretion;GO:0045332//phospholipid translocation;GO:0055085//transmembrane transport;GO:0055088//lipid homeostasis;GO:0061092//positive regulation of phospholipid translocation;GO:0099040//ceramide transloc…
ENSG00000005483	15.95	14.35	13.6	13.99	14.2	15.23	14.98	15.49	1698	1752	1507	1488	1554	1963	1796	1778	KMT2E	lysine methyltransferase 2E (inactive) [Source:HGNC Symbol;Acc:HGNC:18541]	Metabolism;Metabolism	Global and overview maps;Amino acid metabolism	ko01100//Metabolic pathways;ko00310//Lysine degradation	K09189;K09189	GO:0000785//chromatin;GO:0005634//nucleus;GO:0005654//nucleoplasm;GO:0005694//chromosome;GO:0005737//cytoplasm;GO:0005815//microtubule organizing center;GO:0005856//cytoskeleton;GO:0005886//plasma membrane;GO:0016020//membrane;GO:0016604//nuclear body;GO:0016607//nuclear speck;GO:0032991//protein-containing complex;GO:0035327//transcriptionally active chromatin	GO:0005515//protein binding;GO:0019899//enzyme binding;GO:0035064//methylated histone binding;GO:0046872//metal ion binding	GO:0002446//neutrophil mediated immunity;GO:0006306//DNA methylation;GO:0006325//chromatin organization;GO:0007049//cell cycle;GO:0007050//cell cycle arrest;GO:0030218//erythrocyte differentiation;GO:0034968//histone lysine methylation;GO:0042119//neutrophil activation;GO:0045652//regulation of megakaryocyte differentiation;GO:0045893//positive regulation of transcription, DNA-templated;GO:190008…
ENSG00000005486	15.89	14.9	15.11	14.87	17.8	18.43	15.77	15.11	543	626	616	559	779	860	694	681	RHBDD2	rhomboid domain containing 2 [Source:HGNC Symbol;Acc:HGNC:23082]	-	-	-	-	GO:0000139//Golgi membrane;GO:0000839//Hrd1p ubiquitin ligase ERAD-L complex;GO:0005654//nucleoplasm;GO:0005794//Golgi apparatus;GO:0016020//membrane;GO:0016021//integral component of membrane;GO:0030176//integral component of endoplasmic reticulum membrane;GO:0048471//perinuclear region of cytoplasm	GO:0004252//serine-type endopeptidase activity;GO:0005515//protein binding;GO:0051787//misfolded protein binding;GO:1990381//ubiquitin-specific protease binding	GO:0030433//ubiquitin-dependent ERAD pathway;GO:0030968//endoplasmic reticulum unfolded protein response
ENSG00000005513	0.08	0.11	0.04	0.17	0.18	0.11	0.19	0.21	5	8	3	11	14	9	15	17	SOX8	SRY-box transcription factor 8 [Source:HGNC Symbol;Acc:HGNC:11203]	-	-	-	-	GO:0000785//chromatin;GO:0005634//nucleus;GO:0005667//transcription factor complex;GO:0005737//cytoplasm	GO:0000978//RNA polymerase II proximal promoter sequence-specific DNA binding;GO:0000981//DNA-binding transcription factor activity, RNA polymerase II-specific;GO:0000987//proximal promoter sequence-specific DNA binding;GO:0003677//DNA binding;GO:0003700//DNA-binding transcription factor activity;GO:0008134//transcription factor binding;GO:0043565//sequence-specific DNA binding;GO:1990837//sequen…	GO:0000122//negative regulation of transcription by RNA polymerase II;GO:0001649//osteoblast differentiation;GO:0001701//in utero embryonic development;GO:0001755//neural crest cell migration;GO:0002009//morphogenesis of an epithelium;GO:0006355//regulation of transcription, DNA-templated;GO:0006357//regulation of transcription by RNA polymerase II;GO:0007165//signal transduction;GO:0007283//sper…
ENSG00000005700	22.1	18.46	18.21	18.33	16.87	14.41	15.71	17.77	2517	2543	2463	2252	2348	1992	2133	2642	IBTK	inhibitor of Bruton tyrosine kinase [Source:HGNC Symbol;Acc:HGNC:17853]	-	-	-	-	GO:0005634//nucleus;GO:0005654//nucleoplasm;GO:0005737//cytoplasm;GO:0016020//membrane	GO:0005515//protein binding;GO:0019901//protein kinase binding;GO:0030292//protein tyrosine kinase inhibitor activity	GO:0001933//negative regulation of protein phosphorylation;GO:0051209//release of sequestered calcium ion into cytosol;GO:0061099//negative regulation of protein tyrosine kinase activity
ENSG00000005801	12.24	10.22	9.93	9.59	7.44	8.83	9.71	9.62	482	451	431	422	362	465	421	409	ZNF195	zinc finger protein 195 [Source:HGNC Symbol;Acc:HGNC:12986]	Human Diseases	Infectious diseases	ko05168//Herpes simplex infection	K09228	GO:0000785//chromatin;GO:0005634//nucleus	GO:0000978//RNA polymerase II proximal promoter sequence-specific DNA binding;GO:0000981//DNA-binding transcription factor activity, RNA polymerase II-specific;GO:0003676//nucleic acid binding;GO:0003677//DNA binding;GO:0008270//zinc ion binding;GO:0046872//metal ion binding	GO:0006355//regulation of transcription, DNA-templated;GO:0006357//regulation of transcription by RNA polymerase II
ENSG00000005810	11.21	9.1	9.4	10.54	8.5	7.63	8.1	8.62	2252.27	2503.79	2412.97	2292.17	2293.49	2295	2295.54	2365	MYCBP2	MYC binding protein 2 [Source:HGNC Symbol;Acc:HGNC:23386]	Organismal Systems	Development and regeneration	ko04361//Axon regeneration	K10693	GO:0005634//nucleus;GO:0005654//nucleoplasm;GO:0005737//cytoplasm;GO:0005856//cytoskeleton;GO:0015630//microtubule cytoskeleton;GO:0016020//membrane;GO:0030424//axon;GO:0042995//cell projection;GO:0043231//intracellular membrane-bounded organelle	GO:0005085//guanyl-nucleotide exchange factor activity;GO:0005515//protein binding;GO:0008270//zinc ion binding;GO:0016740//transferase activity;GO:0031267//small GTPase binding;GO:0042802//identical protein binding;GO:0046872//metal ion binding;GO:0061630//ubiquitin protein ligase activity	GO:0008045//motor neuron axon guidance;GO:0016567//protein ubiquitination;GO:0021785//branchiomotor neuron axon guidance;GO:0021952//central nervous system projection neuron axonogenesis;GO:0031398//positive regulation of protein ubiquitination;GO:0032880//regulation of protein localization;GO:0032922//circadian regulation of gene expression;GO:0042177//negative regulation of protein catabolic pr…
ENSG00000005812	10	8.16	8.8	7.81	6.68	6.54	7.27	7.65	675	655	660	558	535	532.98	577.98	672	FBXL3	F-box and leucine rich repeat protein 3 [Source:HGNC Symbol;Acc:HGNC:13599]	Organismal Systems	Environmental adaptation	ko04710//Circadian rhythm	K10269	GO:0000151//ubiquitin ligase complex;GO:0005634//nucleus;GO:0005737//cytoplasm;GO:0005829//cytosol;GO:0016604//nuclear body;GO:0019005//SCF ubiquitin ligase complex	GO:0004842//ubiquitin-protein transferase activity;GO:0005515//protein binding	GO:0000086//G2/M transition of mitotic cell cycle;GO:0000209//protein polyubiquitination;GO:0016567//protein ubiquitination;GO:0031146//SCF-dependent proteasomal ubiquitin-dependent protein catabolic process;GO:0031648//protein destabilization;GO:0042752//regulation of circadian rhythm;GO:0043153//entrainment of circadian clock by photoperiod;GO:0043161//proteasome-mediated ubiquitin-dependent pr…
ENSG00000005844	0.97	1.2	1.61	1.13	2.09	1.59	1.71	1.66	77	120	104	117	175	191	151	175	ITGAL	integrin subunit alpha L [Source:HGNC Symbol;Acc:HGNC:6148]	Human Diseases;Human Diseases;Environmental Information Processing;Cellular Processes;Organismal Systems;Human Diseases;Human Diseases;Environmental Information Processing;Human Diseases;Organismal Systems;Human Diseases	Infectious diseases;Infectious diseases;Signal transduction;Cell motility;Immune system;Infectious diseases;Immune diseases;Signaling molecules and interaction;Cardiovascular diseases;Immune system;Infectious diseases	ko05169//Epstein-Barr virus infection;ko05166//HTLV-I infection;ko04015//Rap1 signaling pathway;ko04810//Regulation of actin cytoskeleton;ko04650//Natural killer cell mediated cytotoxicity;ko05150//Staphylococcus aureus infection;ko05323//Rheumatoid arthritis;ko04514//Cell adhesion molecules (CAMs);ko05416//Viral myocarditis;ko04670//Leukocyte transendothelial migration;ko05144//Malaria	K05718;K05718;K05718;K05718;K05718;K05718;K05718;K05718;K05718;K05718;K05718	GO:0005886//plasma membrane;GO:0008305//integrin complex;GO:0009986//cell surface;GO:0016020//membrane;GO:0016021//integral component of membrane;GO:0034687//integrin alphaL-beta2 complex;GO:0035579//specific granule membrane;GO:0070062//extracellular exosome	GO:0005515//protein binding;GO:0030369//ICAM-3 receptor activity;GO:0044877//protein-containing complex binding;GO:0046872//metal ion binding;GO:0050839//cell adhesion molecule binding	GO:0002291//T cell activation via T cell receptor contact with antigen bound to MHC molecule on antigen presenting cell;GO:0006909//phagocytosis;GO:0006954//inflammatory response;GO:0007155//cell adhesion;GO:0007157//heterophilic cell-cell adhesion via plasma membrane cell adhesion molecules;GO:0007159//leukocyte cell-cell adhesion;GO:0007160//cell-matrix adhesion;GO:0007165//signal transduction;…
ENSG00000005882	9.13	10.45	8.41	7.78	9.84	13.88	9.55	10.28	320	491.33	435	441	677	772	656	568.61	PDK2	pyruvate dehydrogenase kinase 2 [Source:HGNC Symbol;Acc:HGNC:8810]	-	-	-	-	GO:0005654//nucleoplasm;GO:0005739//mitochondrion;GO:0005759//mitochondrial matrix;GO:0005829//cytosol;GO:0005967//mitochondrial pyruvate dehydrogenase complex	GO:0000166//nucleotide binding;GO:0004672//protein kinase activity;GO:0004674//protein serine/threonine kinase activity;GO:0004740//pyruvate dehydrogenase (acetyl-transferring) kinase activity;GO:0005515//protein binding;GO:0005524//ATP binding;GO:0016301//kinase activity;GO:0016740//transferase activity;GO:0042803//protein homodimerization activity	GO:0005975//carbohydrate metabolic process;GO:0006006//glucose metabolic process;GO:0006111//regulation of gluconeogenesis;GO:0006468//protein phosphorylation;GO:0006885//regulation of pH;GO:0008286//insulin receptor signaling pathway;GO:0010510//regulation of acetyl-CoA biosynthetic process from pyruvate;GO:0010565//regulation of cellular ketone metabolic process;GO:0010906//regulation of glucos…
ENSG00000005884	0.1	0.38	0.4	0.33	0.26	0.41	0.33	0.12	10	30	30	35	32	53	27	15	ITGA3	integrin subunit alpha 3 [Source:HGNC Symbol;Acc:HGNC:6139]	Human Diseases;Environmental Information Processing;Human Diseases;Cellular Processes;Cellular Processes;Organismal Systems;Human Diseases;Human Diseases;Human Diseases;Environmental Information Processing;Human Diseases	Cancers;Signal transduction;Infectious diseases;Cell motility;Cellular community - eukaryotes;Immune system;Cardiovascular diseases;Cancers;Cardiovascular diseases;Signaling molecules and interaction;Cardiovascular diseases	ko05200//Pathways in cancer;ko04151//PI3K-Akt signaling pathway;ko05165//Human papillomavirus infection;ko04810//Regulation of actin cytoskeleton;ko04510//Focal adhesion;ko04640//Hematopoietic cell lineage;ko05414//Dilated cardiomyopathy (DCM);ko05222//Small cell lung cancer;ko05410//Hypertrophic cardiomyopathy (HCM);ko04512//ECM-receptor interaction;ko05412//Arrhythmogenic right ventricular card…	K06482;K06482;K06482;K06482;K06482;K06482;K06482;K06482;K06482;K06482;K06482	GO:0005886//plasma membrane;GO:0005925//focal adhesion;GO:0008305//integrin complex;GO:0009897//external side of plasma membrane;GO:0009986//cell surface;GO:0016020//membrane;GO:0016021//integral component of membrane;GO:0016323//basolateral plasma membrane;GO:0030054//cell junction;GO:0030426//growth cone;GO:0031527//filopodium membrane;GO:0034667//integrin alpha3-beta1 complex;GO:0042995//cell …	GO:0001968//fibronectin binding;GO:0002020//protease binding;GO:0005178//integrin binding;GO:0005515//protein binding;GO:0005518//collagen binding;GO:0019904//protein domain specific binding;GO:0043236//laminin binding;GO:0044877//protein-containing complex binding;GO:0046872//metal ion binding;GO:0046982//protein heterodimerization activity	GO:0001764//neuron migration;GO:0007155//cell adhesion;GO:0007160//cell-matrix adhesion;GO:0007229//integrin-mediated signaling pathway;GO:0007507//heart development;GO:0007613//memory;GO:0010628//positive regulation of gene expression;GO:0010634//positive regulation of epithelial cell migration;GO:0010811//positive regulation of cell-substrate adhesion;GO:0010976//positive regulation of neuron p…
ENSG00000005889	5.65	5.22	5.12	5.5	5.88	6.73	6.58	5.89	584	670	648	630.62	741	674	748	799	ZFX	zinc finger protein X-linked [Source:HGNC Symbol;Acc:HGNC:12869]	-	-	-	-	GO:0005634//nucleus;GO:0005654//nucleoplasm;GO:0005694//chromosome;GO:0005730//nucleolus	GO:0003677//DNA binding;GO:0043035//chromatin insulator sequence binding;GO:0046872//metal ion binding	GO:0001541//ovarian follicle development;GO:0006355//regulation of transcription, DNA-templated;GO:0006357//regulation of transcription by RNA polymerase II;GO:0007281//germ cell development;GO:0007283//spermatogenesis;GO:0009566//fertilization;GO:0009791//post-embryonic development;GO:0035264//multicellular organism growth;GO:0048599//oocyte development;GO:0048872//homeostasis of number of cells…
ENSG00000005893	54.84	50.73	47.04	49.54	48.97	49.62	47.23	48.48	4218	4393	4330	3972	4141	4195	4096	4487	LAMP2	lysosomal associated membrane protein 2 [Source:HGNC Symbol;Acc:HGNC:6501]	Human Diseases;Cellular Processes;Cellular Processes;Cellular Processes	Infectious diseases;Transport and catabolism;Transport and catabolism;Transport and catabolism	ko05152//Tuberculosis;ko04145//Phagosome;ko04140//Autophagy - animal;ko04142//Lysosome	K06528;K06528;K06528;K06528	GO:0000421//autophagosome membrane;GO:0005615//extracellular space;GO:0005764//lysosome;GO:0005765//lysosomal membrane;GO:0005768//endosome;GO:0005770//late endosome;GO:0005802//trans-Golgi network;GO:0005886//plasma membrane;GO:0010008//endosome membrane;GO:0016020//membrane;GO:0016021//integral component of membrane;GO:0030670//phagocytic vesicle membrane;GO:0031088//platelet dense granule memb…	GO:0005515//protein binding;GO:0019899//enzyme binding;GO:0019904//protein domain specific binding	GO:0002576//platelet degranulation;GO:0006605//protein targeting;GO:0006914//autophagy;GO:0009267//cellular response to starvation;GO:0017038//protein import;GO:0031333//negative regulation of protein complex assembly;GO:0031647//regulation of protein stability;GO:0043312//neutrophil degranulation;GO:0046716//muscle cell cellular homeostasis;GO:0050821//protein stabilization;GO:0061684//chaperone…
ENSG00000005961	0.03	0.02	0.04	0.05	0.03	0.06	0.08	0.07	2	1	3	3	3	4	6	5	ITGA2B	integrin subunit alpha 2b [Source:HGNC Symbol;Acc:HGNC:6138]	Human Diseases;Environmental Information Processing;Human Diseases;Environmental Information Processing;Cellular Processes;Cellular Processes;Organismal Systems;Human Diseases;Human Diseases;Organismal Systems;Human Diseases;Human Diseases;Environmental Information Processing;Human Diseases	Cancers;Signal transduction;Infectious diseases;Signal transduction;Cell motility;Cellular community - eukaryotes;Immune system;Cardiovascular diseases;Cardiovascular diseases;Immune system;Cancers;Cardiovascular diseases;Signaling molecules and interaction;Cardiovascular diseases	ko05200//Pathways in cancer;ko04151//PI3K-Akt signaling pathway;ko05165//Human papillomavirus infection;ko04015//Rap1 signaling pathway;ko04810//Regulation of actin cytoskeleton;ko04510//Focal adhesion;ko04640//Hematopoietic cell lineage;ko05414//Dilated cardiomyopathy (DCM);ko05418//Fluid shear stress and atherosclerosis;ko04611//Platelet activation;ko05222//Small cell lung cancer;ko05410//Hyper…	K06476;K06476;K06476;K06476;K06476;K06476;K06476;K06476;K06476;K06476;K06476;K06476;K06476;K06476	GO:0005886//plasma membrane;GO:0005925//focal adhesion;GO:0008305//integrin complex;GO:0009897//external side of plasma membrane;GO:0009986//cell surface;GO:0016020//membrane;GO:0016021//integral component of membrane;GO:0031092//platelet alpha granule membrane;GO:0070062//extracellular exosome;GO:0072562//blood microparticle	GO:0005515//protein binding;GO:0042802//identical protein binding;GO:0046872//metal ion binding;GO:0050840//extracellular matrix binding;GO:0070051//fibrinogen binding	GO:0002576//platelet degranulation;GO:0002687//positive regulation of leukocyte migration;GO:0007155//cell adhesion;GO:0007160//cell-matrix adhesion;GO:0007229//integrin-mediated signaling pathway;GO:0030198//extracellular matrix organization;GO:0045652//regulation of megakaryocyte differentiation;GO:0070527//platelet aggregation
ENSG00000005981	0.07	0.13	0.22	0.14	0.08	0.1	0.14	0.28	5	12	12	9	8	7	12	17	ASB4	ankyrin repeat and SOCS box containing 4 [Source:HGNC Symbol;Acc:HGNC:16009]	-	-	-	-	GO:0005829//cytosol;GO:0031462//Cul2-RING ubiquitin ligase complex;GO:0031466//Cul5-RING ubiquitin ligase complex	GO:0004842//ubiquitin-protein transferase activity;GO:0005515//protein binding;GO:0019899//enzyme binding;GO:0031625//ubiquitin protein ligase binding;GO:0061630//ubiquitin protein ligase activity	GO:0016567//protein ubiquitination;GO:0035556//intracellular signal transduction;GO:0043687//post-translational protein modification;GO:0051865//protein autoubiquitination;GO:2001214//positive regulation of vasculogenesis
ENSG00000006007	29.63	29.4	29.2	29.09	28.58	26.07	26.82	28.68	1556	1828	1795	1620	1902	1836	1770	1921	GDE1	glycerophosphodiester phosphodiesterase 1 [Source:HGNC Symbol;Acc:HGNC:29644]	-	-	-	-	GO:0005886//plasma membrane;GO:0016020//membrane;GO:0016021//integral component of membrane;GO:0030659//cytoplasmic vesicle membrane;GO:0031410//cytoplasmic vesicle	GO:0004622//lysophospholipase activity;GO:0005515//protein binding;GO:0008081//phosphoric diester hydrolase activity;GO:0008889//glycerophosphodiester phosphodiesterase activity;GO:0016787//hydrolase activity;GO:0046872//metal ion binding;GO:0047395//glycerophosphoinositol glycerophosphodiesterase activity	GO:0006580//ethanolamine metabolic process;GO:0006629//lipid metabolic process;GO:0006644//phospholipid metabolic process;GO:0046475//glycerophospholipid catabolic process;GO:0070291//N-acylethanolamine metabolic process
ENSG00000006015	1.74	5.25	5.34	4.94	5.74	3.85	6.35	5.19	25	93	87	77	104	76	109	100	REX1BD	required for excision 1-B domain containing [Source:HGNC Symbol;Acc:HGNC:26098]	-	-	-	-	-	GO:0005515//protein binding	-
ENSG00000006016	78.22	85.7	85.21	87.17	112.62	137.71	120.28	100.22	2045	3129	2940	2809	4272	5048	4363	3865	CRLF1	cytokine receptor like factor 1 [Source:HGNC Symbol;Acc:HGNC:2364]	-	-	-	-	GO:0005576//extracellular region;GO:0005615//extracellular space;GO:0005829//cytosol;GO:0009897//external side of plasma membrane;GO:0043235//receptor complex;GO:0097058//CRLF-CLCF1 complex	GO:0004896//cytokine receptor activity;GO:0005125//cytokine activity;GO:0005127//ciliary neurotrophic factor receptor binding;GO:0005515//protein binding;GO:0019955//cytokine binding	GO:0001657//ureteric bud development;GO:0008284//positive regulation of cell proliferation;GO:0019221//cytokine-mediated signaling pathway;GO:0042531//positive regulation of tyrosine phosphorylation of STAT protein;GO:0043524//negative regulation of neuron apoptotic process;GO:0070106//interleukin-27-mediated signaling pathway;GO:2000672//negative regulation of motor neuron apoptotic process
ENSG00000006025	0.77	1.07	1.22	1.24	0.96	1.1	1.1	0.97	55	94	104	98	87	108	101	90	OSBPL7	oxysterol binding protein like 7 [Source:HGNC Symbol;Acc:HGNC:16387]	-	-	-	-	GO:0005654//nucleoplasm;GO:0005737//cytoplasm;GO:0005776//autophagosome;GO:0005783//endoplasmic reticulum;GO:0005789//endoplasmic reticulum membrane;GO:0005829//cytosol;GO:0005886//plasma membrane;GO:0016020//membrane;GO:0043231//intracellular membrane-bounded organelle;GO:0097038//perinuclear endoplasmic reticulum	GO:0005515//protein binding;GO:0008289//lipid binding;GO:0015248//sterol transporter activity;GO:0015485//cholesterol binding;GO:0032934//sterol binding	GO:0006699//bile acid biosynthetic process;GO:0006869//lipid transport;GO:0010506//regulation of autophagy;GO:0015918//sterol transport;GO:0071397//cellular response to cholesterol;GO:1901800//positive regulation of proteasomal protein catabolic process
ENSG00000006042	34.5	43.7	47.73	46.18	53.24	45.84	46.42	47.8	939	1397	1528	1373	1750	1538	1540	1652	TMEM98	transmembrane protein 98 [Source:HGNC Symbol;Acc:HGNC:24529]	-	-	-	-	GO:0005576//extracellular region;GO:0005615//extracellular space;GO:0005783//endoplasmic reticulum;GO:0005789//endoplasmic reticulum membrane;GO:0005886//plasma membrane;GO:0016020//membrane;GO:0016021//integral component of membrane;GO:0070062//extracellular exosome	GO:0005515//protein binding	GO:0010955//negative regulation of protein processing;GO:0031642//negative regulation of myelination;GO:0045063//T-helper 1 cell differentiation;GO:0048715//negative regulation of oligodendrocyte differentiation;GO:1900181//negative regulation of protein localization to nucleus
ENSG00000006047	0	0.15	0.41	0.08	0.19	0.08	0.24	0.21	0	6	8	3	8	2	7	9	YBX2	Y-box binding protein 2 [Source:HGNC Symbol;Acc:HGNC:17948]	-	-	-	-	GO:0005634//nucleus;GO:0005737//cytoplasm	GO:0003676//nucleic acid binding;GO:0003677//DNA binding;GO:0003723//RNA binding	GO:0006366//transcription by RNA polymerase II;GO:0007283//spermatogenesis;GO:0009386//translational attenuation;GO:0010468//regulation of gene expression;GO:0048599//oocyte development;GO:0120162//positive regulation of cold-induced thermogenesis
ENSG00000006059	0	0	0	0	0	0	0	0	0	0	0	0	0	0	0	0	KRT33A	keratin 33A [Source:HGNC Symbol;Acc:HGNC:6450]	Human Diseases;Organismal Systems	Infectious diseases;Endocrine system	ko05150//Staphylococcus aureus infection;ko04915//Estrogen signaling pathway	K07604;K07604	GO:0005615//extracellular space;GO:0005829//cytosol;GO:0005882//intermediate filament	GO:0005198//structural molecule activity	GO:0031424//keratinization;GO:0070268//cornification
ENSG00000006062	1.17	1.8	1.57	1.78	1.53	1.43	1.42	1.5	101	188	158	160	164	169	154	158	MAP3K14	mitogen-activated protein kinase kinase kinase 14 [Source:HGNC Symbol;Acc:HGNC:6853]	Environmental Information Processing;Human Diseases;Human Diseases;Environmental Information Processing;Cellular Processes;Organismal Systems;Organismal Systems;Environmental Information Processing;Organismal Systems;Organismal Systems;Human Diseases	Signal transduction;Infectious diseases;Infectious diseases;Signal transduction;Cell growth and death;Development;Immune system;Signal transduction;Immune system;Immune system;Infectious diseases	ko04010//MAPK signaling pathway;ko05169//Epstein-Barr virus infection;ko05166//HTLV-I infection;ko04064//NF-kappa B signaling pathway;ko04210//Apoptosis;ko04380//Osteoclast differentiation;ko04672//Intestinal immune network for IgA production;ko04668//TNF signaling pathway;ko04660//T cell receptor signaling pathway;ko04625//C-type lectin receptor signaling pathway;ko05120//Epithelial cell signali…	K04466;K04466;K04466;K04466;K04466;K04466;K04466;K04466;K04466;K04466;K04466	GO:0001650//fibrillar center;GO:0005654//nucleoplasm;GO:0005737//cytoplasm;GO:0005829//cytosol;GO:0043231//intracellular membrane-bounded organelle	GO:0000166//nucleotide binding;GO:0004672//protein kinase activity;GO:0004674//protein serine/threonine kinase activity;GO:0004704//NF-kappaB-inducing kinase activity;GO:0004709//MAP kinase kinase kinase activity;GO:0005515//protein binding;GO:0005524//ATP binding;GO:0016301//kinase activity;GO:0016740//transferase activity	GO:0000165//MAPK cascade;GO:0000186//activation of MAPKK activity;GO:0006468//protein phosphorylation;GO:0006955//immune response;GO:0007249//I-kappaB kinase/NF-kappaB signaling;GO:0016310//phosphorylation;GO:0033209//tumor necrosis factor-mediated signaling pathway;GO:0038061//NIK/NF-kappaB signaling;GO:0043123//positive regulation of I-kappaB kinase/NF-kappaB signaling;GO:0051607//defense respo…
ENSG00000006071	0	0	0	0	0	0	0	0	0	0	0	0	0	0	0	0	ABCC8	ATP binding cassette subfamily C member 8 [Source:HGNC Symbol;Acc:HGNC:59]	Organismal Systems;Human Diseases;Environmental Information Processing	Endocrine system;Endocrine and metabolic diseases;Membrane transport	ko04911//Insulin secretion;ko04930//Type II diabetes mellitus;ko02010//ABC transporters	K05032;K05032;K05032	GO:0005739//mitochondrion;GO:0005886//plasma membrane;GO:0008282//inward rectifying potassium channel;GO:0016020//membrane;GO:0016021//integral component of membrane;GO:0030672//synaptic vesicle membrane;GO:0031004//potassium ion-transporting ATPase complex;GO:0042383//sarcolemma	GO:0000166//nucleotide binding;GO:0005267//potassium channel activity;GO:0005515//protein binding;GO:0005524//ATP binding;GO:0008281//sulfonylurea receptor activity;GO:0015272//ATP-activated inward rectifier potassium channel activity;GO:0016887//ATPase activity;GO:0019829//cation-transporting ATPase activity;GO:0042626//ATPase activity, coupled to transmembrane movement of substances;GO:0044325/…	GO:0001678//cellular glucose homeostasis;GO:0006813//potassium ion transport;GO:0007565//female pregnancy;GO:0007613//memory;GO:0008542//visual learning;GO:0009268//response to pH;GO:0010043//response to zinc ion;GO:0010989//negative regulation of low-density lipoprotein particle clearance;GO:0016525//negative regulation of angiogenesis;GO:0032496//response to lipopolysaccharide;GO:0032760//posit…
ENSG00000006116	0	0	0	0	0	0	0	0	0	0	0	0	0	0	0	0	CACNG3	calcium voltage-gated channel auxiliary subunit gamma 3 [Source:HGNC Symbol;Acc:HGNC:1407]	Environmental Information Processing;Human Diseases;Organismal Systems;Organismal Systems;Human Diseases;Organismal Systems;Human Diseases	Signal transduction;Cardiovascular diseases;Endocrine system;Circulatory system;Cardiovascular diseases;Circulatory system;Cardiovascular diseases	ko04010//MAPK signaling pathway;ko05414//Dilated cardiomyopathy (DCM);ko04921//Oxytocin signaling pathway;ko04261//Adrenergic signaling in cardiomyocytes;ko05410//Hypertrophic cardiomyopathy (HCM);ko04260//Cardiac muscle contraction;ko05412//Arrhythmogenic right ventricular cardiomyopathy (ARVC)	K04868;K04868;K04868;K04868;K04868;K04868;K04868	GO:0005886//plasma membrane;GO:0005891//voltage-gated calcium channel complex;GO:0016020//membrane;GO:0016021//integral component of membrane;GO:0030425//dendrite;GO:0030666//endocytic vesicle membrane;GO:0032281//AMPA glutamate receptor complex;GO:0036477//somatodendritic compartment;GO:0060076//excitatory synapse;GO:0098685//Schaffer collateral - CA1 synapse;GO:0098839//postsynaptic density mem…	GO:0005244//voltage-gated ion channel activity;GO:0005245//voltage-gated calcium channel activity;GO:0005262//calcium channel activity;GO:0016247//channel regulator activity;GO:0030165//PDZ domain binding;GO:0035255//ionotropic glutamate receptor binding	GO:0006605//protein targeting;GO:0006811//ion transport;GO:0006816//calcium ion transport;GO:0008104//protein localization;GO:0019226//transmission of nerve impulse;GO:0034765//regulation of ion transmembrane transport;GO:0051968//positive regulation of synaptic transmission, glutamatergic;GO:0061337//cardiac conduction;GO:0070588//calcium ion transmembrane transport;GO:0098943//neurotransmitter …
ENSG00000006118	7.53	10.68	12.05	13.6	13.56	11.62	12.32	13.3	351	792	801	878	1057	944	882	1044	TMEM132A	transmembrane protein 132A [Source:HGNC Symbol;Acc:HGNC:31092]	-	-	-	-	GO:0000139//Golgi membrane;GO:0005783//endoplasmic reticulum;GO:0005788//endoplasmic reticulum lumen;GO:0005789//endoplasmic reticulum membrane;GO:0005794//Golgi apparatus;GO:0016020//membrane;GO:0016021//integral component of membrane;GO:0070062//extracellular exosome	GO:0003674//molecular_function	GO:0008150//biological_process;GO:0043687//post-translational protein modification;GO:0044267//cellular protein metabolic process
ENSG00000006125	37.84	35.11	37.06	35.92	39.55	35.25	36.01	38.66	3649	4112	3985	3700	4539	4724	4329	4572	AP2B1	adaptor related protein complex 2 subunit beta 1 [Source:HGNC Symbol;Acc:HGNC:563]	Human Diseases;Cellular Processes;Organismal Systems;Organismal Systems	Neurodegenerative diseases;Transport and catabolism;Nervous system;Excretory system	ko05016//Huntington disease;ko04144//Endocytosis;ko04721//Synaptic vesicle cycle;ko04961//Endocrine and other factor-regulated calcium reabsorption	K11825;K11825;K11825;K11825	GO:0005829//cytosol;GO:0005886//plasma membrane;GO:0005905//clathrin-coated pit;GO:0016020//membrane;GO:0030117//membrane coat;GO:0030118//clathrin coat;GO:0030122//AP-2 adaptor complex;GO:0030131//clathrin adaptor complex;GO:0030666//endocytic vesicle membrane;GO:0030669//clathrin-coated endocytic vesicle membrane;GO:0036020//endolysosome membrane;GO:0045334//clathrin-coated endocytic vesicle;GO…	GO:0005048//signal sequence binding;GO:0005515//protein binding;GO:0030276//clathrin binding;GO:0035615//clathrin adaptor activity;GO:0044877//protein-containing complex binding	GO:0001822//kidney development;GO:0003279//cardiac septum development;GO:0003281//ventricular septum development;GO:0006886//intracellular protein transport;GO:0006897//endocytosis;GO:0007507//heart development;GO:0015031//protein transport;GO:0016192//vesicle-mediated transport;GO:0019886//antigen processing and presentation of exogenous peptide antigen via MHC class II;GO:0032802//low-density l…
ENSG00000006128	0	0	0	0	0	0	0	0	0	0	0	0	0	0	0	0	TAC1	tachykinin precursor 1 [Source:HGNC Symbol;Acc:HGNC:11517]	Environmental Information Processing	Signaling molecules and interaction	ko04080//Neuroactive ligand-receptor interaction	K05239	GO:0005576//extracellular region;GO:0005615//extracellular space;GO:0005886//plasma membrane;GO:0030424//axon;GO:0043025//neuronal cell body;GO:0045202//synapse	GO:0031835//substance P receptor binding	GO:0002675//positive regulation of acute inflammatory response;GO:0006954//inflammatory response;GO:0007186//G protein-coupled receptor signaling pathway;GO:0007204//positive regulation of cytosolic calcium ion concentration;GO:0007217//tachykinin receptor signaling pathway;GO:0007218//neuropeptide signaling pathway;GO:0007267//cell-cell signaling;GO:0007268//chemical synaptic transmission;GO:000…
ENSG00000006194	15.59	18.27	19.48	18.96	19.5	15.86	18.8	17.86	567.13	825.46	844.14	782.12	871.44	799.42	834.44	876.65	ZNF263	zinc finger protein 263 [Source:HGNC Symbol;Acc:HGNC:13056]	-	-	-	-	GO:0000785//chromatin;GO:0005634//nucleus	GO:0000978//RNA polymerase II proximal promoter sequence-specific DNA binding;GO:0000981//DNA-binding transcription factor activity, RNA polymerase II-specific;GO:0001227//DNA-binding transcription repressor activity, RNA polymerase II-specific;GO:0003676//nucleic acid binding;GO:0003677//DNA binding;GO:0003700//DNA-binding transcription factor activity;GO:0005515//protein binding;GO:0043565//seq…	GO:0000122//negative regulation of transcription by RNA polymerase II;GO:0006355//regulation of transcription, DNA-templated;GO:0006357//regulation of transcription by RNA polymerase II;GO:0045944//positive regulation of transcription by RNA polymerase II
ENSG00000006210	27.74	36.94	36.86	38.15	34.45	36.02	32.5	30.26	1763	2888	2831	2622	2808	3110	2687	2566	CX3CL1	C-X3-C motif chemokine ligand 1 [Source:HGNC Symbol;Acc:HGNC:10647]	Environmental Information Processing;Human Diseases;Organismal Systems;Environmental Information Processing;Environmental Information Processing	Signaling molecules and interaction;Infectious diseases;Immune system;Signal transduction;Signaling molecules and interaction	ko04060//Cytokine-cytokine receptor interaction;ko05163//Human cytomegalovirus infection;ko04062//Chemokine signaling pathway;ko04668//TNF signaling pathway;ko04061//Viral protein interaction with cytokine and cytokine receptor	K05508;K05508;K05508;K05508;K05508	GO:0005576//extracellular region;GO:0005615//extracellular space;GO:0005886//plasma membrane;GO:0009986//cell surface;GO:0016020//membrane;GO:0016021//integral component of membrane;GO:0042995//cell projection;GO:0043005//neuron projection;GO:0043025//neuronal cell body;GO:0044297//cell body;GO:0048471//perinuclear region of cytoplasm	GO:0005102//signaling receptor binding;GO:0005125//cytokine activity;GO:0005178//integrin binding;GO:0005515//protein binding;GO:0008009//chemokine activity;GO:0031737//CX3C chemokine receptor binding;GO:0042056//chemoattractant activity;GO:0045237//CXCR1 chemokine receptor binding;GO:0048020//CCR chemokine receptor binding	GO:0001774//microglial cell activation;GO:0001954//positive regulation of cell-matrix adhesion;GO:0002052//positive regulation of neuroblast proliferation;GO:0002523//leukocyte migration involved in inflammatory response;GO:0002548//monocyte chemotaxis;GO:0002931//response to ischemia;GO:0006935//chemotaxis;GO:0006952//defense response;GO:0006954//inflammatory response;GO:0006955//immune response…
ENSG00000006282	31.29	35.18	30.64	33	32.69	40.74	33.72	31.96	1204	2001.36	1876.76	1843.46	2121	2147	1907.54	2128	SPATA20	spermatogenesis associated 20 [Source:HGNC Symbol;Acc:HGNC:26125]	-	-	-	-	GO:0005576//extracellular region	GO:0003824//catalytic activity	GO:0005975//carbohydrate metabolic process;GO:0007275//multicellular organism development;GO:0007283//spermatogenesis;GO:0030154//cell differentiation
ENSG00000006283	0	0	0.02	0	0	0	0	0.01	0	0	3	0	0	0	0	1	CACNA1G	calcium voltage-gated channel subunit alpha1 G [Source:HGNC Symbol;Acc:HGNC:1394]	Environmental Information Processing;Environmental Information Processing;Human Diseases;Organismal Systems;Organismal Systems;Organismal Systems;Organismal Systems;Human Diseases	Signal transduction;Signal transduction;Endocrine and metabolic diseases;Environmental adaptation;Endocrine system;Endocrine system;Endocrine system;Endocrine and metabolic diseases	ko04010//MAPK signaling pathway;ko04020//Calcium signaling pathway;ko04934//Cushing syndrome;ko04713//Circadian entrainment;ko04925//Aldosterone synthesis and secretion;ko04929//GnRH secretion;ko04927//Cortisol synthesis and secretion;ko04930//Type II diabetes mellitus	K04854;K04854;K04854;K04854;K04854;K04854;K04854;K04854	GO:0001518//voltage-gated sodium channel complex;GO:0005737//cytoplasm;GO:0005886//plasma membrane;GO:0005891//voltage-gated calcium channel complex;GO:0016020//membrane;GO:0016021//integral component of membrane;GO:0043005//neuron projection;GO:0045202//synapse	GO:0005216//ion channel activity;GO:0005244//voltage-gated ion channel activity;GO:0005245//voltage-gated calcium channel activity;GO:0005248//voltage-gated sodium channel activity;GO:0005261//cation channel activity;GO:0005262//calcium channel activity;GO:0008332//low voltage-gated calcium channel activity;GO:0086056//voltage-gated calcium channel activity involved in AV node cell action potenti…	GO:0001508//action potential;GO:0002027//regulation of heart rate;GO:0006811//ion transport;GO:0006816//calcium ion transport;GO:0007268//chemical synaptic transmission;GO:0010045//response to nickel cation;GO:0019228//neuronal action potential;GO:0034220//ion transmembrane transport;GO:0034765//regulation of ion transmembrane transport;GO:0035725//sodium ion transmembrane transport;GO:0042391//r…
ENSG00000006327	12.15	15.55	15.88	15.43	14.89	15.28	13.96	10.99	225	359	352	316	360	388	329	267	TNFRSF12A	TNF receptor superfamily member 12A [Source:HGNC Symbol;Acc:HGNC:18152]	Environmental Information Processing	Signaling molecules and interaction	ko04060//Cytokine-cytokine receptor interaction	K05149	GO:0005886//plasma membrane;GO:0016020//membrane;GO:0016021//integral component of membrane	GO:0005515//protein binding	GO:0001525//angiogenesis;GO:0006915//apoptotic process;GO:0007155//cell adhesion;GO:0007275//multicellular organism development;GO:0030154//cell differentiation;GO:0033209//tumor necrosis factor-mediated signaling pathway;GO:0043065//positive regulation of apoptotic process;GO:0061041//regulation of wound healing;GO:2001238//positive regulation of extrinsic apoptotic signaling pathway
ENSG00000006377	3.56	5.06	4.49	4.37	3.7	6.04	3.34	2.98	160	202	168	160	176	253	193	177	DLX6	distal-less homeobox 6 [Source:HGNC Symbol;Acc:HGNC:2919]	-	-	-	-	GO:0000785//chromatin;GO:0005634//nucleus	GO:0000978//RNA polymerase II proximal promoter sequence-specific DNA binding;GO:0000981//DNA-binding transcription factor activity, RNA polymerase II-specific;GO:0003677//DNA binding;GO:0003700//DNA-binding transcription factor activity;GO:1990837//sequence-specific double-stranded DNA binding	GO:0001501//skeletal system development;GO:0006355//regulation of transcription, DNA-templated;GO:0006357//regulation of transcription by RNA polymerase II;GO:0007275//multicellular organism development;GO:0007399//nervous system development;GO:0030154//cell differentiation;GO:0030326//embryonic limb morphogenesis;GO:0030855//epithelial cell differentiation;GO:0042472//inner ear morphogenesis;GO:…
ENSG00000006432	2.46	3.4	3.32	3.31	2.94	3.35	2.96	2.81	376	540	523	477	504	534	487	500	MAP3K9	mitogen-activated protein kinase kinase kinase 9 [Source:HGNC Symbol;Acc:HGNC:6861]	Organismal Systems;Environmental Information Processing	Development and regeneration;Signal transduction	ko04361//Axon regeneration;ko04013//MAPK signaling pathway - fly	K04417;K04417	GO:0005575//cellular_component	GO:0000166//nucleotide binding;GO:0004672//protein kinase activity;GO:0004674//protein serine/threonine kinase activity;GO:0004706//JUN kinase kinase kinase activity;GO:0004708//MAP kinase kinase activity;GO:0004709//MAP kinase kinase kinase activity;GO:0004713//protein tyrosine kinase activity;GO:0005515//protein binding;GO:0005524//ATP binding;GO:0016301//kinase activity;GO:0016740//transferase…	GO:0000165//MAPK cascade;GO:0000186//activation of MAPKK activity;GO:0006468//protein phosphorylation;GO:0006915//apoptotic process;GO:0007256//activation of JNKK activity;GO:0007257//activation of JUN kinase activity;GO:0008219//cell death;GO:0016310//phosphorylation;GO:0018108//peptidyl-tyrosine phosphorylation;GO:0043065//positive regulation of apoptotic process;GO:0046777//protein autophospho…
ENSG00000006451	16.38	13.89	15.82	14.27	11.77	12.2	12.83	14.27	891	923	998	844	816	819	862	1022	RALA	RAS like proto-oncogene A [Source:HGNC Symbol;Acc:HGNC:9839]	Human Diseases;Environmental Information Processing;Environmental Information Processing;Environmental Information Processing;Human Diseases;Human Diseases;Human Diseases	Cancers;Signal transduction;Signal transduction;Signal transduction;Infectious diseases;Cancers;Cancers	ko05200//Pathways in cancer;ko04014//Ras signaling pathway;ko04072//Phospholipase D signaling pathway;ko04015//Rap1 signaling pathway;ko05132//Salmonella infection;ko05210//Colorectal cancer;ko05212//Pancreatic cancer	K07834;K07834;K07834;K07834;K07834;K07834;K07834	GO:0005886//plasma membrane;GO:0005925//focal adhesion;GO:0009986//cell surface;GO:0016020//membrane;GO:0030139//endocytic vesicle;GO:0030659//cytoplasmic vesicle membrane;GO:0032154//cleavage furrow;GO:0070062//extracellular exosome;GO:0090543//Flemming body	GO:0000166//nucleotide binding;GO:0003924//GTPase activity;GO:0005515//protein binding;GO:0005525//GTP binding;GO:0016787//hydrolase activity;GO:0017022//myosin binding;GO:0019003//GDP binding;GO:0031625//ubiquitin protein ligase binding;GO:0031755//Edg-2 lysophosphatidic acid receptor binding;GO:0051117//ATPase binding	GO:0001843//neural tube closure;GO:0006887//exocytosis;GO:0006935//chemotaxis;GO:0007049//cell cycle;GO:0007165//signal transduction;GO:0007265//Ras protein signal transduction;GO:0017157//regulation of exocytosis;GO:0031532//actin cytoskeleton reorganization;GO:0035722//interleukin-12-mediated signaling pathway;GO:0051301//cell division;GO:0051491//positive regulation of filopodium assembly;GO:0…
ENSG00000006453	10.1	9.88	9.79	9.63	9.54	10.03	10.34	9.08	718.27	861.92	833	754.22	869	975.26	946.8	852.96	BAIAP2L1	BAR/IMD domain containing adaptor protein 2 like 1 [Source:HGNC Symbol;Acc:HGNC:21649]	Human Diseases	Infectious diseases	ko05130//Pathogenic Escherichia coli infection	K20127	GO:0005654//nucleoplasm;GO:0005737//cytoplasm;GO:0005829//cytosol;GO:0005856//cytoskeleton;GO:0005886//plasma membrane;GO:0005912//adherens junction;GO:0015629//actin cytoskeleton;GO:0070062//extracellular exosome	GO:0003779//actin binding;GO:0005515//protein binding;GO:0070064//proline-rich region binding;GO:0098641//cadherin binding involved in cell-cell adhesion	GO:0007009//plasma membrane organization;GO:0009617//response to bacterium;GO:0030833//regulation of actin filament polymerization;GO:0030838//positive regulation of actin filament polymerization;GO:0046626//regulation of insulin receptor signaling pathway;GO:0051017//actin filament bundle assembly;GO:0051764//actin crosslink formation;GO:0098609//cell-cell adhesion;GO:2000251//positive regulatio…
ENSG00000006459	9.47	7.79	7.93	7.94	7.76	7.39	8.24	8.85	1684	1715	1703	1574	1785	1815	1902	2101	KDM7A	lysine demethylase 7A [Source:HGNC Symbol;Acc:HGNC:22224]	-	-	-	-	GO:0000785//chromatin;GO:0005634//nucleus;GO:0005654//nucleoplasm;GO:0005730//nucleolus	GO:0003712//transcription coregulator activity;GO:0005506//iron ion binding;GO:0008270//zinc ion binding;GO:0016491//oxidoreductase activity;GO:0016706//oxidoreductase activity, acting on paired donors, with incorporation or reduction of molecular oxygen, 2-oxoglutarate as one donor, and incorporation of one atom each of oxygen into both donors;GO:0032452//histone demethylase activity;GO:0032454/…	GO:0006325//chromatin organization;GO:0006357//regulation of transcription by RNA polymerase II;GO:0006482//protein demethylation;GO:0007399//nervous system development;GO:0030901//midbrain development;GO:0033169//histone H3-K9 demethylation;GO:0035574//histone H4-K20 demethylation;GO:0045893//positive regulation of transcription, DNA-templated;GO:0055114//oxidation-reduction process;GO:0070544//…
ENSG00000006468	0.02	0.1	0.01	0.13	0.17	0.08	0.29	0.1	1	2	1	3	5	8	8	5	ETV1	ETS variant transcription factor 1 [Source:HGNC Symbol;Acc:HGNC:3490]	Human Diseases	Cancers	ko05202//Transcriptional misregulation in cancers	K09431	GO:0000785//chromatin;GO:0005634//nucleus	GO:0000978//RNA polymerase II proximal promoter sequence-specific DNA binding;GO:0000981//DNA-binding transcription factor activity, RNA polymerase II-specific;GO:0001228//DNA-binding transcription activator activity, RNA polymerase II-specific;GO:0003677//DNA binding;GO:0003700//DNA-binding transcription factor activity;GO:0005515//protein binding;GO:0043565//sequence-specific DNA binding;GO:199…	GO:0006355//regulation of transcription, DNA-templated;GO:0006357//regulation of transcription by RNA polymerase II;GO:0006366//transcription by RNA polymerase II;GO:0007411//axon guidance;GO:0007517//muscle organ development;GO:0007638//mechanosensory behavior;GO:0030154//cell differentiation;GO:0045893//positive regulation of transcription, DNA-templated;GO:0045944//positive regulation of trans…
ENSG00000006530	14.57	13.35	14.5	14.2	14.53	13.45	13.06	14.06	726	796	831	764	888	875	811	902	AGK	acylglycerol kinase [Source:HGNC Symbol;Acc:HGNC:21869]	Metabolism;Metabolism	Global and overview maps;Lipid metabolism	ko01100//Metabolic pathways;ko00561//Glycerolipid metabolism	K09881;K09881	GO:0005737//cytoplasm;GO:0005739//mitochondrion;GO:0005741//mitochondrial outer membrane;GO:0005743//mitochondrial inner membrane;GO:0005758//mitochondrial intermembrane space;GO:0005829//cytosol;GO:0016020//membrane;GO:0031305//integral component of mitochondrial inner membrane;GO:0031966//mitochondrial membrane;GO:0042721//TIM22 mitochondrial import inner membrane insertion complex;GO:0043231//…	GO:0000166//nucleotide binding;GO:0001727//lipid kinase activity;GO:0001729//ceramide kinase activity;GO:0003951//NAD+ kinase activity;GO:0004143//diacylglycerol kinase activity;GO:0005515//protein binding;GO:0005524//ATP binding;GO:0016301//kinase activity;GO:0016740//transferase activity;GO:0017050//D-erythro-sphingosine kinase activity;GO:0047620//acylglycerol kinase activity;GO:0102773//dihyd…	GO:0006665//sphingolipid metabolic process;GO:0016310//phosphorylation;GO:0045039//protein import into mitochondrial inner membrane;GO:0046474//glycerophospholipid biosynthetic process;GO:0046486//glycerolipid metabolic process;GO:0046512//sphingosine biosynthetic process;GO:0046513//ceramide biosynthetic process;GO:0046834//lipid phosphorylation
ENSG00000006534	3.18	3.73	3.54	3.33	4.17	3.69	3.78	3.81	145	225	209	183	275	265	224	244	ALDH3B1	aldehyde dehydrogenase 3 family member B1 [Source:HGNC Symbol;Acc:HGNC:410]	Metabolism;Human Diseases;Metabolism;Metabolism;Metabolism;Metabolism;Metabolism;Metabolism;Metabolism	Global and overview maps;Cancers;Xenobiotics biodegradation and metabolism;Carbohydrate metabolism;Xenobiotics biodegradation and metabolism;Amino acid metabolism;Metabolism of other amino acids;Amino acid metabolism;Amino acid metabolism	ko01100//Metabolic pathways;ko05204//Chemical carcinogenesis;ko00980//Metabolism of xenobiotics by cytochrome P450;ko00010//Glycolysis / Gluconeogenesis;ko00982//Drug metabolism - cytochrome P450;ko00350//Tyrosine metabolism;ko00410//beta-Alanine metabolism;ko00340//Histidine metabolism;ko00360//Phenylalanine metabolism	K00129;K00129;K00129;K00129;K00129;K00129;K00129;K00129;K00129	GO:0005737//cytoplasm;GO:0005829//cytosol;GO:0005886//plasma membrane;GO:0016020//membrane;GO:0030667//secretory granule membrane;GO:0031982//vesicle;GO:0035579//specific granule membrane;GO:0070062//extracellular exosome	GO:0004028//3-chloroallyl aldehyde dehydrogenase activity;GO:0004029//aldehyde dehydrogenase (NAD) activity;GO:0004030//aldehyde dehydrogenase [NAD(P)+] activity;GO:0005515//protein binding;GO:0016491//oxidoreductase activity;GO:0016620//oxidoreductase activity, acting on the aldehyde or oxo group of donors, NAD or NADP as acceptor;GO:0018477//benzaldehyde dehydrogenase (NADP+) activity;GO:001847…	GO:0006066//alcohol metabolic process;GO:0006068//ethanol catabolic process;GO:0006081//cellular aldehyde metabolic process;GO:0006629//lipid metabolic process;GO:0030148//sphingolipid biosynthetic process;GO:0034599//cellular response to oxidative stress;GO:0043312//neutrophil degranulation;GO:0046185//aldehyde catabolic process;GO:0055114//oxidation-reduction process
ENSG00000006555	0	0.09	0.09	0.04	0.07	0.04	0.02	0.01	0	4	4	3	3	3	2	1	TTC22	tetratricopeptide repeat domain 22 [Source:HGNC Symbol;Acc:HGNC:26067]	-	-	-	-	-	GO:0005515//protein binding	-
ENSG00000006576	6.5	5.7	5.13	5.79	4.32	4.28	4.63	5.34	592	596	548	532	399	448	475	544	PHTF2	putative homeodomain transcription factor 2 [Source:HGNC Symbol;Acc:HGNC:13411]	-	-	-	-	GO:0005783//endoplasmic reticulum;GO:0016020//membrane;GO:0016021//integral component of membrane	-	-
ENSG00000006606	0	0	0	0	0	0	0	0	0	0	0	0	0	0	0	0	CCL26	C-C motif chemokine ligand 26 [Source:HGNC Symbol;Acc:HGNC:10625]	Environmental Information Processing;Organismal Systems;Environmental Information Processing	Signaling molecules and interaction;Immune system;Signaling molecules and interaction	ko04060//Cytokine-cytokine receptor interaction;ko04062//Chemokine signaling pathway;ko04061//Viral protein interaction with cytokine and cytokine receptor	K21096;K21096;K21096	GO:0005576//extracellular region;GO:0005615//extracellular space	GO:0005125//cytokine activity;GO:0005515//protein binding;GO:0008009//chemokine activity;GO:0031728//CCR3 chemokine receptor binding;GO:0048018//receptor ligand activity;GO:0048020//CCR chemokine receptor binding	GO:0001938//positive regulation of endothelial cell proliferation;GO:0002548//monocyte chemotaxis;GO:0006935//chemotaxis;GO:0006954//inflammatory response;GO:0006955//immune response;GO:0007165//signal transduction;GO:0007186//G protein-coupled receptor signaling pathway;GO:0007267//cell-cell signaling;GO:0010818//T cell chemotaxis;GO:0030335//positive regulation of cell migration;GO:0030593//neu…
ENSG00000006607	14.36	13.82	14.39	14.16	13.14	12.97	13.22	12.7	1178.21	1386.42	1467.53	1285.05	1416.32	1477.84	1423.63	1387.97	FARP2	FERM, ARH/RhoGEF and pleckstrin domain protein 2 [Source:HGNC Symbol;Acc:HGNC:16460]	Environmental Information Processing;Cellular Processes	Signal transduction;Cellular community - eukaryotes	ko04015//Rap1 signaling pathway;ko04520//Adherens junction	K06082;K06082	GO:0005737//cytoplasm;GO:0005829//cytosol;GO:0005856//cytoskeleton	GO:0005085//guanyl-nucleotide exchange factor activity;GO:0008092//cytoskeletal protein binding	GO:0007155//cell adhesion;GO:0016322//neuron remodeling;GO:0016601//Rac protein signal transduction;GO:0022405//hair cycle process;GO:0030316//osteoclast differentiation;GO:0031532//actin cytoskeleton reorganization;GO:0033623//regulation of integrin activation;GO:0050790//regulation of catalytic activity;GO:0071526//semaphorin-plexin signaling pathway;GO:0071800//podosome assembly
ENSG00000006611	0	0	0	0	0.05	0.12	0.07	0.05	0	0	0	0	3	6	4	3	USH1C	USH1 protein network component harmonin [Source:HGNC Symbol;Acc:HGNC:12597]	-	-	-	-	GO:0001750//photoreceptor outer segment;GO:0001917//photoreceptor inner segment;GO:0002142//stereocilia ankle link complex;GO:0005737//cytoplasm;GO:0005829//cytosol;GO:0005856//cytoskeleton;GO:0005886//plasma membrane;GO:0005902//microvillus;GO:0005903//brush border;GO:0032391//photoreceptor connecting cilium;GO:0032420//stereocilium;GO:0032426//stereocilium tip;GO:0042995//cell projection;GO:004…	GO:0005515//protein binding;GO:0030507//spectrin binding;GO:0051015//actin filament binding	GO:0000086//G2/M transition of mitotic cell cycle;GO:0007605//sensory perception of sound;GO:0030046//parallel actin filament bundle assembly;GO:0030154//cell differentiation;GO:0032532//regulation of microvillus length;GO:0034622//cellular protein-containing complex assembly;GO:0042472//inner ear morphogenesis;GO:0042491//inner ear auditory receptor cell differentiation;GO:0045494//photoreceptor…
ENSG00000006625	35.92	39.38	38.3	36.02	28.92	31.81	36.81	34.76	774	1047	987	861	800	933	1013.01	994	GGCT	gamma-glutamylcyclotransferase [Source:HGNC Symbol;Acc:HGNC:21705]	Metabolism;Metabolism	Global and overview maps;Metabolism of other amino acids	ko01100//Metabolic pathways;ko00480//Glutathione metabolism	K00682;K00682	GO:0005829//cytosol;GO:0070062//extracellular exosome	GO:0003839//gamma-glutamylcyclotransferase activity;GO:0016829//lyase activity;GO:0042803//protein homodimerization activity	GO:0001836//release of cytochrome c from mitochondria;GO:0006750//glutathione biosynthetic process
ENSG00000006634	21.19	16.89	17.29	15.02	10.83	11.62	12.6	12.75	1041	1012	1012	811	680	781	799	821	DBF4	DBF4 zinc finger [Source:HGNC Symbol;Acc:HGNC:17364]	Cellular Processes	Cell growth and death	ko04110//Cell cycle	K06629	GO:0005634//nucleus;GO:0005654//nucleoplasm;GO:0016604//nuclear body;GO:0031431//Dbf4-dependent protein kinase complex	GO:0003676//nucleic acid binding;GO:0005515//protein binding;GO:0008047//enzyme activator activity;GO:0008270//zinc ion binding;GO:0043539//protein serine/threonine kinase activator activity;GO:0046872//metal ion binding	GO:0000082//G1/S transition of mitotic cell cycle;GO:0006260//DNA replication;GO:0007049//cell cycle;GO:0010571//positive regulation of nuclear cell cycle DNA replication;GO:0050790//regulation of catalytic activity;GO:0071902//positive regulation of protein serine/threonine kinase activity;GO:1901987//regulation of cell cycle phase transition
ENSG00000006638	0	0	0	0	0.03	0.02	0.02	0.03	0	0	0	0	2	1	1	1	TBXA2R	thromboxane A2 receptor [Source:HGNC Symbol;Acc:HGNC:11608]	Environmental Information Processing;Environmental Information Processing;Organismal Systems	Signaling molecules and interaction;Signal transduction;Immune system	ko04080//Neuroactive ligand-receptor interaction;ko04020//Calcium signaling pathway;ko04611//Platelet activation	K04264;K04264;K04264	GO:0001669//acrosomal vesicle;GO:0005886//plasma membrane;GO:0005887//integral component of plasma membrane;GO:0016020//membrane;GO:0016021//integral component of membrane;GO:0016607//nuclear speck	GO:0004930//G protein-coupled receptor activity;GO:0004960//thromboxane receptor activity;GO:0004961//thromboxane A2 receptor activity;GO:0005085//guanyl-nucleotide exchange factor activity;GO:0005515//protein binding	GO:0006954//inflammatory response;GO:0007165//signal transduction;GO:0007186//G protein-coupled receptor signaling pathway;GO:0007189//adenylate cyclase-activating G protein-coupled receptor signaling pathway;GO:0007204//positive regulation of cytosolic calcium ion concentration;GO:0007584//response to nutrient;GO:0019229//regulation of vasoconstriction;GO:0019932//second-messenger-mediated signa…
ENSG00000006652	26.53	25.33	24.79	23.79	22.9	21.63	22.97	22.3	1177.32	1405.91	1339.54	1170.29	1270.47	1211.28	1287.06	1327.93	IFRD1	interferon related developmental regulator 1 [Source:HGNC Symbol;Acc:HGNC:5456]	-	-	-	-	GO:0005634//nucleus	-	GO:0006357//regulation of transcription by RNA polymerase II;GO:0007275//multicellular organism development;GO:0007518//myoblast fate determination;GO:0030154//cell differentiation
ENSG00000006659	0	0	0	0	0	0	0	0	0	0	0	0	0	0	0	0	LGALS14	galectin 14 [Source:HGNC Symbol;Acc:HGNC:30054]	-	-	-	-	GO:0005634//nucleus;GO:0005654//nucleoplasm	GO:0005515//protein binding;GO:0030246//carbohydrate binding	GO:0006915//apoptotic process;GO:0070234//positive regulation of T cell apoptotic process
ENSG00000006695	12.2	9.16	10.2	9.33	8.57	11.55	9.68	9.1	512	544.99	548	502	593	712	565.98	646	COX10	cytochrome c oxidase assembly factor heme A:farnesyltransferase COX10 [Source:HGNC Symbol;Acc:HGNC:2260]	Metabolism;Organismal Systems;Metabolism;Metabolism	Global and overview maps;Environmental adaptation;Energy metabolism;Metabolism of cofactors and vitamins	ko01100//Metabolic pathways;ko04714//Thermogenesis;ko00190//Oxidative phosphorylation;ko00860//Porphyrin and chlorophyll metabolism	K02257;K02257;K02257;K02257	GO:0005730//nucleolus;GO:0005739//mitochondrion;GO:0005743//mitochondrial inner membrane;GO:0005829//cytosol;GO:0016020//membrane;GO:0016021//integral component of membrane;GO:0031966//mitochondrial membrane;GO:0070069//cytochrome complex	GO:0004129//cytochrome-c oxidase activity;GO:0004311//farnesyltranstransferase activity;GO:0008495//protoheme IX farnesyltransferase activity;GO:0016740//transferase activity;GO:0016765//transferase activity, transferring alkyl or aryl (other than methyl) groups	GO:0000266//mitochondrial fission;GO:0006123//mitochondrial electron transport, cytochrome c to oxygen;GO:0006783//heme biosynthetic process;GO:0006784//heme a biosynthetic process;GO:0007005//mitochondrion organization;GO:0008535//respiratory chain complex IV assembly;GO:0009060//aerobic respiration;GO:0017004//cytochrome complex assembly;GO:0045333//cellular respiration;GO:0048034//heme O biosy…
ENSG00000006704	10.19	11.11	10.95	11.17	10.35	12.9	10.14	10.18	579	862	861	809	890	994	860	851	GTF2IRD1	GTF2I repeat domain containing 1 [Source:HGNC Symbol;Acc:HGNC:4661]	Environmental Information Processing;Genetic Information Processing	Signal transduction;Transcription	ko04022//cGMP - PKG signaling pathway;ko03022//Basal transcription factors	K03121;K03121	GO:0005634//nucleus;GO:0005654//nucleoplasm;GO:0005829//cytosol	GO:0000978//RNA polymerase II proximal promoter sequence-specific DNA binding;GO:0000981//DNA-binding transcription factor activity, RNA polymerase II-specific;GO:0001227//DNA-binding transcription repressor activity, RNA polymerase II-specific;GO:0003677//DNA binding;GO:0003700//DNA-binding transcription factor activity;GO:0005515//protein binding	GO:0000122//negative regulation of transcription by RNA polymerase II;GO:0006355//regulation of transcription, DNA-templated;GO:0006366//transcription by RNA polymerase II;GO:0007275//multicellular organism development;GO:0014886//transition between slow and fast fiber
ENSG00000006712	25.29	25.3	23.74	23.77	24.54	27.85	26.7	22.19	1073	1321	1214	1118	1343	1626	1458	1251	PAF1	PAF1 homolog, Paf1/RNA polymerase II complex component [Source:HGNC Symbol;Acc:HGNC:25459]	-	-	-	-	GO:0005634//nucleus;GO:0005654//nucleoplasm;GO:0005737//cytoplasm;GO:0016020//membrane;GO:0016593//Cdc73/Paf1 complex;GO:0030054//cell junction;GO:0035327//transcriptionally active chromatin	GO:0000993//RNA polymerase II complex binding;GO:0003682//chromatin binding;GO:0005515//protein binding	GO:0000122//negative regulation of transcription by RNA polymerase II;GO:0001711//endodermal cell fate commitment;GO:0006366//transcription by RNA polymerase II;GO:0006368//transcription elongation from RNA polymerase II promoter;GO:0006378//mRNA polyadenylation;GO:0010390//histone monoubiquitination;GO:0016055//Wnt signaling pathway;GO:0016567//protein ubiquitination;GO:0016570//histone modifica…
ENSG00000006715	13.62	12.58	16.26	17.97	14.67	14.89	13.92	13.67	770	829	862	849	917	804	826	908	VPS41	VPS41 subunit of HOPS complex [Source:HGNC Symbol;Acc:HGNC:12713]	Human Diseases	Infectious diseases	ko05132//Salmonella infection	K20184	GO:0005764//lysosome;GO:0005765//lysosomal membrane;GO:0005768//endosome;GO:0005769//early endosome;GO:0005770//late endosome;GO:0005794//Golgi apparatus;GO:0005798//Golgi-associated vesicle;GO:0005829//cytosol;GO:0010008//endosome membrane;GO:0015630//microtubule cytoskeleton;GO:0016020//membrane;GO:0030123//AP-3 adaptor complex;GO:0030136//clathrin-coated vesicle;GO:0030897//HOPS complex;GO:003…	GO:0003674//molecular_function;GO:0005515//protein binding;GO:0008017//microtubule binding;GO:0031267//small GTPase binding;GO:0042802//identical protein binding;GO:0043621//protein self-association;GO:0046872//metal ion binding	GO:0006623//protein targeting to vacuole;GO:0006886//intracellular protein transport;GO:0006914//autophagy;GO:0008333//endosome to lysosome transport;GO:0009267//cellular response to starvation;GO:0015031//protein transport;GO:0016192//vesicle-mediated transport;GO:0016236//macroautophagy;GO:0034058//endosomal vesicle fusion;GO:0045055//regulated exocytosis;GO:0046907//intracellular transport;GO:…
ENSG00000006740	3.07	2.92	2.97	3.16	2.76	3.01	2.63	2.9	210	294	292	258	291	321	275	315	ARHGAP44	Rho GTPase activating protein 44 [Source:HGNC Symbol;Acc:HGNC:29096]	-	-	-	-	GO:0005737//cytoplasm;GO:0005768//endosome;GO:0005829//cytosol;GO:0014069//postsynaptic density;GO:0030054//cell junction;GO:0030425//dendrite;GO:0031256//leading edge membrane;GO:0042995//cell projection;GO:0043197//dendritic spine;GO:0045202//synapse;GO:0048786//presynaptic active zone;GO:0055037//recycling endosome;GO:0098793//presynapse;GO:0098978//glutamatergic synapse	GO:0005096//GTPase activator activity;GO:0005515//protein binding;GO:0005543//phospholipid binding;GO:0031267//small GTPase binding	GO:0006887//exocytosis;GO:0007165//signal transduction;GO:0032956//regulation of actin cytoskeleton organization;GO:0035020//regulation of Rac protein signal transduction;GO:0035021//negative regulation of Rac protein signal transduction;GO:0043087//regulation of GTPase activity;GO:0043547//positive regulation of GTPase activity;GO:0051056//regulation of small GTPase mediated signal transduction;…
ENSG00000006744	36.03	43.86	39.49	41.87	39.35	31.95	35.45	34.33	1362	2072	1982	1919	2156	2126	1941	1951	ELAC2	elaC ribonuclease Z 2 [Source:HGNC Symbol;Acc:HGNC:14198]	Genetic Information Processing	Translation	ko03013//RNA transport	K00784	GO:0005634//nucleus;GO:0005654//nucleoplasm;GO:0005739//mitochondrion;GO:0005759//mitochondrial matrix;GO:0042645//mitochondrial nucleoid	GO:0003723//RNA binding;GO:0004518//nuclease activity;GO:0004519//endonuclease activity;GO:0004549//tRNA-specific ribonuclease activity;GO:0016787//hydrolase activity;GO:0042781//3'-tRNA processing endoribonuclease activity;GO:0046872//metal ion binding	GO:0008033//tRNA processing;GO:0042780//tRNA 3'-end processing;GO:0072684//mitochondrial tRNA 3'-trailer cleavage, endonucleolytic;GO:0090646//mitochondrial tRNA processing
ENSG00000006747	0.01	0.02	0.01	0.02	0.02	0.03	0.03	0.03	1	2	2	2	1	2	2	2	SCIN	scinderin [Source:HGNC Symbol;Acc:HGNC:21695]	Cellular Processes;Human Diseases;Organismal Systems	Cell motility;Cancers;Immune system	ko04810//Regulation of actin cytoskeleton;ko05203//Viral carcinogenesis;ko04666//Fc gamma R-mediated phagocytosis	K05768;K05768;K05768	GO:0002102//podosome;GO:0005737//cytoplasm;GO:0005856//cytoskeleton;GO:0005886//plasma membrane;GO:0005938//cell cortex;GO:0015629//actin cytoskeleton;GO:0030054//cell junction;GO:0032991//protein-containing complex;GO:0042995//cell projection;GO:0070062//extracellular exosome	GO:0001786//phosphatidylserine binding;GO:0003779//actin binding;GO:0005509//calcium ion binding;GO:0005545//1-phosphatidylinositol binding;GO:0005546//phosphatidylinositol-4,5-bisphosphate binding;GO:0046872//metal ion binding;GO:0051015//actin filament binding	GO:0007417//central nervous system development;GO:0008154//actin polymerization or depolymerization;GO:0008285//negative regulation of cell proliferation;GO:0017156//calcium ion regulated exocytosis;GO:0030031//cell projection assembly;GO:0032330//regulation of chondrocyte differentiation;GO:0042989//sequestering of actin monomers;GO:0043065//positive regulation of apoptotic process;GO:0045010//a…
ENSG00000006756	1.72	1.73	1.67	1.46	2.24	1.96	2.04	2.24	173	213	193	161	271	254	263	279	ARSD	arylsulfatase D [Source:HGNC Symbol;Acc:HGNC:717]	-	-	-	-	GO:0005764//lysosome;GO:0005788//endoplasmic reticulum lumen;GO:0016020//membrane;GO:0016021//integral component of membrane	GO:0003824//catalytic activity;GO:0004065//arylsulfatase activity;GO:0008484//sulfuric ester hydrolase activity;GO:0016787//hydrolase activity;GO:0046872//metal ion binding	-
ENSG00000006757	9.58	10.57	7.37	8.75	9.61	11.43	9.98	9.21	189	258	193	199	248	319	273	275	PNPLA4	patatin like phospholipase domain containing 4 [Source:HGNC Symbol;Acc:HGNC:24887]	Metabolism	Metabolism of cofactors and vitamins	ko00830//Retinol metabolism	K11157	GO:0005737//cytoplasm;GO:0005739//mitochondrion;GO:0005811//lipid droplet;GO:0005829//cytosol;GO:0016020//membrane	GO:0004806//triglyceride lipase activity;GO:0016787//hydrolase activity;GO:0050253//retinyl-palmitate esterase activity	GO:0006629//lipid metabolic process;GO:0008150//biological_process;GO:0016042//lipid catabolic process;GO:0019433//triglyceride catabolic process;GO:0042572//retinol metabolic process;GO:0055088//lipid homeostasis
ENSG00000006788	0	0	0	0	0	0	0	0	0	0	0	0	0	0	0	0	MYH13	myosin heavy chain 13 [Source:HGNC Symbol;Acc:HGNC:7571]	Human Diseases;Human Diseases;Cellular Processes	Infectious diseases;Infectious diseases;Cellular community - eukaryotes	ko05130//Pathogenic Escherichia coli infection;ko05132//Salmonella infection;ko04530//Tight junction	K10352;K10352;K10352	GO:0005737//cytoplasm;GO:0005859//muscle myosin complex;GO:0016459//myosin complex;GO:0030016//myofibril;GO:0032982//myosin filament;GO:0070062//extracellular exosome	GO:0000146//microfilament motor activity;GO:0000166//nucleotide binding;GO:0003774//motor activity;GO:0003779//actin binding;GO:0005515//protein binding;GO:0005516//calmodulin binding;GO:0005524//ATP binding;GO:0051015//actin filament binding	GO:0006936//muscle contraction;GO:0009267//cellular response to starvation
ENSG00000006831	30.17	32.25	33.64	32.12	32.03	28.34	30.31	31.68	2338	3064	3118	2741	3178	3001	3022	3244	ADIPOR2	adiponectin receptor 2 [Source:HGNC Symbol;Acc:HGNC:24041]	Human Diseases;Environmental Information Processing;Organismal Systems;Organismal Systems	Endocrine and metabolic diseases;Signal transduction;Aging;Endocrine system	ko04932//Non-alcoholic fatty liver disease (NAFLD);ko04152//AMPK signaling pathway;ko04211//Longevity regulating pathway - mammal;ko04920//Adipocytokine signaling pathway	K07297;K07297;K07297;K07297	GO:0005886//plasma membrane;GO:0016020//membrane;GO:0016021//integral component of membrane;GO:0031226//intrinsic component of plasma membrane	GO:0005515//protein binding;GO:0038023//signaling receptor activity;GO:0046872//metal ion binding;GO:0055100//adiponectin binding;GO:0097003//adipokinetic hormone receptor activity	GO:0001934//positive regulation of protein phosphorylation;GO:0006629//lipid metabolic process;GO:0006631//fatty acid metabolic process;GO:0007507//heart development;GO:0007565//female pregnancy;GO:0007584//response to nutrient;GO:0009617//response to bacterium;GO:0009750//response to fructose;GO:0009755//hormone-mediated signaling pathway;GO:0010629//negative regulation of gene expression;GO:001…
ENSG00000006837	1.18	0.58	1.03	0.98	0.5	0.51	0.84	1.17	21	12	24	20	11	13	18	24	CDKL3	cyclin dependent kinase like 3 [Source:HGNC Symbol;Acc:HGNC:15483]	-	-	-	-	GO:0005634//nucleus;GO:0005737//cytoplasm	GO:0000166//nucleotide binding;GO:0004672//protein kinase activity;GO:0004674//protein serine/threonine kinase activity;GO:0004693//cyclin-dependent protein serine/threonine kinase activity;GO:0005515//protein binding;GO:0005524//ATP binding;GO:0016301//kinase activity;GO:0016740//transferase activity	GO:0006464//cellular protein modification process;GO:0006468//protein phosphorylation;GO:0016310//phosphorylation;GO:0030517//negative regulation of axon extension;GO:0050775//positive regulation of dendrite morphogenesis;GO:0051726//regulation of cell cycle;GO:0097484//dendrite extension
ENSG00000007001	0	0.07	0.02	0.1	0.05	0.12	0	0.03	0	4	1	5	3	8	0	2	UPP2	uridine phosphorylase 2 [Source:HGNC Symbol;Acc:HGNC:23061]	Metabolism;Metabolism;Metabolism	Global and overview maps;Xenobiotics biodegradation and metabolism;Nucleotide metabolism	ko01100//Metabolic pathways;ko00983//Drug metabolism - other enzymes;ko00240//Pyrimidine metabolism	K00757;K00757;K00757	GO:0005737//cytoplasm;GO:0005829//cytosol;GO:0045098//type III intermediate filament	GO:0003824//catalytic activity;GO:0004850//uridine phosphorylase activity;GO:0005515//protein binding;GO:0016740//transferase activity;GO:0016757//transferase activity, transferring glycosyl groups;GO:0016763//transferase activity, transferring pentosyl groups;GO:0042802//identical protein binding	GO:0006218//uridine catabolic process;GO:0009116//nucleoside metabolic process;GO:0009166//nucleotide catabolic process;GO:0043097//pyrimidine nucleoside salvage;GO:0044206//UMP salvage;GO:0046108//uridine metabolic process;GO:0046135//pyrimidine nucleoside catabolic process
ENSG00000007038	0	0	0	0	0	0	0	0	0	0	0	0	0	0	0	0	PRSS21	serine protease 21 [Source:HGNC Symbol;Acc:HGNC:9485]	-	-	-	-	GO:0005576//extracellular region;GO:0005615//extracellular space;GO:0005737//cytoplasm;GO:0005886//plasma membrane;GO:0016020//membrane;GO:0031225//anchored component of membrane	GO:0004252//serine-type endopeptidase activity;GO:0005515//protein binding;GO:0008233//peptidase activity;GO:0008236//serine-type peptidase activity;GO:0016787//hydrolase activity	GO:0006508//proteolysis;GO:0007283//spermatogenesis
ENSG00000007047	9.96	15.06	15.94	14.98	17.56	21.68	19.89	18.26	507	814	801	733	1066	1177	1074	1014	MARK4	microtubule affinity regulating kinase 4 [Source:HGNC Symbol;Acc:HGNC:13538]	-	-	-	-	GO:0000930//gamma-tubulin complex;GO:0005737//cytoplasm;GO:0005813//centrosome;GO:0005815//microtubule organizing center;GO:0005829//cytosol;GO:0005856//cytoskeleton;GO:0005874//microtubule;GO:0015630//microtubule cytoskeleton;GO:0030425//dendrite;GO:0030496//midbody;GO:0036064//ciliary basal body;GO:0042995//cell projection;GO:0043005//neuron projection	GO:0000166//nucleotide binding;GO:0004672//protein kinase activity;GO:0004674//protein serine/threonine kinase activity;GO:0005515//protein binding;GO:0005524//ATP binding;GO:0008017//microtubule binding;GO:0016301//kinase activity;GO:0016740//transferase activity;GO:0043015//gamma-tubulin binding;GO:0043130//ubiquitin binding;GO:0048156//tau protein binding;GO:0050321//tau-protein kinase activity	GO:0000082//G1/S transition of mitotic cell cycle;GO:0000086//G2/M transition of mitotic cell cycle;GO:0000226//microtubule cytoskeleton organization;GO:0001578//microtubule bundle formation;GO:0006468//protein phosphorylation;GO:0007049//cell cycle;GO:0007399//nervous system development;GO:0008284//positive regulation of cell proliferation;GO:0016055//Wnt signaling pathway;GO:0016310//phosphoryl…
ENSG00000007062	0.24	0.06	0.18	0.27	0.23	0.26	0.31	0.24	13	6	17	14	23	24	22	22	PROM1	prominin 1 [Source:HGNC Symbol;Acc:HGNC:9454]	Human Diseases	Cancers	ko05202//Transcriptional misregulation in cancers	K06532	GO:0001750//photoreceptor outer segment;GO:0005615//extracellular space;GO:0005783//endoplasmic reticulum;GO:0005793//endoplasmic reticulum-Golgi intermediate compartment;GO:0005886//plasma membrane;GO:0005887//integral component of plasma membrane;GO:0005902//microvillus;GO:0005929//cilium;GO:0009986//cell surface;GO:0016020//membrane;GO:0016021//integral component of membrane;GO:0016324//apical…	GO:0005515//protein binding;GO:0015485//cholesterol binding;GO:0042805//actinin binding;GO:0045296//cadherin binding	GO:0010842//retina layer formation;GO:0045494//photoreceptor cell maintenance;GO:0060042//retina morphogenesis in camera-type eye;GO:0060219//camera-type eye photoreceptor cell differentiation;GO:0072112//glomerular visceral epithelial cell differentiation;GO:0072139//glomerular parietal epithelial cell differentiation;GO:2000768//positive regulation of nephron tubule epithelial cell differentiat…
ENSG00000007080	17.51	39.86	36.8	38.55	38.51	35.59	37.57	35.23	331	931	848	807	921	927	928	877	CCDC124	coiled-coil domain containing 124 [Source:HGNC Symbol;Acc:HGNC:25171]	-	-	-	-	GO:0005737//cytoplasm;GO:0005815//microtubule organizing center;GO:0005829//cytosol;GO:0005856//cytoskeleton;GO:0005886//plasma membrane;GO:0030496//midbody	GO:0003723//RNA binding	GO:0007049//cell cycle;GO:0051301//cell division
ENSG00000007129	0	0	0	0	0	0	0	0.03	0	0	0	0	0	0	0	1	CEACAM21	CEA cell adhesion molecule 21 [Source:HGNC Symbol;Acc:HGNC:28834]	-	-	-	-	GO:0016020//membrane;GO:0016021//integral component of membrane	-	-
ENSG00000007168	24.49	23.5	25	23.42	22.04	19.92	20.3	21.13	1963	2282	2268	2100	2108	1850	1870	2276	PAFAH1B1	platelet activating factor acetylhydrolase 1b regulatory subunit 1 [Source:HGNC Symbol;Acc:HGNC:8574]	Metabolism;Metabolism	Global and overview maps;Lipid metabolism	ko01100//Metabolic pathways;ko00565//Ether lipid metabolism	K16794;K16794	GO:0000235//astral microtubule;GO:0000776//kinetochore;GO:0005634//nucleus;GO:0005635//nuclear envelope;GO:0005737//cytoplasm;GO:0005813//centrosome;GO:0005815//microtubule organizing center;GO:0005819//spindle;GO:0005829//cytosol;GO:0005856//cytoskeleton;GO:0005871//kinesin complex;GO:0005874//microtubule;GO:0005875//microtubule associated complex;GO:0005881//cytoplasmic microtubule;GO:0005938//…	GO:0005515//protein binding;GO:0008017//microtubule binding;GO:0008201//heparin binding;GO:0034452//dynactin binding;GO:0042802//identical protein binding;GO:0043274//phospholipase binding;GO:0044877//protein-containing complex binding;GO:0045505//dynein intermediate chain binding;GO:0046982//protein heterodimerization activity;GO:0051010//microtubule plus-end binding;GO:0051219//phosphoprotein b…	GO:0000086//G2/M transition of mitotic cell cycle;GO:0000132//establishment of mitotic spindle orientation;GO:0000226//microtubule cytoskeleton organization;GO:0001667//ameboidal-type cell migration;GO:0001675//acrosome assembly;GO:0001764//neuron migration;GO:0001961//positive regulation of cytokine-mediated signaling pathway;GO:0006629//lipid metabolic process;GO:0007017//microtubule-based proc…
ENSG00000007171	0.05	0	0.04	0	0.01	0	0	0	3	0	4	0	1	0	0	0	NOS2	nitric oxide synthase 2 [Source:HGNC Symbol;Acc:HGNC:7873]	Metabolism;Human Diseases;Human Diseases;Environmental Information Processing;Human Diseases;Human Diseases;Human Diseases;Environmental Information Processing;Organismal Systems;Environmental Information Processing;Human Diseases;Human Diseases;Human Diseases;Cellular Processes;Human Diseases;Metabolism;Metabolism	Global and overview maps;Cancers;Neurodegenerative diseases;Signal transduction;Infectious diseases;Infectious diseases;Infectious diseases;Signal transduction;Endocrine system;Signal transduction;Infectious diseases;Infectious diseases;Cancers;Transport and catabolism;Infectious diseases;Amino acid metabolism;Amino acid metabolism	ko01100//Metabolic pathways;ko05200//Pathways in cancer;ko05010//Alzheimer disease;ko04020//Calcium signaling pathway;ko05152//Tuberculosis;ko05146//Amoebiasis;ko05140//Leishmaniasis;ko04371//Apelin signaling pathway;ko04926//Relaxin signaling pathway;ko04066//HIF-1 signaling pathway;ko05145//Toxoplasmosis;ko05142//Chagas disease (American trypanosomiasis);ko05222//Small cell lung cancer;ko04146/…	K13241;K13241;K13241;K13241;K13241;K13241;K13241;K13241;K13241;K13241;K13241;K13241;K13241;K13241;K13241;K13241;K13241	GO:0005634//nucleus;GO:0005737//cytoplasm;GO:0005777//peroxisome;GO:0005782//peroxisomal matrix;GO:0005829//cytosol;GO:0005886//plasma membrane;GO:0012506//vesicle membrane;GO:0030863//cortical cytoskeleton;GO:0048471//perinuclear region of cytoplasm	GO:0003958//NADPH-hemoprotein reductase activity;GO:0004517//nitric-oxide synthase activity;GO:0005515//protein binding;GO:0005516//calmodulin binding;GO:0010181//FMN binding;GO:0016491//oxidoreductase activity;GO:0016709//oxidoreductase activity, acting on paired donors, with incorporation or reduction of molecular oxygen, NAD(P)H as one donor, and incorporation of one atom of oxygen;GO:0020037/…	GO:0001666//response to hypoxia;GO:0001912//positive regulation of leukocyte mediated cytotoxicity;GO:0002227//innate immune response in mucosa;GO:0006527//arginine catabolic process;GO:0006625//protein targeting to peroxisome;GO:0006801//superoxide metabolic process;GO:0006809//nitric oxide biosynthetic process;GO:0006954//inflammatory response;GO:0007263//nitric oxide mediated signal transducti…
ENSG00000007174	0	0	0	0	0	0	0	0	0	0	0	0	0	0	0	0	DNAH9	dynein axonemal heavy chain 9 [Source:HGNC Symbol;Acc:HGNC:2953]	Human Diseases	Neurodegenerative diseases	ko05016//Huntington disease	K10408	GO:0005737//cytoplasm;GO:0005856//cytoskeleton;GO:0005874//microtubule;GO:0005929//cilium;GO:0005930//axoneme;GO:0030286//dynein complex;GO:0031514//motile cilium;GO:0036157//outer dynein arm;GO:0042995//cell projection;GO:0097729//9+2 motile cilium;GO:0120135//distal portion of axoneme	GO:0000166//nucleotide binding;GO:0003774//motor activity;GO:0003777//microtubule motor activity;GO:0005515//protein binding;GO:0005524//ATP binding;GO:0008569//ATP-dependent microtubule motor activity, minus-end-directed;GO:0045505//dynein intermediate chain binding;GO:0051959//dynein light intermediate chain binding	GO:0003341//cilium movement;GO:0007018//microtubule-based movement;GO:0030030//cell projection organization
ENSG00000007202	38.4	35.6	34.97	36.45	36.58	36.56	33.14	33.76	4278	6010	5807	5557	6495	6272	5934	6189	KIAA0100	KIAA0100 [Source:HGNC Symbol;Acc:HGNC:28960]	-	-	-	-	GO:0005576//extracellular region	GO:0005515//protein binding	-
ENSG00000007216	0	0.04	0.02	0.04	0.06	0.03	0.04	0.03	0	2	1	1	2	2	2	1	SLC13A2	solute carrier family 13 member 2 [Source:HGNC Symbol;Acc:HGNC:10917]	-	-	-	-	GO:0005886//plasma membrane;GO:0005887//integral component of plasma membrane;GO:0016020//membrane;GO:0016021//integral component of membrane;GO:0070062//extracellular exosome	GO:0005515//protein binding;GO:0015141//succinate transmembrane transporter activity;GO:0015293//symporter activity;GO:0015361//low-affinity sodium:dicarboxylate symporter activity;GO:0022857//transmembrane transporter activity	GO:0006811//ion transport;GO:0006814//sodium ion transport;GO:0055085//transmembrane transport;GO:0071422//succinate transmembrane transport;GO:0098656//anion transmembrane transport
ENSG00000007237	4.28	5.28	5.09	5	5.69	5.53	5.2	4.71	454	599	565	516	663	727	638	663	GAS7	growth arrest specific 7 [Source:HGNC Symbol;Acc:HGNC:4169]	-	-	-	-	GO:0005737//cytoplasm;GO:0005856//cytoskeleton;GO:0005884//actin filament;GO:0005886//plasma membrane	GO:0005515//protein binding;GO:0008092//cytoskeletal protein binding;GO:0042802//identical protein binding;GO:0051015//actin filament binding	GO:0007275//multicellular organism development;GO:0007399//nervous system development;GO:0030041//actin filament polymerization;GO:0030154//cell differentiation;GO:0048812//neuron projection morphogenesis
ENSG00000007255	2.02	2.33	2.17	2.97	4	2.89	2.98	3.23	25	39	36	47	74	60	54	59	TRAPPC6A	trafficking protein particle complex 6A [Source:HGNC Symbol;Acc:HGNC:23069]	-	-	-	-	GO:0000139//Golgi membrane;GO:0005783//endoplasmic reticulum;GO:0005794//Golgi apparatus;GO:0005801//cis-Golgi network;GO:0005802//trans-Golgi network;GO:0005829//cytosol;GO:0030008//TRAPP complex	GO:0005515//protein binding	GO:0006888//ER to Golgi vesicle-mediated transport;GO:0016192//vesicle-mediated transport;GO:0043087//regulation of GTPase activity;GO:0043473//pigmentation;GO:0048193//Golgi vesicle transport;GO:0048208//COPII vesicle coating;GO:1903232//melanosome assembly
ENSG00000007264	0.06	0.08	0.02	0.21	0.43	0.41	0.4	0.44	1	3	1	4	14	18	15	14	MATK	megakaryocyte-associated tyrosine kinase [Source:HGNC Symbol;Acc:HGNC:6906]	Organismal Systems	Nervous system	ko04722//Neurotrophin signaling pathway	K08888	GO:0005737//cytoplasm;GO:0005829//cytosol;GO:0016020//membrane	GO:0000166//nucleotide binding;GO:0004672//protein kinase activity;GO:0004713//protein tyrosine kinase activity;GO:0004715//non-membrane spanning protein tyrosine kinase activity;GO:0005515//protein binding;GO:0005524//ATP binding;GO:0016301//kinase activity;GO:0016740//transferase activity	GO:0006468//protein phosphorylation;GO:0008284//positive regulation of cell proliferation;GO:0016310//phosphorylation;GO:0018108//peptidyl-tyrosine phosphorylation;GO:0038128//ERBB2 signaling pathway
ENSG00000007306	0	0.11	0.02	0.04	0.03	0	0	0	0	6	1	2	2	0	0	0	CEACAM7	CEA cell adhesion molecule 7 [Source:HGNC Symbol;Acc:HGNC:1819]	-	-	-	-	GO:0005576//extracellular region;GO:0005886//plasma membrane;GO:0016020//membrane;GO:0016324//apical plasma membrane;GO:0031225//anchored component of membrane	-	-
ENSG00000007312	0	0	0	0.04	0	0.03	0	0.03	0	0	0	1	0	1	0	1	CD79B	CD79b molecule [Source:HGNC Symbol;Acc:HGNC:1699]	Organismal Systems	Immune system	ko04662//B cell receptor signaling pathway	K06507	GO:0005654//nucleoplasm;GO:0005829//cytosol;GO:0005886//plasma membrane;GO:0005887//integral component of plasma membrane;GO:0009897//external side of plasma membrane;GO:0016020//membrane;GO:0016021//integral component of membrane;GO:0019815//B cell receptor complex;GO:0070062//extracellular exosome	GO:0004888//transmembrane signaling receptor activity;GO:0005515//protein binding;GO:0042802//identical protein binding	GO:0002250//adaptive immune response;GO:0002376//immune system process;GO:0006955//immune response;GO:0007165//signal transduction;GO:0007166//cell surface receptor signaling pathway;GO:0030183//B cell differentiation;GO:0050853//B cell receptor signaling pathway
ENSG00000007314	0.01	0.02	0	0.01	0.01	0.01	0.02	0.01	1	3	0	2	2	2	4	3	SCN4A	sodium voltage-gated channel alpha subunit 4 [Source:HGNC Symbol;Acc:HGNC:10591]	-	-	-	-	GO:0001518//voltage-gated sodium channel complex;GO:0005886//plasma membrane;GO:0005887//integral component of plasma membrane;GO:0016020//membrane;GO:0016021//integral component of membrane;GO:0030424//axon	GO:0005216//ion channel activity;GO:0005244//voltage-gated ion channel activity;GO:0005248//voltage-gated sodium channel activity;GO:0005261//cation channel activity;GO:0005272//sodium channel activity;GO:0005515//protein binding	GO:0006811//ion transport;GO:0006814//sodium ion transport;GO:0006936//muscle contraction;GO:0019228//neuronal action potential;GO:0034765//regulation of ion transmembrane transport;GO:0035725//sodium ion transmembrane transport;GO:0055085//transmembrane transport;GO:0086010//membrane depolarization during action potential;GO:0100001//regulation of skeletal muscle contraction by action potential
ENSG00000007341	2.67	2.01	2.27	1.66	1.94	2.11	2.47	2.24	154.18	141.09	136.08	114.23	137.69	149.42	167.34	166.18	ST7L	suppression of tumorigenicity 7 like [Source:HGNC Symbol;Acc:HGNC:18441]	-	-	-	-	GO:0016020//membrane;GO:0016021//integral component of membrane	GO:0005515//protein binding	GO:0030308//negative regulation of cell growth
ENSG00000007350	0.04	0	0	0	0.02	0.01	0	0.02	2	0	0	0	1	1	0	1	TKTL1	transketolase like 1 [Source:HGNC Symbol;Acc:HGNC:11835]	Metabolism;Metabolism;Metabolism;Metabolism	Global and overview maps;Global and overview maps;Global and overview maps;Carbohydrate metabolism	ko01100//Metabolic pathways;ko01200//Carbon metabolism;ko01230//Biosynthesis of amino acids;ko00030//Pentose phosphate pathway	K00615;K00615;K00615;K00615	GO:0005634//nucleus;GO:0005737//cytoplasm;GO:0005829//cytosol	GO:0003824//catalytic activity;GO:0004802//transketolase activity;GO:0016740//transferase activity;GO:0030976//thiamine pyrophosphate binding;GO:0046872//metal ion binding	GO:0006007//glucose catabolic process;GO:0006772//thiamine metabolic process
ENSG00000007372	0.04	0.12	0.1	0.02	0.21	0.29	0	0.14	1	5	3	1	7	20.1	0	5	PAX6	paired box 6 [Source:HGNC Symbol;Acc:HGNC:8620]	Cellular Processes;Human Diseases	Cellular community - eukaryotes;Endocrine and metabolic diseases	ko04550//Signaling pathways regulating pluripotency of stem cells;ko04950//Maturity onset diabetes of the young	K08031;K08031	GO:0000785//chromatin;GO:0005634//nucleus;GO:0005654//nucleoplasm;GO:0005737//cytoplasm;GO:0005829//cytosol;GO:0016020//membrane;GO:0016021//integral component of membrane	GO:0000976//transcription regulatory region sequence-specific DNA binding;GO:0000978//RNA polymerase II proximal promoter sequence-specific DNA binding;GO:0000979//RNA polymerase II core promoter sequence-specific DNA binding;GO:0000981//DNA-binding transcription factor activity, RNA polymerase II-specific;GO:0001227//DNA-binding transcription repressor activity, RNA polymerase II-specific;GO:000…	GO:0000122//negative regulation of transcription by RNA polymerase II;GO:0000132//establishment of mitotic spindle orientation;GO:0001568//blood vessel development;GO:0001654//eye development;GO:0001709//cell fate determination;GO:0001764//neuron migration;GO:0001933//negative regulation of protein phosphorylation;GO:0002052//positive regulation of neuroblast proliferation;GO:0002088//lens develo…
ENSG00000007376	8.14	13.39	13.47	16.09	13.75	13.92	12.53	11.23	278	571	582	580	599	587.97	573	514	RPUSD1	RNA pseudouridine synthase domain containing 1 [Source:HGNC Symbol;Acc:HGNC:14173]	-	-	-	-	GO:0005575//cellular_component	GO:0003674//molecular_function;GO:0003723//RNA binding;GO:0005515//protein binding;GO:0009982//pseudouridine synthase activity	GO:0000455//enzyme-directed rRNA pseudouridine synthesis;GO:0001522//pseudouridine synthesis;GO:0008150//biological_process;GO:0009451//RNA modification
ENSG00000007384	1.42	1.78	1.09	1.57	1.81	1.43	1.87	1.32	54	103	61	95	130	114	117	94	RHBDF1	rhomboid 5 homolog 1 [Source:HGNC Symbol;Acc:HGNC:20561]	-	-	-	-	GO:0000139//Golgi membrane;GO:0005783//endoplasmic reticulum;GO:0005789//endoplasmic reticulum membrane;GO:0005794//Golgi apparatus;GO:0016020//membrane;GO:0016021//integral component of membrane	GO:0004252//serine-type endopeptidase activity;GO:0005515//protein binding;GO:0019838//growth factor binding	GO:0006508//proteolysis;GO:0008283//cell proliferation;GO:0015031//protein transport;GO:0016477//cell migration;GO:0042058//regulation of epidermal growth factor receptor signaling pathway;GO:0050708//regulation of protein secretion;GO:0050709//negative regulation of protein secretion;GO:0061136//regulation of proteasomal protein catabolic process
ENSG00000007392	19.57	28.34	28.38	25.39	26.32	23.46	25.35	26.98	575	979	972	781	958	921	901	991	LUC7L	LUC7 like [Source:HGNC Symbol;Acc:HGNC:6723]	-	-	-	-	GO:0005685//U1 snRNP;GO:0071004//U2-type prespliceosome	GO:0003729//mRNA binding;GO:0005515//protein binding;GO:0042802//identical protein binding	GO:0006376//mRNA splice site selection
ENSG00000007402	0.02	0.02	0.02	0.03	0.01	0.02	0.02	0.01	2	2	2	3	1	3	3	2	CACNA2D2	calcium voltage-gated channel auxiliary subunit alpha2delta 2 [Source:HGNC Symbol;Acc:HGNC:1400]	Environmental Information Processing;Human Diseases;Organismal Systems;Organismal Systems;Human Diseases;Organismal Systems;Human Diseases	Signal transduction;Cardiovascular diseases;Endocrine system;Circulatory system;Cardiovascular diseases;Circulatory system;Cardiovascular diseases	ko04010//MAPK signaling pathway;ko05414//Dilated cardiomyopathy (DCM);ko04921//Oxytocin signaling pathway;ko04261//Adrenergic signaling in cardiomyocytes;ko05410//Hypertrophic cardiomyopathy (HCM);ko04260//Cardiac muscle contraction;ko05412//Arrhythmogenic right ventricular cardiomyopathy (ARVC)	K04859;K04859;K04859;K04859;K04859;K04859;K04859	GO:0005886//plasma membrane;GO:0005891//voltage-gated calcium channel complex;GO:0016020//membrane;GO:0016021//integral component of membrane	GO:0005244//voltage-gated ion channel activity;GO:0005245//voltage-gated calcium channel activity;GO:0005262//calcium channel activity;GO:0046872//metal ion binding	GO:0006811//ion transport;GO:0006816//calcium ion transport;GO:0034765//regulation of ion transmembrane transport;GO:0050796//regulation of insulin secretion;GO:0061337//cardiac conduction;GO:0070588//calcium ion transmembrane transport
ENSG00000007516	0.66	0.77	1.24	0.95	1.45	0.89	0.81	1.16	35	82.06	89.07	93.04	116.03	108	89	105.17	BAIAP3	BAI1 associated protein 3 [Source:HGNC Symbol;Acc:HGNC:948]	Human Diseases	Cancers	ko05202//Transcriptional misregulation in cancers	K15621	GO:0005737//cytoplasm;GO:0005768//endosome;GO:0005794//Golgi apparatus;GO:0005829//cytosol;GO:0005886//plasma membrane;GO:0016020//membrane;GO:0031902//late endosome membrane;GO:0032588//trans-Golgi network membrane;GO:0055038//recycling endosome membrane;GO:0098793//presynapse	GO:0000149//SNARE binding;GO:0005509//calcium ion binding;GO:0005515//protein binding;GO:0005543//phospholipid binding;GO:0019905//syntaxin binding;GO:0046872//metal ion binding	GO:0001956//positive regulation of neurotransmitter secretion;GO:0006887//exocytosis;GO:0007186//G protein-coupled receptor signaling pathway;GO:0032228//regulation of synaptic transmission, GABAergic;GO:0035774//positive regulation of insulin secretion involved in cellular response to glucose stimulus;GO:0042147//retrograde transport, endosome to Golgi;GO:1905413//regulation of dense core granul…
ENSG00000007520	13.8	25.21	22.49	25.71	26.84	21.01	24.72	23.44	319	686.94	612.93	642.96	783.97	667	735	712.83	TSR3	TSR3 ribosome maturation factor [Source:HGNC Symbol;Acc:HGNC:14175]	-	-	-	-	GO:0005737//cytoplasm;GO:0005829//cytosol	GO:0016740//transferase activity;GO:1904047//S-adenosyl-L-methionine binding	GO:0000154//rRNA modification;GO:0000455//enzyme-directed rRNA pseudouridine synthesis;GO:0006364//rRNA processing;GO:0030490//maturation of SSU-rRNA;GO:0042254//ribosome biogenesis
ENSG00000007541	5.79	7.68	8.35	8.13	8.58	10.01	9.16	7.68	244	434	411	395	504	564	506	452	PIGQ	phosphatidylinositol glycan anchor biosynthesis class Q [Source:HGNC Symbol;Acc:HGNC:14135]	Metabolism;Metabolism	Global and overview maps;Glycan biosynthesis and metabolism	ko01100//Metabolic pathways;ko00563//Glycosylphosphatidylinositol(GPI)-anchor biosynthesis	K03860;K03860	GO:0000506//glycosylphosphatidylinositol-N-acetylglucosaminyltransferase (GPI-GnT) complex;GO:0005789//endoplasmic reticulum membrane;GO:0016020//membrane;GO:0016021//integral component of membrane	GO:0016740//transferase activity;GO:0016757//transferase activity, transferring glycosyl groups;GO:0017176//phosphatidylinositol N-acetylglucosaminyltransferase activity	GO:0005975//carbohydrate metabolic process;GO:0006506//GPI anchor biosynthetic process;GO:0016254//preassembly of GPI anchor in ER membrane
ENSG00000007545	5.18	4.64	5.88	5.9	12.03	5.25	6.37	5.15	526.3	757.98	783.81	793.96	839.34	870.8	824.38	864.11	CRAMP1	cramped chromatin regulator homolog 1 [Source:HGNC Symbol;Acc:HGNC:14122]	-	-	-	-	GO:0005634//nucleus	GO:0003677//DNA binding;GO:0003682//chromatin binding	GO:0007389//pattern specification process
ENSG00000007866	13.28	17.08	16.3	17.19	18.06	18.52	17.06	15.47	774	1210	1132	1098	1347	1465	1268	1190	TEAD3	TEA domain transcription factor 3 [Source:HGNC Symbol;Acc:HGNC:11716]	Environmental Information Processing;Environmental Information Processing	Signal transduction;Signal transduction	ko04390//Hippo signaling pathway;ko04392//Hippo signaling pathway - multiple species	K09448;K09448	GO:0000785//chromatin;GO:0005634//nucleus;GO:0005654//nucleoplasm;GO:0005667//transcription factor complex	GO:0000978//RNA polymerase II proximal promoter sequence-specific DNA binding;GO:0000981//DNA-binding transcription factor activity, RNA polymerase II-specific;GO:0001085//RNA polymerase II transcription factor binding;GO:0003677//DNA binding;GO:0003700//DNA-binding transcription factor activity;GO:0005515//protein binding	GO:0006355//regulation of transcription, DNA-templated;GO:0006357//regulation of transcription by RNA polymerase II;GO:0006367//transcription initiation from RNA polymerase II promoter;GO:0007565//female pregnancy;GO:0035329//hippo signaling;GO:0045944//positive regulation of transcription by RNA polymerase II;GO:0048568//embryonic organ development;GO:0055059//asymmetric neuroblast division
ENSG00000007908	0.02	0	0	0	0.05	0.01	0.01	0.01	1	0	0	0	4	1	1	1	SELE	selectin E [Source:HGNC Symbol;Acc:HGNC:10718]	Environmental Information Processing;Human Diseases;Environmental Information Processing;Human Diseases;Human Diseases;Human Diseases	Signaling molecules and interaction;Cardiovascular diseases;Signal transduction;Infectious diseases;Endocrine and metabolic diseases;Infectious diseases	ko04514//Cell adhesion molecules (CAMs);ko05418//Fluid shear stress and atherosclerosis;ko04668//TNF signaling pathway;ko05143//African trypanosomiasis;ko04933//AGE-RAGE signaling pathway in diabetic complications;ko05144//Malaria	K06494;K06494;K06494;K06494;K06494;K06494	GO:0005615//extracellular space;GO:0005886//plasma membrane;GO:0005887//integral component of plasma membrane;GO:0005901//caveola;GO:0005905//clathrin-coated pit;GO:0016020//membrane;GO:0016021//integral component of membrane;GO:0030863//cortical cytoskeleton;GO:0045121//membrane raft;GO:0048471//perinuclear region of cytoplasm	GO:0004888//transmembrane signaling receptor activity;GO:0005515//protein binding;GO:0030246//carbohydrate binding;GO:0033691//sialic acid binding;GO:0043274//phospholipase binding;GO:0046872//metal ion binding;GO:0070492//oligosaccharide binding	GO:0002092//positive regulation of receptor internalization;GO:0002523//leukocyte migration involved in inflammatory response;GO:0006954//inflammatory response;GO:0007155//cell adhesion;GO:0007157//heterophilic cell-cell adhesion via plasma membrane cell adhesion molecules;GO:0007159//leukocyte cell-cell adhesion;GO:0007202//activation of phospholipase C activity;GO:0019722//calcium-mediated sign…
ENSG00000007923	27.06	33.1	32.09	33.41	29.14	30.98	30.21	29.35	1653.48	2432.98	2284.1	2241.4	2279.04	2575.08	2381.45	2361.98	DNAJC11	DnaJ heat shock protein family (Hsp40) member C11 [Source:HGNC Symbol;Acc:HGNC:25570]	-	-	-	-	GO:0001401//mitochondrial sorting and assembly machinery complex;GO:0005654//nucleoplasm;GO:0005739//mitochondrion;GO:0005741//mitochondrial outer membrane;GO:0016020//membrane;GO:0016607//nuclear speck;GO:0061617//MICOS complex	GO:0005515//protein binding	GO:0007007//inner mitochondrial membrane organization;GO:0042407//cristae formation
ENSG00000007933	0	0	0	0	0.02	0	0	0	0	0	0	0	1	0	0	0	FMO3	flavin containing dimethylaniline monoxygenase 3 [Source:HGNC Symbol;Acc:HGNC:3771]	Metabolism	Xenobiotics biodegradation and metabolism	ko00982//Drug metabolism - cytochrome P450	K00485	GO:0005783//endoplasmic reticulum;GO:0005789//endoplasmic reticulum membrane;GO:0016020//membrane;GO:0016021//integral component of membrane;GO:0031090//organelle membrane;GO:0043231//intracellular membrane-bounded organelle	GO:0004497//monooxygenase activity;GO:0004499//N,N-dimethylaniline monooxygenase activity;GO:0005515//protein binding;GO:0016491//oxidoreductase activity;GO:0034899//trimethylamine monooxygenase activity;GO:0050660//flavin adenine dinucleotide binding;GO:0050661//NADP binding	GO:0006805//xenobiotic metabolic process;GO:0055114//oxidation-reduction process
ENSG00000007944	0.92	1.12	1.09	1.38	1.26	0.78	0.99	1.05	55	82	78	91	97	64	76	83	MYLIP	myosin regulatory light chain interacting protein [Source:HGNC Symbol;Acc:HGNC:21155]	Organismal Systems	Digestive system	ko04979//Cholesterol metabolism	K10637	GO:0005737//cytoplasm;GO:0005829//cytosol;GO:0005856//cytoskeleton;GO:0005886//plasma membrane;GO:0016020//membrane	GO:0004842//ubiquitin-protein transferase activity;GO:0005515//protein binding;GO:0008092//cytoskeletal protein binding;GO:0016740//transferase activity;GO:0046872//metal ion binding;GO:0061630//ubiquitin protein ligase activity	GO:0000209//protein polyubiquitination;GO:0006511//ubiquitin-dependent protein catabolic process;GO:0007399//nervous system development;GO:0010977//negative regulation of neuron projection development;GO:0010989//negative regulation of low-density lipoprotein particle clearance;GO:0016567//protein ubiquitination;GO:0031648//protein destabilization;GO:0032802//low-density lipoprotein particle rece…
ENSG00000007952	0	0	0	0.02	0.02	0.02	0	0	0	0	0	1	1	1	0	0	NOX1	NADPH oxidase 1 [Source:HGNC Symbol;Acc:HGNC:7889]	Human Diseases;Human Diseases;Organismal Systems;Human Diseases	Neurodegenerative diseases;Cardiovascular diseases;Development;Endocrine and metabolic diseases	ko05010//Alzheimer disease;ko05418//Fluid shear stress and atherosclerosis;ko04380//Osteoclast differentiation;ko04933//AGE-RAGE signaling pathway in diabetic complications	K08008;K08008;K08008;K08008	GO:0005737//cytoplasm;GO:0005768//endosome;GO:0005769//early endosome;GO:0005886//plasma membrane;GO:0016020//membrane;GO:0016021//integral component of membrane;GO:0030054//cell junction;GO:0042995//cell projection;GO:0043020//NADPH oxidase complex;GO:0071438//invadopodium membrane	GO:0005244//voltage-gated ion channel activity;GO:0005515//protein binding;GO:0016175//superoxide-generating NADPH oxidase activity;GO:0016491//oxidoreductase activity;GO:0031267//small GTPase binding;GO:0046872//metal ion binding;GO:0050661//NADP binding	GO:0001525//angiogenesis;GO:0003081//regulation of systemic arterial blood pressure by renin-angiotensin;GO:0006739//NADP metabolic process;GO:0006811//ion transport;GO:0006952//defense response;GO:0006954//inflammatory response;GO:0007165//signal transduction;GO:0008217//regulation of blood pressure;GO:0008284//positive regulation of cell proliferation;GO:0010575//positive regulation of vascular…
ENSG00000007968	2.79	3.68	3.61	3.54	3.69	2.94	3.15	3.08	283	458	438	395	479	408	411	412	E2F2	E2F transcription factor 2 [Source:HGNC Symbol;Acc:HGNC:3114]	Human Diseases;Human Diseases;Human Diseases;Human Diseases;Human Diseases;Human Diseases;Human Diseases;Human Diseases;Cellular Processes;Human Diseases;Human Diseases;Human Diseases;Human Diseases;Cellular Processes;Human Diseases;Human Diseases;Human Diseases;Human Diseases;Human Diseases;Human Diseases;Human Diseases;Human Diseases;Human Diseases	Cancers;Infectious diseases;Infectious diseases;Infectious diseases;Infectious diseases;Cancers;Cancers;Infectious diseases;Cell growth and death;Infectious diseases;Endocrine and metabolic diseases;Cancers;Cancers;Cell growth and death;Drug resistance;Cancers;Cancers;Cancers;Cancers;Cancers;Cancers;Cancers;Cancers	ko05200//Pathways in cancer;ko05169//Epstein-Barr virus infection;ko05163//Human cytomegalovirus infection;ko05166//HTLV-I infection;ko05167//Kaposi sarcoma-associated herpesvirus infection;ko05206//MicroRNAs in cancer;ko05225//Hepatocellular carcinoma;ko05161//Hepatitis B;ko04218//Cellular senescence;ko05160//Hepatitis C;ko04934//Cushing syndrome;ko05224//Breast cancer;ko05226//Gastric cancer;ko…	K09389;K09389;K09389;K09389;K09389;K09389;K09389;K09389;K09389;K09389;K09389;K09389;K09389;K09389;K09389;K09389;K09389;K09389;K09389;K09389;K09389;K09389;K09389	GO:0000785//chromatin;GO:0005634//nucleus;GO:0005654//nucleoplasm;GO:0005667//transcription factor complex;GO:0090575//RNA polymerase II transcription factor complex	GO:0000977//RNA polymerase II regulatory region sequence-specific DNA binding;GO:0000978//RNA polymerase II proximal promoter sequence-specific DNA binding;GO:0000981//DNA-binding transcription factor activity, RNA polymerase II-specific;GO:0000987//proximal promoter sequence-specific DNA binding;GO:0001228//DNA-binding transcription activator activity, RNA polymerase II-specific;GO:0003677//DNA …	GO:0006355//regulation of transcription, DNA-templated;GO:0006357//regulation of transcription by RNA polymerase II;GO:0006367//transcription initiation from RNA polymerase II promoter;GO:0007049//cell cycle;GO:0045944//positive regulation of transcription by RNA polymerase II;GO:0051726//regulation of cell cycle;GO:0072332//intrinsic apoptotic signaling pathway by p53 class mediator;GO:1903671//…
ENSG00000008018	141.31	174.3	187.02	179.53	177.66	142.76	160.46	174.81	2457	3716	3889	3438	3955	3392	3590	4016	PSMB1	proteasome 20S subunit beta 1 [Source:HGNC Symbol;Acc:HGNC:9537]	Genetic Information Processing	Folding, sorting and degradation	ko03050//Proteasome	K02732	GO:0000502//proteasome complex;GO:0005576//extracellular region;GO:0005634//nucleus;GO:0005654//nucleoplasm;GO:0005737//cytoplasm;GO:0005829//cytosol;GO:0005839//proteasome core complex;GO:0019774//proteasome core complex, beta-subunit complex;GO:0034774//secretory granule lumen;GO:0070062//extracellular exosome;GO:1904813//ficolin-1-rich granule lumen	GO:0004175//endopeptidase activity;GO:0004298//threonine-type endopeptidase activity;GO:0005515//protein binding;GO:0008233//peptidase activity;GO:0016787//hydrolase activity	GO:0000165//MAPK cascade;GO:0000209//protein polyubiquitination;GO:0002223//stimulatory C-type lectin receptor signaling pathway;GO:0002479//antigen processing and presentation of exogenous peptide antigen via MHC class I, TAP-dependent;GO:0006508//proteolysis;GO:0006521//regulation of cellular amino acid metabolic process;GO:0010499//proteasomal ubiquitin-independent protein catabolic process;GO…
ENSG00000008056	1.37	0.59	0.83	0.92	1.02	0.97	0.91	1.13	40	44	39	24	34	44	48	35	SYN1	synapsin I [Source:HGNC Symbol;Acc:HGNC:11494]	-	-	-	-	GO:0000795//synaptonemal complex;GO:0005794//Golgi apparatus;GO:0005829//cytosol;GO:0005856//cytoskeleton;GO:0008021//synaptic vesicle;GO:0014069//postsynaptic density;GO:0030054//cell junction;GO:0030424//axon;GO:0030425//dendrite;GO:0030672//synaptic vesicle membrane;GO:0043229//intracellular organelle;GO:0045202//synapse;GO:0048786//presynaptic active zone;GO:0098685//Schaffer collateral - CA1…	GO:0003779//actin binding;GO:0005215//transporter activity;GO:0005515//protein binding;GO:0005524//ATP binding;GO:0019901//protein kinase binding;GO:0042802//identical protein binding;GO:0048306//calcium-dependent protein binding	GO:0007268//chemical synaptic transmission;GO:0007269//neurotransmitter secretion;GO:0046928//regulation of neurotransmitter secretion;GO:0048666//neuron development;GO:0050808//synapse organization;GO:0097091//synaptic vesicle clustering;GO:0098693//regulation of synaptic vesicle cycle;GO:0099504//synaptic vesicle cycle;GO:2000300//regulation of synaptic vesicle exocytosis
ENSG00000008083	6.31	6.98	7.03	7.29	7.75	8.1	7.57	7.89	725	983	967	918	1138	1270	1134	1203	JARID2	jumonji and AT-rich interaction domain containing 2 [Source:HGNC Symbol;Acc:HGNC:6196]	Cellular Processes	Cellular community - eukaryotes	ko04550//Signaling pathways regulating pluripotency of stem cells	K11478	GO:0005634//nucleus;GO:0005654//nucleoplasm;GO:0005739//mitochondrion;GO:0035097//histone methyltransferase complex;GO:0035098//ESC/E(Z) complex	GO:0003677//DNA binding;GO:0003682//chromatin binding;GO:0005515//protein binding;GO:0008134//transcription factor binding;GO:0032452//histone demethylase activity	GO:0000122//negative regulation of transcription by RNA polymerase II;GO:0001889//liver development;GO:0006325//chromatin organization;GO:0006338//chromatin remodeling;GO:0007275//multicellular organism development;GO:0007417//central nervous system development;GO:0008285//negative regulation of cell proliferation;GO:0010614//negative regulation of cardiac muscle hypertrophy;GO:0016577//histone d…
ENSG00000008086	2.58	2.56	2.13	2.11	2.01	1.91	1.74	1.84	575	580	530	489	461	513	481	504	CDKL5	cyclin dependent kinase like 5 [Source:HGNC Symbol;Acc:HGNC:11411]	-	-	-	-	GO:0005634//nucleus;GO:0005654//nucleoplasm;GO:0005737//cytoplasm;GO:0005813//centrosome;GO:0005815//microtubule organizing center;GO:0005856//cytoskeleton;GO:0032587//ruffle membrane;GO:0032839//dendrite cytoplasm;GO:0036064//ciliary basal body;GO:0042995//cell projection;GO:0044294//dendritic growth cone;GO:0045202//synapse;GO:0048471//perinuclear region of cytoplasm;GO:0097542//ciliary tip;GO:…	GO:0000166//nucleotide binding;GO:0004672//protein kinase activity;GO:0004674//protein serine/threonine kinase activity;GO:0004693//cyclin-dependent protein serine/threonine kinase activity;GO:0005515//protein binding;GO:0005524//ATP binding;GO:0016301//kinase activity;GO:0016740//transferase activity;GO:0031267//small GTPase binding	GO:0001764//neuron migration;GO:0006468//protein phosphorylation;GO:0016310//phosphorylation;GO:0043547//positive regulation of GTPase activity;GO:0045773//positive regulation of axon extension;GO:0046777//protein autophosphorylation;GO:0050773//regulation of dendrite development;GO:0050775//positive regulation of dendrite morphogenesis;GO:0051726//regulation of cell cycle;GO:0060999//positive re…
ENSG00000008118	0	0	0	0	0	0	0	0	0	0	0	0	0	0	0	0	CAMK1G	calcium/calmodulin dependent protein kinase IG [Source:HGNC Symbol;Acc:HGNC:14585]	Environmental Information Processing;Organismal Systems;Organismal Systems;Human Diseases	Signal transduction;Endocrine system;Endocrine system;Cancers	ko04020//Calcium signaling pathway;ko04921//Oxytocin signaling pathway;ko04925//Aldosterone synthesis and secretion;ko05214//Glioma	K08794;K08794;K08794;K08794	GO:0000139//Golgi membrane;GO:0005737//cytoplasm;GO:0005794//Golgi apparatus;GO:0005886//plasma membrane;GO:0005954//calcium- and calmodulin-dependent protein kinase complex;GO:0012505//endomembrane system;GO:0016020//membrane;GO:0043005//neuron projection	GO:0000166//nucleotide binding;GO:0003824//catalytic activity;GO:0004672//protein kinase activity;GO:0004674//protein serine/threonine kinase activity;GO:0004683//calmodulin-dependent protein kinase activity;GO:0005515//protein binding;GO:0005516//calmodulin binding;GO:0005524//ATP binding;GO:0016301//kinase activity;GO:0016740//transferase activity	GO:0006468//protein phosphorylation;GO:0008152//metabolic process;GO:0016310//phosphorylation;GO:0018105//peptidyl-serine phosphorylation
ENSG00000008128	9.25	12.57	10.02	12.49	10.12	9.94	11.61	9.91	369.65	723.91	604.2	617.01	596.45	659.02	699.55	644.81	CDK11A	cyclin dependent kinase 11A [Source:HGNC Symbol;Acc:HGNC:1730]	-	-	-	-	GO:0005634//nucleus;GO:0005737//cytoplasm	GO:0000166//nucleotide binding;GO:0004672//protein kinase activity;GO:0004674//protein serine/threonine kinase activity;GO:0004693//cyclin-dependent protein serine/threonine kinase activity;GO:0005515//protein binding;GO:0005524//ATP binding;GO:0016301//kinase activity;GO:0016740//transferase activity	GO:0000278//mitotic cell cycle;GO:0001558//regulation of cell growth;GO:0006355//regulation of transcription, DNA-templated;GO:0006468//protein phosphorylation;GO:0006915//apoptotic process;GO:0007049//cell cycle;GO:0007346//regulation of mitotic cell cycle;GO:0016310//phosphorylation;GO:0050684//regulation of mRNA processing
ENSG00000008130	23.61	32.9	35.74	33.5	34.91	29.71	32.17	33.47	1294	2340	2258	2132	2471	2458	2289	2462	NADK	NAD kinase [Source:HGNC Symbol;Acc:HGNC:29831]	Metabolism;Metabolism	Global and overview maps;Metabolism of cofactors and vitamins	ko01100//Metabolic pathways;ko00760//Nicotinate and nicotinamide metabolism	K00858;K00858	GO:0005829//cytosol	GO:0000166//nucleotide binding;GO:0003951//NAD+ kinase activity;GO:0005515//protein binding;GO:0005524//ATP binding;GO:0016301//kinase activity;GO:0016740//transferase activity;GO:0046872//metal ion binding	GO:0006741//NADP biosynthetic process;GO:0016310//phosphorylation;GO:0019674//NAD metabolic process;GO:0035774//positive regulation of insulin secretion involved in cellular response to glucose stimulus;GO:0046034//ATP metabolic process
ENSG00000008196	0	0	0.01	0	0	0.01	0	0	0	0	1	0	0	1	0	0	TFAP2B	transcription factor AP-2 beta [Source:HGNC Symbol;Acc:HGNC:11743]	-	-	-	-	GO:0000785//chromatin;GO:0005634//nucleus;GO:0005654//nucleoplasm	GO:0000977//RNA polymerase II regulatory region sequence-specific DNA binding;GO:0000978//RNA polymerase II proximal promoter sequence-specific DNA binding;GO:0000981//DNA-binding transcription factor activity, RNA polymerase II-specific;GO:0000987//proximal promoter sequence-specific DNA binding;GO:0001228//DNA-binding transcription activator activity, RNA polymerase II-specific;GO:0003677//DNA …	GO:0000122//negative regulation of transcription by RNA polymerase II;GO:0001822//kidney development;GO:0003091//renal water homeostasis;GO:0006006//glucose metabolic process;GO:0006355//regulation of transcription, DNA-templated;GO:0006357//regulation of transcription by RNA polymerase II;GO:0007423//sensory organ development;GO:0008284//positive regulation of cell proliferation;GO:0008285//nega…
ENSG00000008197	0	0	0	0	0	0	0	0	0	0	0	0	0	0	0	0	TFAP2D	transcription factor AP-2 delta [Source:HGNC Symbol;Acc:HGNC:15581]	-	-	-	-	GO:0000785//chromatin;GO:0005634//nucleus;GO:0005667//transcription factor complex	GO:0000977//RNA polymerase II regulatory region sequence-specific DNA binding;GO:0000981//DNA-binding transcription factor activity, RNA polymerase II-specific;GO:0003677//DNA binding;GO:0003700//DNA-binding transcription factor activity;GO:0005515//protein binding	GO:0006355//regulation of transcription, DNA-templated;GO:0006357//regulation of transcription by RNA polymerase II;GO:0042127//regulation of cell proliferation;GO:0043524//negative regulation of neuron apoptotic process;GO:0045893//positive regulation of transcription, DNA-templated;GO:0045944//positive regulation of transcription by RNA polymerase II;GO:0048856//anatomical structure development…
ENSG00000008226	0.02	0.04	0.05	0.05	0.04	0.05	0.04	0.05	2.02	6.1	8.13	8.13	6.1	9.11	7.1	8.15	DLEC1	DLEC1 cilia and flagella associated protein [Source:HGNC Symbol;Acc:HGNC:2899]	-	-	-	-	GO:0005737//cytoplasm;GO:0005829//cytosol	GO:0003674//molecular_function	GO:0008285//negative regulation of cell proliferation
ENSG00000008256	3.05	3.9	3.81	4.01	4.04	3.74	3.75	3.89	267	418	399	386	453	447	422	449	CYTH3	cytohesin 3 [Source:HGNC Symbol;Acc:HGNC:9504]	Human Diseases;Cellular Processes;Environmental Information Processing;Human Diseases	Infectious diseases;Transport and catabolism;Signal transduction;Infectious diseases	ko05130//Pathogenic Escherichia coli infection;ko04144//Endocytosis;ko04072//Phospholipase D signaling pathway;ko05132//Salmonella infection	K18441;K18441;K18441;K18441	GO:0000139//Golgi membrane;GO:0001726//ruffle;GO:0005654//nucleoplasm;GO:0005737//cytoplasm;GO:0005829//cytosol;GO:0005886//plasma membrane;GO:0005912//adherens junction;GO:0005923//bicellular tight junction;GO:0016020//membrane;GO:0030054//cell junction;GO:0031234//extrinsic component of cytoplasmic side of plasma membrane	GO:0005085//guanyl-nucleotide exchange factor activity;GO:0005086//ARF guanyl-nucleotide exchange factor activity;GO:0005515//protein binding;GO:0005547//phosphatidylinositol-3,4,5-trisphosphate binding;GO:0008289//lipid binding	GO:0032012//regulation of ARF protein signal transduction;GO:0045785//positive regulation of cell adhesion;GO:0048193//Golgi vesicle transport;GO:0050790//regulation of catalytic activity;GO:0090162//establishment of epithelial cell polarity
ENSG00000008277	3.67	3.92	3.66	3.82	3.88	3.83	4.08	4.32	376	440	406	462	476	449	465	499	ADAM22	ADAM metallopeptidase domain 22 [Source:HGNC Symbol;Acc:HGNC:201]	-	-	-	-	GO:0005886//plasma membrane;GO:0016020//membrane;GO:0016021//integral component of membrane;GO:0030424//axon;GO:0042995//cell projection;GO:0098978//glutamatergic synapse;GO:0099061//integral component of postsynaptic density membrane	GO:0004222//metalloendopeptidase activity;GO:0005178//integrin binding;GO:0005515//protein binding;GO:0008237//metallopeptidase activity	GO:0006508//proteolysis;GO:0007155//cell adhesion;GO:0007162//negative regulation of cell adhesion;GO:0007417//central nervous system development;GO:0008344//adult locomotory behavior;GO:0014037//Schwann cell differentiation;GO:0022011//myelination in peripheral nervous system;GO:0042063//gliogenesis;GO:0099645//neurotransmitter receptor localization to postsynaptic specialization membrane
ENSG00000008282	34.98	28.88	30.63	28.65	26.04	18.25	23.34	26.97	1391	1406	1472	1281	1341	1002	1204	1442	SYPL1	synaptophysin like 1 [Source:HGNC Symbol;Acc:HGNC:11507]	-	-	-	-	GO:0005887//integral component of plasma membrane;GO:0008021//synaptic vesicle;GO:0016020//membrane;GO:0016021//integral component of membrane;GO:0030141//secretory granule;GO:0030285//integral component of synaptic vesicle membrane;GO:0030659//cytoplasmic vesicle membrane;GO:0030672//synaptic vesicle membrane;GO:0031410//cytoplasmic vesicle;GO:0042470//melanosome;GO:0070062//extracellular exosome	GO:0005515//protein binding;GO:0017075//syntaxin-1 binding	GO:0007268//chemical synaptic transmission
ENSG00000008283	0.85	1.01	0.85	0.89	0.71	1.18	0.68	0.99	41	55	53	51.27	55	74	45	57	CYB561	cytochrome b561 [Source:HGNC Symbol;Acc:HGNC:2571]	-	-	-	-	GO:0005765//lysosomal membrane;GO:0016020//membrane;GO:0016021//integral component of membrane;GO:0030658//transport vesicle membrane;GO:0031410//cytoplasmic vesicle	GO:0000293//ferric-chelate reductase activity;GO:0005515//protein binding;GO:0016491//oxidoreductase activity;GO:0046872//metal ion binding	GO:0022900//electron transport chain;GO:0055114//oxidation-reduction process
ENSG00000008294	27.66	29.88	29.9	28.61	29	29.69	28.74	28.76	3120	3805	3606	3310	3711	3882	3790	3966	SPAG9	sperm associated antigen 9 [Source:HGNC Symbol;Acc:HGNC:14524]	-	-	-	-	GO:0001669//acrosomal vesicle;GO:0005737//cytoplasm;GO:0005764//lysosome;GO:0005765//lysosomal membrane;GO:0005829//cytosol;GO:0016020//membrane;GO:0016021//integral component of membrane;GO:0031410//cytoplasmic vesicle;GO:0034451//centriolar satellite;GO:0048471//perinuclear region of cytoplasm;GO:0070062//extracellular exosome	GO:0005078//MAP-kinase scaffold activity;GO:0005515//protein binding;GO:0008432//JUN kinase binding;GO:0019894//kinesin binding;GO:0030159//receptor signaling complex scaffold activity;GO:0042802//identical protein binding	GO:0000187//activation of MAPK activity;GO:0001933//negative regulation of protein phosphorylation;GO:0007257//activation of JUN kinase activity;GO:0016192//vesicle-mediated transport;GO:0030335//positive regulation of cell migration;GO:0032418//lysosome localization;GO:0042147//retrograde transport, endosome to Golgi;GO:0043410//positive regulation of MAPK cascade;GO:0045665//negative regulation…
ENSG00000008300	2.4	3.44	3.18	3.7	4	3.6	3.62	3.64	560	981	885	950	1193	1144	1084	1120	CELSR3	cadherin EGF LAG seven-pass G-type receptor 3 [Source:HGNC Symbol;Acc:HGNC:3230]	-	-	-	-	GO:0005886//plasma membrane;GO:0016020//membrane;GO:0016021//integral component of membrane	GO:0004888//transmembrane signaling receptor activity;GO:0004930//G protein-coupled receptor activity;GO:0005509//calcium ion binding;GO:0005515//protein binding	GO:0007155//cell adhesion;GO:0007156//homophilic cell adhesion via plasma membrane adhesion molecules;GO:0007165//signal transduction;GO:0007166//cell surface receptor signaling pathway;GO:0007186//G protein-coupled receptor signaling pathway;GO:0007275//multicellular organism development;GO:0060071//Wnt signaling pathway, planar cell polarity pathway;GO:0098609//cell-cell adhesion
ENSG00000008311	12.33	8.69	8.52	9.54	7.92	7.35	8.35	8.59	1219	1070	1039	973	966	1010	1032	1085	AASS	aminoadipate-semialdehyde synthase [Source:HGNC Symbol;Acc:HGNC:17366]	Metabolism;Metabolism	Global and overview maps;Amino acid metabolism	ko01100//Metabolic pathways;ko00310//Lysine degradation	K14157;K14157	GO:0005634//nucleus;GO:0005737//cytoplasm;GO:0005739//mitochondrion;GO:0005759//mitochondrial matrix;GO:0005829//cytosol;GO:0043231//intracellular membrane-bounded organelle	GO:0003714//transcription corepressor activity;GO:0003824//catalytic activity;GO:0004753//saccharopine dehydrogenase activity;GO:0004754//saccharopine dehydrogenase (NAD+, L-lysine-forming) activity;GO:0016491//oxidoreductase activity;GO:0042393//histone binding;GO:0047130//saccharopine dehydrogenase (NADP+, L-lysine-forming) activity;GO:0047131//saccharopine dehydrogenase (NAD+, L-glutamate-form…	GO:0000122//negative regulation of transcription by RNA polymerase II;GO:0006554//lysine catabolic process;GO:0008152//metabolic process;GO:0019477//L-lysine catabolic process;GO:0019878//lysine biosynthetic process via aminoadipic acid;GO:0031061//negative regulation of histone methylation;GO:0033512//L-lysine catabolic process to acetyl-CoA via saccharopine;GO:0055114//oxidation-reduction proce…
ENSG00000008323	3.81	5.98	5.56	6.03	6.51	5.96	5.83	5.3	182	362	332	330	408	426	383	340	PLEKHG6	pleckstrin homology and RhoGEF domain containing G6 [Source:HGNC Symbol;Acc:HGNC:25562]	-	-	-	-	GO:0000922//spindle pole;GO:0005737//cytoplasm;GO:0005813//centrosome;GO:0005819//spindle;GO:0005856//cytoskeleton;GO:0005902//microvillus;GO:0030054//cell junction;GO:0032154//cleavage furrow;GO:0042995//cell projection	GO:0005085//guanyl-nucleotide exchange factor activity;GO:0005096//GTPase activator activity;GO:0005515//protein binding	GO:0043547//positive regulation of GTPase activity;GO:0050790//regulation of catalytic activity
ENSG00000008324	10.59	11.38	13.44	12.98	10.46	7.63	10.38	11.79	217	285	330	292	273.57	213	273	319	SS18L2	SS18 like 2 [Source:HGNC Symbol;Acc:HGNC:15593]	-	-	-	-	GO:0005634//nucleus	GO:0003713//transcription coactivator activity;GO:0005515//protein binding	GO:0045893//positive regulation of transcription, DNA-templated;GO:0045944//positive regulation of transcription by RNA polymerase II;GO:0050775//positive regulation of dendrite morphogenesis
ENSG00000008382	3.74	5.31	5.53	5.2	5.58	5.7	6.04	6.22	84	178	177	165	175	200	208	207	MPND	MPN domain containing [Source:HGNC Symbol;Acc:HGNC:25934]	-	-	-	-	-	GO:0003713//transcription coactivator activity;GO:0004843//thiol-dependent ubiquitin-specific protease activity;GO:0005515//protein binding;GO:0008233//peptidase activity;GO:0008237//metallopeptidase activity;GO:0016787//hydrolase activity;GO:0042393//histone binding;GO:0046872//metal ion binding;GO:0070122//isopeptidase activity	GO:0006338//chromatin remodeling;GO:0006508//proteolysis;GO:0018215//protein phosphopantetheinylation;GO:0045944//positive regulation of transcription by RNA polymerase II
ENSG00000008394	204.08	172.29	175.94	157.6	129.75	148.27	148.47	141.54	3542	3555	3372	2814	2835	3483	3260	3095	MGST1	microsomal glutathione S-transferase 1 [Source:HGNC Symbol;Acc:HGNC:7061]	Metabolism;Human Diseases;Human Diseases;Human Diseases;Human Diseases;Metabolism;Metabolism;Human Diseases;Metabolism;Metabolism	Global and overview maps;Cancers;Cancers;Cardiovascular diseases;Cancers;Xenobiotics biodegradation and metabolism;Xenobiotics biodegradation and metabolism;Drug resistance;Xenobiotics biodegradation and metabolism;Metabolism of other amino acids	ko01100//Metabolic pathways;ko05200//Pathways in cancer;ko05225//Hepatocellular carcinoma;ko05418//Fluid shear stress and atherosclerosis;ko05204//Chemical carcinogenesis;ko00983//Drug metabolism - other enzymes;ko00980//Metabolism of xenobiotics by cytochrome P450;ko01524//Platinum drug resistance;ko00982//Drug metabolism - cytochrome P450;ko00480//Glutathione metabolism	K00799;K00799;K00799;K00799;K00799;K00799;K00799;K00799;K00799;K00799	GO:0005634//nucleus;GO:0005739//mitochondrion;GO:0005741//mitochondrial outer membrane;GO:0005778//peroxisomal membrane;GO:0005783//endoplasmic reticulum;GO:0005789//endoplasmic reticulum membrane;GO:0005886//plasma membrane;GO:0016020//membrane;GO:0016021//integral component of membrane;GO:0035577//azurophil granule membrane;GO:0043231//intracellular membrane-bounded organelle;GO:0045177//apical…	GO:0004364//glutathione transferase activity;GO:0004602//glutathione peroxidase activity;GO:0005515//protein binding;GO:0016740//transferase activity;GO:0042802//identical protein binding;GO:0043295//glutathione binding	GO:0006805//xenobiotic metabolic process;GO:0010243//response to organonitrogen compound;GO:0032496//response to lipopolysaccharide;GO:0033327//Leydig cell differentiation;GO:0042493//response to drug;GO:0043312//neutrophil degranulation;GO:0055114//oxidation-reduction process;GO:0071449//cellular response to lipid hydroperoxide;GO:0098869//cellular oxidant detoxification;GO:1901687//glutathione …
ENSG00000008405	11.11	11.05	10.57	11.16	9.78	8.7	10.08	10.66	627	760	700	692	677	671	698	760	CRY1	cryptochrome circadian regulator 1 [Source:HGNC Symbol;Acc:HGNC:2384]	Organismal Systems	Environmental adaptation	ko04710//Circadian rhythm	K02295	GO:0005634//nucleus;GO:0005737//cytoplasm;GO:0005739//mitochondrion	GO:0000166//nucleotide binding;GO:0003677//DNA binding;GO:0003690//double-stranded DNA binding;GO:0005515//protein binding;GO:0008134//transcription factor binding;GO:0009881//photoreceptor activity;GO:0009882//blue light photoreceptor activity;GO:0016829//lyase activity;GO:0019900//kinase binding;GO:0019901//protein kinase binding;GO:0019902//phosphatase binding;GO:0035257//nuclear hormone recep…	GO:0000122//negative regulation of transcription by RNA polymerase II;GO:0006094//gluconeogenesis;GO:0006975//DNA damage induced protein phosphorylation;GO:0007623//circadian rhythm;GO:0009416//response to light stimulus;GO:0009785//blue light signaling pathway;GO:0014823//response to activity;GO:0018298//protein-chromophore linkage;GO:0019915//lipid storage;GO:0031397//negative regulation of pro…
ENSG00000008438	0	0	0	0	0	0	0	0	0	0	0	0	0	0	0	0	PGLYRP1	peptidoglycan recognition protein 1 [Source:HGNC Symbol;Acc:HGNC:8904]	-	-	-	-	GO:0005576//extracellular region;GO:0035580//specific granule lumen;GO:0070062//extracellular exosome;GO:0097013//phagocytic vesicle lumen;GO:1904724//tertiary granule lumen	GO:0008270//zinc ion binding;GO:0008745//N-acetylmuramoyl-L-alanine amidase activity;GO:0016019//peptidoglycan receptor activity;GO:0042834//peptidoglycan binding	GO:0002376//immune system process;GO:0009253//peptidoglycan catabolic process;GO:0016045//detection of bacterium;GO:0019730//antimicrobial humoral response;GO:0031640//killing of cells of other organism;GO:0042742//defense response to bacterium;GO:0043312//neutrophil degranulation;GO:0045087//innate immune response;GO:0050830//defense response to Gram-positive bacterium;GO:0061844//antimicrobial …
ENSG00000008441	10.06	12.4	11.74	12.2	13.1	14.16	11.85	11.22	608	1053	976	954	993	1187	1007	972	NFIX	nuclear factor I X [Source:HGNC Symbol;Acc:HGNC:7788]	-	-	-	-	GO:0000785//chromatin;GO:0005634//nucleus;GO:0005654//nucleoplasm	GO:0000978//RNA polymerase II proximal promoter sequence-specific DNA binding;GO:0000981//DNA-binding transcription factor activity, RNA polymerase II-specific;GO:0003677//DNA binding;GO:0003700//DNA-binding transcription factor activity;GO:0005515//protein binding;GO:1990837//sequence-specific double-stranded DNA binding	GO:0000122//negative regulation of transcription by RNA polymerase II;GO:0006260//DNA replication;GO:0006355//regulation of transcription, DNA-templated;GO:0006357//regulation of transcription by RNA polymerase II;GO:0006366//transcription by RNA polymerase II;GO:0045944//positive regulation of transcription by RNA polymerase II
ENSG00000008513	16.78	13.76	12.62	12.52	17.71	19.17	16.86	14.78	1097	1453	1323	1310	1704	1774	1665	1645	ST3GAL1	ST3 beta-galactoside alpha-2,3-sialyltransferase 1 [Source:HGNC Symbol;Acc:HGNC:10862]	Metabolism;Metabolism;Metabolism;Metabolism;Metabolism	Global and overview maps;Glycan biosynthesis and metabolism;Glycan biosynthesis and metabolism;Glycan biosynthesis and metabolism;Glycan biosynthesis and metabolism	ko01100//Metabolic pathways;ko00512//Mucin type O-glycan biosynthesis;ko00604//Glycosphingolipid biosynthesis - ganglio series;ko00603//Glycosphingolipid biosynthesis - globo and isoglobo series;ko00533//Glycosaminoglycan biosynthesis - keratan sulfate	K00780;K00780;K00780;K00780;K00780	GO:0000139//Golgi membrane;GO:0005576//extracellular region;GO:0005794//Golgi apparatus;GO:0016020//membrane;GO:0016021//integral component of membrane;GO:0032580//Golgi cisterna membrane;GO:0032588//trans-Golgi network membrane;GO:0070062//extracellular exosome;GO:1990675//Golgi medial cisterna membrane;GO:1990676//Golgi trans cisterna membrane	GO:0003836//beta-galactoside (CMP) alpha-2,3-sialyltransferase activity;GO:0008373//sialyltransferase activity;GO:0016740//transferase activity;GO:0016757//transferase activity, transferring glycosyl groups	GO:0002319//memory B cell differentiation;GO:0006054//N-acetylneuraminate metabolic process;GO:0006464//cellular protein modification process;GO:0006468//protein phosphorylation;GO:0006486//protein glycosylation;GO:0006487//protein N-linked glycosylation;GO:0010706//ganglioside biosynthetic process via lactosylceramide;GO:0016266//O-glycan processing;GO:0018146//keratan sulfate biosynthetic proce…
ENSG00000008516	0.01	0.08	0.03	0.01	0.04	0.02	0.04	0.03	1	7	3	1	4	2	4	3	MMP25	matrix metallopeptidase 25 [Source:HGNC Symbol;Acc:HGNC:14246]	Organismal Systems	Endocrine system	ko04928//Parathyroid hormone synthesis, secretion and action	K08003	GO:0005576//extracellular region;GO:0005886//plasma membrane;GO:0016020//membrane;GO:0016021//integral component of membrane;GO:0031012//extracellular matrix;GO:0031225//anchored component of membrane;GO:0035579//specific granule membrane	GO:0004222//metalloendopeptidase activity;GO:0005515//protein binding;GO:0008233//peptidase activity;GO:0008237//metallopeptidase activity;GO:0008270//zinc ion binding;GO:0016787//hydrolase activity;GO:0046872//metal ion binding	GO:0006508//proteolysis;GO:0006954//inflammatory response;GO:0030198//extracellular matrix organization;GO:0030574//collagen catabolic process;GO:0043312//neutrophil degranulation;GO:0060022//hard palate development
ENSG00000008517	52.77	84.88	83.81	80.86	84.08	75.44	80.03	78.49	891	1768	1731	1517	1798	1683	1729	1743	IL32	interleukin 32 [Source:HGNC Symbol;Acc:HGNC:16830]	Environmental Information Processing	Signaling molecules and interaction	ko04060//Cytokine-cytokine receptor interaction	K22632	GO:0005576//extracellular region;GO:0005615//extracellular space;GO:0005829//cytosol;GO:0016020//membrane	GO:0005125//cytokine activity;GO:0005515//protein binding	GO:0006952//defense response;GO:0006955//immune response;GO:0007155//cell adhesion;GO:0010628//positive regulation of gene expression;GO:0019221//cytokine-mediated signaling pathway;GO:0034346//positive regulation of type III interferon production;GO:1903901//negative regulation of viral life cycle;GO:1905636//positive regulation of RNA polymerase II regulatory region sequence-specific DNA binding
ENSG00000008710	43.49	85.86	90.83	97.08	99.24	80.53	84.83	90.24	4027	9486.56	9204.99	9573	11022	10182.86	9870	10294.88	PKD1	polycystin 1, transient receptor potential channel interacting [Source:HGNC Symbol;Acc:HGNC:9008]	-	-	-	-	GO:0000139//Golgi membrane;GO:0002133//polycystin complex;GO:0005634//nucleus;GO:0005737//cytoplasm;GO:0005783//endoplasmic reticulum;GO:0005794//Golgi apparatus;GO:0005886//plasma membrane;GO:0005887//integral component of plasma membrane;GO:0005929//cilium;GO:0009986//cell surface;GO:0016020//membrane;GO:0016021//integral component of membrane;GO:0016323//basolateral plasma membrane;GO:0016328/…	GO:0005261//cation channel activity;GO:0005262//calcium channel activity;GO:0005515//protein binding;GO:0019901//protein kinase binding;GO:0019904//protein domain specific binding;GO:0030246//carbohydrate binding;GO:0042813//Wnt-activated receptor activity;GO:0044325//ion channel binding	GO:0001502//cartilage condensation;GO:0001568//blood vessel development;GO:0001701//in utero embryonic development;GO:0001822//kidney development;GO:0001889//liver development;GO:0001892//embryonic placenta development;GO:0006611//protein export from nucleus;GO:0006807//nitrogen compound metabolic process;GO:0006816//calcium ion transport;GO:0007050//cell cycle arrest;GO:0007156//homophilic cell …
ENSG00000008735	1.24	2.2	2.21	2.29	1.64	1.7	2.01	1.99	138	300	294	281	233	258	288	292	MAPK8IP2	mitogen-activated protein kinase 8 interacting protein 2 [Source:HGNC Symbol;Acc:HGNC:6883]	Environmental Information Processing	Signal transduction	ko04010//MAPK signaling pathway	K04435	GO:0005737//cytoplasm;GO:0014069//postsynaptic density;GO:0032991//protein-containing complex;GO:0043025//neuronal cell body	GO:0001540//amyloid-beta binding;GO:0005078//MAP-kinase scaffold activity;GO:0005198//structural molecule activity;GO:0005515//protein binding;GO:0019894//kinesin binding;GO:0019901//protein kinase binding;GO:0044877//protein-containing complex binding	GO:0001662//behavioral fear response;GO:0007172//signal complex assembly;GO:0007254//JNK cascade;GO:0007617//mating behavior;GO:0010469//regulation of signaling receptor activity;GO:0032874//positive regulation of stress-activated MAPK cascade;GO:0035176//social behavior;GO:0046328//regulation of JNK cascade;GO:0046958//nonassociative learning;GO:0048813//dendrite morphogenesis;GO:0051966//regula…
ENSG00000008838	37.12	43.06	42.1	40.87	42.29	41.65	39.42	40.32	1739	2694	2486	2432	2875	2837	2636	2724	MED24	mediator complex subunit 24 [Source:HGNC Symbol;Acc:HGNC:22963]	Organismal Systems	Endocrine system	ko04919//Thyroid hormone signaling pathway	K15167	GO:0000151//ubiquitin ligase complex;GO:0005634//nucleus;GO:0005654//nucleoplasm;GO:0016592//mediator complex	GO:0003712//transcription coregulator activity;GO:0003713//transcription coactivator activity;GO:0004402//histone acetyltransferase activity;GO:0005515//protein binding;GO:0030374//nuclear receptor transcription coactivator activity;GO:0042809//vitamin D receptor binding;GO:0044877//protein-containing complex binding;GO:0046966//thyroid hormone receptor binding;GO:0061630//ubiquitin protein ligas…	GO:0006367//transcription initiation from RNA polymerase II promoter;GO:0016567//protein ubiquitination;GO:0016573//histone acetylation;GO:0045893//positive regulation of transcription, DNA-templated;GO:0060261//positive regulation of transcription initiation from RNA polymerase II promoter
ENSG00000008853	5.69	5.75	5.02	5.95	5.44	5.47	5.48	5.61	450	657	578	635	636	637	620	657	RHOBTB2	Rho related BTB domain containing 2 [Source:HGNC Symbol;Acc:HGNC:18756]	Genetic Information Processing	Folding, sorting and degradation	ko04120//Ubiquitin mediated proteolysis	K07868	GO:0005829//cytosol;GO:0005856//cytoskeleton;GO:0005886//plasma membrane;GO:0005938//cell cortex;GO:0031410//cytoplasmic vesicle;GO:0042995//cell projection;GO:0043231//intracellular membrane-bounded organelle	GO:0000166//nucleotide binding;GO:0003924//GTPase activity;GO:0005515//protein binding;GO:0005525//GTP binding;GO:0019901//protein kinase binding	GO:0007015//actin filament organization;GO:0007163//establishment or maintenance of cell polarity;GO:0007264//small GTPase mediated signal transduction;GO:0008360//regulation of cell shape;GO:0030865//cortical cytoskeleton organization;GO:0032956//regulation of actin cytoskeleton organization;GO:0043652//engulfment of apoptotic cell;GO:0051056//regulation of small GTPase mediated signal transduct…
ENSG00000008869	5.55	5.6	5.68	5.71	5.3	5.52	5.92	5.7	751	930	919	852	919	1022	1032	1019	HEATR5B	HEAT repeat containing 5B [Source:HGNC Symbol;Acc:HGNC:29273]	-	-	-	-	GO:0005829//cytosol;GO:0016020//membrane;GO:0030139//endocytic vesicle	GO:0005515//protein binding	GO:0006897//endocytosis;GO:0008104//protein localization;GO:0042147//retrograde transport, endosome to Golgi
ENSG00000008952	41.11	42.5	41.86	37	34.59	40.59	40.45	41.46	2444	2813	2792	2309	2272	2506	2611	2893	SEC62	SEC62 homolog, preprotein translocation factor [Source:HGNC Symbol;Acc:HGNC:11846]	Genetic Information Processing;Genetic Information Processing	Folding, sorting and degradation;Folding, sorting and degradation	ko04141//Protein processing in endoplasmic reticulum;ko03060//Protein export	K12275;K12275	GO:0005783//endoplasmic reticulum;GO:0005789//endoplasmic reticulum membrane;GO:0005791//rough endoplasmic reticulum;GO:0005829//cytosol;GO:0016020//membrane;GO:0016021//integral component of membrane;GO:0030176//integral component of endoplasmic reticulum membrane	GO:0038023//signaling receptor activity	GO:0006613//cotranslational protein targeting to membrane;GO:0006620//posttranslational protein targeting to endoplasmic reticulum membrane;GO:0015031//protein transport;GO:0031204//posttranslational protein targeting to membrane, translocation
ENSG00000008988	331.27	572.43	650.67	565.13	683.62	564.77	619.86	675.14	3413.23	7192	7962	6366	8939	7887	8157	9113	RPS20	ribosomal protein S20 [Source:HGNC Symbol;Acc:HGNC:10405]	Genetic Information Processing	Translation	ko03010//Ribosome	K02969	GO:0005654//nucleoplasm;GO:0005737//cytoplasm;GO:0005829//cytosol;GO:0005840//ribosome;GO:0015935//small ribosomal subunit;GO:0016020//membrane;GO:0022627//cytosolic small ribosomal subunit;GO:0070062//extracellular exosome	GO:0003723//RNA binding;GO:0003735//structural constituent of ribosome;GO:0005515//protein binding	GO:0000184//nuclear-transcribed mRNA catabolic process, nonsense-mediated decay;GO:0006412//translation;GO:0006413//translational initiation;GO:0006614//SRP-dependent cotranslational protein targeting to membrane;GO:0019083//viral transcription
ENSG00000009307	183.95	167.28	176.37	172.06	158.71	147.47	156.94	166.39	12906	14270	13911	12995	13831	13620	13832	15083	CSDE1	cold shock domain containing E1 [Source:HGNC Symbol;Acc:HGNC:29905]	-	-	-	-	GO:0000932//P-body;GO:0005737//cytoplasm;GO:0005794//Golgi apparatus;GO:0005829//cytosol;GO:0005886//plasma membrane;GO:0010494//cytoplasmic stress granule;GO:0070937//CRD-mediated mRNA stability complex	GO:0003676//nucleic acid binding;GO:0003723//RNA binding;GO:0005515//protein binding;GO:0035613//RNA stem-loop binding	GO:0006446//regulation of translational initiation;GO:0008584//male gonad development;GO:0034063//stress granule assembly;GO:0070966//nuclear-transcribed mRNA catabolic process, no-go decay;GO:0075522//IRES-dependent viral translational initiation
ENSG00000009335	20.6	21.12	20.23	21.45	19.46	16.84	17.44	19.01	2080	2598	2449	2381	2526	2324	2283	2542	UBE3C	ubiquitin protein ligase E3C [Source:HGNC Symbol;Acc:HGNC:16803]	Genetic Information Processing	Folding, sorting and degradation	ko04120//Ubiquitin mediated proteolysis	K10589	GO:0000502//proteasome complex;GO:0005634//nucleus	GO:0004842//ubiquitin-protein transferase activity;GO:0005515//protein binding;GO:0016740//transferase activity;GO:0061630//ubiquitin protein ligase activity	GO:0000209//protein polyubiquitination;GO:0006511//ubiquitin-dependent protein catabolic process;GO:0016567//protein ubiquitination
ENSG00000009413	13.21	9.86	9.77	10.21	6.95	6.68	7.71	8.05	2497	2342	2135	2125	1561	1770.16	1691	1836	REV3L	REV3 like, DNA directed polymerase zeta catalytic subunit [Source:HGNC Symbol;Acc:HGNC:9968]	Human Diseases;Genetic Information Processing	Drug resistance;Replication and repair	ko01524//Platinum drug resistance;ko03460//Fanconi anemia pathway	K02350;K02350	GO:0005634//nucleus;GO:0005654//nucleoplasm;GO:0005730//nucleolus;GO:0016035//zeta DNA polymerase complex	GO:0000166//nucleotide binding;GO:0003676//nucleic acid binding;GO:0003677//DNA binding;GO:0003887//DNA-directed DNA polymerase activity;GO:0005515//protein binding;GO:0016740//transferase activity;GO:0016779//nucleotidyltransferase activity;GO:0046872//metal ion binding;GO:0051536//iron-sulfur cluster binding;GO:0051539//4 iron, 4 sulfur cluster binding	GO:0000724//double-strand break repair via homologous recombination;GO:0006260//DNA replication;GO:0006261//DNA-dependent DNA replication;GO:0006281//DNA repair;GO:0006974//cellular response to DNA damage stimulus;GO:0019985//translesion synthesis;GO:0042276//error-prone translesion synthesis;GO:0090305//nucleic acid phosphodiester bond hydrolysis
ENSG00000009694	0	0.01	0	0	0.01	0	0.01	0	0	2	1	1	3	1	2	1	TENM1	teneurin transmembrane protein 1 [Source:HGNC Symbol;Acc:HGNC:8117]	-	-	-	-	GO:0005576//extracellular region;GO:0005634//nucleus;GO:0005737//cytoplasm;GO:0005783//endoplasmic reticulum;GO:0005794//Golgi apparatus;GO:0005856//cytoskeleton;GO:0005886//plasma membrane;GO:0005887//integral component of plasma membrane;GO:0016020//membrane;GO:0016021//integral component of membrane;GO:0016363//nuclear matrix;GO:0016607//nuclear speck;GO:0043005//neuron projection;GO:0048471//…	GO:0008201//heparin binding;GO:0042802//identical protein binding;GO:0042803//protein homodimerization activity;GO:0046982//protein heterodimerization activity;GO:0050839//cell adhesion molecule binding	GO:0006359//regulation of transcription by RNA polymerase III;GO:0006955//immune response;GO:0007157//heterophilic cell-cell adhesion via plasma membrane cell adhesion molecules;GO:0007165//signal transduction;GO:0007218//neuropeptide signaling pathway;GO:0007399//nervous system development;GO:0008285//negative regulation of cell proliferation;GO:0030838//positive regulation of actin filament pol…
ENSG00000009709	0	0	0	0	0	0	0	0	0	0	0	0	0	0	0	0	PAX7	paired box 7 [Source:HGNC Symbol;Acc:HGNC:8621]	-	-	-	-	GO:0000785//chromatin;GO:0005634//nucleus	GO:0000978//RNA polymerase II proximal promoter sequence-specific DNA binding;GO:0000981//DNA-binding transcription factor activity, RNA polymerase II-specific;GO:0003677//DNA binding;GO:0003700//DNA-binding transcription factor activity;GO:0005515//protein binding;GO:1990837//sequence-specific double-stranded DNA binding	GO:0006355//regulation of transcription, DNA-templated;GO:0006357//regulation of transcription by RNA polymerase II;GO:0007275//multicellular organism development;GO:0007517//muscle organ development;GO:0009653//anatomical structure morphogenesis;GO:0043066//negative regulation of apoptotic process;GO:0048856//anatomical structure development
ENSG00000009724	5.93	6.36	7.69	6.19	6.69	8.47	6.79	5.68	147	181	184	153	182	221	187	156	MASP2	mannan binding lectin serine peptidase 2 [Source:HGNC Symbol;Acc:HGNC:6902]	Human Diseases;Organismal Systems	Infectious diseases;Immune system	ko05150//Staphylococcus aureus infection;ko04610//Complement and coagulation cascades	K03993;K03993	GO:0005576//extracellular region;GO:0005615//extracellular space;GO:0070062//extracellular exosome	GO:0001855//complement component C4b binding;GO:0004252//serine-type endopeptidase activity;GO:0005509//calcium ion binding;GO:0005515//protein binding;GO:0008233//peptidase activity;GO:0008236//serine-type peptidase activity;GO:0016787//hydrolase activity;GO:0042802//identical protein binding;GO:0046872//metal ion binding;GO:0048306//calcium-dependent protein binding	GO:0001867//complement activation, lectin pathway;GO:0002376//immune system process;GO:0006508//proteolysis;GO:0006956//complement activation;GO:0006958//complement activation, classical pathway;GO:0045087//innate immune response
ENSG00000009765	0.01	0.08	0	0.15	0.11	0.08	0.01	0.04	1	2	0	10	4	4	2	8	IYD	iodotyrosine deiodinase [Source:HGNC Symbol;Acc:HGNC:21071]	Organismal Systems	Endocrine system	ko04918//Thyroid hormone synthesis	K17231	GO:0005654//nucleoplasm;GO:0005886//plasma membrane;GO:0005887//integral component of plasma membrane;GO:0016020//membrane;GO:0016021//integral component of membrane;GO:0030659//cytoplasmic vesicle membrane;GO:0031410//cytoplasmic vesicle	GO:0004447//iodide peroxidase activity;GO:0005515//protein binding;GO:0010181//FMN binding;GO:0016491//oxidoreductase activity	GO:0006570//tyrosine metabolic process;GO:0006590//thyroid hormone generation;GO:0042403//thyroid hormone metabolic process;GO:0055114//oxidation-reduction process;GO:0098869//cellular oxidant detoxification
ENSG00000009780	4.49	3.53	4.13	4.79	4.3	4.13	4.1	3.2	166	181	189	204	179	187	187	172	FAM76A	family with sequence similarity 76 member A [Source:HGNC Symbol;Acc:HGNC:28530]	-	-	-	-	GO:0005654//nucleoplasm	-	-
ENSG00000009790	0.06	0	0	0	0	0	0.02	0	1	0	0	0	0	0	1	0	TRAF3IP3	TRAF3 interacting protein 3 [Source:HGNC Symbol;Acc:HGNC:30766]	-	-	-	-	GO:0000139//Golgi membrane;GO:0005739//mitochondrion;GO:0005741//mitochondrial outer membrane;GO:0005764//lysosome;GO:0005765//lysosomal membrane;GO:0005794//Golgi apparatus;GO:0005886//plasma membrane;GO:0016020//membrane;GO:0016021//integral component of membrane	GO:0005515//protein binding	-
ENSG00000009830	4.29	7.51	7.3	4.77	4.83	5.09	4.72	4.58	307	422	424	420	437	448	430	413	POMT2	protein O-mannosyltransferase 2 [Source:HGNC Symbol;Acc:HGNC:19743]	Metabolism;Metabolism;Metabolism	Global and overview maps;Glycan biosynthesis and metabolism;Glycan biosynthesis and metabolism	ko01100//Metabolic pathways;ko00514//Other types of O-glycan biosynthesis;ko00515//Mannose type O-glycan biosyntheis	K00728;K00728;K00728	GO:0005654//nucleoplasm;GO:0005730//nucleolus;GO:0005783//endoplasmic reticulum;GO:0005789//endoplasmic reticulum membrane;GO:0005829//cytosol;GO:0016020//membrane;GO:0016021//integral component of membrane	GO:0000030//mannosyltransferase activity;GO:0004169//dolichyl-phosphate-mannose-protein mannosyltransferase activity;GO:0016740//transferase activity;GO:0016757//transferase activity, transferring glycosyl groups;GO:0046872//metal ion binding	GO:0006486//protein glycosylation;GO:0006493//protein O-linked glycosylation;GO:0035269//protein O-linked mannosylation;GO:0071712//ER-associated misfolded protein catabolic process;GO:0097502//mannosylation;GO:1904100//positive regulation of protein O-linked glycosylation
ENSG00000009844	61.89	52.74	54.03	54.14	46	49.23	48.11	45.83	2246	2392	2426	2182	2098	2217	2160	2247	VTA1	vesicle trafficking 1 [Source:HGNC Symbol;Acc:HGNC:20954]	Cellular Processes	Transport and catabolism	ko04144//Endocytosis	K12199	GO:0005654//nucleoplasm;GO:0005737//cytoplasm;GO:0005768//endosome;GO:0005771//multivesicular body;GO:0005829//cytosol;GO:0010008//endosome membrane;GO:0016020//membrane;GO:0043231//intracellular membrane-bounded organelle;GO:0070062//extracellular exosome	GO:0005515//protein binding;GO:0008022//protein C-terminus binding	GO:0015031//protein transport;GO:0016197//endosomal transport;GO:0016236//macroautophagy;GO:0019058//viral life cycle;GO:0032511//late endosome to vacuole transport via multivesicular body sorting pathway;GO:0036258//multivesicular body assembly;GO:0046755//viral budding;GO:0071985//multivesicular body sorting pathway;GO:1904903//ESCRT III complex disassembly
ENSG00000009950	40.35	58.41	55.01	62.45	59.78	62.97	59.57	53.91	1620	2819	2684	2779	2929	3315	2960	2941	MLXIPL	MLX interacting protein like [Source:HGNC Symbol;Acc:HGNC:12744]	Human Diseases;Human Diseases	Endocrine and metabolic diseases;Endocrine and metabolic diseases	ko04932//Non-alcoholic fatty liver disease (NAFLD);ko04931//Insulin resistance	K09113;K09113	GO:0000785//chromatin;GO:0005634//nucleus;GO:0005654//nucleoplasm;GO:0005667//transcription factor complex;GO:0005737//cytoplasm;GO:0005829//cytosol	GO:0000978//RNA polymerase II proximal promoter sequence-specific DNA binding;GO:0000981//DNA-binding transcription factor activity, RNA polymerase II-specific;GO:0001227//DNA-binding transcription repressor activity, RNA polymerase II-specific;GO:0003677//DNA binding;GO:0003700//DNA-binding transcription factor activity;GO:0008134//transcription factor binding;GO:0035538//carbohydrate response e…	GO:0000122//negative regulation of transcription by RNA polymerase II;GO:0006355//regulation of transcription, DNA-templated;GO:0006357//regulation of transcription by RNA polymerase II;GO:0008284//positive regulation of cell proliferation;GO:0009653//anatomical structure morphogenesis;GO:0010255//glucose mediated signaling pathway;GO:0033137//negative regulation of peptidyl-serine phosphorylatio…
ENSG00000009954	36.31	40.22	40.78	41.25	34.9	34.93	35.12	36.43	4186	5617	5558	5194	5082	5431	5135	5487	BAZ1B	bromodomain adjacent to zinc finger domain 1B [Source:HGNC Symbol;Acc:HGNC:961]	-	-	-	-	GO:0000793//condensed chromosome;GO:0005634//nucleus;GO:0005654//nucleoplasm;GO:0005721//pericentric heterochromatin;GO:0016604//nuclear body;GO:0043596//nuclear replication fork	GO:0000166//nucleotide binding;GO:0004713//protein tyrosine kinase activity;GO:0004715//non-membrane spanning protein tyrosine kinase activity;GO:0005515//protein binding;GO:0005524//ATP binding;GO:0008270//zinc ion binding;GO:0016301//kinase activity;GO:0016740//transferase activity;GO:0035173//histone kinase activity;GO:0042393//histone binding;GO:0046872//metal ion binding	GO:0006333//chromatin assembly or disassembly;GO:0006338//chromatin remodeling;GO:0006357//regulation of transcription by RNA polymerase II;GO:0006974//cellular response to DNA damage stimulus;GO:0016310//phosphorylation;GO:0016572//histone phosphorylation;GO:0018108//peptidyl-tyrosine phosphorylation;GO:0045815//positive regulation of gene expression, epigenetic
ENSG00000010017	23.47	19.29	18.87	18.07	16.39	16.35	17.54	16.45	1550	1562.2	1490.35	1314.19	1386	1475.19	1490.19	1435.39	RANBP9	RAN binding protein 9 [Source:HGNC Symbol;Acc:HGNC:13727]	-	-	-	-	GO:0000151//ubiquitin ligase complex;GO:0005634//nucleus;GO:0005654//nucleoplasm;GO:0005737//cytoplasm;GO:0005829//cytosol;GO:0005875//microtubule associated complex;GO:0005886//plasma membrane;GO:0016020//membrane;GO:0016604//nuclear body	GO:0005515//protein binding;GO:0019899//enzyme binding;GO:0031267//small GTPase binding	GO:0000165//MAPK cascade;GO:0007010//cytoskeleton organization;GO:0007020//microtubule nucleation;GO:0007166//cell surface receptor signaling pathway;GO:0007411//axon guidance;GO:0065003//protein-containing complex assembly;GO:0070373//negative regulation of ERK1 and ERK2 cascade;GO:1902993//positive regulation of amyloid precursor protein catabolic process
ENSG00000010030	0.04	0	0	0	0.11	0	0	0	1	0	0	0	4	0	0	0	ETV7	ETS variant transcription factor 7 [Source:HGNC Symbol;Acc:HGNC:18160]	Human Diseases	Cancers	ko05202//Transcriptional misregulation in cancers	K03211	GO:0000785//chromatin;GO:0005634//nucleus;GO:0005654//nucleoplasm;GO:0042025//host cell nucleus	GO:0000977//RNA polymerase II regulatory region sequence-specific DNA binding;GO:0000981//DNA-binding transcription factor activity, RNA polymerase II-specific;GO:0001227//DNA-binding transcription repressor activity, RNA polymerase II-specific;GO:0003677//DNA binding;GO:0003700//DNA-binding transcription factor activity;GO:0005515//protein binding;GO:0043565//sequence-specific DNA binding;GO:199…	GO:0000122//negative regulation of transcription by RNA polymerase II;GO:0006355//regulation of transcription, DNA-templated;GO:0006357//regulation of transcription by RNA polymerase II;GO:0006366//transcription by RNA polymerase II;GO:0009887//animal organ morphogenesis;GO:0030154//cell differentiation
ENSG00000010072	7.67	4.8	5.08	5.32	3.65	3.85	3.69	4.37	421.45	375.01	389.6	364.63	297.37	332.96	291.02	361.12	SPRTN	SprT-like N-terminal domain [Source:HGNC Symbol;Acc:HGNC:25356]	-	-	-	-	GO:0000785//chromatin;GO:0005634//nucleus;GO:0005654//nucleoplasm;GO:0005694//chromosome;GO:0016607//nuclear speck	GO:0003677//DNA binding;GO:0003690//double-stranded DNA binding;GO:0003697//single-stranded DNA binding;GO:0004222//metalloendopeptidase activity;GO:0005515//protein binding;GO:0008233//peptidase activity;GO:0008237//metallopeptidase activity;GO:0016787//hydrolase activity;GO:0031593//polyubiquitin modification-dependent protein binding;GO:0043130//ubiquitin binding;GO:0046872//metal ion binding;…	GO:0006281//DNA repair;GO:0006508//proteolysis;GO:0006974//cellular response to DNA damage stimulus;GO:0009411//response to UV;GO:0016540//protein autoprocessing;GO:0019985//translesion synthesis;GO:0031398//positive regulation of protein ubiquitination;GO:0070987//error-free translesion synthesis
ENSG00000010165	7.91	11.64	11.76	12.25	12.31	8.71	9.99	10.57	519	934	918	881	1033	778	844	912	EEF1AKNMT	eEF1A lysine and N-terminal methyltransferase [Source:HGNC Symbol;Acc:HGNC:24248]	-	-	-	-	-	GO:0003824//catalytic activity;GO:0005515//protein binding;GO:0008168//methyltransferase activity;GO:0016740//transferase activity	GO:0008152//metabolic process;GO:0032259//methylation
ENSG00000010219	4.11	3.34	4.03	3.22	4.21	3.81	3.97	3.3	136	157	180	133	191	162	194	162.2	DYRK4	dual specificity tyrosine phosphorylation regulated kinase 4 [Source:HGNC Symbol;Acc:HGNC:3095]	-	-	-	-	GO:0005634//nucleus;GO:0005737//cytoplasm;GO:0005856//cytoskeleton;GO:0043231//intracellular membrane-bounded organelle	GO:0000166//nucleotide binding;GO:0004672//protein kinase activity;GO:0004674//protein serine/threonine kinase activity;GO:0004712//protein serine/threonine/tyrosine kinase activity;GO:0004713//protein tyrosine kinase activity;GO:0005515//protein binding;GO:0005524//ATP binding;GO:0016301//kinase activity;GO:0016740//transferase activity;GO:0046872//metal ion binding	GO:0006468//protein phosphorylation;GO:0016310//phosphorylation;GO:0018105//peptidyl-serine phosphorylation;GO:0018107//peptidyl-threonine phosphorylation;GO:0018108//peptidyl-tyrosine phosphorylation
ENSG00000010244	95.77	87.64	83.82	85.11	77.82	81.9	77.15	78.87	4818	5416	5032	4752	4794	5246.12	4795	5121	ZNF207	zinc finger protein 207 [Source:HGNC Symbol;Acc:HGNC:12998]	-	-	-	-	GO:0000775//chromosome, centromeric region;GO:0000776//kinetochore;GO:0000777//condensed chromosome kinetochore;GO:0005634//nucleus;GO:0005654//nucleoplasm;GO:0005694//chromosome;GO:0005730//nucleolus;GO:0005737//cytoplasm;GO:0005819//spindle;GO:0005856//cytoskeleton;GO:0005874//microtubule;GO:1990047//spindle matrix	GO:0003677//DNA binding;GO:0003723//RNA binding;GO:0005515//protein binding;GO:0008017//microtubule binding;GO:0008201//heparin binding;GO:0046872//metal ion binding	GO:0000070//mitotic sister chromatid segregation;GO:0001578//microtubule bundle formation;GO:0007049//cell cycle;GO:0007059//chromosome segregation;GO:0007094//mitotic spindle assembly checkpoint;GO:0008608//attachment of spindle microtubules to kinetochore;GO:0046785//microtubule polymerization;GO:0050821//protein stabilization;GO:0051301//cell division;GO:0051983//regulation of chromosome segre…
ENSG00000010256	81.63	142.85	137.7	143.16	165.21	145.09	153.01	156.31	2538	5429	5114	4883	6566	6144	6112	6398	UQCRC1	ubiquinol-cytochrome c reductase core protein 1 [Source:HGNC Symbol;Acc:HGNC:12585]	Metabolism;Human Diseases;Human Diseases;Organismal Systems;Human Diseases;Human Diseases;Metabolism;Organismal Systems	Global and overview maps;Neurodegenerative diseases;Neurodegenerative diseases;Environmental adaptation;Endocrine and metabolic diseases;Neurodegenerative diseases;Energy metabolism;Circulatory system	ko01100//Metabolic pathways;ko05010//Alzheimer disease;ko05016//Huntington disease;ko04714//Thermogenesis;ko04932//Non-alcoholic fatty liver disease (NAFLD);ko05012//Parkinson disease;ko00190//Oxidative phosphorylation;ko04260//Cardiac muscle contraction	K00414;K00414;K00414;K00414;K00414;K00414;K00414;K00414	GO:0005739//mitochondrion;GO:0005743//mitochondrial inner membrane;GO:0005746//mitochondrial respiratory chain;GO:0005750//mitochondrial respiratory chain complex III;GO:0016020//membrane;GO:0070469//respiratory chain	GO:0003824//catalytic activity;GO:0005515//protein binding;GO:0008121//ubiquinol-cytochrome-c reductase activity;GO:0031625//ubiquitin protein ligase binding;GO:0044877//protein-containing complex binding;GO:0046872//metal ion binding	GO:0006119//oxidative phosphorylation;GO:0006122//mitochondrial electron transport, ubiquinol to cytochrome c;GO:0009060//aerobic respiration;GO:0014823//response to activity;GO:0043279//response to alkaloid;GO:0055114//oxidation-reduction process
ENSG00000010270	17.2	17.83	17.81	17.11	16.93	14.04	17.1	16.52	507	636	612	540	611	541	632	638	STARD3NL	STARD3 N-terminal like [Source:HGNC Symbol;Acc:HGNC:19169]	-	-	-	-	GO:0005765//lysosomal membrane;GO:0005768//endosome;GO:0005789//endoplasmic reticulum membrane;GO:0005829//cytosol;GO:0010008//endosome membrane;GO:0016020//membrane;GO:0016021//integral component of membrane;GO:0031902//late endosome membrane;GO:0043231//intracellular membrane-bounded organelle;GO:0044232//organelle membrane contact site	GO:0005515//protein binding;GO:0015485//cholesterol binding;GO:0042803//protein homodimerization activity	GO:0006700//C21-steroid hormone biosynthetic process;GO:0099044//vesicle tethering to endoplasmic reticulum
ENSG00000010278	6.23	5.53	7.28	5.26	7.8	7	7.8	7.45	135	153	195	136	217	211	219	214	CD9	CD9 molecule [Source:HGNC Symbol;Acc:HGNC:1709]	Organismal Systems	Immune system	ko04640//Hematopoietic cell lineage	K06460	GO:0005576//extracellular region;GO:0005615//extracellular space;GO:0005886//plasma membrane;GO:0005887//integral component of plasma membrane;GO:0005925//focal adhesion;GO:0009897//external side of plasma membrane;GO:0009986//cell surface;GO:0016020//membrane;GO:0016021//integral component of membrane;GO:0016324//apical plasma membrane;GO:0030666//endocytic vesicle membrane;GO:0030669//clathrin-…	GO:0005178//integrin binding;GO:0005515//protein binding	GO:0002576//platelet degranulation;GO:0007155//cell adhesion;GO:0007338//single fertilization;GO:0007342//fusion of sperm to egg plasma membrane involved in single fertilization;GO:0007420//brain development;GO:0008285//negative regulation of cell proliferation;GO:0008347//glial cell migration;GO:0009414//response to water deprivation;GO:0014003//oligodendrocyte development;GO:0014905//myoblast f…
ENSG00000010282	0	0	0	0	0	0	0.02	0.02	0	0	0	0	0	0	1	1	HHATL	hedgehog acyltransferase like [Source:HGNC Symbol;Acc:HGNC:13242]	-	-	-	-	GO:0005783//endoplasmic reticulum;GO:0005789//endoplasmic reticulum membrane;GO:0016020//membrane;GO:0016021//integral component of membrane;GO:0048471//perinuclear region of cytoplasm	GO:0005515//protein binding;GO:0016746//transferase activity, transferring acyl groups	GO:0060262//negative regulation of N-terminal protein palmitoylation
ENSG00000010292	71.97	61.79	60.26	63.9	65.93	62.02	57.33	60.48	5324	6541	6396	6195	7520	7242	6772	7220	NCAPD2	non-SMC condensin I complex subunit D2 [Source:HGNC Symbol;Acc:HGNC:24305]	-	-	-	-	GO:0000228//nuclear chromosome;GO:0000779//condensed chromosome, centromeric region;GO:0000793//condensed chromosome;GO:0000796//condensin complex;GO:0005634//nucleus;GO:0005654//nucleoplasm;GO:0005694//chromosome;GO:0005737//cytoplasm;GO:0005829//cytosol;GO:0016020//membrane	GO:0003682//chromatin binding;GO:0005515//protein binding;GO:0042393//histone binding	GO:0000278//mitotic cell cycle;GO:0007049//cell cycle;GO:0007076//mitotic chromosome condensation;GO:0010032//meiotic chromosome condensation;GO:0030261//chromosome condensation;GO:0051301//cell division;GO:0051304//chromosome separation
ENSG00000010295	3.7	6.87	7.41	6.97	6.67	5.8	6.03	6.15	194	445	467	405	449	417	409	428	IFFO1	intermediate filament family orphan 1 [Source:HGNC Symbol;Acc:HGNC:24970]	-	-	-	-	GO:0005654//nucleoplasm;GO:0005882//intermediate filament;GO:0016363//nuclear matrix;GO:0035861//site of double-strand break	GO:0005515//protein binding	GO:0006303//double-strand break repair via nonhomologous end joining;GO:1990166//protein localization to site of double-strand break;GO:1990683//DNA double-strand break attachment to nuclear envelope
ENSG00000010310	0.05	0	0.03	0.09	0.16	0.08	0.17	0.04	3	0	2	4	4	7	4	3	GIPR	gastric inhibitory polypeptide receptor [Source:HGNC Symbol;Acc:HGNC:4271]	Environmental Information Processing;Environmental Information Processing	Signaling molecules and interaction;Signal transduction	ko04080//Neuroactive ligand-receptor interaction;ko04024//cAMP signaling pathway	K04580;K04580	GO:0005886//plasma membrane;GO:0016020//membrane;GO:0016021//integral component of membrane	GO:0004888//transmembrane signaling receptor activity;GO:0004930//G protein-coupled receptor activity;GO:0005515//protein binding;GO:0008528//G protein-coupled peptide receptor activity;GO:0016519//gastric inhibitory peptide receptor activity;GO:0017046//peptide hormone binding	GO:0002029//desensitization of G protein-coupled receptor signaling pathway;GO:0006091//generation of precursor metabolites and energy;GO:0007165//signal transduction;GO:0007166//cell surface receptor signaling pathway;GO:0007186//G protein-coupled receptor signaling pathway;GO:0007188//adenylate cyclase-modulating G protein-coupled receptor signaling pathway;GO:0007190//activation of adenylate c…
ENSG00000010318	2.11	1.29	1.68	1.84	1.5	1.71	2.18	1.46	83	63	69	64	67	81	101	76	PHF7	PHD finger protein 7 [Source:HGNC Symbol;Acc:HGNC:18458]	-	-	-	-	GO:0005634//nucleus;GO:0005654//nucleoplasm;GO:0005794//Golgi apparatus;GO:0005829//cytosol;GO:0005886//plasma membrane;GO:0016607//nuclear speck	GO:0005515//protein binding;GO:0046872//metal ion binding	-
ENSG00000010319	2.65	4.13	4.01	4.06	5.43	5.18	5.03	4.72	213	424	410	375	592	553	501	558	SEMA3G	semaphorin 3G [Source:HGNC Symbol;Acc:HGNC:30400]	Organismal Systems	Development	ko04360//Axon guidance	K06840	GO:0005576//extracellular region;GO:0005615//extracellular space;GO:0005887//integral component of plasma membrane;GO:0070062//extracellular exosome	GO:0005102//signaling receptor binding;GO:0005515//protein binding;GO:0030215//semaphorin receptor binding;GO:0045499//chemorepellent activity	GO:0001755//neural crest cell migration;GO:0007411//axon guidance;GO:0030335//positive regulation of cell migration;GO:0030517//negative regulation of axon extension;GO:0048843//negative regulation of axon extension involved in axon guidance;GO:0050919//negative chemotaxis;GO:0071526//semaphorin-plexin signaling pathway
ENSG00000010322	9.41	13.96	13.42	13.75	14.29	13.8	13.8	13.92	783	1375	1290	1213	1472	1539	1402	1468	NISCH	nischarin [Source:HGNC Symbol;Acc:HGNC:18006]	-	-	-	-	GO:0005654//nucleoplasm;GO:0005737//cytoplasm;GO:0005768//endosome;GO:0005769//early endosome;GO:0005829//cytosol;GO:0005886//plasma membrane;GO:0015630//microtubule cytoskeleton;GO:0016020//membrane;GO:0043231//intracellular membrane-bounded organelle;GO:0045171//intercellular bridge;GO:0055037//recycling endosome	GO:0005178//integrin binding;GO:0005515//protein binding;GO:0019901//protein kinase binding;GO:0035091//phosphatidylinositol binding;GO:0042802//identical protein binding	GO:0006006//glucose metabolic process;GO:0006915//apoptotic process;GO:0008217//regulation of blood pressure;GO:0016601//Rac protein signal transduction;GO:0030036//actin cytoskeleton organization;GO:0030336//negative regulation of cell migration;GO:0032228//regulation of synaptic transmission, GABAergic;GO:0048243//norepinephrine secretion
ENSG00000010327	0.08	0.06	0.1	0.09	0.11	0.2	0.09	0.11	13	12	18	16	21	24	18	23	STAB1	stabilin 1 [Source:HGNC Symbol;Acc:HGNC:18628]	-	-	-	-	GO:0005886//plasma membrane;GO:0005887//integral component of plasma membrane;GO:0016020//membrane;GO:0016021//integral component of membrane;GO:0030666//endocytic vesicle membrane	GO:0005041//low-density lipoprotein particle receptor activity;GO:0005044//scavenger receptor activity;GO:0005509//calcium ion binding;GO:0005515//protein binding;GO:0005540//hyaluronic acid binding;GO:0015035//protein disulfide oxidoreductase activity;GO:0030169//low-density lipoprotein particle binding	GO:0006898//receptor-mediated endocytosis;GO:0006954//inflammatory response;GO:0007155//cell adhesion;GO:0007267//cell-cell signaling;GO:0016525//negative regulation of angiogenesis;GO:0042742//defense response to bacterium;GO:0055114//oxidation-reduction process
ENSG00000010361	0	0	0	0.07	0.21	0.03	0.09	0.05	0	0	0	1	4	1	2	2	FUZ	fuzzy planar cell polarity protein [Source:HGNC Symbol;Acc:HGNC:26219]	-	-	-	-	GO:0005737//cytoplasm;GO:0005856//cytoskeleton;GO:0042995//cell projection;GO:0070062//extracellular exosome	GO:0005515//protein binding	GO:0001736//establishment of planar polarity;GO:0001843//neural tube closure;GO:0001942//hair follicle development;GO:0007275//multicellular organism development;GO:0008285//negative regulation of cell proliferation;GO:0008589//regulation of smoothened signaling pathway;GO:0010172//embryonic body morphogenesis;GO:0015031//protein transport;GO:0016192//vesicle-mediated transport;GO:0030030//cell p…
ENSG00000010379	0	0.02	0.13	0.07	0.12	0.11	0.27	0.1	0	1	6	2	4	5	10	5	SLC6A13	solute carrier family 6 member 13 [Source:HGNC Symbol;Acc:HGNC:11046]	Organismal Systems;Organismal Systems	Nervous system;Nervous system	ko04727//GABAergic synapse;ko04721//Synaptic vesicle cycle	K05046;K05046	GO:0005886//plasma membrane;GO:0005887//integral component of plasma membrane;GO:0016020//membrane;GO:0016021//integral component of membrane;GO:0016323//basolateral plasma membrane;GO:0043005//neuron projection;GO:0070062//extracellular exosome	GO:0005308//creatine transmembrane transporter activity;GO:0005332//gamma-aminobutyric acid:sodium symporter activity;GO:0005368//taurine transmembrane transporter activity;GO:0005515//protein binding;GO:0008028//monocarboxylic acid transmembrane transporter activity;GO:0015171//amino acid transmembrane transporter activity;GO:0015185//gamma-aminobutyric acid transmembrane transporter activity;GO…	GO:0006836//neurotransmitter transport;GO:0010940//positive regulation of necrotic cell death;GO:0015718//monocarboxylic acid transport;GO:0015734//taurine transport;GO:0015881//creatine transmembrane transport;GO:0035725//sodium ion transmembrane transport;GO:0051939//gamma-aminobutyric acid import;GO:0055085//transmembrane transport;GO:0071705//nitrogen compound transport;GO:0089718//amino acid…
ENSG00000010404	3.11	3.02	2.6	3.16	3.18	3.19	3.82	2.99	322.61	329.57	291.52	276.37	323.63	311.26	365.53	336.63	IDS	iduronate 2-sulfatase [Source:HGNC Symbol;Acc:HGNC:5389]	Metabolism;Cellular Processes;Metabolism	Global and overview maps;Transport and catabolism;Glycan biosynthesis and metabolism	ko01100//Metabolic pathways;ko04142//Lysosome;ko00531//Glycosaminoglycan degradation	K01136;K01136;K01136	GO:0005764//lysosome;GO:0043202//lysosomal lumen	GO:0003824//catalytic activity;GO:0004423//iduronate-2-sulfatase activity;GO:0005509//calcium ion binding;GO:0008484//sulfuric ester hydrolase activity;GO:0016787//hydrolase activity;GO:0046872//metal ion binding	GO:0006027//glycosaminoglycan catabolic process;GO:0030207//chondroitin sulfate catabolic process
ENSG00000010438	0	0.05	0.11	0.06	0.05	0	0.05	0	0	1	2	1	1	0	1	0	PRSS3	serine protease 3 [Source:HGNC Symbol;Acc:HGNC:9486]	Environmental Information Processing;Human Diseases;Organismal Systems;Organismal Systems	Signaling molecules and interaction;Infectious diseases;Digestive system;Digestive system	ko04080//Neuroactive ligand-receptor interaction;ko05164//Influenza A;ko04972//Pancreatic secretion;ko04974//Protein digestion and absorption	K01312;K01312;K01312;K01312	GO:0005576//extracellular region;GO:0005615//extracellular space;GO:1904724//tertiary granule lumen	GO:0004252//serine-type endopeptidase activity;GO:0005509//calcium ion binding;GO:0005515//protein binding;GO:0008233//peptidase activity;GO:0008236//serine-type peptidase activity;GO:0016787//hydrolase activity;GO:0046872//metal ion binding	GO:0006508//proteolysis;GO:0007586//digestion;GO:0009235//cobalamin metabolic process;GO:0019730//antimicrobial humoral response;GO:0031638//zymogen activation;GO:0043312//neutrophil degranulation;GO:0043542//endothelial cell migration
ENSG00000010539	5.02	5.85	5.25	5.19	4.02	4.25	4.19	4.75	265	370	318	303	275	295	294	335	ZNF200	zinc finger protein 200 [Source:HGNC Symbol;Acc:HGNC:12993]	Human Diseases	Infectious diseases	ko05168//Herpes simplex infection	K09228	GO:0005634//nucleus	GO:0003674//molecular_function;GO:0005515//protein binding;GO:0046872//metal ion binding	GO:0008150//biological_process
ENSG00000010610	0.49	0.25	0.31	0.35	0.66	0.54	0.55	0.52	29	18	22	23	50	44	42	41	CD4	CD4 molecule [Source:HGNC Symbol;Acc:HGNC:1678]	Environmental Information Processing;Human Diseases;Human Diseases;Organismal Systems;Environmental Information Processing;Human Diseases;Organismal Systems;Organismal Systems;Organismal Systems;Human Diseases;Organismal Systems	Signaling molecules and interaction;Infectious diseases;Infectious disease: viral;Immune system;Signaling molecules and interaction;Immune diseases;Immune system;Immune system;Immune system;Cancer: overview;Immune system	ko04060//Cytokine-cytokine receptor interaction;ko05166//HTLV-I infection;ko05170//Human immunodeficiency virus 1 infection;ko04640//Hematopoietic cell lineage;ko04514//Cell adhesion molecules (CAMs);ko05340//Primary immunodeficiency;ko04659//Th17 cell differentiation;ko04660//T cell receptor signaling pathway;ko04658//Th1 and Th2 cell differentiation;ko05235//PD-L1 expression and PD-1 checkpoint…	K06454;K06454;K06454;K06454;K06454;K06454;K06454;K06454;K06454;K06454;K06454	GO:0005769//early endosome;GO:0005788//endoplasmic reticulum lumen;GO:0005789//endoplasmic reticulum membrane;GO:0005886//plasma membrane;GO:0005887//integral component of plasma membrane;GO:0009897//external side of plasma membrane;GO:0009986//cell surface;GO:0016020//membrane;GO:0016021//integral component of membrane;GO:0030665//clathrin-coated vesicle membrane;GO:0042101//T cell receptor comp…	GO:0001618//virus receptor activity;GO:0004888//transmembrane signaling receptor activity;GO:0005102//signaling receptor binding;GO:0005201//extracellular matrix structural constituent;GO:0005515//protein binding;GO:0008270//zinc ion binding;GO:0015026//coreceptor activity;GO:0019865//immunoglobulin binding;GO:0019899//enzyme binding;GO:0019901//protein kinase binding;GO:0023026//MHC class II pro…	GO:0001934//positive regulation of protein phosphorylation;GO:0002250//adaptive immune response;GO:0002376//immune system process;GO:0006948//induction by virus of host cell-cell fusion;GO:0006955//immune response;GO:0007155//cell adhesion;GO:0007165//signal transduction;GO:0007166//cell surface receptor signaling pathway;GO:0007167//enzyme linked receptor protein signaling pathway;GO:0007169//tr…
ENSG00000010626	1.64	2.07	2.39	1.97	2.16	1.89	2.13	1.75	39	66	70	52	68	64	72	56	LRRC23	leucine rich repeat containing 23 [Source:HGNC Symbol;Acc:HGNC:19138]	-	-	-	-	GO:0005575//cellular_component;GO:0005737//cytoplasm;GO:0005829//cytosol	GO:0003674//molecular_function;GO:0005515//protein binding	GO:0008150//biological_process
ENSG00000010671	0	0.02	0	0	0	0	0	0	0	1	0	0	0	0	0	0	BTK	Bruton tyrosine kinase [Source:HGNC Symbol;Acc:HGNC:1133]	Human Diseases;Environmental Information Processing;Organismal Systems;Organismal Systems;Organismal Systems;Organismal Systems;Human Diseases	Infectious diseases;Signal transduction;Immune system;Immune system;Development;Immune system;Immune diseases	ko05169//Epstein-Barr virus infection;ko04064//NF-kappa B signaling pathway;ko04662//B cell receptor signaling pathway;ko04664//Fc epsilon RI signaling pathway;ko04380//Osteoclast differentiation;ko04611//Platelet activation;ko05340//Primary immunodeficiency	K07370;K07370;K07370;K07370;K07370;K07370;K07370	GO:0005634//nucleus;GO:0005737//cytoplasm;GO:0005829//cytosol;GO:0005886//plasma membrane;GO:0016020//membrane;GO:0031410//cytoplasmic vesicle;GO:0045121//membrane raft;GO:0048471//perinuclear region of cytoplasm	GO:0000166//nucleotide binding;GO:0004672//protein kinase activity;GO:0004713//protein tyrosine kinase activity;GO:0004715//non-membrane spanning protein tyrosine kinase activity;GO:0005515//protein binding;GO:0005524//ATP binding;GO:0005547//phosphatidylinositol-3,4,5-trisphosphate binding;GO:0008289//lipid binding;GO:0016301//kinase activity;GO:0016740//transferase activity;GO:0042802//identica…	GO:0001805//positive regulation of type III hypersensitivity;GO:0001812//positive regulation of type I hypersensitivity;GO:0001818//negative regulation of cytokine production;GO:0002250//adaptive immune response;GO:0002344//B cell affinity maturation;GO:0002376//immune system process;GO:0002553//histamine secretion by mast cell;GO:0002721//regulation of B cell cytokine production;GO:0002755//MyD8…
ENSG00000010704	2.41	3.33	3.61	3.06	3.9	2.87	3.75	3.17	112	149	191	152	187	139	178	174	HFE	homeostatic iron regulator [Source:HGNC Symbol;Acc:HGNC:4886]	-	-	-	-	GO:0005615//extracellular space;GO:0005654//nucleoplasm;GO:0005769//early endosome;GO:0005886//plasma membrane;GO:0005887//integral component of plasma membrane;GO:0009897//external side of plasma membrane;GO:0016020//membrane;GO:0016021//integral component of membrane;GO:0031410//cytoplasmic vesicle;GO:0045177//apical part of cell;GO:0045178//basal part of cell;GO:0048471//perinuclear region of …	GO:0005102//signaling receptor binding;GO:0005515//protein binding;GO:0030881//beta-2-microglobulin binding;GO:0039706//co-receptor binding;GO:1990459//transferrin receptor binding	GO:0002626//negative regulation of T cell antigen processing and presentation;GO:0002725//negative regulation of T cell cytokine production;GO:0006811//ion transport;GO:0006879//cellular iron ion homeostasis;GO:0006953//acute-phase response;GO:0007565//female pregnancy;GO:0010039//response to iron ion;GO:0010106//cellular response to iron ion starvation;GO:0010628//positive regulation of gene exp…
ENSG00000010803	21.06	20.07	19.46	20.41	23.11	24.56	20.82	21.05	1264	1495	1408	1360	1808	1998	1618	1681	SCMH1	Scm polycomb group protein homolog 1 [Source:HGNC Symbol;Acc:HGNC:19003]	-	-	-	-	GO:0005634//nucleus;GO:0005654//nucleoplasm;GO:0010369//chromocenter	GO:0003682//chromatin binding;GO:0005515//protein binding;GO:0042393//histone binding	GO:0006338//chromatin remodeling;GO:0006355//regulation of transcription, DNA-templated;GO:0007275//multicellular organism development;GO:0007283//spermatogenesis;GO:0009952//anterior/posterior pattern specification;GO:0016458//gene silencing;GO:0045892//negative regulation of transcription, DNA-templated
ENSG00000010810	22.22	23.05	25.67	24.66	30.76	27.56	23.75	27.55	978	1233	1200	1129	1431	1555	1316	1367	FYN	FYN proto-oncogene, Src family tyrosine kinase [Source:HGNC Symbol;Acc:HGNC:4037]	Human Diseases;Environmental Information Processing;Cellular Processes;Organismal Systems;Organismal Systems;Organismal Systems;Human Diseases;Organismal Systems;Organismal Systems;Environmental Information Processing;Organismal Systems;Organismal Systems;Cellular Processes;Human Diseases	Infectious diseases;Signal transduction;Cellular community - eukaryotes;Immune system;Development;Immune system;Cardiovascular diseases;Development;Immune system;Signal transduction;Nervous system;Immune system;Cellular community - eukaryotes;Neurodegenerative diseases	ko05130//Pathogenic Escherichia coli infection;ko04072//Phospholipase D signaling pathway;ko04510//Focal adhesion;ko04650//Natural killer cell mediated cytotoxicity;ko04360//Axon guidance;ko04664//Fc epsilon RI signaling pathway;ko05416//Viral myocarditis;ko04380//Osteoclast differentiation;ko04611//Platelet activation;ko04071//Sphingolipid signaling pathway;ko04725//Cholinergic synapse;ko04660//…	K05703;K05703;K05703;K05703;K05703;K05703;K05703;K05703;K05703;K05703;K05703;K05703;K05703;K05703	GO:0005634//nucleus;GO:0005737//cytoplasm;GO:0005739//mitochondrion;GO:0005768//endosome;GO:0005829//cytosol;GO:0005884//actin filament;GO:0005886//plasma membrane;GO:0014069//postsynaptic density;GO:0016020//membrane;GO:0030425//dendrite;GO:0031234//extrinsic component of cytoplasmic side of plasma membrane;GO:0043231//intracellular membrane-bounded organelle;GO:0044297//cell body;GO:0045121//me…	GO:0000166//nucleotide binding;GO:0001664//G protein-coupled receptor binding;GO:0004672//protein kinase activity;GO:0004713//protein tyrosine kinase activity;GO:0004715//non-membrane spanning protein tyrosine kinase activity;GO:0005102//signaling receptor binding;GO:0005515//protein binding;GO:0005524//ATP binding;GO:0015631//tubulin binding;GO:0016301//kinase activity;GO:0016740//transferase ac…	GO:0000165//MAPK cascade;GO:0000304//response to singlet oxygen;GO:0001764//neuron migration;GO:0002223//stimulatory C-type lectin receptor signaling pathway;GO:0002250//adaptive immune response;GO:0002376//immune system process;GO:0003015//heart process;GO:0006468//protein phosphorylation;GO:0006816//calcium ion transport;GO:0007166//cell surface receptor signaling pathway;GO:0007169//transmembr…
ENSG00000010818	2.91	3.07	2.6	2.66	3.18	3.36	3.49	3.08	557	716	591	563	779	874	856	776	HIVEP2	HIVEP zinc finger 2 [Source:HGNC Symbol;Acc:HGNC:4921]	-	-	-	-	GO:0005634//nucleus;GO:0005654//nucleoplasm	GO:0000978//RNA polymerase II proximal promoter sequence-specific DNA binding;GO:0000981//DNA-binding transcription factor activity, RNA polymerase II-specific;GO:0003677//DNA binding;GO:0046872//metal ion binding	GO:0006357//regulation of transcription by RNA polymerase II
ENSG00000010932	0	0	0	0	0	0	0.02	0	0	0	0	0	0	0	1	0	FMO1	flavin containing dimethylaniline monoxygenase 1 [Source:HGNC Symbol;Acc:HGNC:3769]	Metabolism	Xenobiotics biodegradation and metabolism	ko00982//Drug metabolism - cytochrome P450	K00485	GO:0005783//endoplasmic reticulum;GO:0005788//endoplasmic reticulum lumen;GO:0005789//endoplasmic reticulum membrane;GO:0016020//membrane;GO:0016021//integral component of membrane;GO:0031090//organelle membrane;GO:0043231//intracellular membrane-bounded organelle	GO:0004497//monooxygenase activity;GO:0004499//N,N-dimethylaniline monooxygenase activity;GO:0005515//protein binding;GO:0016491//oxidoreductase activity;GO:0050660//flavin adenine dinucleotide binding;GO:0050661//NADP binding	GO:0006082//organic acid metabolic process;GO:0006805//xenobiotic metabolic process;GO:0006970//response to osmotic stress;GO:0009404//toxin metabolic process;GO:0017144//drug metabolic process;GO:0032496//response to lipopolysaccharide;GO:0055114//oxidation-reduction process;GO:0070995//NADPH oxidation
ENSG00000011007	21.23	24.29	23.03	23.99	20.64	21.55	21.07	19.95	1454	1933	1811	1709	1760	1907	1738	1745	ELOA	elongin A [Source:HGNC Symbol;Acc:HGNC:11620]	-	-	-	-	GO:0005615//extracellular space;GO:0005634//nucleus;GO:0005654//nucleoplasm;GO:0070449//elongin complex;GO:0090734//site of DNA damage	GO:0003746//translation elongation factor activity;GO:0005515//protein binding	GO:0006357//regulation of transcription by RNA polymerase II;GO:0006366//transcription by RNA polymerase II;GO:0006368//transcription elongation from RNA polymerase II promoter;GO:0006414//translational elongation
ENSG00000011009	32.65	51.74	53.21	52.84	53.74	49.28	53.01	51.29	1002	1948	1916	1756	2128	2060	2069	2062	LYPLA2	lysophospholipase 2 [Source:HGNC Symbol;Acc:HGNC:6738]	Metabolism	Lipid metabolism	ko00564//Glycerophospholipid metabolism	K06130	GO:0005737//cytoplasm;GO:0005795//Golgi stack;GO:0005829//cytosol;GO:0070062//extracellular exosome	GO:0004622//lysophospholipase activity;GO:0005515//protein binding;GO:0008474//palmitoyl-(protein) hydrolase activity;GO:0016787//hydrolase activity;GO:0045296//cadherin binding;GO:0052689//carboxylic ester hydrolase activity	GO:0002084//protein depalmitoylation;GO:0006629//lipid metabolic process;GO:0006631//fatty acid metabolic process;GO:0007411//axon guidance;GO:0018215//protein phosphopantetheinylation;GO:0046464//acylglycerol catabolic process;GO:1905344//prostaglandin catabolic process
ENSG00000011021	10.31	10.73	10.1	10.93	11.02	11.31	10.74	10.19	1108	1407	1295	1280	1514	1644	1486	1445	CLCN6	chloride voltage-gated channel 6 [Source:HGNC Symbol;Acc:HGNC:2024]	-	-	-	-	GO:0005765//lysosomal membrane;GO:0005768//endosome;GO:0010008//endosome membrane;GO:0016020//membrane;GO:0016021//integral component of membrane;GO:0043231//intracellular membrane-bounded organelle	GO:0000166//nucleotide binding;GO:0005247//voltage-gated chloride channel activity;GO:0005524//ATP binding;GO:0015108//chloride transmembrane transporter activity;GO:0015297//antiporter activity	GO:0006811//ion transport;GO:0006821//chloride transport;GO:0006884//cell volume homeostasis;GO:0007165//signal transduction;GO:0009612//response to mechanical stimulus;GO:0034220//ion transmembrane transport;GO:0055085//transmembrane transport;GO:1902476//chloride transmembrane transport
ENSG00000011028	0.07	0	0	0	0.06	0.11	0.02	0	5	0	0	0	8	7	3	0	MRC2	mannose receptor C type 2 [Source:HGNC Symbol;Acc:HGNC:16875]	Human Diseases;Cellular Processes	Infectious diseases;Transport and catabolism	ko05152//Tuberculosis;ko04145//Phagosome	K06560;K06560	GO:0005925//focal adhesion;GO:0016020//membrane;GO:0016021//integral component of membrane	GO:0005515//protein binding;GO:0005518//collagen binding;GO:0030246//carbohydrate binding;GO:0038023//signaling receptor activity	GO:0001649//osteoblast differentiation;GO:0006897//endocytosis;GO:0030574//collagen catabolic process
ENSG00000011052	4.09	4.33	6.04	4.81	7.94	5.56	6.97	6.67	75.44	105.9	141.01	105.48	202.52	151.51	178.76	174.32	NME1-NME2	NME1-NME2 readthrough [Source:HGNC Symbol;Acc:HGNC:33531]	Metabolism;Metabolism;Metabolism;Metabolism	Global and overview maps;Nucleotide metabolism;Xenobiotics biodegradation and metabolism;Nucleotide metabolism	ko01100//Metabolic pathways;ko00230//Purine metabolism;ko00983//Drug metabolism - other enzymes;ko00240//Pyrimidine metabolism	K00940;K00940;K00940;K00940	GO:0005829//cytosol	GO:0000166//nucleotide binding;GO:0004550//nucleoside diphosphate kinase activity;GO:0005524//ATP binding;GO:0016301//kinase activity;GO:0016740//transferase activity	GO:0006165//nucleoside diphosphate phosphorylation;GO:0006183//GTP biosynthetic process;GO:0006228//UTP biosynthetic process;GO:0006241//CTP biosynthetic process;GO:0016310//phosphorylation
ENSG00000011083	0	0	0	0	0	0	0	0.01	0	0	0	0	0	0	0	1	SLC6A7	solute carrier family 6 member 7 [Source:HGNC Symbol;Acc:HGNC:11054]	Organismal Systems	Nervous system	ko04721//Synaptic vesicle cycle	K05040	GO:0005886//plasma membrane;GO:0005887//integral component of plasma membrane;GO:0016020//membrane;GO:0016021//integral component of membrane	GO:0005298//proline:sodium symporter activity;GO:0015193//L-proline transmembrane transporter activity;GO:0015293//symporter activity	GO:0003333//amino acid transmembrane transport;GO:0006836//neurotransmitter transport;GO:0006865//amino acid transport;GO:0015824//proline transport;GO:0035524//proline transmembrane transport;GO:0035725//sodium ion transmembrane transport;GO:1903825//organic acid transmembrane transport
ENSG00000011105	7.81	9.89	9.8	11.5	13.77	13.35	11.69	13.37	555	961	972	901	1250	1142	1251	1343	TSPAN9	tetraspanin 9 [Source:HGNC Symbol;Acc:HGNC:21640]	-	-	-	-	GO:0005886//plasma membrane;GO:0005887//integral component of plasma membrane;GO:0005925//focal adhesion;GO:0016020//membrane;GO:0016021//integral component of membrane;GO:0097197//tetraspanin-enriched microdomain	GO:0003674//molecular_function	GO:0008150//biological_process
ENSG00000011114	10.12	8.99	11.42	9.26	6.77	7.07	7.8	7.85	1171	1188	1192	1201	941	1067	1118	1149	BTBD7	BTB domain containing 7 [Source:HGNC Symbol;Acc:HGNC:18269]	-	-	-	-	GO:0005634//nucleus	GO:0005515//protein binding	GO:0007275//multicellular organism development;GO:0060693//regulation of branching involved in salivary gland morphogenesis;GO:0061138//morphogenesis of a branching epithelium
ENSG00000011132	2.68	4.71	4.47	4.64	5.15	5.34	4.78	4.94	114	245	227	217	280	310	261	277	APBA3	amyloid beta precursor protein binding family A member 3 [Source:HGNC Symbol;Acc:HGNC:580]	-	-	-	-	GO:0005737//cytoplasm;GO:0005886//plasma membrane;GO:0043197//dendritic spine;GO:0048471//perinuclear region of cytoplasm	GO:0001540//amyloid-beta binding;GO:0004857//enzyme inhibitor activity;GO:0005515//protein binding;GO:0019899//enzyme binding	GO:0001701//in utero embryonic development;GO:0007268//chemical synaptic transmission;GO:0010468//regulation of gene expression;GO:0015031//protein transport;GO:0043086//negative regulation of catalytic activity;GO:0050790//regulation of catalytic activity
ENSG00000011143	9.05	8.82	9.92	9.92	9.51	8.05	9.31	8.81	327	420	466	429.04	495	414.05	451	466	MKS1	MKS transition zone complex subunit 1 [Source:HGNC Symbol;Acc:HGNC:7121]	-	-	-	-	GO:0005737//cytoplasm;GO:0005813//centrosome;GO:0005814//centriole;GO:0005815//microtubule organizing center;GO:0005829//cytosol;GO:0005856//cytoskeleton;GO:0005929//cilium;GO:0016020//membrane;GO:0035869//ciliary transition zone;GO:0036038//MKS complex;GO:0036064//ciliary basal body;GO:0042995//cell projection	GO:0005515//protein binding	GO:0001843//neural tube closure;GO:0003271//smoothened signaling pathway involved in regulation of secondary heart field cardioblast proliferation;GO:0007368//determination of left/right symmetry;GO:0008589//regulation of smoothened signaling pathway;GO:0010669//epithelial structure maintenance;GO:0030030//cell projection organization;GO:0042733//embryonic digit morphogenesis;GO:0044458//motile c…
ENSG00000011198	3.78	3.46	3.44	3.78	3	2.75	3.21	3.72	178	216	181	192	170	158	160	201	ABHD5	abhydrolase domain containing 5, lysophosphatidic acid acyltransferase [Source:HGNC Symbol;Acc:HGNC:21396]	Organismal Systems	Endocrine system	ko04923//Regulation of lipolysis in adipocyte	K13699	GO:0005654//nucleoplasm;GO:0005737//cytoplasm;GO:0005739//mitochondrion;GO:0005811//lipid droplet;GO:0005829//cytosol;GO:0043231//intracellular membrane-bounded organelle	GO:0003841//1-acylglycerol-3-phosphate O-acyltransferase activity;GO:0005515//protein binding;GO:0008233//peptidase activity;GO:0016740//transferase activity;GO:0016746//transferase activity, transferring acyl groups;GO:0016787//hydrolase activity;GO:0042171//lysophosphatidic acid acyltransferase activity;GO:0052689//carboxylic ester hydrolase activity	GO:0006508//proteolysis;GO:0006629//lipid metabolic process;GO:0006631//fatty acid metabolic process;GO:0006654//phosphatidic acid biosynthetic process;GO:0008654//phospholipid biosynthetic process;GO:0010891//negative regulation of sequestering of triglyceride;GO:0010898//positive regulation of triglyceride catabolic process;GO:0030154//cell differentiation;GO:0050996//positive regulation of lip…
ENSG00000011201	0	0.01	0	0.01	0.03	0.01	0.02	0.01	0	1	0	1	4	2	3	2	ANOS1	anosmin 1 [Source:HGNC Symbol;Acc:HGNC:6211]	-	-	-	-	GO:0005576//extracellular region;GO:0005615//extracellular space;GO:0005886//plasma membrane;GO:0009986//cell surface;GO:0016020//membrane;GO:0031012//extracellular matrix	GO:0004867//serine-type endopeptidase inhibitor activity;GO:0005201//extracellular matrix structural constituent;GO:0005515//protein binding;GO:0008201//heparin binding;GO:0030414//peptidase inhibitor activity	GO:0006935//chemotaxis;GO:0007155//cell adhesion;GO:0007411//axon guidance;GO:0008543//fibroblast growth factor receptor signaling pathway;GO:0010466//negative regulation of peptidase activity;GO:0010951//negative regulation of endopeptidase activity;GO:0030182//neuron differentiation
ENSG00000011243	15.21	21.77	21.6	20.85	22.43	23.36	21.58	20.05	613	1078	1052	924	1161	1290	1125	1073	AKAP8L	A-kinase anchoring protein 8 like [Source:HGNC Symbol;Acc:HGNC:29857]	-	-	-	-	GO:0000785//chromatin;GO:0005634//nucleus;GO:0005737//cytoplasm;GO:0016363//nuclear matrix;GO:0016605//PML body;GO:0016607//nuclear speck;GO:1990904//ribonucleoprotein complex	GO:0003677//DNA binding;GO:0003723//RNA binding;GO:0005515//protein binding;GO:0005521//lamin binding;GO:0016301//kinase activity;GO:0017151//DEAD/H-box RNA helicase binding;GO:0034237//protein kinase A regulatory subunit binding;GO:0042826//histone deacetylase binding;GO:0046872//metal ion binding	GO:0006397//mRNA processing;GO:0007076//mitotic chromosome condensation;GO:0008380//RNA splicing;GO:0010793//regulation of mRNA export from nucleus;GO:0016032//viral process;GO:0016310//phosphorylation;GO:0031065//positive regulation of histone deacetylation;GO:0033127//regulation of histone phosphorylation;GO:0044839//cell cycle G2/M phase transition;GO:0045944//positive regulation of transcript…
ENSG00000011258	11.12	11.15	10.72	10.89	11.62	9.7	10.95	12.07	1118	1250	1228	1114	1365	1281	1376	1556	MBTD1	mbt domain containing 1 [Source:HGNC Symbol;Acc:HGNC:19866]	-	-	-	-	GO:0005634//nucleus	GO:0003682//chromatin binding;GO:0005515//protein binding;GO:0008270//zinc ion binding;GO:0035064//methylated histone binding;GO:0042393//histone binding;GO:0046872//metal ion binding	GO:0006325//chromatin organization;GO:0006355//regulation of transcription, DNA-templated;GO:0045892//negative regulation of transcription, DNA-templated;GO:0048706//embryonic skeletal system development
ENSG00000011260	37.1	45.13	47.48	47.49	43.9	37.68	42.19	47.12	1336	2010	2071	1889	2035	1864	1973	2267	UTP18	UTP18 small subunit processome component [Source:HGNC Symbol;Acc:HGNC:24274]	Genetic Information Processing	Translation	ko03008//Ribosome biogenesis in eukaryotes	K14553	GO:0005634//nucleus;GO:0005654//nucleoplasm;GO:0005730//nucleolus;GO:0016020//membrane;GO:0016021//integral component of membrane;GO:0031965//nuclear membrane;GO:0032040//small-subunit processome;GO:0034388//Pwp2p-containing subcomplex of 90S preribosome	GO:0003723//RNA binding;GO:0005515//protein binding	GO:0006364//rRNA processing
ENSG00000011275	12.2	12.26	12.13	12.46	11.81	12.4	12.55	11.88	1096	1499	1474	1383	1549	1628	1578	1583	RNF216	ring finger protein 216 [Source:HGNC Symbol;Acc:HGNC:21698]	-	-	-	-	GO:0005634//nucleus;GO:0005654//nucleoplasm;GO:0005737//cytoplasm;GO:0005829//cytosol;GO:0098685//Schaffer collateral - CA1 synapse;GO:0098843//postsynaptic endocytic zone;GO:0098978//glutamatergic synapse	GO:0005515//protein binding;GO:0016740//transferase activity;GO:0046872//metal ion binding;GO:0061630//ubiquitin protein ligase activity	GO:0006915//apoptotic process;GO:0016032//viral process;GO:0016567//protein ubiquitination;GO:0032480//negative regulation of type I interferon production;GO:0032648//regulation of interferon-beta production;GO:0043161//proteasome-mediated ubiquitin-dependent protein catabolic process;GO:0050691//regulation of defense response to virus by host;GO:0070936//protein K48-linked ubiquitination;GO:0099…
ENSG00000011295	9.27	11.7	11.6	12.11	13.74	10.37	11.07	11.86	479	662	662	643	722.68	661	698	750	TTC19	tetratricopeptide repeat domain 19 [Source:HGNC Symbol;Acc:HGNC:26006]	-	-	-	-	GO:0005739//mitochondrion;GO:0005743//mitochondrial inner membrane;GO:0005813//centrosome;GO:0016020//membrane;GO:0030496//midbody;GO:0070469//respiratory chain	GO:0005515//protein binding	GO:0000281//mitotic cytokinesis;GO:0007049//cell cycle;GO:0034551//mitochondrial respiratory chain complex III assembly;GO:0051301//cell division;GO:0055114//oxidation-reduction process
ENSG00000011304	175.46	184.2	175.75	185.44	179.95	200.22	205.92	168.99	10489	12816	11923	11830	13300	14268	13115	12930	PTBP1	polypyrimidine tract binding protein 1 [Source:HGNC Symbol;Acc:HGNC:9583]	-	-	-	-	GO:0005634//nucleus;GO:0005654//nucleoplasm;GO:0005730//nucleolus;GO:0016020//membrane;GO:0070062//extracellular exosome	GO:0003676//nucleic acid binding;GO:0003723//RNA binding;GO:0003729//mRNA binding;GO:0005515//protein binding;GO:0008187//poly-pyrimidine tract binding;GO:0036002//pre-mRNA binding	GO:0000381//regulation of alternative mRNA splicing, via spliceosome;GO:0000398//mRNA splicing, via spliceosome;GO:0006397//mRNA processing;GO:0006417//regulation of translation;GO:0008380//RNA splicing;GO:0008543//fibroblast growth factor receptor signaling pathway;GO:0016070//RNA metabolic process;GO:0033119//negative regulation of RNA splicing;GO:0035307//positive regulation of protein dephosp…
ENSG00000011332	1.49	1.43	1.27	1.69	1.33	1.59	1.55	0.96	45	60	55	68	62	74	73	49	DPF1	double PHD fingers 1 [Source:HGNC Symbol;Acc:HGNC:20225]	Organismal Systems;Human Diseases	Environmental adaptation;Cancers	ko04714//Thermogenesis;ko05225//Hepatocellular carcinoma	K22198;K22198	GO:0000785//chromatin;GO:0005634//nucleus;GO:0005737//cytoplasm;GO:0071565//nBAF complex	GO:0003712//transcription coregulator activity;GO:0005515//protein binding;GO:0008270//zinc ion binding;GO:0042393//histone binding;GO:0046872//metal ion binding;GO:1990837//sequence-specific double-stranded DNA binding	GO:0006915//apoptotic process;GO:0007399//nervous system development;GO:0045892//negative regulation of transcription, DNA-templated;GO:0045944//positive regulation of transcription by RNA polymerase II
ENSG00000011347	1.14	1.33	1.41	2.09	1.83	2.3	1.98	2.01	100	138	127	141	178	231	188	197	SYT7	synaptotagmin 7 [Source:HGNC Symbol;Acc:HGNC:11514]	-	-	-	-	GO:0005764//lysosome;GO:0005765//lysosomal membrane;GO:0005777//peroxisome;GO:0005778//peroxisomal membrane;GO:0005829//cytosol;GO:0005886//plasma membrane;GO:0008021//synaptic vesicle;GO:0016020//membrane;GO:0016021//integral component of membrane;GO:0030054//cell junction;GO:0030658//transport vesicle membrane;GO:0030670//phagocytic vesicle membrane;GO:0030672//synaptic vesicle membrane;GO:0031…	GO:0000149//SNARE binding;GO:0001786//phosphatidylserine binding;GO:0005509//calcium ion binding;GO:0005515//protein binding;GO:0005516//calmodulin binding;GO:0005544//calcium-dependent phospholipid binding;GO:0005546//phosphatidylinositol-4,5-bisphosphate binding;GO:0019905//syntaxin binding;GO:0030276//clathrin binding;GO:0046872//metal ion binding	GO:0001778//plasma membrane repair;GO:0006887//exocytosis;GO:0006909//phagocytosis;GO:0014059//regulation of dopamine secretion;GO:0016192//vesicle-mediated transport;GO:0017156//calcium ion regulated exocytosis;GO:0017158//regulation of calcium ion-dependent exocytosis;GO:0036465//synaptic vesicle recycling;GO:0045956//positive regulation of calcium ion-dependent exocytosis;GO:0046850//regulatio…
ENSG00000011376	14.28	17.9	17.66	18.37	18.96	16.61	17.31	17.98	1270	1887	1867	1734	2107	1977	1933	1977	LARS2	leucyl-tRNA synthetase 2, mitochondrial [Source:HGNC Symbol;Acc:HGNC:17095]	Genetic Information Processing	Translation	ko00970//Aminoacyl-tRNA biosynthesis	K01869	GO:0005739//mitochondrion;GO:0005759//mitochondrial matrix	GO:0000166//nucleotide binding;GO:0002161//aminoacyl-tRNA editing activity;GO:0004812//aminoacyl-tRNA ligase activity;GO:0004823//leucine-tRNA ligase activity;GO:0005524//ATP binding;GO:0016874//ligase activity	GO:0006412//translation;GO:0006418//tRNA aminoacylation for protein translation;GO:0006429//leucyl-tRNA aminoacylation;GO:0032543//mitochondrial translation;GO:0106074//aminoacyl-tRNA metabolism involved in translational fidelity
ENSG00000011405	22.77	21.2	16.45	18.91	12.96	12.02	14.76	14.81	3154	3014	2692	2749	2199	2389	2461	2642	PIK3C2A	phosphatidylinositol-4-phosphate 3-kinase catalytic subunit type 2 alpha [Source:HGNC Symbol;Acc:HGNC:8971]	Metabolism;Environmental Information Processing;Metabolism	Global and overview maps;Signal transduction;Carbohydrate metabolism	ko01100//Metabolic pathways;ko04070//Phosphatidylinositol signaling system;ko00562//Inositol phosphate metabolism	K00923;K00923;K00923	GO:0005634//nucleus;GO:0005654//nucleoplasm;GO:0005737//cytoplasm;GO:0005794//Golgi apparatus;GO:0005802//trans-Golgi network;GO:0005829//cytosol;GO:0005886//plasma membrane;GO:0005942//phosphatidylinositol 3-kinase complex;GO:0016020//membrane;GO:0030136//clathrin-coated vesicle;GO:0031410//cytoplasmic vesicle;GO:0031982//vesicle;GO:0043231//intracellular membrane-bounded organelle;GO:0070062//e…	GO:0000166//nucleotide binding;GO:0005524//ATP binding;GO:0016301//kinase activity;GO:0016303//1-phosphatidylinositol-3-kinase activity;GO:0016740//transferase activity;GO:0030276//clathrin binding;GO:0035004//phosphatidylinositol 3-kinase activity;GO:0035005//1-phosphatidylinositol-4-phosphate 3-kinase activity;GO:0035091//phosphatidylinositol binding;GO:0046934//phosphatidylinositol-4,5-bisphos…	GO:0006661//phosphatidylinositol biosynthetic process;GO:0006887//exocytosis;GO:0006897//endocytosis;GO:0007173//epidermal growth factor receptor signaling pathway;GO:0008286//insulin receptor signaling pathway;GO:0010508//positive regulation of autophagy;GO:0014065//phosphatidylinositol 3-kinase signaling;GO:0014829//vascular smooth muscle contraction;GO:0016310//phosphorylation;GO:0016477//cell…
ENSG00000011422	1.01	0.77	0.87	1	1.15	1.02	0.76	0.94	24	23	24	27	35	34	24	29	PLAUR	plasminogen activator, urokinase receptor [Source:HGNC Symbol;Acc:HGNC:9053]	Human Diseases;Organismal Systems	Cancers;Immune system	ko05205//Proteoglycans in cancer;ko04610//Complement and coagulation cascades	K03985;K03985	GO:0005576//extracellular region;GO:0005788//endoplasmic reticulum lumen;GO:0005789//endoplasmic reticulum membrane;GO:0005886//plasma membrane;GO:0005887//integral component of plasma membrane;GO:0005925//focal adhesion;GO:0009986//cell surface;GO:0016020//membrane;GO:0016021//integral component of membrane;GO:0019898//extrinsic component of membrane;GO:0030054//cell junction;GO:0031225//anchore…	GO:0005102//signaling receptor binding;GO:0005515//protein binding;GO:0019899//enzyme binding;GO:0019904//protein domain specific binding;GO:0030377//urokinase plasminogen activator receptor activity;GO:0038023//signaling receptor activity	GO:0001934//positive regulation of protein phosphorylation;GO:0006935//chemotaxis;GO:0007165//signal transduction;GO:0007596//blood coagulation;GO:0030162//regulation of proteolysis;GO:0034112//positive regulation of homotypic cell-cell adhesion;GO:0038195//urokinase plasminogen activator signaling pathway;GO:0042730//fibrinolysis;GO:0043066//negative regulation of apoptotic process;GO:0043312//n…
ENSG00000011426	45.89	37.13	36.05	36.17	30.2	38.24	33.82	33.61	3721	3690	3531	3311	3121	3438	3294	3607	ANLN	anillin actin binding protein [Source:HGNC Symbol;Acc:HGNC:14082]	-	-	-	-	GO:0005634//nucleus;GO:0005654//nucleoplasm;GO:0005737//cytoplasm;GO:0005826//actomyosin contractile ring;GO:0005856//cytoskeleton;GO:0005938//cell cortex;GO:0015629//actin cytoskeleton;GO:0030496//midbody;GO:0032059//bleb;GO:0042995//cell projection;GO:0099738//cell cortex region	GO:0003779//actin binding;GO:0005515//protein binding;GO:0031267//small GTPase binding;GO:0045296//cadherin binding	GO:0000281//mitotic cytokinesis;GO:0000915//actomyosin contractile ring assembly;GO:0000921//septin ring assembly;GO:0007049//cell cycle;GO:0007096//regulation of exit from mitosis;GO:0031106//septin ring organization;GO:0051301//cell division;GO:0090521//glomerular visceral epithelial cell migration;GO:1904172//positive regulation of bleb assembly
ENSG00000011451	8.14	9.06	9.13	10.78	9.38	10.41	8.95	8.09	695	981	948	1024	1065	1284	1027	942	WIZ	WIZ zinc finger [Source:HGNC Symbol;Acc:HGNC:30917]	-	-	-	-	GO:0005634//nucleus;GO:0005654//nucleoplasm;GO:0030496//midbody;GO:0070062//extracellular exosome	GO:0000978//RNA polymerase II proximal promoter sequence-specific DNA binding;GO:0000981//DNA-binding transcription factor activity, RNA polymerase II-specific;GO:0001226//RNA polymerase II transcription corepressor binding;GO:0005515//protein binding;GO:0044877//protein-containing complex binding;GO:0046872//metal ion binding;GO:1990226//histone methyltransferase binding	GO:0006357//regulation of transcription by RNA polymerase II;GO:0010571//positive regulation of nuclear cell cycle DNA replication;GO:0050821//protein stabilization
ENSG00000011454	11.28	12	11.51	10.31	11.09	10.69	10.1	10.34	1068	1314	1299	1096	1268	1359	1239	1328	RABGAP1	RAB GTPase activating protein 1 [Source:HGNC Symbol;Acc:HGNC:17155]	-	-	-	-	GO:0005737//cytoplasm;GO:0005813//centrosome;GO:0005815//microtubule organizing center;GO:0005829//cytosol;GO:0005856//cytoskeleton;GO:0005875//microtubule associated complex	GO:0005096//GTPase activator activity;GO:0005515//protein binding;GO:0015631//tubulin binding;GO:0031267//small GTPase binding	GO:0006886//intracellular protein transport;GO:0007049//cell cycle;GO:0043087//regulation of GTPase activity;GO:0043547//positive regulation of GTPase activity;GO:0090630//activation of GTPase activity
ENSG00000011465	0.04	0.65	0.18	0.22	0.21	0.06	0.36	0	1	22	4	9	8	3	10	0	DCN	decorin [Source:HGNC Symbol;Acc:HGNC:2705]	Human Diseases;Environmental Information Processing	Cancers;Signal transduction	ko05205//Proteoglycans in cancer;ko04350//TGF-beta signaling pathway	K04660;K04660	GO:0005576//extracellular region;GO:0005589//collagen type VI trimer;GO:0005615//extracellular space;GO:0005796//Golgi lumen;GO:0031012//extracellular matrix;GO:0043202//lysosomal lumen;GO:0062023//collagen-containing extracellular matrix	GO:0003723//RNA binding;GO:0005515//protein binding;GO:0005518//collagen binding;GO:0005539//glycosaminoglycan binding;GO:0030021//extracellular matrix structural constituent conferring compression resistance;GO:0047485//protein N-terminus binding;GO:0050840//extracellular matrix binding	GO:0001822//kidney development;GO:0001890//placenta development;GO:0007519//skeletal muscle tissue development;GO:0007568//aging;GO:0009612//response to mechanical stimulus;GO:0009887//animal organ morphogenesis;GO:0010508//positive regulation of autophagy;GO:0010596//negative regulation of endothelial cell migration;GO:0014068//positive regulation of phosphatidylinositol 3-kinase signaling;GO:00…
ENSG00000011478	9.48	13.05	14.13	15.49	15.54	15.46	13.19	14.71	377	617	653	670	791	829	680	763	QPCTL	glutaminyl-peptide cyclotransferase like [Source:HGNC Symbol;Acc:HGNC:25952]	-	-	-	-	GO:0000139//Golgi membrane;GO:0005794//Golgi apparatus;GO:0016020//membrane;GO:0016021//integral component of membrane	GO:0005515//protein binding;GO:0008270//zinc ion binding;GO:0016603//glutaminyl-peptide cyclotransferase activity;GO:0016740//transferase activity;GO:0016746//transferase activity, transferring acyl groups;GO:0046872//metal ion binding	GO:0017186//peptidyl-pyroglutamic acid biosynthetic process, using glutaminyl-peptide cyclotransferase;GO:0018215//protein phosphopantetheinylation
ENSG00000011485	29.72	31.93	30.11	29.8	29.21	32.99	29.06	28.92	1237	1629	1496	1365	1552	1871	1556	1590	PPP5C	protein phosphatase 5 catalytic subunit [Source:HGNC Symbol;Acc:HGNC:9322]	Environmental Information Processing	Signal transduction	ko04010//MAPK signaling pathway	K04460	GO:0005634//nucleus;GO:0005654//nucleoplasm;GO:0005737//cytoplasm;GO:0005829//cytosol;GO:0005886//plasma membrane;GO:0016020//membrane;GO:0032991//protein-containing complex;GO:0043005//neuron projection;GO:0043025//neuronal cell body;GO:0043204//perikaryon;GO:0043231//intracellular membrane-bounded organelle;GO:0071944//cell periphery;GO:0101031//chaperone complex;GO:1990635//proximal dendrite	GO:0001965//G-protein alpha-subunit binding;GO:0003723//RNA binding;GO:0004721//phosphoprotein phosphatase activity;GO:0004722//protein serine/threonine phosphatase activity;GO:0005515//protein binding;GO:0005524//ATP binding;GO:0008017//microtubule binding;GO:0008289//lipid binding;GO:0016787//hydrolase activity;GO:0016791//phosphatase activity;GO:0031072//heat shock protein binding;GO:0042802//…	GO:0000165//MAPK cascade;GO:0000278//mitotic cell cycle;GO:0001933//negative regulation of protein phosphorylation;GO:0006281//DNA repair;GO:0006351//transcription, DNA-templated;GO:0006470//protein dephosphorylation;GO:0006974//cellular response to DNA damage stimulus;GO:0010288//response to lead ion;GO:0016576//histone dephosphorylation;GO:0035970//peptidyl-threonine dephosphorylation;GO:004312…
ENSG00000011523	3.36	3.65	3.36	3.68	4.1	3.56	3.56	4	367	491	435	445	573	522	501	570	CEP68	centrosomal protein 68 [Source:HGNC Symbol;Acc:HGNC:29076]	-	-	-	-	GO:0005654//nucleoplasm;GO:0005737//cytoplasm;GO:0005813//centrosome;GO:0005815//microtubule organizing center;GO:0005829//cytosol;GO:0005856//cytoskeleton;GO:0030054//cell junction;GO:0034451//centriolar satellite	GO:0005515//protein binding;GO:0019901//protein kinase binding;GO:0019904//protein domain specific binding	GO:0007098//centrosome cycle;GO:0010457//centriole-centriole cohesion;GO:0033365//protein localization to organelle
ENSG00000011566	31.64	27.37	27.05	25.98	27.52	24.06	26.08	28.03	2504	2644	2584	2306	2739	2635	2675	2975	MAP4K3	mitogen-activated protein kinase kinase kinase kinase 3 [Source:HGNC Symbol;Acc:HGNC:6865]	Environmental Information Processing	Signal transduction	ko04010//MAPK signaling pathway	K04406	-	GO:0000166//nucleotide binding;GO:0004672//protein kinase activity;GO:0004674//protein serine/threonine kinase activity;GO:0005515//protein binding;GO:0005524//ATP binding;GO:0008349//MAP kinase kinase kinase kinase activity;GO:0016301//kinase activity;GO:0016740//transferase activity	GO:0000165//MAPK cascade;GO:0000185//activation of MAPKKK activity;GO:0006468//protein phosphorylation;GO:0007254//JNK cascade;GO:0009411//response to UV;GO:0016310//phosphorylation;GO:0034612//response to tumor necrosis factor;GO:0035556//intracellular signal transduction
ENSG00000011590	0	0	0.02	0	0.02	0	0	0.02	0	0	1	0	1	0	0	1	ZBTB32	zinc finger and BTB domain containing 32 [Source:HGNC Symbol;Acc:HGNC:16763]	-	-	-	-	GO:0000785//chromatin;GO:0005634//nucleus;GO:0005654//nucleoplasm	GO:0000978//RNA polymerase II proximal promoter sequence-specific DNA binding;GO:0000981//DNA-binding transcription factor activity, RNA polymerase II-specific;GO:0001227//DNA-binding transcription repressor activity, RNA polymerase II-specific;GO:0003677//DNA binding;GO:0005515//protein binding;GO:0008270//zinc ion binding;GO:0042802//identical protein binding;GO:0046872//metal ion binding;GO:19…	GO:0000122//negative regulation of transcription by RNA polymerase II;GO:0006357//regulation of transcription by RNA polymerase II
ENSG00000011600	0	0.08	0	0	0.07	0	0	0	0	1	0	0	1	0	0	0	TYROBP	transmembrane immune signaling adaptor TYROBP [Source:HGNC Symbol;Acc:HGNC:12449]	Organismal Systems;Organismal Systems	Immune system;Development	ko04650//Natural killer cell mediated cytotoxicity;ko04380//Osteoclast differentiation	K07992;K07992	GO:0005886//plasma membrane;GO:0005887//integral component of plasma membrane;GO:0009986//cell surface;GO:0016020//membrane;GO:0016021//integral component of membrane;GO:0030667//secretory granule membrane	GO:0005102//signaling receptor binding;GO:0005515//protein binding;GO:0042802//identical protein binding;GO:0042803//protein homodimerization activity;GO:0046872//metal ion binding	GO:0002222//stimulatory killer cell immunoglobulin-like receptor signaling pathway;GO:0002223//stimulatory C-type lectin receptor signaling pathway;GO:0002274//myeloid leukocyte activation;GO:0002282//microglial cell activation involved in immune response;GO:0002283//neutrophil activation involved in immune response;GO:0002376//immune system process;GO:0006968//cellular defense response;GO:000716…
ENSG00000011638	2.4	2.75	2.99	4	3.19	2.16	3.05	3.36	74	105	91	133	119	83	118	135	TMEM159	transmembrane protein 159 [Source:HGNC Symbol;Acc:HGNC:30136]	-	-	-	-	GO:0005783//endoplasmic reticulum;GO:0005789//endoplasmic reticulum membrane;GO:0005811//lipid droplet;GO:0016020//membrane;GO:0016021//integral component of membrane	GO:0005515//protein binding	GO:0140042//lipid droplet formation
ENSG00000011677	0	0	0	0	0	0	0	0	0	0	0	0	0	0	0	0	GABRA3	gamma-aminobutyric acid type A receptor subunit alpha3 [Source:HGNC Symbol;Acc:HGNC:4077]	Environmental Information Processing;Organismal Systems;Human Diseases;Organismal Systems;Organismal Systems;Human Diseases	Signaling molecules and interaction;Nervous system;Substance dependence;Nervous system;Sensory system;Substance dependence	ko04080//Neuroactive ligand-receptor interaction;ko04723//Retrograde endocannabinoid signaling;ko05032//Morphine addiction;ko04727//GABAergic synapse;ko04742//Taste transduction;ko05033//Nicotine addiction	K05175;K05175;K05175;K05175;K05175;K05175	GO:0005886//plasma membrane;GO:0005887//integral component of plasma membrane;GO:0016020//membrane;GO:0016021//integral component of membrane;GO:0030054//cell junction;GO:0032590//dendrite membrane;GO:0034707//chloride channel complex;GO:0043005//neuron projection;GO:0045202//synapse;GO:0045211//postsynaptic membrane;GO:0098794//postsynapse;GO:0098982//GABA-ergic synapse;GO:0099060//integral comp…	GO:0004888//transmembrane signaling receptor activity;GO:0004890//GABA-A receptor activity;GO:0005216//ion channel activity;GO:0005230//extracellular ligand-gated ion channel activity;GO:0005237//inhibitory extracellular ligand-gated ion channel activity;GO:0005254//chloride channel activity;GO:0005515//protein binding;GO:0008503//benzodiazepine receptor activity;GO:0022851//GABA-gated chloride i…	GO:0006811//ion transport;GO:0006821//chloride transport;GO:0007165//signal transduction;GO:0007214//gamma-aminobutyric acid signaling pathway;GO:0007268//chemical synaptic transmission;GO:0034220//ion transmembrane transport;GO:0042391//regulation of membrane potential;GO:0050877//nervous system process;GO:0051932//synaptic transmission, GABAergic;GO:0060078//regulation of postsynaptic membrane …
ENSG00000012048	18.57	14.93	14.65	13.23	14.7	12.02	13.16	12.37	1422	1585	1440	1317	1298	1239	1317	1337	BRCA1	BRCA1 DNA repair associated [Source:HGNC Symbol;Acc:HGNC:1100]	Environmental Information Processing;Human Diseases;Human Diseases;Genetic Information Processing;Human Diseases;Genetic Information Processing;Genetic Information Processing	Signal transduction;Cancers;Cancers;Folding, sorting and degradation;Drug resistance;Replication and repair;Replication and repair	ko04151//PI3K-Akt signaling pathway;ko05206//MicroRNAs in cancer;ko05224//Breast cancer;ko04120//Ubiquitin mediated proteolysis;ko01524//Platinum drug resistance;ko03460//Fanconi anemia pathway;ko03440//Homologous recombination	K10605;K10605;K10605;K10605;K10605;K10605;K10605	GO:0000151//ubiquitin ligase complex;GO:0000793//condensed chromosome;GO:0000794//condensed nuclear chromosome;GO:0000800//lateral element;GO:0005634//nucleus;GO:0005654//nucleoplasm;GO:0005694//chromosome;GO:0005737//cytoplasm;GO:0005886//plasma membrane;GO:0008274//gamma-tubulin ring complex;GO:0016020//membrane;GO:0016021//integral component of membrane;GO:0016604//nuclear body;GO:0031436//BRC…	GO:0000976//transcription regulatory region sequence-specific DNA binding;GO:0003677//DNA binding;GO:0003684//damaged DNA binding;GO:0003713//transcription coactivator activity;GO:0003723//RNA binding;GO:0004842//ubiquitin-protein transferase activity;GO:0005515//protein binding;GO:0008270//zinc ion binding;GO:0015631//tubulin binding;GO:0016740//transferase activity;GO:0019899//enzyme binding;GO…	GO:0000724//double-strand break repair via homologous recombination;GO:0000729//DNA double-strand break processing;GO:0006260//DNA replication;GO:0006281//DNA repair;GO:0006301//postreplication repair;GO:0006302//double-strand break repair;GO:0006303//double-strand break repair via nonhomologous end joining;GO:0006310//DNA recombination;GO:0006349//regulation of gene expression by genetic imprint…
ENSG00000012061	14.82	17.68	16.45	15.08	21.34	24.2	21.57	20.63	354.42	504.21	478.16	435.48	673.79	785.44	659.96	647.63	ERCC1	ERCC excision repair 1, endonuclease non-catalytic subunit [Source:HGNC Symbol;Acc:HGNC:3433]	Human Diseases;Genetic Information Processing;Genetic Information Processing	Drug resistance;Replication and repair;Replication and repair	ko01524//Platinum drug resistance;ko03460//Fanconi anemia pathway;ko03420//Nucleotide excision repair	K10849;K10849;K10849	GO:0000109//nucleotide-excision repair complex;GO:0000110//nucleotide-excision repair factor 1 complex;GO:0000781//chromosome, telomeric region;GO:0005634//nucleus;GO:0005654//nucleoplasm;GO:0005737//cytoplasm;GO:0070522//ERCC4-ERCC1 complex	GO:0000014//single-stranded DNA endodeoxyribonuclease activity;GO:0001094//TFIID-class transcription factor complex binding;GO:0003677//DNA binding;GO:0003684//damaged DNA binding;GO:0003697//single-stranded DNA binding;GO:0004518//nuclease activity;GO:0004519//endonuclease activity;GO:0005515//protein binding;GO:0008022//protein C-terminus binding;GO:0016787//hydrolase activity;GO:0019904//prote…	GO:0000710//meiotic mismatch repair;GO:0000720//pyrimidine dimer repair by nucleotide-excision repair;GO:0006281//DNA repair;GO:0006283//transcription-coupled nucleotide-excision repair;GO:0006289//nucleotide-excision repair;GO:0006293//nucleotide-excision repair, preincision complex stabilization;GO:0006295//nucleotide-excision repair, DNA incision, 3'-to lesion;GO:0006296//nucleotide-excision r…
ENSG00000012124	1.17	1.25	1.28	1.06	1.18	1.64	1.13	1.07	62	76	90	68	72	107	68	68	CD22	CD22 molecule [Source:HGNC Symbol;Acc:HGNC:1643]	Organismal Systems;Organismal Systems;Environmental Information Processing	Immune system;Immune system;Signaling molecules and interaction	ko04640//Hematopoietic cell lineage;ko04662//B cell receptor signaling pathway;ko04514//Cell adhesion molecules (CAMs)	K06467;K06467;K06467	GO:0005737//cytoplasm;GO:0005769//early endosome;GO:0005886//plasma membrane;GO:0005887//integral component of plasma membrane;GO:0009897//external side of plasma membrane;GO:0009986//cell surface;GO:0016020//membrane;GO:0016021//integral component of membrane;GO:0032809//neuronal cell body membrane;GO:0055037//recycling endosome;GO:0070062//extracellular exosome	GO:0001791//IgM binding;GO:0005102//signaling receptor binding;GO:0005515//protein binding;GO:0019903//protein phosphatase binding;GO:0030246//carbohydrate binding;GO:0033691//sialic acid binding;GO:0042609//CD4 receptor binding	GO:0002638//negative regulation of immunoglobulin production;GO:0007155//cell adhesion;GO:0030100//regulation of endocytosis;GO:0030888//regulation of B cell proliferation;GO:0042113//B cell activation;GO:0050776//regulation of immune response;GO:0050849//negative regulation of calcium-mediated signaling;GO:0050859//negative regulation of B cell receptor signaling pathway
ENSG00000012171	49.14	86.35	82.42	86.72	92.29	90.86	89.58	84.08	2706	5789	5363	5226	6471	6824	6321	6067	SEMA3B	semaphorin 3B [Source:HGNC Symbol;Acc:HGNC:10724]	Organismal Systems	Development	ko04360//Axon guidance	K06840	GO:0005576//extracellular region;GO:0005615//extracellular space;GO:0005783//endoplasmic reticulum;GO:0005887//integral component of plasma membrane;GO:0062023//collagen-containing extracellular matrix	GO:0005515//protein binding;GO:0030215//semaphorin receptor binding;GO:0045499//chemorepellent activity	GO:0001755//neural crest cell migration;GO:0007267//cell-cell signaling;GO:0007411//axon guidance;GO:0030335//positive regulation of cell migration;GO:0048843//negative regulation of axon extension involved in axon guidance;GO:0050919//negative chemotaxis;GO:0061643//chemorepulsion of axon;GO:0071526//semaphorin-plexin signaling pathway
ENSG00000012174	10.81	9.91	9.45	10.27	8.98	8.48	8.67	9.39	938	1054	981	981	998	1006	968	1077	MBTPS2	membrane bound transcription factor peptidase, site 2 [Source:HGNC Symbol;Acc:HGNC:15455]	Genetic Information Processing	Folding, sorting and degradation	ko04141//Protein processing in endoplasmic reticulum	K07765	GO:0000139//Golgi membrane;GO:0005737//cytoplasm;GO:0005789//endoplasmic reticulum membrane;GO:0016020//membrane;GO:0016021//integral component of membrane	GO:0004222//metalloendopeptidase activity;GO:0005515//protein binding;GO:0008233//peptidase activity;GO:0008237//metallopeptidase activity;GO:0016787//hydrolase activity;GO:0046872//metal ion binding	GO:0006508//proteolysis;GO:0006629//lipid metabolic process;GO:0008202//steroid metabolic process;GO:0008203//cholesterol metabolic process;GO:0030968//endoplasmic reticulum unfolded protein response;GO:0031293//membrane protein intracellular domain proteolysis;GO:0034976//response to endoplasmic reticulum stress;GO:0036500//ATF6-mediated unfolded protein response;GO:0045540//regulation of choles…
ENSG00000012211	1.65	1.89	2.56	2.27	1.88	1.99	2.56	2.37	81.29	126.14	143.24	106.32	108.51	141.8	144.52	142.88	PRICKLE3	prickle planar cell polarity protein 3 [Source:HGNC Symbol;Acc:HGNC:6645]	Environmental Information Processing	Signal transduction	ko04310//Wnt signaling pathway	K04511	GO:0005737//cytoplasm;GO:0005886//plasma membrane;GO:0016020//membrane	GO:0005515//protein binding;GO:0008270//zinc ion binding;GO:0046872//metal ion binding	GO:0007275//multicellular organism development;GO:0008150//biological_process;GO:0030030//cell projection organization
ENSG00000012223	0	0	0	0.02	0	0	0	0	0	0	0	1	0	0	0	0	LTF	lactotransferrin [Source:HGNC Symbol;Acc:HGNC:6720]	-	-	-	-	GO:0005576//extracellular region;GO:0005615//extracellular space;GO:0005634//nucleus;GO:0005737//cytoplasm;GO:0005769//early endosome;GO:0005886//plasma membrane;GO:0009986//cell surface;GO:0030141//secretory granule;GO:0032991//protein-containing complex;GO:0035580//specific granule lumen;GO:0042581//specific granule;GO:0055037//recycling endosome;GO:0070062//extracellular exosome;GO:0097013//ph…	GO:0001530//lipopolysaccharide binding;GO:0003677//DNA binding;GO:0004252//serine-type endopeptidase activity;GO:0004869//cysteine-type endopeptidase inhibitor activity;GO:0005506//iron ion binding;GO:0005515//protein binding;GO:0008201//heparin binding;GO:0008233//peptidase activity;GO:0008236//serine-type peptidase activity;GO:0016787//hydrolase activity;GO:0043539//protein serine/threonine kin…	GO:0001503//ossification;GO:0001817//regulation of cytokine production;GO:0001895//retina homeostasis;GO:0002227//innate immune response in mucosa;GO:0002376//immune system process;GO:0006508//proteolysis;GO:0006811//ion transport;GO:0006826//iron ion transport;GO:0006959//humoral immune response;GO:0019730//antimicrobial humoral response;GO:0019731//antibacterial humoral response;GO:0019732//ant…
ENSG00000012232	8.32	9.91	9.2	11.63	10.15	9.31	10.93	8.36	811	1209	1186	1130	1359	1284	1217	1297	EXTL3	exostosin like glycosyltransferase 3 [Source:HGNC Symbol;Acc:HGNC:3518]	Metabolism;Metabolism	Global and overview maps;Glycan biosynthesis and metabolism	ko01100//Metabolic pathways;ko00534//Glycosaminoglycan biosynthesis - heparan sulfate / heparin	K02370;K02370	GO:0005783//endoplasmic reticulum;GO:0005789//endoplasmic reticulum membrane;GO:0005794//Golgi apparatus;GO:0016020//membrane;GO:0016021//integral component of membrane	GO:0001888//glucuronyl-galactosyl-proteoglycan 4-alpha-N-acetylglucosaminyltransferase activity;GO:0005515//protein binding;GO:0016740//transferase activity;GO:0016757//transferase activity, transferring glycosyl groups;GO:0046872//metal ion binding	GO:0006486//protein glycosylation;GO:0015012//heparan sulfate proteoglycan biosynthetic process;GO:0030307//positive regulation of cell growth;GO:0036498//IRE1-mediated unfolded protein response
ENSG00000012504	52.13	46.1	44.52	45.49	33.24	32.63	38.8	38.61	2180	2235	2225	1992	1736	1791	1894	2016	NR1H4	nuclear receptor subfamily 1 group H member 4 [Source:HGNC Symbol;Acc:HGNC:7967]	Organismal Systems	Digestive system	ko04976//Bile secretion	K08537	GO:0000785//chromatin;GO:0000791//euchromatin;GO:0005634//nucleus;GO:0005654//nucleoplasm;GO:0042025//host cell nucleus;GO:0043235//receptor complex	GO:0000976//transcription regulatory region sequence-specific DNA binding;GO:0000977//RNA polymerase II regulatory region sequence-specific DNA binding;GO:0000978//RNA polymerase II proximal promoter sequence-specific DNA binding;GO:0000981//DNA-binding transcription factor activity, RNA polymerase II-specific;GO:0001228//DNA-binding transcription activator activity, RNA polymerase II-specific;GO…	GO:0000122//negative regulation of transcription by RNA polymerase II;GO:0001080//nitrogen catabolite activation of transcription from RNA polymerase II promoter;GO:0001678//cellular glucose homeostasis;GO:0002376//immune system process;GO:0006355//regulation of transcription, DNA-templated;GO:0006357//regulation of transcription by RNA polymerase II;GO:0006367//transcription initiation from RNA …
ENSG00000012660	65.17	56.31	54.45	53.11	49.24	48.31	48.46	51.67	3455	3543	3409	3048	3242	3408	3206	3544	ELOVL5	ELOVL fatty acid elongase 5 [Source:HGNC Symbol;Acc:HGNC:21308]	Metabolism;Metabolism;Metabolism;Metabolism	Global and overview maps;Global and overview maps;Lipid metabolism;Lipid metabolism	ko01100//Metabolic pathways;ko01212//Fatty acid metabolism;ko00062//Fatty acid elongation;ko01040//Biosynthesis of unsaturated fatty acids	K10244;K10244;K10244;K10244	GO:0005783//endoplasmic reticulum;GO:0005789//endoplasmic reticulum membrane;GO:0016020//membrane;GO:0016021//integral component of membrane;GO:0030176//integral component of endoplasmic reticulum membrane;GO:0030425//dendrite;GO:0042995//cell projection;GO:0043025//neuronal cell body;GO:0097447//dendritic tree	GO:0005515//protein binding;GO:0009922//fatty acid elongase activity;GO:0016740//transferase activity;GO:0102336//3-oxo-arachidoyl-CoA synthase activity;GO:0102337//3-oxo-cerotoyl-CoA synthase activity;GO:0102338//3-oxo-lignoceronyl-CoA synthase activity;GO:0102756//very-long-chain 3-ketoacyl-CoA synthase activity	GO:0006629//lipid metabolic process;GO:0006631//fatty acid metabolic process;GO:0006633//fatty acid biosynthetic process;GO:0006636//unsaturated fatty acid biosynthetic process;GO:0019367//fatty acid elongation, saturated fatty acid;GO:0030148//sphingolipid biosynthetic process;GO:0034625//fatty acid elongation, monounsaturated fatty acid;GO:0034626//fatty acid elongation, polyunsaturated fatty a…
ENSG00000012779	0	0.03	0	0	0.02	0.02	0.02	0	0	2	0	0	1	1	1	0	ALOX5	arachidonate 5-lipoxygenase [Source:HGNC Symbol;Acc:HGNC:435]	Metabolism;Organismal Systems;Organismal Systems;Human Diseases;Metabolism;Organismal Systems	Global and overview maps;Immune system;Nervous system;Infectious diseases;Lipid metabolism;Endocrine system	ko01100//Metabolic pathways;ko04664//Fc epsilon RI signaling pathway;ko04726//Serotonergic synapse;ko05145//Toxoplasmosis;ko00590//Arachidonic acid metabolism;ko04913//Ovarian Steroidogenesis	K00461;K00461;K00461;K00461;K00461;K00461	GO:0005576//extracellular region;GO:0005615//extracellular space;GO:0005634//nucleus;GO:0005635//nuclear envelope;GO:0005641//nuclear envelope lumen;GO:0005654//nucleoplasm;GO:0005737//cytoplasm;GO:0005829//cytosol;GO:0016020//membrane;GO:0016363//nuclear matrix;GO:0031965//nuclear membrane;GO:0034774//secretory granule lumen;GO:0048471//perinuclear region of cytoplasm;GO:1904813//ficolin-1-rich …	GO:0004051//arachidonate 5-lipoxygenase activity;GO:0005506//iron ion binding;GO:0005515//protein binding;GO:0016491//oxidoreductase activity;GO:0016702//oxidoreductase activity, acting on single donors with incorporation of molecular oxygen, incorporation of two atoms of oxygen;GO:0016787//hydrolase activity;GO:0046872//metal ion binding;GO:0051213//dioxygenase activity	GO:0001937//negative regulation of endothelial cell proliferation;GO:0002232//leukocyte chemotaxis involved in inflammatory response;GO:0002523//leukocyte migration involved in inflammatory response;GO:0002540//leukotriene production involved in inflammatory response;GO:0006691//leukotriene metabolic process;GO:0006954//inflammatory response;GO:0006959//humoral immune response;GO:0016525//negativ…
ENSG00000012817	9.66	11.9	10.85	11.98	12.37	10.18	11.04	11.48	886	1268	1239	1238	1408	1288	1297	1305	KDM5D	lysine demethylase 5D [Source:HGNC Symbol;Acc:HGNC:11115]	-	-	-	-	GO:0001650//fibrillar center;GO:0005634//nucleus;GO:0005654//nucleoplasm;GO:0035097//histone methyltransferase complex	GO:0003677//DNA binding;GO:0005515//protein binding;GO:0016491//oxidoreductase activity;GO:0032452//histone demethylase activity;GO:0032453//histone demethylase activity (H3-K4 specific);GO:0034647//histone demethylase activity (H3-trimethyl-K4 specific);GO:0046872//metal ion binding;GO:0050681//androgen receptor binding;GO:0051213//dioxygenase activity	GO:0006325//chromatin organization;GO:0006338//chromatin remodeling;GO:0034720//histone H3-K4 demethylation;GO:0034721//histone H3-K4 demethylation, trimethyl-H3-K4-specific;GO:0055114//oxidation-reduction process;GO:0060765//regulation of androgen receptor signaling pathway
ENSG00000012822	1.79	2.21	1.87	1.95	3.05	3.31	3.19	2.78	114	182	170	155	259	289	280	260	CALCOCO1	calcium binding and coiled-coil domain 1 [Source:HGNC Symbol;Acc:HGNC:29306]	-	-	-	-	GO:0000785//chromatin;GO:0005634//nucleus;GO:0005737//cytoplasm;GO:0005829//cytosol;GO:0043231//intracellular membrane-bounded organelle	GO:0000976//transcription regulatory region sequence-specific DNA binding;GO:0000978//RNA polymerase II proximal promoter sequence-specific DNA binding;GO:0003682//chromatin binding;GO:0003712//transcription coregulator activity;GO:0003713//transcription coactivator activity;GO:0005515//protein binding;GO:0008013//beta-catenin binding;GO:0008022//protein C-terminus binding;GO:0030374//nuclear rec…	GO:0007165//signal transduction;GO:0010628//positive regulation of gene expression;GO:0016055//Wnt signaling pathway;GO:0030518//intracellular steroid hormone receptor signaling pathway;GO:0045893//positive regulation of transcription, DNA-templated;GO:0045944//positive regulation of transcription by RNA polymerase II
ENSG00000012963	13.96	14.01	13.08	12.56	12.02	11.2	12.42	12.83	928.88	1048	891.88	879	951	955	982	1016	UBR7	ubiquitin protein ligase E3 component n-recognin 7 [Source:HGNC Symbol;Acc:HGNC:20344]	-	-	-	-	GO:0005737//cytoplasm	GO:0003674//molecular_function;GO:0008270//zinc ion binding;GO:0016740//transferase activity;GO:0046872//metal ion binding;GO:0061630//ubiquitin protein ligase activity	GO:0008150//biological_process;GO:0016567//protein ubiquitination
ENSG00000012983	18.46	22.65	20.88	19.5	15.52	16.4	19.07	18.15	1342	1377	1357	1199	1063	1101	1128	1227	MAP4K5	mitogen-activated protein kinase kinase kinase kinase 5 [Source:HGNC Symbol;Acc:HGNC:6867]	-	-	-	-	GO:0005737//cytoplasm	GO:0000166//nucleotide binding;GO:0004672//protein kinase activity;GO:0004674//protein serine/threonine kinase activity;GO:0005515//protein binding;GO:0005524//ATP binding;GO:0008349//MAP kinase kinase kinase kinase activity;GO:0016301//kinase activity;GO:0016740//transferase activity	GO:0000185//activation of MAPKKK activity;GO:0006468//protein phosphorylation;GO:0007257//activation of JUN kinase activity;GO:0016310//phosphorylation;GO:0035556//intracellular signal transduction
ENSG00000013016	0.8	0.87	1.07	0.9	0.91	0.79	1.03	0.81	75	100	121	93	110	102	125	101	EHD3	EH domain containing 3 [Source:HGNC Symbol;Acc:HGNC:3244]	Cellular Processes	Transport and catabolism	ko04144//Endocytosis	K12476	GO:0005634//nucleus;GO:0005737//cytoplasm;GO:0005768//endosome;GO:0005769//early endosome;GO:0005829//cytosol;GO:0005886//plasma membrane;GO:0005925//focal adhesion;GO:0005929//cilium;GO:0010008//endosome membrane;GO:0016020//membrane;GO:0020018//ciliary pocket membrane;GO:0030139//endocytic vesicle;GO:0042995//cell projection;GO:0043231//intracellular membrane-bounded organelle;GO:0048471//perin…	GO:0000166//nucleotide binding;GO:0003676//nucleic acid binding;GO:0005509//calcium ion binding;GO:0005515//protein binding;GO:0005524//ATP binding;GO:0005525//GTP binding;GO:0046872//metal ion binding	GO:0001881//receptor recycling;GO:0006897//endocytosis;GO:0007596//blood coagulation;GO:0015031//protein transport;GO:0016197//endosomal transport;GO:0030030//cell projection organization;GO:0032456//endocytic recycling;GO:0034498//early endosome to Golgi transport;GO:0051260//protein homooligomerization;GO:0055117//regulation of cardiac muscle contraction;GO:0060271//cilium assembly;GO:0072659//…
ENSG00000013275	51.49	70.68	70.16	68.21	61.49	57.68	57.71	56.99	1727	2935	2849	2553	2676	2679	2514	2550	PSMC4	proteasome 26S subunit, ATPase 4 [Source:HGNC Symbol;Acc:HGNC:9551]	Human Diseases;Genetic Information Processing	Infectious diseases;Folding, sorting and degradation	ko05169//Epstein-Barr virus infection;ko03050//Proteasome	K03063;K03063	GO:0000502//proteasome complex;GO:0005634//nucleus;GO:0005654//nucleoplasm;GO:0005737//cytoplasm;GO:0005829//cytosol;GO:0008540//proteasome regulatory particle, base subcomplex;GO:0016020//membrane;GO:0016234//inclusion body;GO:0022624//proteasome accessory complex;GO:0031597//cytosolic proteasome complex;GO:0045202//synapse	GO:0000166//nucleotide binding;GO:0005515//protein binding;GO:0005524//ATP binding;GO:0016787//hydrolase activity;GO:0016887//ATPase activity;GO:0036402//proteasome-activating ATPase activity	GO:0000165//MAPK cascade;GO:0000209//protein polyubiquitination;GO:0002223//stimulatory C-type lectin receptor signaling pathway;GO:0002479//antigen processing and presentation of exogenous peptide antigen via MHC class I, TAP-dependent;GO:0006508//proteolysis;GO:0006521//regulation of cellular amino acid metabolic process;GO:0010972//negative regulation of G2/M transition of mitotic cell cycle;G…
ENSG00000013288	5.38	5.78	5.85	5.63	5.84	6.46	5.75	5.36	585	744	704	596	719	848	726	715	MAN2B2	mannosidase alpha class 2B member 2 [Source:HGNC Symbol;Acc:HGNC:29623]	Metabolism	Glycan biosynthesis and metabolism	ko00511//Other glycan degradation	K12312	GO:0005576//extracellular region;GO:0005764//lysosome;GO:0005774//vacuolar membrane;GO:0043202//lysosomal lumen;GO:0070062//extracellular exosome	GO:0003824//catalytic activity;GO:0004559//alpha-mannosidase activity;GO:0005515//protein binding;GO:0016787//hydrolase activity;GO:0016798//hydrolase activity, acting on glycosyl bonds;GO:0030246//carbohydrate binding;GO:0046872//metal ion binding	GO:0005975//carbohydrate metabolic process;GO:0006013//mannose metabolic process;GO:0008152//metabolic process;GO:0009313//oligosaccharide catabolic process
ENSG00000013293	0	0	0	0	0	0	0	0	0	0	0	0	0	0	0	0	SLC7A14	solute carrier family 7 member 14 [Source:HGNC Symbol;Acc:HGNC:29326]	-	-	-	-	GO:0005654//nucleoplasm;GO:0005764//lysosome;GO:0005765//lysosomal membrane;GO:0005829//cytosol;GO:0005886//plasma membrane;GO:0016020//membrane;GO:0016021//integral component of membrane;GO:0043231//intracellular membrane-bounded organelle	GO:0005515//protein binding;GO:0015171//amino acid transmembrane transporter activity;GO:0022857//transmembrane transporter activity	GO:0003333//amino acid transmembrane transport;GO:0006865//amino acid transport;GO:0010923//negative regulation of phosphatase activity;GO:0055085//transmembrane transport
ENSG00000013297	2.4	2.65	2.73	2.43	2.87	2.71	3.09	2.81	129	175	176	144	198	199	214	200	CLDN11	claudin 11 [Source:HGNC Symbol;Acc:HGNC:8514]	Human Diseases;Cellular Processes;Human Diseases;Environmental Information Processing;Organismal Systems	Infectious diseases;Cellular community - eukaryotes;Infectious diseases;Signaling molecules and interaction;Immune system	ko05130//Pathogenic Escherichia coli infection;ko04530//Tight junction;ko05160//Hepatitis C;ko04514//Cell adhesion molecules (CAMs);ko04670//Leukocyte transendothelial migration	K06087;K06087;K06087;K06087;K06087	GO:0005811//lipid droplet;GO:0005883//neurofilament;GO:0005886//plasma membrane;GO:0005923//bicellular tight junction;GO:0016020//membrane;GO:0016021//integral component of membrane;GO:0030054//cell junction;GO:0030424//axon;GO:0045178//basal part of cell;GO:0070160//tight junction	GO:0005198//structural molecule activity;GO:0005515//protein binding;GO:0042802//identical protein binding	GO:0007155//cell adhesion;GO:0007283//spermatogenesis;GO:0008366//axon ensheathment;GO:0016338//calcium-independent cell-cell adhesion via plasma membrane cell-adhesion molecules;GO:0070830//bicellular tight junction assembly;GO:0120192//tight junction assembly
ENSG00000013306	94.08	114.1	108.02	111.59	111.48	115.9	106.73	98.59	2809	4167	3860	3625	4256	4731	4092	3885	SLC25A39	solute carrier family 25 member 39 [Source:HGNC Symbol;Acc:HGNC:24279]	-	-	-	-	GO:0005739//mitochondrion;GO:0005743//mitochondrial inner membrane;GO:0016020//membrane;GO:0016021//integral component of membrane	GO:0005347//ATP transmembrane transporter activity	GO:0006783//heme biosynthetic process;GO:0055085//transmembrane transport
ENSG00000013364	8.94	14.95	13.82	17.81	12.67	13.41	12.48	10.59	419	895	831	860	827	751	742	742	MVP	major vault protein [Source:HGNC Symbol;Acc:HGNC:7531]	-	-	-	-	GO:0005576//extracellular region;GO:0005634//nucleus;GO:0005643//nuclear pore;GO:0005737//cytoplasm;GO:0005829//cytosol;GO:0005856//cytoskeleton;GO:0016020//membrane;GO:0034774//secretory granule lumen;GO:0048471//perinuclear region of cytoplasm;GO:0070062//extracellular exosome;GO:1904813//ficolin-1-rich granule lumen	GO:0005515//protein binding;GO:0019901//protein kinase binding;GO:0019903//protein phosphatase binding;GO:0042802//identical protein binding	GO:0015031//protein transport;GO:0031953//negative regulation of protein autophosphorylation;GO:0038127//ERBB signaling pathway;GO:0042059//negative regulation of epidermal growth factor receptor signaling pathway;GO:0043312//neutrophil degranulation;GO:0051028//mRNA transport;GO:0061099//negative regulation of protein tyrosine kinase activity
ENSG00000013374	28.99	20.61	19.43	20.02	18.76	23.36	23.25	19.25	801	897	850	827	1026	1113	1008	996	NUB1	negative regulator of ubiquitin like proteins 1 [Source:HGNC Symbol;Acc:HGNC:17623]	-	-	-	-	GO:0005634//nucleus;GO:0005654//nucleoplasm;GO:0005730//nucleolus;GO:0005829//cytosol	GO:0005515//protein binding	GO:0006511//ubiquitin-dependent protein catabolic process;GO:0016567//protein ubiquitination;GO:0032436//positive regulation of proteasomal ubiquitin-dependent protein catabolic process;GO:0034341//response to interferon-gamma;GO:0034612//response to tumor necrosis factor;GO:0043687//post-translational protein modification;GO:2000058//regulation of ubiquitin-dependent protein catabolic process
ENSG00000013375	31.21	31.65	35.65	35.43	35.08	25.84	31.93	34.74	2335.93	2456.9	2549.91	2346.45	2536.21	2331.26	2459.05	2757.61	PGM3	phosphoglucomutase 3 [Source:HGNC Symbol;Acc:HGNC:8907]	Metabolism;Metabolism	Global and overview maps;Carbohydrate metabolism	ko01100//Metabolic pathways;ko00520//Amino sugar and nucleotide sugar metabolism	K01836;K01836	GO:0005575//cellular_component;GO:0005829//cytosol	GO:0000287//magnesium ion binding;GO:0004610//phosphoacetylglucosamine mutase activity;GO:0004614//phosphoglucomutase activity;GO:0016853//isomerase activity;GO:0016868//intramolecular transferase activity, phosphotransferases;GO:0046872//metal ion binding	GO:0005975//carbohydrate metabolic process;GO:0006041//glucosamine metabolic process;GO:0006048//UDP-N-acetylglucosamine biosynthetic process;GO:0006487//protein N-linked glycosylation;GO:0006493//protein O-linked glycosylation;GO:0007283//spermatogenesis;GO:0019255//glucose 1-phosphate metabolic process;GO:0030097//hemopoiesis;GO:0071704//organic substance metabolic process
ENSG00000013392	2.8	2.64	2.83	2.56	2.78	2.58	2.55	2.81	206	238	249	207	262	259	241	273	RWDD2A	RWD domain containing 2A [Source:HGNC Symbol;Acc:HGNC:21385]	-	-	-	-	-	GO:0005515//protein binding	-
ENSG00000013441	15.84	17.58	17.56	15.96	17.24	16.14	18.43	17.2	549	731	731	613	769	765	815	782	CLK1	CDC like kinase 1 [Source:HGNC Symbol;Acc:HGNC:2068]	Human Diseases	Infectious diseases	ko05134//Legionellosis	K23561	GO:0005634//nucleus;GO:0005737//cytoplasm	GO:0000166//nucleotide binding;GO:0004672//protein kinase activity;GO:0004674//protein serine/threonine kinase activity;GO:0004712//protein serine/threonine/tyrosine kinase activity;GO:0004713//protein tyrosine kinase activity;GO:0004715//non-membrane spanning protein tyrosine kinase activity;GO:0005515//protein binding;GO:0005524//ATP binding;GO:0016301//kinase activity;GO:0016740//transferase a…	GO:0006468//protein phosphorylation;GO:0016310//phosphorylation;GO:0018105//peptidyl-serine phosphorylation;GO:0018107//peptidyl-threonine phosphorylation;GO:0018108//peptidyl-tyrosine phosphorylation;GO:0043484//regulation of RNA splicing;GO:0046777//protein autophosphorylation
ENSG00000013503	7.34	6.56	6.94	7.29	6.82	6.59	6.65	6.45	599	657	678	655	713	735	698	696	POLR3B	RNA polymerase III subunit B [Source:HGNC Symbol;Acc:HGNC:30348]	Organismal Systems;Genetic Information Processing	Immune system;Transcription	ko04623//Cytosolic DNA-sensing pathway;ko03020//RNA polymerase	K03021;K03021	GO:0005634//nucleus;GO:0005654//nucleoplasm;GO:0005666//RNA polymerase III complex;GO:0005829//cytosol	GO:0003677//DNA binding;GO:0003899//DNA-directed 5'-3' RNA polymerase activity;GO:0016740//transferase activity;GO:0016779//nucleotidyltransferase activity;GO:0032549//ribonucleoside binding;GO:0046872//metal ion binding	GO:0002376//immune system process;GO:0006351//transcription, DNA-templated;GO:0032481//positive regulation of type I interferon production;GO:0032728//positive regulation of interferon-beta production;GO:0045087//innate immune response;GO:0045089//positive regulation of innate immune response;GO:0051607//defense response to virus
ENSG00000013523	7.28	8.44	7.65	8.35	8.38	8.44	9.45	9.24	671	861	873	832	1045	1080	1082.05	1126	ANGEL1	angel homolog 1 [Source:HGNC Symbol;Acc:HGNC:19961]	-	-	-	-	GO:0005634//nucleus;GO:0005783//endoplasmic reticulum;GO:0005801//cis-Golgi network;GO:0005829//cytosol;GO:0048471//perinuclear region of cytoplasm	GO:0000175//3'-5'-exoribonuclease activity;GO:0008190//eukaryotic initiation factor 4E binding;GO:0019904//protein domain specific binding	GO:0090503//RNA phosphodiester bond hydrolysis, exonucleolytic
ENSG00000013561	8.58	9.75	9.46	10.16	9	8.54	8.54	7.94	269	367	375	328	336	303	305	323	RNF14	ring finger protein 14 [Source:HGNC Symbol;Acc:HGNC:10058]	-	-	-	-	GO:0000151//ubiquitin ligase complex;GO:0005634//nucleus;GO:0005654//nucleoplasm;GO:0005737//cytoplasm;GO:0005829//cytosol	GO:0003713//transcription coactivator activity;GO:0004842//ubiquitin-protein transferase activity;GO:0005515//protein binding;GO:0016740//transferase activity;GO:0019787//ubiquitin-like protein transferase activity;GO:0031624//ubiquitin conjugating enzyme binding;GO:0046872//metal ion binding;GO:0050681//androgen receptor binding;GO:0061630//ubiquitin protein ligase activity	GO:0000209//protein polyubiquitination;GO:0006355//regulation of transcription, DNA-templated;GO:0006357//regulation of transcription by RNA polymerase II;GO:0006511//ubiquitin-dependent protein catabolic process;GO:0007165//signal transduction;GO:0016567//protein ubiquitination;GO:0018215//protein phosphopantetheinylation;GO:0030521//androgen receptor signaling pathway;GO:0032436//positive regul…
ENSG00000013563	2.18	2.73	2.69	2.64	2.64	3.03	3.11	2.4	66.52	114.1	99.03	104.08	117.64	129.73	133.54	108.2	DNASE1L1	deoxyribonuclease 1 like 1 [Source:HGNC Symbol;Acc:HGNC:2957]	-	-	-	-	GO:0005576//extracellular region;GO:0005634//nucleus;GO:0005783//endoplasmic reticulum;GO:0035580//specific granule lumen	GO:0003677//DNA binding;GO:0004518//nuclease activity;GO:0004519//endonuclease activity;GO:0004530//deoxyribonuclease I activity;GO:0004536//deoxyribonuclease activity;GO:0005515//protein binding;GO:0016787//hydrolase activity	GO:0000737//DNA catabolic process, endonucleolytic;GO:0006259//DNA metabolic process;GO:0006308//DNA catabolic process;GO:0043312//neutrophil degranulation;GO:0090305//nucleic acid phosphodiester bond hydrolysis
ENSG00000013573	10.78	21.09	18.49	21.66	16.96	15.97	15.01	16.36	684	1367	1249	1342	1320	1314	1244	1290	DDX11	DEAD/H-box helicase 11 [Source:HGNC Symbol;Acc:HGNC:2736]	-	-	-	-	GO:0000785//chromatin;GO:0000922//spindle pole;GO:0001650//fibrillar center;GO:0005634//nucleus;GO:0005654//nucleoplasm;GO:0005694//chromosome;GO:0005730//nucleolus;GO:0005737//cytoplasm;GO:0005813//centrosome;GO:0005815//microtubule organizing center;GO:0005856//cytoskeleton;GO:0030496//midbody;GO:0031390//Ctf18 RFC-like complex;GO:0070062//extracellular exosome	GO:0000166//nucleotide binding;GO:0003676//nucleic acid binding;GO:0003677//DNA binding;GO:0003678//DNA helicase activity;GO:0003682//chromatin binding;GO:0003688//DNA replication origin binding;GO:0003690//double-stranded DNA binding;GO:0003697//single-stranded DNA binding;GO:0003723//RNA binding;GO:0003727//single-stranded RNA binding;GO:0004386//helicase activity;GO:0005515//protein binding;GO…	GO:0006139//nucleobase-containing compound metabolic process;GO:0006260//DNA replication;GO:0006281//DNA repair;GO:0006974//cellular response to DNA damage stimulus;GO:0007062//sister chromatid cohesion;GO:0007275//multicellular organism development;GO:0016032//viral process;GO:0031297//replication fork processing;GO:0032079//positive regulation of endodeoxyribonuclease activity;GO:0032091//negat…
ENSG00000013583	13.76	17.44	16.5	18.83	19.39	17.28	17.5	18.59	319	497	452	474	574	545	515	571	HEBP1	heme binding protein 1 [Source:HGNC Symbol;Acc:HGNC:17176]	-	-	-	-	GO:0005576//extracellular region;GO:0005737//cytoplasm;GO:0070062//extracellular exosome	GO:0020037//heme binding	GO:0007186//G protein-coupled receptor signaling pathway;GO:0007623//circadian rhythm
ENSG00000013588	0.18	0.31	0.35	0.35	0.08	0.13	0.05	0.21	14	20	14	14	9	10	8	11	GPRC5A	G protein-coupled receptor class C group 5 member A [Source:HGNC Symbol;Acc:HGNC:9836]	-	-	-	-	GO:0005730//nucleolus;GO:0005886//plasma membrane;GO:0005887//integral component of plasma membrane;GO:0016020//membrane;GO:0016021//integral component of membrane;GO:0030659//cytoplasmic vesicle membrane;GO:0031410//cytoplasmic vesicle;GO:0031982//vesicle;GO:0043231//intracellular membrane-bounded organelle;GO:0043235//receptor complex;GO:0070062//extracellular exosome	GO:0004930//G protein-coupled receptor activity;GO:0005515//protein binding;GO:0030295//protein kinase activator activity;GO:0045296//cadherin binding	GO:0007165//signal transduction;GO:0007175//negative regulation of epidermal growth factor-activated receptor activity;GO:0007186//G protein-coupled receptor signaling pathway;GO:0032147//activation of protein kinase activity
ENSG00000013619	0	0.01	0.01	0.01	0	0	0	0.07	0	1	1	1	0	0	0	1	MAMLD1	mastermind like domain containing 1 [Source:HGNC Symbol;Acc:HGNC:2568]	-	-	-	-	GO:0005634//nucleus;GO:0005654//nucleoplasm;GO:0005794//Golgi apparatus;GO:0005813//centrosome;GO:0016604//nuclear body	GO:0003674//molecular_function	GO:0006357//regulation of transcription by RNA polymerase II;GO:0008584//male gonad development
ENSG00000013725	0	0	0.01	0	0	0	0	0	0	0	1	0	0	0	0	0	CD6	CD6 molecule [Source:HGNC Symbol;Acc:HGNC:1691]	Environmental Information Processing	Signaling molecules and interaction	ko04514//Cell adhesion molecules (CAMs)	K06456	GO:0001772//immunological synapse;GO:0005576//extracellular region;GO:0005886//plasma membrane;GO:0005887//integral component of plasma membrane;GO:0009897//external side of plasma membrane;GO:0016020//membrane;GO:0016021//integral component of membrane;GO:0031226//intrinsic component of plasma membrane;GO:0042101//T cell receptor complex	GO:0001530//lipopolysaccharide binding;GO:0005044//scavenger receptor activity;GO:0005515//protein binding;GO:0042802//identical protein binding;GO:0070891//lipoteichoic acid binding	GO:0001771//immunological synapse formation;GO:0002250//adaptive immune response;GO:0002376//immune system process;GO:0002438//acute inflammatory response to antigenic stimulus;GO:0006897//endocytosis;GO:0007155//cell adhesion;GO:0007157//heterophilic cell-cell adhesion via plasma membrane cell adhesion molecules;GO:0031663//lipopolysaccharide-mediated signaling pathway;GO:0032496//response to li…
ENSG00000013810	41.28	47.78	45.37	48.5	45.32	45.25	43.67	41.36	1695	3148	2941	2867	3049	3308	2959	2921	TACC3	transforming acidic coiled-coil containing protein 3 [Source:HGNC Symbol;Acc:HGNC:11524]	Genetic Information Processing	Translation	ko03013//RNA transport	K14283	GO:0000922//spindle pole;GO:0005737//cytoplasm;GO:0005815//microtubule organizing center;GO:0005819//spindle;GO:0005829//cytosol;GO:0005856//cytoskeleton;GO:0034451//centriolar satellite;GO:0043231//intracellular membrane-bounded organelle;GO:0072686//mitotic spindle	GO:0005515//protein binding	GO:0000226//microtubule cytoskeleton organization;GO:0007049//cell cycle;GO:0007052//mitotic spindle organization;GO:0007091//metaphase/anaphase transition of mitotic cell cycle;GO:0008283//cell proliferation;GO:0021987//cerebral cortex development;GO:0051301//cell division;GO:0060236//regulation of mitotic spindle organization;GO:1902850//microtubule cytoskeleton organization involved in mitosis
ENSG00000014123	14.36	12.03	11.65	11.87	9.56	9.36	11.09	10.96	1184	1216	1149	1078	1009	1055	1177	1194	UFL1	UFM1 specific ligase 1 [Source:HGNC Symbol;Acc:HGNC:23039]	-	-	-	-	GO:0005634//nucleus;GO:0005694//chromosome;GO:0005737//cytoplasm;GO:0005783//endoplasmic reticulum;GO:0005789//endoplasmic reticulum membrane;GO:0005829//cytosol;GO:0016020//membrane;GO:0032991//protein-containing complex;GO:0035861//site of double-strand break;GO:0043005//neuron projection	GO:0005515//protein binding;GO:0016740//transferase activity;GO:0019901//protein kinase binding;GO:0061666//UFM1 ligase activity;GO:0071568//UFM1 transferase activity	GO:0001649//osteoblast differentiation;GO:0006281//DNA repair;GO:0006974//cellular response to DNA damage stimulus;GO:0008284//positive regulation of cell proliferation;GO:0010468//regulation of gene expression;GO:0010508//positive regulation of autophagy;GO:0016570//histone modification;GO:0018215//protein phosphopantetheinylation;GO:0030218//erythrocyte differentiation;GO:0031397//negative regu…
ENSG00000014138	6.96	7.24	6.19	7.04	6.4	6.98	7.57	6.08	258.68	398.65	368.41	343.36	445.93	359.4	413.78	390	POLA2	DNA polymerase alpha 2, accessory subunit [Source:HGNC Symbol;Acc:HGNC:30073]	Genetic Information Processing	Replication and repair	ko03030//DNA replication	K02321	GO:0005634//nucleus;GO:0005654//nucleoplasm;GO:0005658//alpha DNA polymerase:primase complex;GO:0005829//cytosol	GO:0003674//molecular_function;GO:0003677//DNA binding;GO:0005515//protein binding	GO:0000082//G1/S transition of mitotic cell cycle;GO:0006260//DNA replication;GO:0006269//DNA replication, synthesis of RNA primer;GO:0006270//DNA replication initiation;GO:0032201//telomere maintenance via semi-conservative replication
ENSG00000014164	5.12	8.17	7.85	8.24	7.82	8.74	7.64	6.78	327	620	599	579	629	762	627	572	ZC3H3	zinc finger CCCH-type containing 3 [Source:HGNC Symbol;Acc:HGNC:28972]	-	-	-	-	GO:0005634//nucleus;GO:0005847//mRNA cleavage and polyadenylation specificity factor complex	GO:0003674//molecular_function;GO:0003677//DNA binding;GO:0046332//SMAD binding;GO:0046872//metal ion binding;GO:0070412//R-SMAD binding	GO:0031124//mRNA 3'-end processing;GO:0032927//positive regulation of activin receptor signaling pathway;GO:0051028//mRNA transport;GO:1900363//regulation of mRNA polyadenylation
ENSG00000014216	25.63	43.57	39.57	43.78	42.69	41.94	41.41	41.3	1468	2743	2674	2671	3079	2913	2664	2935	CAPN1	calpain 1 [Source:HGNC Symbol;Acc:HGNC:1476]	Human Diseases;Human Diseases;Genetic Information Processing;Cellular Processes;Cellular Processes;Cellular Processes	Neurodegenerative diseases;Infectious diseases;Folding, sorting and degradation;Cell growth and death;Cell growth and death;Cell growth and death	ko05010//Alzheimer disease;ko05131//Shigellosis;ko04141//Protein processing in endoplasmic reticulum;ko04217//Necroptosis;ko04218//Cellular senescence;ko04210//Apoptosis	K01367;K01367;K01367;K01367;K01367;K01367	GO:0005576//extracellular region;GO:0005737//cytoplasm;GO:0005739//mitochondrion;GO:0005764//lysosome;GO:0005829//cytosol;GO:0005886//plasma membrane;GO:0005925//focal adhesion;GO:0016020//membrane;GO:0070062//extracellular exosome;GO:1904813//ficolin-1-rich granule lumen	GO:0004198//calcium-dependent cysteine-type endopeptidase activity;GO:0005509//calcium ion binding;GO:0005515//protein binding;GO:0008233//peptidase activity;GO:0008234//cysteine-type peptidase activity;GO:0016787//hydrolase activity;GO:0046872//metal ion binding	GO:0006508//proteolysis;GO:0008284//positive regulation of cell proliferation;GO:0016241//regulation of macroautophagy;GO:0022617//extracellular matrix disassembly;GO:0032801//receptor catabolic process;GO:0043312//neutrophil degranulation;GO:0050790//regulation of catalytic activity;GO:0060056//mammary gland involution;GO:0070268//cornification;GO:0097264//self proteolysis;GO:2000310//regulation…
ENSG00000014257	0	0	0.01	0	0	0.09	0	0	0	0	1	0	0	3	0	0	ACP3	acid phosphatase 3 [Source:HGNC Symbol;Acc:HGNC:125]	-	-	-	-	GO:0005576//extracellular region;GO:0005615//extracellular space;GO:0005634//nucleus;GO:0005764//lysosome;GO:0005765//lysosomal membrane;GO:0005886//plasma membrane;GO:0012506//vesicle membrane;GO:0016020//membrane;GO:0016021//integral component of membrane;GO:0030175//filopodium;GO:0035577//azurophil granule membrane;GO:0070062//extracellular exosome	GO:0003993//acid phosphatase activity;GO:0005515//protein binding;GO:0008253//5'-nucleotidase activity;GO:0016787//hydrolase activity;GO:0016791//phosphatase activity;GO:0042131//thiamine phosphate phosphatase activity;GO:0042802//identical protein binding;GO:0042803//protein homodimerization activity;GO:0052642//lysophosphatidic acid phosphatase activity	GO:0006144//purine nucleobase metabolic process;GO:0006772//thiamine metabolic process;GO:0007040//lysosome organization;GO:0009117//nucleotide metabolic process;GO:0016311//dephosphorylation;GO:0043312//neutrophil degranulation;GO:0046085//adenosine metabolic process;GO:0051930//regulation of sensory perception of pain;GO:0060168//positive regulation of adenosine receptor signaling pathway
ENSG00000014641	133.38	150.81	158.51	162.28	167.65	125.49	147.83	161.17	3376	4675	4766	4526	5402	4340	4814	5371	MDH1	malate dehydrogenase 1 [Source:HGNC Symbol;Acc:HGNC:6970]	Metabolism;Metabolism;Metabolism;Metabolism;Metabolism;Metabolism;Organismal Systems	Global and overview maps;Global and overview maps;Amino acid metabolism;Carbohydrate metabolism;Carbohydrate metabolism;Carbohydrate metabolism;Excretory system	ko01100//Metabolic pathways;ko01200//Carbon metabolism;ko00270//Cysteine and methionine metabolism;ko00620//Pyruvate metabolism;ko00630//Glyoxylate and dicarboxylate metabolism;ko00020//Citrate cycle (TCA cycle);ko04964//Proximal tubule bicarbonate reclamation	K00025;K00025;K00025;K00025;K00025;K00025;K00025	GO:0005615//extracellular space;GO:0005737//cytoplasm;GO:0005813//centrosome;GO:0005829//cytosol;GO:0070062//extracellular exosome	GO:0003824//catalytic activity;GO:0004470//malic enzyme activity;GO:0005515//protein binding;GO:0016491//oxidoreductase activity;GO:0016615//malate dehydrogenase activity;GO:0016616//oxidoreductase activity, acting on the CH-OH group of donors, NAD or NADP as acceptor;GO:0030060//L-malate dehydrogenase activity;GO:0047860//diiodophenylpyruvate reductase activity;GO:0051287//NAD binding	GO:0005975//carbohydrate metabolic process;GO:0006094//gluconeogenesis;GO:0006099//tricarboxylic acid cycle;GO:0006107//oxaloacetate metabolic process;GO:0006108//malate metabolic process;GO:0006734//NADH metabolic process;GO:0019674//NAD metabolic process;GO:0019752//carboxylic acid metabolic process;GO:0055114//oxidation-reduction process
ENSG00000014824	22.29	20.76	19.62	20.52	17.91	18.33	18.91	19.46	1663	1733	1578	1520	1459	1634	1587	1677	SLC30A9	solute carrier family 30 member 9 [Source:HGNC Symbol;Acc:HGNC:1329]	-	-	-	-	GO:0005634//nucleus;GO:0005737//cytoplasm;GO:0005783//endoplasmic reticulum;GO:0005856//cytoskeleton;GO:0016020//membrane;GO:0016021//integral component of membrane;GO:0031410//cytoplasmic vesicle	GO:0003682//chromatin binding;GO:0008324//cation transmembrane transporter activity;GO:0016922//nuclear receptor binding;GO:0030374//nuclear receptor transcription coactivator activity	GO:0006289//nucleotide-excision repair;GO:0006811//ion transport;GO:0006812//cation transport;GO:0006829//zinc ion transport;GO:0006882//cellular zinc ion homeostasis;GO:0045944//positive regulation of transcription by RNA polymerase II;GO:0055085//transmembrane transport;GO:0098655//cation transmembrane transport
ENSG00000014914	0.26	0.13	0.12	0.12	0.08	0.04	0.18	0.15	13	9	8	7	6	3	12	10	MTMR11	myotubularin related protein 11 [Source:HGNC Symbol;Acc:HGNC:24307]	-	-	-	-	GO:0005737//cytoplasm;GO:0070062//extracellular exosome	GO:0004438//phosphatidylinositol-3-phosphatase activity	GO:0046856//phosphatidylinositol dephosphorylation
ENSG00000014919	12.81	12.12	11.74	12.25	12.03	10.81	10.5	12.7	1061.98	1154.58	1131.4	1055.43	1126.17	1078.6	1008.62	1286.71	COX15	cytochrome c oxidase assembly homolog COX15 [Source:HGNC Symbol;Acc:HGNC:2263]	Metabolism;Organismal Systems;Metabolism;Metabolism	Global and overview maps;Environmental adaptation;Energy metabolism;Metabolism of cofactors and vitamins	ko01100//Metabolic pathways;ko04714//Thermogenesis;ko00190//Oxidative phosphorylation;ko00860//Porphyrin and chlorophyll metabolism	K02259;K02259;K02259;K02259	GO:0005654//nucleoplasm;GO:0005739//mitochondrion;GO:0005743//mitochondrial inner membrane;GO:0005746//mitochondrial respiratory chain;GO:0016020//membrane;GO:0016021//integral component of membrane;GO:0031966//mitochondrial membrane;GO:0070069//cytochrome complex	GO:0004129//cytochrome-c oxidase activity;GO:0005515//protein binding;GO:0016627//oxidoreductase activity, acting on the CH-CH group of donors;GO:0016653//oxidoreductase activity, acting on NAD(P)H, heme protein as acceptor;GO:0020037//heme binding;GO:0060090//molecular adaptor activity	GO:0006123//mitochondrial electron transport, cytochrome c to oxygen;GO:0006783//heme biosynthetic process;GO:0006784//heme a biosynthetic process;GO:0007585//respiratory gaseous exchange;GO:0008535//respiratory chain complex IV assembly;GO:0045333//cellular respiration;GO:0055114//oxidation-reduction process;GO:1902600//proton transmembrane transport
ENSG00000015133	4.01	5.77	5.59	5.73	5.25	5.7	5.16	5	519	976	897	876	943	1103	906	913	CCDC88C	coiled-coil domain containing 88C [Source:HGNC Symbol;Acc:HGNC:19967]	-	-	-	-	GO:0005737//cytoplasm;GO:0005813//centrosome;GO:0030054//cell junction	GO:0001965//G-protein alpha-subunit binding;GO:0005085//guanyl-nucleotide exchange factor activity;GO:0005109//frizzled binding;GO:0005515//protein binding;GO:0008017//microtubule binding;GO:0030165//PDZ domain binding;GO:0042802//identical protein binding;GO:0043621//protein self-association;GO:0051959//dynein light intermediate chain binding	GO:0001932//regulation of protein phosphorylation;GO:0003383//apical constriction;GO:0007264//small GTPase mediated signal transduction;GO:0016055//Wnt signaling pathway;GO:0030705//cytoskeleton-dependent intracellular transport;GO:0031098//stress-activated protein kinase signaling cascade;GO:0031122//cytoplasmic microtubule organization;GO:0031648//protein destabilization;GO:0035567//non-canonic…
ENSG00000015153	5.73	5.54	5.86	5.28	5.38	4.49	4.86	5.97	244	268	277	231	222	230	245	261	YAF2	YY1 associated factor 2 [Source:HGNC Symbol;Acc:HGNC:17363]	-	-	-	-	GO:0005634//nucleus;GO:0005654//nucleoplasm;GO:0005829//cytosol	GO:0003677//DNA binding;GO:0003712//transcription coregulator activity;GO:0003713//transcription coactivator activity;GO:0003714//transcription corepressor activity;GO:0005515//protein binding;GO:0046872//metal ion binding	GO:0006355//regulation of transcription, DNA-templated;GO:0045892//negative regulation of transcription, DNA-templated;GO:0045893//positive regulation of transcription, DNA-templated;GO:0070317//negative regulation of G0 to G1 transition
ENSG00000015171	19.5	18.29	17.83	18.99	15.83	18.12	16.49	16.72	1522	1704	1602	1511	1471	1535	1479	1610	ZMYND11	zinc finger MYND-type containing 11 [Source:HGNC Symbol;Acc:HGNC:16966]	-	-	-	-	GO:0005634//nucleus;GO:0005654//nucleoplasm;GO:0005694//chromosome;GO:0016020//membrane;GO:0016021//integral component of membrane	GO:0003677//DNA binding;GO:0003690//double-stranded DNA binding;GO:0003714//transcription corepressor activity;GO:0005515//protein binding;GO:0008270//zinc ion binding;GO:0035064//methylated histone binding;GO:0046872//metal ion binding	GO:0006325//chromatin organization;GO:0007049//cell cycle;GO:0016032//viral process;GO:0034243//regulation of transcription elongation from RNA polymerase II promoter;GO:0043124//negative regulation of I-kappaB kinase/NF-kappaB signaling;GO:0045892//negative regulation of transcription, DNA-templated;GO:0046329//negative regulation of JNK cascade;GO:0051607//defense response to virus;GO:2001237//…
ENSG00000015285	0	0	0	0.03	0.04	0.02	0.04	0.08	0	0	0	1	2	1	1	4	WAS	WASP actin nucleation promoting factor [Source:HGNC Symbol;Acc:HGNC:12731]	Organismal Systems;Cellular Processes;Organismal Systems;Human Diseases;Human Diseases;Cellular Processes	Immune system;Cellular community - eukaryotes;Immune system;Infectious disease: bacterial;Cancers;Cellular community - eukaryotes	ko04062//Chemokine signaling pathway;ko04530//Tight junction;ko04666//Fc gamma R-mediated phagocytosis;ko05135//Yersinia infection;ko05231//Choline metabolism in cancer;ko04520//Adherens junction	K05747;K05747;K05747;K05747;K05747;K05747	GO:0005634//nucleus;GO:0005737//cytoplasm;GO:0005829//cytosol;GO:0005856//cytoskeleton;GO:0005884//actin filament;GO:0005886//plasma membrane;GO:0005911//cell-cell junction;GO:0012506//vesicle membrane;GO:0015629//actin cytoskeleton;GO:0035861//site of double-strand break;GO:0045335//phagocytic vesicle;GO:0070062//extracellular exosome	GO:0003779//actin binding;GO:0005515//protein binding;GO:0017124//SH3 domain binding;GO:0019901//protein kinase binding;GO:0030695//GTPase regulator activity;GO:0031267//small GTPase binding;GO:0042802//identical protein binding;GO:0043274//phospholipase binding	GO:0002625//regulation of T cell antigen processing and presentation;GO:0006952//defense response;GO:0006955//immune response;GO:0007015//actin filament organization;GO:0007596//blood coagulation;GO:0008064//regulation of actin polymerization or depolymerization;GO:0008154//actin polymerization or depolymerization;GO:0008544//epidermis development;GO:0010591//regulation of lamellipodium assembly;…
ENSG00000015413	7.45	12.48	12.33	12.96	12.22	13.38	12.38	10.66	238	473	447	439	494	488	450	450	DPEP1	dipeptidase 1 [Source:HGNC Symbol;Acc:HGNC:3002]	-	-	-	-	GO:0005615//extracellular space;GO:0005654//nucleoplasm;GO:0005886//plasma membrane;GO:0016020//membrane;GO:0016324//apical plasma membrane;GO:0030054//cell junction;GO:0031225//anchored component of membrane;GO:0031528//microvillus membrane;GO:0042995//cell projection;GO:0045177//apical part of cell;GO:0070062//extracellular exosome	GO:0005515//protein binding;GO:0008233//peptidase activity;GO:0008235//metalloexopeptidase activity;GO:0008237//metallopeptidase activity;GO:0008270//zinc ion binding;GO:0008800//beta-lactamase activity;GO:0016787//hydrolase activity;GO:0016805//dipeptidase activity;GO:0034235//GPI anchor binding;GO:0043027//cysteine-type endopeptidase inhibitor activity involved in apoptotic process;GO:0046872//…	GO:0006508//proteolysis;GO:0006629//lipid metabolic process;GO:0006691//leukotriene metabolic process;GO:0006749//glutathione metabolic process;GO:0006751//glutathione catabolic process;GO:0006805//xenobiotic metabolic process;GO:0006915//apoptotic process;GO:0006954//inflammatory response;GO:0016999//antibiotic metabolic process;GO:0030336//negative regulation of cell migration;GO:0030593//neutr…
ENSG00000015475	17.18	18.15	18.1	17.31	17.26	17.37	16.67	16.21	408	510	500	442	508	532	511	527	BID	BH3 interacting domain death agonist [Source:HGNC Symbol;Acc:HGNC:1050]	Human Diseases;Human Diseases;Human Diseases;Human Diseases;Human Diseases;Human Diseases;Human Diseases;Organismal Systems;Human Diseases;Human Diseases;Cellular Processes;Human Diseases;Human Diseases;Human Diseases;Human Diseases;Cellular Processes;Human Diseases;Environmental Information Processing;Human Diseases;Cellular Processes;Human Diseases;Cellular Processes	Infectious diseases;Cancers;Neurodegenerative diseases;Infectious diseases;Infectious diseases;Infectious diseases;Infectious disease: viral;Immune system;Infectious diseases;Infectious diseases;Cell growth and death;Infectious diseases;Endocrine and metabolic diseases;Infectious diseases;Infectious diseases;Cell growth and death;Cardiovascular diseases;Signal transduction;Drug resistance;Cell gr…	ko05168//Herpes simplex infection;ko05200//Pathways in cancer;ko05010//Alzheimer disease;ko05169//Epstein-Barr virus infection;ko05152//Tuberculosis;ko05163//Human cytomegalovirus infection;ko05170//Human immunodeficiency virus 1 infection;ko04650//Natural killer cell mediated cytotoxicity;ko05167//Kaposi sarcoma-associated herpesvirus infection;ko05164//Influenza A;ko04217//Necroptosis;ko05161//…	K04726;K04726;K04726;K04726;K04726;K04726;K04726;K04726;K04726;K04726;K04726;K04726;K04726;K04726;K04726;K04726;K04726;K04726;K04726;K04726;K04726;K04726	GO:0005737//cytoplasm;GO:0005739//mitochondrion;GO:0005741//mitochondrial outer membrane;GO:0005829//cytosol;GO:0016020//membrane;GO:0031966//mitochondrial membrane;GO:0032592//integral component of mitochondrial membrane	GO:0005123//death receptor binding;GO:0005515//protein binding;GO:0031625//ubiquitin protein ligase binding	GO:0001836//release of cytochrome c from mitochondria;GO:0006626//protein targeting to mitochondrion;GO:0006915//apoptotic process;GO:0006919//activation of cysteine-type endopeptidase activity involved in apoptotic process;GO:0008625//extrinsic apoptotic signaling pathway via death domain receptors;GO:0008637//apoptotic mitochondrial changes;GO:0010918//positive regulation of mitochondrial membr…
ENSG00000015479	215.5	153.7	168.97	148.44	135.09	126.41	137.66	149.38	8578.3	8586.29	8993	7292.81	7606.66	7899.59	7961.82	8788.49	MATR3	matrin 3 [Source:HGNC Symbol;Acc:HGNC:6912]	-	-	-	-	GO:0005634//nucleus;GO:0005637//nuclear inner membrane;GO:0016020//membrane;GO:0016363//nuclear matrix	GO:0003676//nucleic acid binding;GO:0003723//RNA binding;GO:0003729//mRNA binding;GO:0005198//structural molecule activity;GO:0005515//protein binding;GO:0008270//zinc ion binding;GO:0035198//miRNA binding;GO:0042802//identical protein binding;GO:0046872//metal ion binding	GO:0002218//activation of innate immune response;GO:0002376//immune system process;GO:0003170//heart valve development;GO:0003281//ventricular septum development;GO:0006417//regulation of translation;GO:0010608//posttranscriptional regulation of gene expression;GO:0045087//innate immune response
ENSG00000015520	9.21	9.23	8.7	9.58	9.15	9.4	8.85	8.88	886	1094	992	999	1120	1240	1083	1080	NPC1L1	NPC1 like intracellular cholesterol transporter 1 [Source:HGNC Symbol;Acc:HGNC:7898]	Organismal Systems	Digestive system	ko04975//Fat digestion and absorption	K14461	GO:0005886//plasma membrane;GO:0016020//membrane;GO:0016021//integral component of membrane;GO:0016324//apical plasma membrane;GO:0030659//cytoplasmic vesicle membrane;GO:0031410//cytoplasmic vesicle;GO:0031526//brush border membrane;GO:0044214//spanning component of plasma membrane	GO:0005319//lipid transporter activity;GO:0005515//protein binding;GO:0008144//drug binding;GO:0031267//small GTPase binding;GO:0031489//myosin V binding	GO:0006629//lipid metabolic process;GO:0006695//cholesterol biosynthetic process;GO:0006869//lipid transport;GO:0008202//steroid metabolic process;GO:0008203//cholesterol metabolic process;GO:0014850//response to muscle activity;GO:0030299//intestinal cholesterol absorption;GO:0030301//cholesterol transport;GO:0042157//lipoprotein metabolic process;GO:0042493//response to drug;GO:0071501//cellula…
ENSG00000015532	6.59	9.56	9.84	9.52	14.01	14.28	13.28	11.51	434	736	724	652	1064	1213	1061	960	XYLT2	xylosyltransferase 2 [Source:HGNC Symbol;Acc:HGNC:15517]	Metabolism;Metabolism;Metabolism	Global and overview maps;Glycan biosynthesis and metabolism;Glycan biosynthesis and metabolism	ko01100//Metabolic pathways;ko00534//Glycosaminoglycan biosynthesis - heparan sulfate / heparin;ko00532//Glycosaminoglycan biosynthesis - chondroitin sulfate / dermatan sulfate	K00771;K00771;K00771	GO:0000139//Golgi membrane;GO:0005576//extracellular region;GO:0005615//extracellular space;GO:0005794//Golgi apparatus;GO:0016020//membrane;GO:0016021//integral component of membrane	GO:0000287//magnesium ion binding;GO:0016740//transferase activity;GO:0016757//transferase activity, transferring glycosyl groups;GO:0030145//manganese ion binding;GO:0030158//protein xylosyltransferase activity;GO:0046872//metal ion binding	GO:0006024//glycosaminoglycan biosynthetic process;GO:0015012//heparan sulfate proteoglycan biosynthetic process;GO:0018215//protein phosphopantetheinylation;GO:0030166//proteoglycan biosynthetic process;GO:0030203//glycosaminoglycan metabolic process;GO:0030206//chondroitin sulfate biosynthetic process;GO:0030210//heparin biosynthetic process;GO:0050650//chondroitin sulfate proteoglycan biosynth…
ENSG00000015568	0.45	0.86	1.05	8.99	5.33	3.18	0.04	3.95	15.25	73.7	23.85	1190.57	905.65	401.89	3.06	642.92	RGPD5	RANBP2 like and GRIP domain containing 5 [Source:HGNC Symbol;Acc:HGNC:32418]	-	-	-	-	GO:0005643//nuclear pore;GO:0005737//cytoplasm	GO:0005096//GTPase activator activity;GO:0005515//protein binding;GO:0031267//small GTPase binding	GO:0006607//NLS-bearing protein import into nucleus;GO:0043547//positive regulation of GTPase activity;GO:0046907//intracellular transport
ENSG00000015592	0	0	0	0	0	0	0	0	0	0	0	0	0	0	0	0	STMN4	stathmin 4 [Source:HGNC Symbol;Acc:HGNC:16078]	-	-	-	-	GO:0005737//cytoplasm;GO:0005794//Golgi apparatus;GO:0030424//axon;GO:0030426//growth cone;GO:0042995//cell projection;GO:0043005//neuron projection	GO:0005515//protein binding;GO:0015631//tubulin binding	GO:0007019//microtubule depolymerization;GO:0031110//regulation of microtubule polymerization or depolymerization;GO:0031175//neuron projection development
ENSG00000015676	3.74	5.38	5.2	5.04	5.87	4.98	4.97	5.39	586	1034	976	871	1179	1068	1002	1116	NUDCD3	NudC domain containing 3 [Source:HGNC Symbol;Acc:HGNC:22208]	-	-	-	-	GO:0005737//cytoplasm;GO:0005868//cytoplasmic dynein complex	GO:0005515//protein binding;GO:0051082//unfolded protein binding	GO:0006457//protein folding;GO:0032502//developmental process;GO:0060271//cilium assembly;GO:1905793//protein localization to pericentriolar material
ENSG00000016082	0	0	0	0.02	0	0.02	0	0	0	0	0	1	0	1	0	0	ISL1	ISL LIM homeobox 1 [Source:HGNC Symbol;Acc:HGNC:6132]	Cellular Processes	Cellular community - eukaryotes	ko04550//Signaling pathways regulating pluripotency of stem cells	K09370	GO:0000785//chromatin;GO:0005634//nucleus;GO:0005737//cytoplasm	GO:0000978//RNA polymerase II proximal promoter sequence-specific DNA binding;GO:0000981//DNA-binding transcription factor activity, RNA polymerase II-specific;GO:0000987//proximal promoter sequence-specific DNA binding;GO:0001102//RNA polymerase II activating transcription factor binding;GO:0001228//DNA-binding transcription activator activity, RNA polymerase II-specific;GO:0003677//DNA binding;…	GO:0000122//negative regulation of transcription by RNA polymerase II;GO:0001755//neural crest cell migration;GO:0003007//heart morphogenesis;GO:0003139//secondary heart field specification;GO:0003148//outflow tract septum morphogenesis;GO:0003151//outflow tract morphogenesis;GO:0003203//endocardial cushion morphogenesis;GO:0003215//cardiac right ventricle morphogenesis;GO:0003266//regulation of …
ENSG00000016391	13.39	35.58	30.78	32.75	39.83	43.06	37.63	33.75	1618	3122	2959.99	2956.99	3613.18	3732	3466.87	3539.99	CHDH	choline dehydrogenase [Source:HGNC Symbol;Acc:HGNC:24288]	Metabolism;Metabolism	Global and overview maps;Amino acid metabolism	ko01100//Metabolic pathways;ko00260//Glycine, serine and threonine metabolism	K00108;K00108	GO:0005739//mitochondrion;GO:0005743//mitochondrial inner membrane;GO:0016020//membrane	GO:0005515//protein binding;GO:0008812//choline dehydrogenase activity;GO:0016491//oxidoreductase activity;GO:0016614//oxidoreductase activity, acting on CH-OH group of donors;GO:0050660//flavin adenine dinucleotide binding	GO:0019285//glycine betaine biosynthetic process from choline;GO:0042426//choline catabolic process;GO:0055114//oxidation-reduction process
ENSG00000016402	0	0.01	0	0	0	0	0	0	0	1	0	0	0	0	0	0	IL20RA	interleukin 20 receptor subunit alpha [Source:HGNC Symbol;Acc:HGNC:6003]	Environmental Information Processing;Environmental Information Processing;Environmental Information Processing	Signaling molecules and interaction;Signal transduction;Signaling molecules and interaction	ko04060//Cytokine-cytokine receptor interaction;ko04630//Jak-STAT signaling pathway;ko04061//Viral protein interaction with cytokine and cytokine receptor	K05136;K05136;K05136	GO:0005886//plasma membrane;GO:0016020//membrane;GO:0016021//integral component of membrane	GO:0004896//cytokine receptor activity;GO:0005515//protein binding;GO:0042015//interleukin-20 binding	GO:0019221//cytokine-mediated signaling pathway;GO:0045124//regulation of bone resorption;GO:2001244//positive regulation of intrinsic apoptotic signaling pathway
ENSG00000016490	0	0	0	0	0	0	0	0	0	0	0	0	0	0	0	0	CLCA1	chloride channel accessory 1 [Source:HGNC Symbol;Acc:HGNC:2015]	Organismal Systems;Organismal Systems	Digestive system;Endocrine system	ko04972//Pancreatic secretion;ko04924//Renin secretion	K05027;K05027	GO:0005576//extracellular region;GO:0005615//extracellular space;GO:0005886//plasma membrane;GO:0005887//integral component of plasma membrane;GO:0005902//microvillus;GO:0016020//membrane;GO:0016021//integral component of membrane;GO:0030141//secretory granule;GO:0042589//zymogen granule membrane	GO:0005229//intracellular calcium activated chloride channel activity;GO:0005254//chloride channel activity;GO:0008233//peptidase activity;GO:0008237//metallopeptidase activity;GO:0016787//hydrolase activity;GO:0046872//metal ion binding	GO:0006508//proteolysis;GO:0006811//ion transport;GO:0006816//calcium ion transport;GO:0006821//chloride transport;GO:0034220//ion transmembrane transport;GO:0071456//cellular response to hypoxia;GO:1902476//chloride transmembrane transport
ENSG00000016602	0	0.27	0.12	0.09	0.19	0.08	0.05	0	0	21	9	6	15	7	4	0	CLCA4	chloride channel accessory 4 [Source:HGNC Symbol;Acc:HGNC:2018]	Organismal Systems;Organismal Systems	Digestive system;Endocrine system	ko04972//Pancreatic secretion;ko04924//Renin secretion	K05030;K05030	GO:0005576//extracellular region;GO:0005886//plasma membrane;GO:0005887//integral component of plasma membrane;GO:0016020//membrane;GO:0016021//integral component of membrane;GO:0016324//apical plasma membrane	GO:0005229//intracellular calcium activated chloride channel activity;GO:0005254//chloride channel activity;GO:0008233//peptidase activity;GO:0008237//metallopeptidase activity;GO:0016787//hydrolase activity;GO:0046872//metal ion binding	GO:0006508//proteolysis;GO:0006821//chloride transport;GO:0034220//ion transmembrane transport;GO:1902476//chloride transmembrane transport
ENSG00000016864	45.79	40.63	42.03	38.75	43.09	44.75	42.71	43.7	1269	1390	1371	1288	1598	1609	1432	1691	GLT8D1	glycosyltransferase 8 domain containing 1 [Source:HGNC Symbol;Acc:HGNC:24870]	-	-	-	-	GO:0005794//Golgi apparatus;GO:0016020//membrane;GO:0016021//integral component of membrane	GO:0016740//transferase activity;GO:0016757//transferase activity, transferring glycosyl groups	-
ENSG00000017260	22.83	20.57	20.85	20.72	20.63	17.44	19.34	21.54	1405	1738.84	1798	1627.82	1805	1533.83	1634.82	1969.55	ATP2C1	ATPase secretory pathway Ca2+ transporting 1 [Source:HGNC Symbol;Acc:HGNC:13211]	-	-	-	-	GO:0000139//Golgi membrane;GO:0005783//endoplasmic reticulum;GO:0005794//Golgi apparatus;GO:0005802//trans-Golgi network;GO:0005886//plasma membrane;GO:0016020//membrane;GO:0016021//integral component of membrane	GO:0000166//nucleotide binding;GO:0005388//calcium-transporting ATPase activity;GO:0005509//calcium ion binding;GO:0005524//ATP binding;GO:0008553//proton-exporting ATPase activity, phosphorylative mechanism;GO:0015410//manganese-transporting ATPase activity;GO:0016887//ATPase activity;GO:0046872//metal ion binding	GO:0006811//ion transport;GO:0006816//calcium ion transport;GO:0006828//manganese ion transport;GO:0006874//cellular calcium ion homeostasis;GO:0008544//epidermis development;GO:0016339//calcium-dependent cell-cell adhesion via plasma membrane cell adhesion molecules;GO:0031532//actin cytoskeleton reorganization;GO:0032468//Golgi calcium ion homeostasis;GO:0032472//Golgi calcium ion transport;GO:…
ENSG00000017427	0	0.01	0.01	0	0.01	0.01	0.02	0.01	0	2	1	0	2	2	3	1	IGF1	insulin like growth factor 1 [Source:HGNC Symbol;Acc:HGNC:5464]	Human Diseases;Environmental Information Processing;Environmental Information Processing;Human Diseases;Environmental Information Processing;Environmental Information Processing;Human Diseases;Cellular Processes;Human Diseases;Environmental Information Processing;Human Diseases;Cellular Processes;Environmental Information Processing;Cellular Processes;Environmental Information Processing;Organism…	Cancers;Signal transduction;Signal transduction;Cancers;Signal transduction;Signal transduction;Cancers;Cellular community - eukaryotes;Cardiovascular diseases;Signal transduction;Cancers;Cellular community - eukaryotes;Signal transduction;Cell growth and death;Signal transduction;Endocrine system;Signal transduction;Endocrine system;Drug resistance;Sensory system;Cancers;Aging;Cardiovascular dis…	ko05200//Pathways in cancer;ko04151//PI3K-Akt signaling pathway;ko04010//MAPK signaling pathway;ko05202//Transcriptional misregulation in cancers;ko04014//Ras signaling pathway;ko04015//Rap1 signaling pathway;ko05205//Proteoglycans in cancer;ko04510//Focal adhesion;ko05414//Dilated cardiomyopathy (DCM);ko04150//mTOR signaling pathway;ko05224//Breast cancer;ko04550//Signaling pathways regulating p…	K05459;K05459;K05459;K05459;K05459;K05459;K05459;K05459;K05459;K05459;K05459;K05459;K05459;K05459;K05459;K05459;K05459;K05459;K05459;K05459;K05459;K05459;K05459;K05459;K05459;K05459;K05459;K05459;K05459;K05459;K05459	GO:0005576//extracellular region;GO:0005615//extracellular space;GO:0016942//insulin-like growth factor binding protein complex;GO:0031093//platelet alpha granule lumen;GO:0035867//alphav-beta3 integrin-IGF-1-IGF1R complex;GO:0042567//insulin-like growth factor ternary complex;GO:0070382//exocytic vesicle	GO:0005158//insulin receptor binding;GO:0005159//insulin-like growth factor receptor binding;GO:0005178//integrin binding;GO:0005179//hormone activity;GO:0005515//protein binding;GO:0008083//growth factor activity	GO:0000187//activation of MAPK activity;GO:0001501//skeletal system development;GO:0001775//cell activation;GO:0002576//platelet degranulation;GO:0007165//signal transduction;GO:0007265//Ras protein signal transduction;GO:0007517//muscle organ development;GO:0008283//cell proliferation;GO:0008284//positive regulation of cell proliferation;GO:0009408//response to heat;GO:0009441//glycolate metabol…
ENSG00000017483	20.42	28.67	26.72	26.78	28.21	28.78	26.68	24.89	773	1131	1021	942	1142	1320	1122	1088	SLC38A5	solute carrier family 38 member 5 [Source:HGNC Symbol;Acc:HGNC:18070]	Organismal Systems	Nervous system	ko04727//GABAergic synapse	K14992	GO:0005886//plasma membrane;GO:0005887//integral component of plasma membrane;GO:0016020//membrane;GO:0016021//integral component of membrane	GO:0005290//L-histidine transmembrane transporter activity;GO:0015171//amino acid transmembrane transporter activity;GO:0015182//L-asparagine transmembrane transporter activity;GO:0015186//L-glutamine transmembrane transporter activity;GO:0015187//glycine transmembrane transporter activity;GO:0015194//L-serine transmembrane transporter activity;GO:0022858//alanine transmembrane transporter activi…	GO:0003333//amino acid transmembrane transport;GO:0006865//amino acid transport;GO:0006867//asparagine transport;GO:0006868//glutamine transport;GO:0015816//glycine transport;GO:0015825//L-serine transport;GO:0032329//serine transport;GO:0089709//L-histidine transmembrane transport;GO:1903713//asparagine transmembrane transport;GO:1904557//L-alanine transmembrane transport
ENSG00000017797	17.15	17.65	16.16	16.36	16.4	17.74	17.35	17.37	1387	1665	1606	1503	1770	1898	1782	1870	RALBP1	ralA binding protein 1 [Source:HGNC Symbol;Acc:HGNC:9841]	Human Diseases;Environmental Information Processing;Human Diseases	Cancers;Signal transduction;Cancers	ko05200//Pathways in cancer;ko04014//Ras signaling pathway;ko05212//Pancreatic cancer	K08773;K08773;K08773	GO:0005829//cytosol;GO:0016020//membrane	GO:0005096//GTPase activator activity;GO:0005515//protein binding;GO:0017160//Ral GTPase binding;GO:0022857//transmembrane transporter activity;GO:0031267//small GTPase binding;GO:0042626//ATPase activity, coupled to transmembrane movement of substances;GO:0042910//xenobiotic transmembrane transporter activity	GO:0006897//endocytosis;GO:0006935//chemotaxis;GO:0007165//signal transduction;GO:0007264//small GTPase mediated signal transduction;GO:0043087//regulation of GTPase activity;GO:0043547//positive regulation of GTPase activity;GO:0051056//regulation of small GTPase mediated signal transduction;GO:0055085//transmembrane transport;GO:1900753//doxorubicin transport;GO:1990961//drug transmembrane expo…
ENSG00000018189	5.42	6.16	5.4	6.64	6.62	5.88	5.37	6.14	343	418	382	346	360	371	355	378	RUFY3	RUN and FYVE domain containing 3 [Source:HGNC Symbol;Acc:HGNC:30285]	-	-	-	-	GO:0005737//cytoplasm;GO:0005829//cytosol;GO:0012505//endomembrane system;GO:0016020//membrane;GO:0030027//lamellipodium;GO:0030054//cell junction;GO:0030175//filopodium;GO:0030424//axon;GO:0030425//dendrite;GO:0030426//growth cone;GO:0042995//cell projection;GO:0043025//neuronal cell body;GO:0043204//perikaryon;GO:0071437//invadopodium	GO:0005515//protein binding;GO:0046872//metal ion binding	GO:0007015//actin filament organization;GO:0007275//multicellular organism development;GO:0007399//nervous system development;GO:0030154//cell differentiation;GO:0030335//positive regulation of cell migration;GO:0045773//positive regulation of axon extension;GO:0050770//regulation of axonogenesis;GO:0050771//negative regulation of axonogenesis;GO:0090316//positive regulation of intracellular prot…
ENSG00000018236	0	0	0	0.03	0	0.01	0	0	0	0	0	2	0	1	0	0	CNTN1	contactin 1 [Source:HGNC Symbol;Acc:HGNC:2171]	Environmental Information Processing	Signaling molecules and interaction	ko04514//Cell adhesion molecules (CAMs)	K06759	GO:0005886//plasma membrane;GO:0016020//membrane;GO:0031225//anchored component of membrane;GO:0045121//membrane raft;GO:0070062//extracellular exosome;GO:0099025//anchored component of postsynaptic membrane;GO:0099026//anchored component of presynaptic membrane	GO:0005515//protein binding;GO:0030246//carbohydrate binding	GO:0007155//cell adhesion;GO:0007219//Notch signaling pathway;GO:0007399//nervous system development;GO:0010628//positive regulation of gene expression;GO:0010765//positive regulation of sodium ion transport;GO:0010976//positive regulation of neuron projection development;GO:0021549//cerebellum development;GO:0031175//neuron projection development;GO:0050731//positive regulation of peptidyl-tyros…
ENSG00000018280	0.07	0.24	0.12	0.19	0.41	0.42	0.28	0.19	4	21	10	15	37	30	25	18	SLC11A1	solute carrier family 11 member 1 [Source:HGNC Symbol;Acc:HGNC:10907]	Cellular Processes	Transport and catabolism	ko04142//Lysosome	K12347	GO:0005575//cellular_component;GO:0005764//lysosome;GO:0005770//late endosome;GO:0005886//plasma membrane;GO:0005887//integral component of plasma membrane;GO:0010008//endosome membrane;GO:0016020//membrane;GO:0016021//integral component of membrane;GO:0030670//phagocytic vesicle membrane;GO:0031902//late endosome membrane;GO:0070821//tertiary granule membrane;GO:0101003//ficolin-1-rich granule m…	GO:0003674//molecular_function;GO:0005381//iron ion transmembrane transporter activity;GO:0005384//manganese ion transmembrane transporter activity;GO:0015086//cadmium ion transmembrane transporter activity;GO:0042803//protein homodimerization activity;GO:0046873//metal ion transmembrane transporter activity;GO:0046915//transition metal ion transmembrane transporter activity;GO:0051139//metal ion…	GO:0001818//negative regulation of cytokine production;GO:0001819//positive regulation of cytokine production;GO:0002309//T cell proliferation involved in immune response;GO:0002606//positive regulation of dendritic cell antigen processing and presentation;GO:0002827//positive regulation of T-helper 1 type immune response;GO:0006811//ion transport;GO:0006826//iron ion transport;GO:0006828//mangan…
ENSG00000018408	33.88	29.53	29.12	28.95	32.55	35.41	33.22	30.89	2115	2383	2410	2145	2458	2741	2540	2778	WWTR1	WW domain containing transcription regulator 1 [Source:HGNC Symbol;Acc:HGNC:24042]	Environmental Information Processing;Environmental Information Processing	Signal transduction;Signal transduction	ko04390//Hippo signaling pathway;ko04392//Hippo signaling pathway - multiple species	K16820;K16820	GO:0005634//nucleus;GO:0005654//nucleoplasm;GO:0005667//transcription factor complex;GO:0005737//cytoplasm;GO:0005829//cytosol;GO:0005886//plasma membrane;GO:0016020//membrane;GO:0016604//nuclear body	GO:0003713//transcription coactivator activity;GO:0003714//transcription corepressor activity;GO:0005515//protein binding;GO:0042803//protein homodimerization activity	GO:0000122//negative regulation of transcription by RNA polymerase II;GO:0001649//osteoblast differentiation;GO:0001894//tissue homeostasis;GO:0001933//negative regulation of protein phosphorylation;GO:0003015//heart process;GO:0006355//regulation of transcription, DNA-templated;GO:0006367//transcription initiation from RNA polymerase II promoter;GO:0006469//negative regulation of protein kinase …
ENSG00000018510	75.22	74.59	69.7	70.25	70.99	68.36	73.25	73.87	4899	5301	5038	4530.12	5078	4879	5090.1	5662	AGPS	alkylglycerone phosphate synthase [Source:HGNC Symbol;Acc:HGNC:327]	Metabolism;Cellular Processes;Metabolism	Global and overview maps;Transport and catabolism;Lipid metabolism	ko01100//Metabolic pathways;ko04146//Peroxisome;ko00565//Ether lipid metabolism	K00803;K00803;K00803	GO:0005730//nucleolus;GO:0005739//mitochondrion;GO:0005777//peroxisome;GO:0005778//peroxisomal membrane;GO:0005782//peroxisomal matrix;GO:0005829//cytosol;GO:0016020//membrane	GO:0003824//catalytic activity;GO:0005515//protein binding;GO:0008609//alkylglycerone-phosphate synthase activity;GO:0016491//oxidoreductase activity;GO:0016740//transferase activity;GO:0050660//flavin adenine dinucleotide binding;GO:0071949//FAD binding	GO:0006625//protein targeting to peroxisome;GO:0006629//lipid metabolic process;GO:0008610//lipid biosynthetic process;GO:0008611//ether lipid biosynthetic process;GO:0055114//oxidation-reduction process
ENSG00000018610	6.75	8.56	8.37	6.49	5.93	5.67	6.21	6.18	290	415	430	321	341	329	342	367	CXorf56	chromosome X open reading frame 56 [Source:HGNC Symbol;Acc:HGNC:26239]	-	-	-	-	GO:0005634//nucleus;GO:0005737//cytoplasm;GO:0044297//cell body	GO:0005515//protein binding	-
ENSG00000018625	0.05	0.01	0	0.01	0.04	0.01	0.03	0	4	1	0	1	5	2	3	0	ATP1A2	ATPase Na+/K+ transporting subunit alpha 2 [Source:HGNC Symbol;Acc:HGNC:800]	Environmental Information Processing;Environmental Information Processing;Organismal Systems;Organismal Systems;Organismal Systems;Organismal Systems;Organismal Systems;Organismal Systems;Organismal Systems;Organismal Systems;Organismal Systems;Organismal Systems;Organismal Systems;Organismal Systems;Organismal Systems;Organismal Systems;Organismal Systems;Organismal Systems	Signal transduction;Signal transduction;Circulatory system;Endocrine system;Digestive system;Endocrine system;Digestive system;Digestive system;Circulatory system;Endocrine system;Digestive system;Endocrine system;Digestive system;Digestive system;Excretory system;Digestive system;Excretory system;Excretory system	ko04024//cAMP signaling pathway;ko04022//cGMP - PKG signaling pathway;ko04261//Adrenergic signaling in cardiomyocytes;ko04919//Thyroid hormone signaling pathway;ko04972//Pancreatic secretion;ko04925//Aldosterone synthesis and secretion;ko04974//Protein digestion and absorption;ko04970//Salivary secretion;ko04260//Cardiac muscle contraction;ko04911//Insulin secretion;ko04971//Gastric acid secretio…	K01539;K01539;K01539;K01539;K01539;K01539;K01539;K01539;K01539;K01539;K01539;K01539;K01539;K01539;K01539;K01539;K01539;K01539	GO:0005737//cytoplasm;GO:0005768//endosome;GO:0005886//plasma membrane;GO:0005890//sodium:potassium-exchanging ATPase complex;GO:0005901//caveola;GO:0014704//intercalated disc;GO:0016020//membrane;GO:0016021//integral component of membrane;GO:0030315//T-tubule;GO:0031090//organelle membrane;GO:0042383//sarcolemma;GO:0042995//cell projection;GO:0043005//neuron projection;GO:0043025//neuronal cell …	GO:0000166//nucleotide binding;GO:0005391//sodium:potassium-exchanging ATPase activity;GO:0005496//steroid binding;GO:0005515//protein binding;GO:0005524//ATP binding;GO:0008556//potassium-transporting ATPase activity;GO:0016791//phosphatase activity;GO:0016887//ATPase activity;GO:0019829//cation-transporting ATPase activity;GO:0030955//potassium ion binding;GO:0031402//sodium ion binding;GO:0046…	GO:0001504//neurotransmitter uptake;GO:0001662//behavioral fear response;GO:0002026//regulation of the force of heart contraction;GO:0002087//regulation of respiratory gaseous exchange by neurological system process;GO:0006811//ion transport;GO:0006813//potassium ion transport;GO:0006814//sodium ion transport;GO:0006883//cellular sodium ion homeostasis;GO:0006937//regulation of muscle contraction…
ENSG00000018699	18.78	16.83	18.27	18.02	15.7	13.13	15.19	16.71	1033	1152	1184	1096	1133	1011	1044	1216	TTC27	tetratricopeptide repeat domain 27 [Source:HGNC Symbol;Acc:HGNC:25986]	-	-	-	-	GO:0005575//cellular_component	GO:0003674//molecular_function;GO:0005515//protein binding	GO:0008150//biological_process
ENSG00000018869	0.25	0.33	0.6	0.24	0.25	0.31	0.26	0.29	14	12	18	12	9	15	12	18	ZNF582	zinc finger protein 582 [Source:HGNC Symbol;Acc:HGNC:26421]	Human Diseases	Infectious diseases	ko05168//Herpes simplex infection	K09228	GO:0000785//chromatin;GO:0005634//nucleus	GO:0000977//RNA polymerase II regulatory region sequence-specific DNA binding;GO:0000981//DNA-binding transcription factor activity, RNA polymerase II-specific;GO:0001227//DNA-binding transcription repressor activity, RNA polymerase II-specific;GO:0003676//nucleic acid binding;GO:0003677//DNA binding;GO:0046872//metal ion binding	GO:0000122//negative regulation of transcription by RNA polymerase II;GO:0006355//regulation of transcription, DNA-templated;GO:0006357//regulation of transcription by RNA polymerase II
ENSG00000019102	1.15	1.4	1.11	0.84	1.13	1.48	1.36	1.27	26	39	30	21	33	46	40	38	VSIG2	V-set and immunoglobulin domain containing 2 [Source:HGNC Symbol;Acc:HGNC:17149]	-	-	-	-	GO:0005887//integral component of plasma membrane;GO:0016020//membrane;GO:0016021//integral component of membrane	-	-
ENSG00000019144	3.81	5.01	5.49	5.14	4.91	5.04	5.53	4.36	362.61	626	626.83	550.4	635.02	695.23	717	574	PHLDB1	pleckstrin homology like domain family B member 1 [Source:HGNC Symbol;Acc:HGNC:23697]	-	-	-	-	GO:0045180//basal cortex	GO:0005515//protein binding	GO:0010470//regulation of gastrulation;GO:0010717//regulation of epithelial to mesenchymal transition;GO:0070507//regulation of microtubule cytoskeleton organization;GO:1904261//positive regulation of basement membrane assembly involved in embryonic body morphogenesis
ENSG00000019169	0	0	0	0	0	0	0	0	0	0	0	0	0	0	0	0	MARCO	macrophage receptor with collagenous structure [Source:HGNC Symbol;Acc:HGNC:6895]	Cellular Processes	Transport and catabolism	ko04145//Phagosome	K13884	GO:0005581//collagen trimer;GO:0005737//cytoplasm;GO:0005886//plasma membrane;GO:0005887//integral component of plasma membrane;GO:0016020//membrane;GO:0016021//integral component of membrane;GO:0030666//endocytic vesicle membrane	GO:0001540//amyloid-beta binding;GO:0001664//G protein-coupled receptor binding;GO:0004888//transmembrane signaling receptor activity;GO:0005044//scavenger receptor activity;GO:0038024//cargo receptor activity;GO:0038187//pattern recognition receptor activity	GO:0001934//positive regulation of protein phosphorylation;GO:0002376//immune system process;GO:0006897//endocytosis;GO:0006898//receptor-mediated endocytosis;GO:0006911//phagocytosis, engulfment;GO:0007166//cell surface receptor signaling pathway;GO:0007193//adenylate cyclase-inhibiting G protein-coupled receptor signaling pathway;GO:0043277//apoptotic cell clearance;GO:0045087//innate immune re…
ENSG00000019186	4.87	4.82	4.42	4.36	4.49	4.41	4.34	4.38	294	367	326	298	353	379	349	348	CYP24A1	cytochrome P450 family 24 subfamily A member 1 [Source:HGNC Symbol;Acc:HGNC:2602]	Metabolism;Human Diseases;Organismal Systems;Metabolism	Global and overview maps;Cancers;Endocrine system;Lipid metabolism	ko01100//Metabolic pathways;ko05206//MicroRNAs in cancer;ko04928//Parathyroid hormone synthesis, secretion and action;ko00100//Steroid biosynthesis	K07436;K07436;K07436;K07436	GO:0005654//nucleoplasm;GO:0005739//mitochondrion;GO:0005741//mitochondrial outer membrane	GO:0004497//monooxygenase activity;GO:0005506//iron ion binding;GO:0008403//25-hydroxycholecalciferol-24-hydroxylase activity;GO:0016491//oxidoreductase activity;GO:0016705//oxidoreductase activity, acting on paired donors, with incorporation or reduction of molecular oxygen;GO:0020037//heme binding;GO:0030342//1-alpha,25-dihydroxyvitamin D3 24-hydroxylase activity;GO:0046872//metal ion binding;G…	GO:0001649//osteoblast differentiation;GO:0006766//vitamin metabolic process;GO:0010430//fatty acid omega-oxidation;GO:0033280//response to vitamin D;GO:0042359//vitamin D metabolic process;GO:0042369//vitamin D catabolic process;GO:0055114//oxidation-reduction process;GO:0070561//vitamin D receptor signaling pathway
ENSG00000019485	1.92	2.74	2.19	2.63	2.39	2.77	2.23	2.21	201	303	248	288	328	312	299	367	PRDM11	PR/SET domain 11 [Source:HGNC Symbol;Acc:HGNC:13996]	-	-	-	-	GO:0005634//nucleus;GO:0005737//cytoplasm;GO:0005829//cytosol	GO:0003682//chromatin binding;GO:0005515//protein binding;GO:0008168//methyltransferase activity;GO:0016740//transferase activity	GO:0010468//regulation of gene expression;GO:0030308//negative regulation of cell growth;GO:0032259//methylation;GO:0043408//regulation of MAPK cascade;GO:0045892//negative regulation of transcription, DNA-templated;GO:0045893//positive regulation of transcription, DNA-templated;GO:0051726//regulation of cell cycle;GO:2000271//positive regulation of fibroblast apoptotic process
ENSG00000019505	0.01	0.05	0.02	0.04	0.01	0.01	0.03	0	1	6	2	4	1	1	2	0	SYT13	synaptotagmin 13 [Source:HGNC Symbol;Acc:HGNC:14962]	-	-	-	-	GO:0005886//plasma membrane;GO:0005887//integral component of plasma membrane;GO:0016020//membrane;GO:0016021//integral component of membrane;GO:0030133//transport vesicle;GO:0030424//axon;GO:0043231//intracellular membrane-bounded organelle;GO:0045202//synapse;GO:0070382//exocytic vesicle	GO:0000149//SNARE binding;GO:0001786//phosphatidylserine binding;GO:0005509//calcium ion binding;GO:0005544//calcium-dependent phospholipid binding;GO:0030276//clathrin binding	GO:0006906//vesicle fusion;GO:0014059//regulation of dopamine secretion;GO:0016192//vesicle-mediated transport;GO:0017156//calcium ion regulated exocytosis;GO:0017158//regulation of calcium ion-dependent exocytosis;GO:0071277//cellular response to calcium ion
ENSG00000019549	0.02	0.12	0.1	0	0	0.03	0.04	0.04	1	6	3	0	0	2	2	2	SNAI2	snail family transcriptional repressor 2 [Source:HGNC Symbol;Acc:HGNC:11094]	Environmental Information Processing;Cellular Processes	Signal transduction;Cellular community - eukaryotes	ko04390//Hippo signaling pathway;ko04520//Adherens junction	K05706;K05706	GO:0000785//chromatin;GO:0005634//nucleus;GO:0005654//nucleoplasm;GO:0005737//cytoplasm	GO:0000977//RNA polymerase II regulatory region sequence-specific DNA binding;GO:0000978//RNA polymerase II proximal promoter sequence-specific DNA binding;GO:0000981//DNA-binding transcription factor activity, RNA polymerase II-specific;GO:0001227//DNA-binding transcription repressor activity, RNA polymerase II-specific;GO:0003677//DNA binding;GO:0005515//protein binding;GO:0043565//sequence-spe…	GO:0000122//negative regulation of transcription by RNA polymerase II;GO:0001649//osteoblast differentiation;GO:0001837//epithelial to mesenchymal transition;GO:0003180//aortic valve morphogenesis;GO:0003198//epithelial to mesenchymal transition involved in endocardial cushion formation;GO:0003273//cell migration involved in endocardial cushion formation;GO:0006355//regulation of transcription, D…
ENSG00000019582	30.76	40.2	39.39	37.57	38.01	43.6	43.33	38.48	772.04	1237.02	1179.3	1036.12	1211.41	1494.08	1387.29	1266.17	CD74	CD74 molecule [Source:HGNC Symbol;Acc:HGNC:1697]	Human Diseases;Human Diseases;Organismal Systems	Infectious diseases;Infectious diseases;Immune system	ko05168//Herpes simplex infection;ko05152//Tuberculosis;ko04612//Antigen processing and presentation	K06505;K06505;K06505	GO:0000139//Golgi membrane;GO:0005634//nucleus;GO:0005737//cytoplasm;GO:0005764//lysosome;GO:0005765//lysosomal membrane;GO:0005768//endosome;GO:0005770//late endosome;GO:0005771//multivesicular body;GO:0005773//vacuole;GO:0005783//endoplasmic reticulum;GO:0005789//endoplasmic reticulum membrane;GO:0005794//Golgi apparatus;GO:0005886//plasma membrane;GO:0009897//external side of plasma membrane;G…	GO:0001540//amyloid-beta binding;GO:0004896//cytokine receptor activity;GO:0005515//protein binding;GO:0019955//cytokine binding;GO:0023026//MHC class II protein complex binding;GO:0035718//macrophage migration inhibitory factor binding;GO:0042289//MHC class II protein binding;GO:0042609//CD4 receptor binding;GO:0042658//MHC class II protein binding, via antigen binding groove;GO:0042802//identic…	GO:0000187//activation of MAPK activity;GO:0001516//prostaglandin biosynthetic process;GO:0001934//positive regulation of protein phosphorylation;GO:0001961//positive regulation of cytokine-mediated signaling pathway;GO:0002250//adaptive immune response;GO:0002286//T cell activation involved in immune response;GO:0002376//immune system process;GO:0002606//positive regulation of dendritic cell ant…
ENSG00000019991	0	0	0	0	0	0	0	0	0	0	0	0	0	0	0	0	HGF	hepatocyte growth factor [Source:HGNC Symbol;Acc:HGNC:4893]	Human Diseases;Environmental Information Processing;Environmental Information Processing;Environmental Information Processing;Environmental Information Processing;Human Diseases;Cellular Processes;Human Diseases;Human Diseases;Human Diseases;Human Diseases;Human Diseases;Human Diseases	Cancers;Signal transduction;Signal transduction;Signal transduction;Signal transduction;Cancers;Cellular community - eukaryotes;Cancers;Cancers;Drug resistance;Cancers;Cancers;Infectious diseases	ko05200//Pathways in cancer;ko04151//PI3K-Akt signaling pathway;ko04010//MAPK signaling pathway;ko04014//Ras signaling pathway;ko04015//Rap1 signaling pathway;ko05205//Proteoglycans in cancer;ko04510//Focal adhesion;ko05225//Hepatocellular carcinoma;ko05226//Gastric cancer;ko01521//EGFR tyrosine kinase inhibitor resistance;ko05218//Melanoma;ko05211//Renal cell carcinoma;ko05144//Malaria	K05460;K05460;K05460;K05460;K05460;K05460;K05460;K05460;K05460;K05460;K05460;K05460;K05460	GO:0005576//extracellular region;GO:0005615//extracellular space;GO:0016020//membrane;GO:0031093//platelet alpha granule lumen	GO:0004252//serine-type endopeptidase activity;GO:0005515//protein binding;GO:0008083//growth factor activity;GO:0042056//chemoattractant activity;GO:0042802//identical protein binding;GO:0044877//protein-containing complex binding	GO:0000165//MAPK cascade;GO:0000187//activation of MAPK activity;GO:0000278//mitotic cell cycle;GO:0000902//cell morphogenesis;GO:0001837//epithelial to mesenchymal transition;GO:0001889//liver development;GO:0001934//positive regulation of protein phosphorylation;GO:0002576//platelet degranulation;GO:0006508//proteolysis;GO:0010507//negative regulation of autophagy;GO:0014068//positive regulatio…
ENSG00000019995	6.88	6.72	7.04	6.86	6.35	5.94	6.44	6.31	764.11	915.63	936.32	839.16	903.31	902.43	921.42	926.84	ZRANB1	zinc finger RANBP2-type containing 1 [Source:HGNC Symbol;Acc:HGNC:18224]	-	-	-	-	GO:0005634//nucleus;GO:0005654//nucleoplasm;GO:0005737//cytoplasm;GO:0005829//cytosol;GO:0043231//intracellular membrane-bounded organelle	GO:0004843//thiol-dependent ubiquitin-specific protease activity;GO:0005515//protein binding;GO:0008233//peptidase activity;GO:0008234//cysteine-type peptidase activity;GO:0016787//hydrolase activity;GO:0046872//metal ion binding;GO:0070530//K63-linked polyubiquitin modification-dependent protein binding	GO:0006508//proteolysis;GO:0007010//cytoskeleton organization;GO:0016055//Wnt signaling pathway;GO:0016477//cell migration;GO:0016579//protein deubiquitination;GO:0018215//protein phosphopantetheinylation;GO:0022604//regulation of cell morphogenesis;GO:0030177//positive regulation of Wnt signaling pathway;GO:0035523//protein K29-linked deubiquitination;GO:0070536//protein K63-linked deubiquitinat…
ENSG00000020129	5.27	7.24	6.63	7.47	7.08	7.4	6.48	6.07	281	503	476	455	521	489	430	460	NCDN	neurochondrin [Source:HGNC Symbol;Acc:HGNC:17597]	-	-	-	-	GO:0005737//cytoplasm;GO:0005768//endosome;GO:0005829//cytosol;GO:0010008//endosome membrane;GO:0016020//membrane;GO:0030054//cell junction;GO:0030425//dendrite;GO:0042995//cell projection;GO:0043005//neuron projection;GO:0043025//neuronal cell body;GO:0043204//perikaryon;GO:0045202//synapse;GO:0098794//postsynapse	GO:0005515//protein binding	GO:0031175//neuron projection development;GO:0045453//bone resorption;GO:0048168//regulation of neuronal synaptic plasticity
ENSG00000020181	0.07	0.11	0.03	0.03	0.1	0.06	0.12	0.04	8.08	16.53	4.81	3.42	13.55	9.3	18.68	7.23	ADGRA2	adhesion G protein-coupled receptor A2 [Source:HGNC Symbol;Acc:HGNC:17849]	-	-	-	-	GO:0005886//plasma membrane;GO:0009986//cell surface;GO:0016020//membrane;GO:0016021//integral component of membrane;GO:0030175//filopodium;GO:0042995//cell projection;GO:1990909//Wnt signalosome	GO:0004888//transmembrane signaling receptor activity;GO:0004930//G protein-coupled receptor activity;GO:0005515//protein binding	GO:0001525//angiogenesis;GO:0002040//sprouting angiogenesis;GO:0007165//signal transduction;GO:0007166//cell surface receptor signaling pathway;GO:0007186//G protein-coupled receptor signaling pathway;GO:0007417//central nervous system development;GO:0010595//positive regulation of endothelial cell migration;GO:0016055//Wnt signaling pathway;GO:0043542//endothelial cell migration;GO:0045765//regu…
ENSG00000020256	8.85	10.37	10.26	10.93	10.68	11.38	9.85	10.26	498	722	704	694	790	873	735	769	ZFP64	ZFP64 zinc finger protein [Source:HGNC Symbol;Acc:HGNC:15940]	-	-	-	-	GO:0005634//nucleus	GO:0003677//DNA binding;GO:0005515//protein binding;GO:0046872//metal ion binding	GO:0010468//regulation of gene expression;GO:0045944//positive regulation of transcription by RNA polymerase II
ENSG00000020426	23.85	21.25	23.32	20.93	20.86	24.71	22.22	23.65	585	550	553	491	525	653	587	614	MNAT1	MNAT1 component of CDK activating kinase [Source:HGNC Symbol;Acc:HGNC:7181]	Genetic Information Processing;Genetic Information Processing	Transcription;Replication and repair	ko03022//Basal transcription factors;ko03420//Nucleotide excision repair	K10842;K10842	GO:0000439//transcription factor TFIIH core complex;GO:0005634//nucleus;GO:0005654//nucleoplasm;GO:0005675//transcription factor TFIIH holo complex;GO:0019907//cyclin-dependent protein kinase activating kinase holoenzyme complex;GO:0070516//CAK-ERCC2 complex;GO:0070985//transcription factor TFIIK complex	GO:0005515//protein binding;GO:0008270//zinc ion binding;GO:0046872//metal ion binding;GO:0047485//protein N-terminus binding;GO:0061575//cyclin-dependent protein serine/threonine kinase activator activity	GO:0000079//regulation of cyclin-dependent protein serine/threonine kinase activity;GO:0000082//G1/S transition of mitotic cell cycle;GO:0000086//G2/M transition of mitotic cell cycle;GO:0006281//DNA repair;GO:0006283//transcription-coupled nucleotide-excision repair;GO:0006289//nucleotide-excision repair;GO:0006294//nucleotide-excision repair, preincision complex assembly;GO:0006355//regulation …
ENSG00000020577	5.27	5.85	6.33	6.43	5.62	6.5	5.85	5.97	641	936	882	869	906	981	916	943	SAMD4A	sterile alpha motif domain containing 4A [Source:HGNC Symbol;Acc:HGNC:23023]	-	-	-	-	GO:0000932//P-body;GO:0001650//fibrillar center;GO:0005737//cytoplasm;GO:0005829//cytosol;GO:0030054//cell junction;GO:0030425//dendrite;GO:0042995//cell projection;GO:0043005//neuron projection;GO:0045202//synapse	GO:0003723//RNA binding;GO:0003729//mRNA binding;GO:0005515//protein binding;GO:0030371//translation repressor activity	GO:0000289//nuclear-transcribed mRNA poly(A) tail shortening;GO:0006417//regulation of translation;GO:0017148//negative regulation of translation;GO:0043488//regulation of mRNA stability;GO:0045727//positive regulation of translation
ENSG00000020633	0.24	0.61	0.45	0.28	0.65	0.47	0.58	0.47	20	56	45	25	66	54	55	45	RUNX3	RUNX family transcription factor 3 [Source:HGNC Symbol;Acc:HGNC:10473]	Human Diseases;Organismal Systems	Infectious diseases;Immune system	ko05169//Epstein-Barr virus infection;ko04658//Th1 and Th2 cell differentiation	K09279;K09279	GO:0000785//chromatin;GO:0005634//nucleus;GO:0005654//nucleoplasm;GO:0005730//nucleolus;GO:0005737//cytoplasm;GO:0005829//cytosol;GO:0016513//core-binding factor complex;GO:0043231//intracellular membrane-bounded organelle	GO:0000977//RNA polymerase II regulatory region sequence-specific DNA binding;GO:0000978//RNA polymerase II proximal promoter sequence-specific DNA binding;GO:0000981//DNA-binding transcription factor activity, RNA polymerase II-specific;GO:0003677//DNA binding;GO:0003700//DNA-binding transcription factor activity;GO:0005515//protein binding;GO:0005524//ATP binding;GO:1990837//sequence-specific d…	GO:0000122//negative regulation of transcription by RNA polymerase II;GO:0001503//ossification;GO:0002062//chondrocyte differentiation;GO:0006355//regulation of transcription, DNA-templated;GO:0006357//regulation of transcription by RNA polymerase II;GO:0006468//protein phosphorylation;GO:0030097//hemopoiesis;GO:0030182//neuron differentiation;GO:0043371//negative regulation of CD4-positive, alph…
ENSG00000020922	13.53	11.69	11.61	12.12	11.66	11.01	11.93	12.28	898	1014	1037.1	924.08	994.02	980	1017	1097	MRE11	MRE11 homolog, double strand break repair nuclease [Source:HGNC Symbol;Acc:HGNC:7230]	Cellular Processes;Genetic Information Processing;Genetic Information Processing	Cell growth and death;Replication and repair;Replication and repair	ko04218//Cellular senescence;ko03440//Homologous recombination;ko03450//Non-homologous end-joining	K10865;K10865;K10865	GO:0000781//chromosome, telomeric region;GO:0005634//nucleus;GO:0005654//nucleoplasm;GO:0005657//replication fork;GO:0005694//chromosome;GO:0005737//cytoplasm;GO:0005829//cytosol;GO:0016605//PML body;GO:0030870//Mre11 complex;GO:0035861//site of double-strand break	GO:0000014//single-stranded DNA endodeoxyribonuclease activity;GO:0003677//DNA binding;GO:0003678//DNA helicase activity;GO:0003690//double-stranded DNA binding;GO:0004518//nuclease activity;GO:0004519//endonuclease activity;GO:0004520//endodeoxyribonuclease activity;GO:0004527//exonuclease activity;GO:0005515//protein binding;GO:0008022//protein C-terminus binding;GO:0008408//3'-5' exonuclease a…	GO:0000019//regulation of mitotic recombination;GO:0000723//telomere maintenance;GO:0000724//double-strand break repair via homologous recombination;GO:0000729//DNA double-strand break processing;GO:0006260//DNA replication;GO:0006281//DNA repair;GO:0006302//double-strand break repair;GO:0006303//double-strand break repair via nonhomologous end joining;GO:0006310//DNA recombination;GO:0006974//ce…
ENSG00000021300	28.24	37.84	37.37	36.92	45.77	47.15	46.63	41.35	1033	1420	1288	1214	1691	2055	1812	1710	PLEKHB1	pleckstrin homology domain containing B1 [Source:HGNC Symbol;Acc:HGNC:19079]	-	-	-	-	GO:0005737//cytoplasm;GO:0016020//membrane;GO:0016021//integral component of membrane	GO:0005515//protein binding	GO:0007275//multicellular organism development;GO:0007602//phototransduction;GO:0045595//regulation of cell differentiation
ENSG00000021355	20.39	18.79	18.52	20.03	19.32	15.42	17.02	21.02	985	1113	1070	1066	1195	1018	1058	1342	SERPINB1	serpin family B member 1 [Source:HGNC Symbol;Acc:HGNC:3311]	-	-	-	-	GO:0005576//extracellular region;GO:0005615//extracellular space;GO:0005737//cytoplasm;GO:0016020//membrane;GO:0034774//secretory granule lumen;GO:0036464//cytoplasmic ribonucleoprotein granule;GO:0062023//collagen-containing extracellular matrix;GO:0070062//extracellular exosome	GO:0004867//serine-type endopeptidase inhibitor activity;GO:0005515//protein binding;GO:0030414//peptidase inhibitor activity	GO:0010466//negative regulation of peptidase activity;GO:0010951//negative regulation of endopeptidase activity;GO:0032691//negative regulation of interleukin-1 beta production;GO:0043312//neutrophil degranulation;GO:0044342//type B pancreatic cell proliferation
[truncated: 19,910 more rows]
